# Supplementary material for: Integrated Genetic, Epigenetic, and Transcriptional Profiling Identifies Molecular Pathways in the Development of Laterally Spreading Tumors
Source: Oxford University Press journal article supplement (doi:10.1158/1541-7786.mcr-16-0175), 2016-09-26
Supplement: 15417786mcr160175-sup-165857_1_supp_3615940_8bj153.xlsx [file 15417786mcr160175-sup-165857_1_supp_3615940_8bj153.xlsx]

## Sheet: Summary of all LSTs
Total # of epigenetically inactivated genes	1389
Total # of recurrently epigenetically inactivated genes (>1)	557
Average # in G-LSTs	287.714
Average # in NG-LSTs	114.5
# of genes epigenetically inactivated recurrently (>1) only in G-LSTs	315
# of genes epigenetically inactivated recurrently (>1) only in NG-LSTs	9
# of genes epigenetically inactivated only in G-LSTs	989
# of genes epigenetically inactivated only in NG-LSTs	167
t-test	0.034096
# in each lesion	275	564	340	263	331	171	70	53	225	79	101	287.714	114.5
	1	2	3	4	5	G1	G2	NG	81	82	85	G-LSTs SUM	NG-LSTs SUM	SUM
KIF5C	KIF5C	KIF5C	KIF5C	KIF5C	KIF5C	KIF5C		KIF5C	KIF5C		KIF5C	6	3	9
ANO5	ANO5	ANO5		ANO5	ANO5	ANO5	ANO5	ANO5	ANO5		ANO5	6	3	9
GPR12	GPR12	GPR12	GPR12	GPR12	GPR12	GPR12	GPR12	GPR12				7	1	8
AGTR1	AGTR1	AGTR1	AGTR1			AGTR1	AGTR1	AGTR1	AGTR1	AGTR1		5	3	8
AP3B2		AP3B2	AP3B2	AP3B2	AP3B2	AP3B2		AP3B2	AP3B2	AP3B2		5	3	8
ZSCAN18	ZSCAN18	ZSCAN18	ZSCAN18	ZSCAN18	ZSCAN18	ZSCAN18	ZSCAN18					7	0	7
ZNF625	ZNF625	ZNF625	ZNF625	ZNF625	ZNF625		ZNF625		ZNF625			6	1	7
MAP1B	MAP1B	MAP1B	MAP1B		MAP1B	MAP1B	MAP1B	MAP1B				6	1	7
SYT2	SYT2			SYT2	SYT2	SYT2	SYT2	SYT2	SYT2			5	2	7
SLITRK5	SLITRK5	SLITRK5	SLITRK5	SLITRK5	SLITRK5	SLITRK5					SLITRK5	6	1	7
CCDC169	CCDC169	CCDC169	CCDC169			CCDC169	CCDC169	CCDC169			CCDC169	5	2	7
ADHFE1	ADHFE1	ADHFE1		ADHFE1	ADHFE1	ADHFE1	ADHFE1				ADHFE1	6	1	7
ABCC8	ABCC8	ABCC8	ABCC8	ABCC8	ABCC8				ABCC8		ABCC8	5	2	7
FEV	FEV	FEV			FEV	FEV	FEV	FEV	FEV			5	2	7
CLGN	CLGN	CLGN	CLGN			CLGN	CLGN		CLGN	CLGN		5	2	7
GPC5	GPC5	GPC5	GPC5		GPC5				GPC5	GPC5	GPC5	4	3	7
HYDIN	HYDIN	HYDIN	HYDIN		HYDIN	HYDIN		HYDIN	HYDIN			5	2	7
SSTR2	SSTR2		SSTR2	SSTR2	SSTR2	SSTR2	SSTR2					6	0	6
UST	UST	UST		UST	UST	UST	UST					6	0	6
CLVS2	CLVS2	CLVS2	CLVS2		CLVS2	CLVS2			CLVS2			5	1	6
ZNF682	ZNF682	ZNF682	ZNF682		ZNF682	ZNF682	ZNF682					6	0	6
ZNF549	ZNF549	ZNF549	ZNF549	ZNF549			ZNF549		ZNF549			5	1	6
ZNF415	ZNF415		ZNF415	ZNF415	ZNF415	ZNF415		ZNF415				5	1	6
LPHN2	LPHN2			LPHN2		LPHN2	LPHN2	LPHN2	LPHN2			4	2	6
MEIS1-AS3	MEIS1-AS3			MEIS1-AS3		MEIS1-AS3	MEIS1-AS3	MEIS1-AS3	MEIS1-AS3			4	2	6
ZNF781	ZNF781	ZNF781		ZNF781		ZNF781		ZNF781	ZNF781			4	2	6
DPP10	DPP10	DPP10	DPP10			DPP10	DPP10		DPP10			5	1	6
FSTL4	FSTL4	FSTL4			FSTL4	FSTL4	FSTL4	FSTL4				5	1	6
HDGFRP3	HDGFRP3	HDGFRP3		HDGFRP3		HDGFRP3	HDGFRP3		HDGFRP3			5	1	6
KIRREL3	KIRREL3	KIRREL3	KIRREL3			KIRREL3	KIRREL3		KIRREL3			5	1	6
LOC389023	LOC389023	LOC389023	LOC389023			LOC389023	LOC389023		LOC389023			5	1	6
CNTN1	CNTN1	CNTN1	CNTN1	CNTN1					CNTN1		CNTN1	4	2	6
ZNF568		ZNF568	ZNF568		ZNF568	ZNF568	ZNF568		ZNF568			5	1	6
PCDHGC3		PCDHGC3		PCDHGC3	PCDHGC3	PCDHGC3	PCDHGC3	PCDHGC3				5	1	6
ZNF43		ZNF43		ZNF43	ZNF43		ZNF43		ZNF43	ZNF43		4	2	6
GALNT14		GALNT14	GALNT14		GALNT14	GALNT14		GALNT14			GALNT14	4	2	6
MYO3A		MYO3A	MYO3A	MYO3A		MYO3A			MYO3A		MYO3A	4	2	6
MPPED2			MPPED2	MPPED2		MPPED2	MPPED2	MPPED2			MPPED2	4	2	6
TIAM1			TIAM1	TIAM1	TIAM1	TIAM1		TIAM1			TIAM1	4	2	6
ZNF331	ZNF331	ZNF331	ZNF331	ZNF331	ZNF331							5	0	5
ZNF790-AS1	ZNF790-AS1	ZNF790-AS1		ZNF790-AS1	ZNF790-AS1	ZNF790-AS1						5	0	5
ZNF793	ZNF793	ZNF793			ZNF793	ZNF793	ZNF793					5	0	5
WASF3	WASF3		WASF3		WASF3	WASF3					WASF3	4	1	5
CCBE1	CCBE1		CCBE1	CCBE1	CCBE1						CCBE1	4	1	5
ZNF880	ZNF880	ZNF880				ZNF880	ZNF880	ZNF880				4	1	5
ZMAT4	ZMAT4	ZMAT4	ZMAT4							ZMAT4	ZMAT4	3	2	5
BMP3	BMP3		BMP3	BMP3	BMP3	BMP3						5	0	5
NTRK3	NTRK3	NTRK3	NTRK3	NTRK3	NTRK3							5	0	5
ASCL1	ASCL1	ASCL1	ASCL1	ASCL1	ASCL1							5	0	5
PCDH9	PCDH9	PCDH9		PCDH9	PCDH9				PCDH9			4	1	5
CPNE8	CPNE8	CPNE8			CPNE8				CPNE8	CPNE8		3	2	5
EVX2	EVX2			EVX2	EVX2				EVX2		EVX2	3	2	5
NR3C1		NR3C1	NR3C1	NR3C1	NR3C1				NR3C1			4	1	5
NGFR		NGFR	NGFR	NGFR	NGFR	NGFR						5	0	5
LONRF2		LONRF2	LONRF2	LONRF2	LONRF2	LONRF2						5	0	5
ZNF492		ZNF492	ZNF492	ZNF492		ZNF492				ZNF492		4	1	5
NPTX1		NPTX1				NPTX1	NPTX1	NPTX1	NPTX1			3	2	5
VGLL3		VGLL3				VGLL3	VGLL3	VGLL3	VGLL3			3	2	5
EDIL3		EDIL3	EDIL3		EDIL3	EDIL3					EDIL3	4	1	5
GALNT18		GALNT18			GALNT18	GALNT18	GALNT18	GALNT18				4	1	5
FLNC		FLNC			FLNC	FLNC		FLNC	FLNC			3	2	5
FMN2		FMN2				FMN2			FMN2	FMN2	FMN2	2	3	5
SEMA6D		SEMA6D	SEMA6D	SEMA6D		SEMA6D			SEMA6D			4	1	5
ZNF334		ZNF334	ZNF334	ZNF334		ZNF334			ZNF334			4	1	5
PPFIA2			PPFIA2	PPFIA2	PPFIA2	PPFIA2	PPFIA2					5	0	5
EFCAB1			EFCAB1			EFCAB1	EFCAB1			EFCAB1	EFCAB1	3	2	5
PTPRZ1	PTPRZ1			PTPRZ1	PTPRZ1		PTPRZ1					4	0	4
PHACTR3	PHACTR3		PHACTR3	PHACTR3	PHACTR3							4	0	4
FGF14-AS2	FGF14-AS2	FGF14-AS2	FGF14-AS2								FGF14-AS2	3	1	4
DPY19L2	DPY19L2		DPY19L2		DPY19L2						DPY19L2	3	1	4
TACR1	TACR1			TACR1		TACR1	TACR1					4	0	4
HECW1	HECW1	HECW1				HECW1					HECW1	3	1	4
UNC5C	UNC5C		UNC5C	UNC5C		UNC5C						4	0	4
SHISA3	SHISA3	SHISA3	SHISA3						SHISA3			3	1	4
ZDHHC22	ZDHHC22	ZDHHC22		ZDHHC22		ZDHHC22						4	0	4
TMEFF2	TMEFF2			TMEFF2		TMEFF2			TMEFF2			3	1	4
VWC2	VWC2	VWC2		VWC2	VWC2							4	0	4
ADAMTS1	ADAMTS1	ADAMTS1		ADAMTS1		ADAMTS1						4	0	4
ROR2	ROR2	ROR2	ROR2		ROR2							4	0	4
FAM110B	FAM110B	FAM110B			FAM110B						FAM110B	3	1	4
ZNF528	ZNF528			ZNF528	ZNF528	ZNF528						4	0	4
ZNF701	ZNF701	ZNF701			ZNF701		ZNF701					4	0	4
ADCY1	ADCY1	ADCY1		ADCY1					ADCY1			3	1	4
KIF26A	KIF26A	KIF26A		KIF26A		KIF26A						4	0	4
EPHA7	EPHA7		EPHA7	EPHA7					EPHA7			3	1	4
HIF3A	HIF3A			HIF3A	HIF3A	HIF3A						4	0	4
ZNF229	ZNF229	ZNF229	ZNF229	ZNF229								4	0	4
FGF9	FGF9			FGF9	FGF9				FGF9			3	1	4
TUB	TUB	TUB		TUB					TUB			3	1	4
ST8SIA2	ST8SIA2			ST8SIA2					ST8SIA2	ST8SIA2		2	2	4
PROCA1	PROCA1			PROCA1	PROCA1				PROCA1			3	1	4
NOVA1	NOVA1	NOVA1	NOVA1			NOVA1						4	0	4
RAB3C	RAB3C	RAB3C	RAB3C		RAB3C							4	0	4
MPP2	MPP2	MPP2	MPP2			MPP2						4	0	4
CHFR	CHFR			CHFR	CHFR				CHFR			3	1	4
VAV2	VAV2	VAV2			VAV2					VAV2		3	1	4
MYLK	MYLK				MYLK	MYLK		MYLK				3	1	4
SGK1	SGK1	SGK1		SGK1					SGK1			3	1	4
NRXN2	NRXN2	NRXN2			NRXN2					NRXN2		3	1	4
SYT5	SYT5	SYT5	SYT5						SYT5			3	1	4
MATK	MATK	MATK	MATK						MATK			3	1	4
HCN4	HCN4	HCN4				HCN4			HCN4			3	1	4
GRIN2C		GRIN2C	GRIN2C			GRIN2C	GRIN2C					4	0	4
NTNG1		NTNG1	NTNG1	NTNG1					NTNG1			3	1	4
ZNF304		ZNF304		ZNF304		ZNF304	ZNF304					4	0	4
B3GAT1		B3GAT1		B3GAT1	B3GAT1	B3GAT1						4	0	4
DPF1		DPF1			DPF1	DPF1			DPF1			3	1	4
ANKS1B		ANKS1B				ANKS1B		ANKS1B	ANKS1B			2	2	4
HAND2		HAND2	HAND2	HAND2		HAND2						4	0	4
ST3GAL6-AS1		ST3GAL6-AS1				ST3GAL6-AS1	ST3GAL6-AS1	ST3GAL6-AS1				3	1	4
PPP2R2B		PPP2R2B	PPP2R2B	PPP2R2B	PPP2R2B							4	0	4
ST8SIA5		ST8SIA5				ST8SIA5	ST8SIA5	ST8SIA5				3	1	4
RIC3		RIC3	RIC3	RIC3		RIC3						4	0	4
JAKMIP1		JAKMIP1	JAKMIP1	JAKMIP1					JAKMIP1			3	1	4
PCDH11X		PCDH11X	PCDH11X	PCDH11X							PCDH11X	3	1	4
KCNQ5		KCNQ5	KCNQ5	KCNQ5							KCNQ5	3	1	4
RELN		RELN	RELN			RELN		RELN				3	1	4
C8orf42		C8orf42	C8orf42		C8orf42	C8orf42						4	0	4
NTRK1		NTRK1	NTRK1		NTRK1				NTRK1			3	1	4
TWIST1		TWIST1	TWIST1	TWIST1					TWIST1			3	1	4
RIMS2		RIMS2	RIMS2	RIMS2					RIMS2			3	1	4
DSCAML1		DSCAML1		DSCAML1		DSCAML1			DSCAML1			3	1	4
TUSC3		TUSC3	TUSC3	TUSC3							TUSC3	3	1	4
CDH22		CDH22	CDH22		CDH22			CDH22				3	1	4
SEPT5-GP1BB		SEPT5-GP1BB	SEPT5-GP1BB			SEPT5-GP1BB					SEPT5-GP1BB	3	1	4
SEPT5		SEPT5	SEPT5			SEPT5					SEPT5	3	1	4
SCGN		SCGN			SCGN				SCGN	SCGN		2	2	4
MYH10			MYH10	MYH10	MYH10		MYH10					4	0	4
LIFR			LIFR	LIFR	LIFR					LIFR		3	1	4
TLL1			TLL1	TLL1		TLL1	TLL1					4	0	4
RGMA			RGMA	RGMA	RGMA	RGMA						4	0	4
ADD2			ADD2	ADD2	ADD2	ADD2						4	0	4
CTNND2			CTNND2	CTNND2	CTNND2	CTNND2						4	0	4
FAM150A				FAM150A	FAM150A		FAM150A	FAM150A				3	1	4
ZNF134				ZNF134	ZNF134	ZNF134			ZNF134			3	1	4
ZNF829	ZNF829	ZNF829					ZNF829					3	0	3
SLC6A15	SLC6A15					SLC6A15	SLC6A15					3	0	3
LPPR4	LPPR4			LPPR4					LPPR4			2	1	3
EYA4	EYA4								EYA4		EYA4	1	2	3
ELOVL4	ELOVL4				ELOVL4				ELOVL4			2	1	3
SPOCK3	SPOCK3		SPOCK3						SPOCK3			2	1	3
CD1D	CD1D				CD1D				CD1D			2	1	3
AK5	AK5			AK5							AK5	2	1	3
NIM1	NIM1						NIM1		NIM1			2	1	3
PTPRO	PTPRO			PTPRO		PTPRO						3	0	3
CRLF1	CRLF1				CRLF1	CRLF1						3	0	3
SLC26A5	SLC26A5	SLC26A5				SLC26A5						3	0	3
APBB1	APBB1	APBB1		APBB1								3	0	3
SYT6	SYT6			SYT6		SYT6						3	0	3
DOK5	DOK5	DOK5		DOK5								3	0	3
NELL2	NELL2			NELL2	NELL2							3	0	3
ZNF347	ZNF347	ZNF347			ZNF347							3	0	3
KL	KL		KL		KL							3	0	3
HOXC4	HOXC4	HOXC4			HOXC4							3	0	3
LINC00693	LINC00693	LINC00693								LINC00693		2	1	3
NECAB1	NECAB1	NECAB1		NECAB1								3	0	3
KIRREL2	KIRREL2	KIRREL2	KIRREL2									3	0	3
PTH1R	PTH1R	PTH1R				PTH1R						3	0	3
KCNB2	KCNB2	KCNB2			KCNB2							3	0	3
NLGN1	NLGN1				NLGN1					NLGN1		2	1	3
G0S2	G0S2	G0S2			G0S2							3	0	3
RNF144A-AS1	RNF144A-AS1								RNF144A-AS1		RNF144A-AS1	1	2	3
LRAT	LRAT								LRAT		LRAT	1	2	3
DUSP26	DUSP26	DUSP26	DUSP26									3	0	3
HOXA1	HOXA1	HOXA1			HOXA1							3	0	3
HOTAIRM1	HOTAIRM1	HOTAIRM1			HOTAIRM1							3	0	3
MEIS1	MEIS1				MEIS1	MEIS1						3	0	3
THRB	THRB				THRB		THRB					3	0	3
GABRB2	GABRB2	GABRB2	GABRB2									3	0	3
CACNA2D1	CACNA2D1	CACNA2D1			CACNA2D1							3	0	3
ZBTB16	ZBTB16	ZBTB16			ZBTB16							3	0	3
THRB-AS1	THRB-AS1				THRB-AS1		THRB-AS1					3	0	3
NTRK2	NTRK2				NTRK2				NTRK2			2	1	3
EPB41L4A	EPB41L4A				EPB41L4A				EPB41L4A			2	1	3
KCNK2	KCNK2	KCNK2							KCNK2			2	1	3
FLJ11235	FLJ11235				FLJ11235				FLJ11235			2	1	3
RGAG4	RGAG4		RGAG4							RGAG4		2	1	3
GPR98	GPR98							GPR98	GPR98			1	2	3
FGF13	FGF13		FGF13		FGF13							3	0	3
GHR	GHR				GHR					GHR		2	1	3
C11orf96		C11orf96	C11orf96	C11orf96								3	0	3
USP44		USP44			USP44				USP44			2	1	3
ST8SIA1		ST8SIA1	ST8SIA1		ST8SIA1							3	0	3
TFPI2		TFPI2		TFPI2	TFPI2							3	0	3
CDH4		CDH4				CDH4			CDH4			2	1	3
GPM6A		GPM6A		GPM6A							GPM6A	2	1	3
KLHL14		KLHL14			KLHL14		KLHL14					3	0	3
RSPO3		RSPO3	RSPO3		RSPO3							3	0	3
NRG1		NRG1	NRG1	NRG1								3	0	3
NBLA00301		NBLA00301		NBLA00301		NBLA00301						3	0	3
ANKLE1		ANKLE1		ANKLE1							ANKLE1	2	1	3
CD40		CD40	CD40		CD40							3	0	3
WDR17		WDR17	WDR17		WDR17							3	0	3
RNF150		RNF150		RNF150	RNF150							3	0	3
LOC100289092		LOC100289092	LOC100289092	LOC100289092								3	0	3
CNR1		CNR1	CNR1		CNR1							3	0	3
SPG20		SPG20	SPG20	SPG20								3	0	3
C12orf42		C12orf42	C12orf42								C12orf42	2	1	3
DMRTA1		DMRTA1							DMRTA1		DMRTA1	1	2	3
LOC100287846		LOC100287846			LOC100287846				LOC100287846			2	1	3
SUSD4		SUSD4	SUSD4			SUSD4						3	0	3
CBLN2		CBLN2	CBLN2	CBLN2								3	0	3
OLFM1		OLFM1			OLFM1	OLFM1						3	0	3
ZNF570		ZNF570		ZNF570	ZNF570							3	0	3
DCLK1		DCLK1		DCLK1					DCLK1			2	1	3
CRISPLD1		CRISPLD1	CRISPLD1	CRISPLD1								3	0	3
SLC16A12		SLC16A12	SLC16A12	SLC16A12								3	0	3
TUBB2B		TUBB2B	TUBB2B		TUBB2B							3	0	3
MED12L		MED12L			MED12L	MED12L						3	0	3
ST6GALNAC5		ST6GALNAC5	ST6GALNAC5								ST6GALNAC5	2	1	3
MGARP		MGARP	MGARP								MGARP	2	1	3
FBXO27		FBXO27	FBXO27		FBXO27							3	0	3
ZNF93		ZNF93			ZNF93		ZNF93					3	0	3
NPY2R		NPY2R	NPY2R			NPY2R						3	0	3
LMX1A		LMX1A	LMX1A			LMX1A						3	0	3
ARHGAP36		ARHGAP36	ARHGAP36			ARHGAP36						3	0	3
ZNF418		ZNF418	ZNF418	ZNF418								3	0	3
SORCS3		SORCS3	SORCS3	SORCS3								3	0	3
DUSP5		DUSP5		DUSP5	DUSP5							3	0	3
SLFN13		SLFN13	SLFN13	SLFN13								3	0	3
SLC30A10		SLC30A10	SLC30A10						SLC30A10			2	1	3
TMEM255A		TMEM255A	TMEM255A								TMEM255A	2	1	3
CDH23		CDH23		CDH23	CDH23							3	0	3
KIF1A		KIF1A	KIF1A		KIF1A							3	0	3
KIAA2022		KIAA2022	KIAA2022								KIAA2022	2	1	3
ZNF256		ZNF256			ZNF256				ZNF256			2	1	3
CHAT		CHAT		CHAT		CHAT						3	0	3
MEDAG		MEDAG				MEDAG		MEDAG				2	1	3
FAM132A		FAM132A				FAM132A					FAM132A	2	1	3
IGSF21		IGSF21				IGSF21		IGSF21				2	1	3
CHGB		CHGB	CHGB		CHGB							3	0	3
SORCS1		SORCS1	SORCS1	SORCS1								3	0	3
SLITRK2		SLITRK2	SLITRK2			SLITRK2						3	0	3
CNGA3		CNGA3	CNGA3	CNGA3								3	0	3
MIR3687		MIR3687				MIR3687		MIR3687				2	1	3
FAM19A5			FAM19A5		FAM19A5				FAM19A5			2	1	3
LRRC3B			LRRC3B	LRRC3B		LRRC3B						3	0	3
ADAMTS19			ADAMTS19	ADAMTS19							ADAMTS19	2	1	3
RADIL			RADIL			RADIL		RADIL				2	1	3
GNE			GNE			GNE					GNE	2	1	3
CHRDL1			CHRDL1		CHRDL1						CHRDL1	2	1	3
TMEM130			TMEM130		TMEM130						TMEM130	2	1	3
PABPC5			PABPC5						PABPC5	PABPC5		1	2	3
SPHKAP			SPHKAP	SPHKAP							SPHKAP	2	1	3
TRIM9			TRIM9	TRIM9							TRIM9	2	1	3
AMER3			AMER3	AMER3						AMER3		2	1	3
RHOF			RHOF	RHOF					RHOF			2	1	3
UNC13A			UNC13A						UNC13A		UNC13A	1	2	3
ZNF813				ZNF813	ZNF813		ZNF813					3	0	3
METTL24				METTL24		METTL24		METTL24				2	1	3
SPATA32				SPATA32					SPATA32		SPATA32	1	2	3
LAMA1				LAMA1		LAMA1					LAMA1	2	1	3
LMO1					LMO1	LMO1		LMO1				2	1	3
LINC00643					LINC00643				LINC00643	LINC00643		1	2	3
SLC26A4-AS1					SLC26A4-AS1	SLC26A4-AS1		SLC26A4-AS1				2	1	3
SLC8A3					SLC8A3	SLC8A3			SLC8A3			2	1	3
CCDC85A					CCDC85A	CCDC85A				CCDC85A		2	1	3
FGF14-IT1						FGF14-IT1	FGF14-IT1				FGF14-IT1	2	1	3
PLXNA4						PLXNA4	PLXNA4	PLXNA4				2	1	3
CCDC181						CCDC181			CCDC181		CCDC181	1	2	3
KCNIP1						KCNIP1			KCNIP1		KCNIP1	1	2	3
WSCD1						WSCD1		WSCD1	WSCD1			1	2	3
TRPC4	TRPC4		TRPC4									2	0	2
NPAS1	NPAS1				NPAS1							2	0	2
PALM2	PALM2					PALM2						2	0	2
KCNIP4	KCNIP4			KCNIP4								2	0	2
LRFN5	LRFN5								LRFN5			1	1	2
ZNF606	ZNF606			ZNF606								2	0	2
DPYSL5	DPYSL5					DPYSL5						2	0	2
SYNDIG1	SYNDIG1	SYNDIG1										2	0	2
TMEM74	TMEM74				TMEM74							2	0	2
WNT7A	WNT7A		WNT7A									2	0	2
MMP17	MMP17		MMP17									2	0	2
VAV3	VAV3		VAV3									2	0	2
DOCK3	DOCK3				DOCK3							2	0	2
TMEM196	TMEM196				TMEM196							2	0	2
ROBO3	ROBO3			ROBO3								2	0	2
LRP1B	LRP1B				LRP1B							2	0	2
SLC26A4	SLC26A4							SLC26A4				1	1	2
C8orf34	C8orf34										C8orf34	1	1	2
KCNA2	KCNA2	KCNA2										2	0	2
ASIC2	ASIC2			ASIC2								2	0	2
LOC100499484-C9ORF174	LOC100499484-C9ORF174				LOC100499484-C9ORF174							2	0	2
RET	RET				RET							2	0	2
RUNDC3A	RUNDC3A			RUNDC3A								2	0	2
MAP6	MAP6				MAP6							2	0	2
CHRFAM7A	CHRFAM7A								CHRFAM7A			1	1	2
LOC100499484	LOC100499484				LOC100499484							2	0	2
ATCAY	ATCAY			ATCAY								2	0	2
TRPC3	TRPC3	TRPC3										2	0	2
ZNF461	ZNF461	ZNF461										2	0	2
CALCR	CALCR	CALCR										2	0	2
LINGO2	LINGO2	LINGO2										2	0	2
TRABD2B	TRABD2B				TRABD2B							2	0	2
STMN2	STMN2				STMN2							2	0	2
RGS17	RGS17	RGS17										2	0	2
CYP4F22	CYP4F22				CYP4F22							2	0	2
HS6ST3	HS6ST3										HS6ST3	1	1	2
RYR1	RYR1								RYR1			1	1	2
PGBD5	PGBD5								PGBD5			1	1	2
ADAMTS10	ADAMTS10										ADAMTS10	1	1	2
SV2C	SV2C				SV2C							2	0	2
NEURL	NEURL								NEURL			1	1	2
ZNF614	ZNF614				ZNF614							2	0	2
HS3ST6	HS3ST6				HS3ST6							2	0	2
B3GALNT1	B3GALNT1									B3GALNT1		1	1	2
FN1	FN1				FN1							2	0	2
FAM184A	FAM184A				FAM184A							2	0	2
ZNF615	ZNF615				ZNF615							2	0	2
CCDC39	CCDC39				CCDC39							2	0	2
ZNF655	ZNF655				ZNF655							2	0	2
NOL4	NOL4				NOL4							2	0	2
ST8SIA6	ST8SIA6				ST8SIA6							2	0	2
SLC38A3	SLC38A3				SLC38A3							2	0	2
ACHE	ACHE					ACHE						2	0	2
LRFN2	LRFN2				LRFN2							2	0	2
MAPK4	MAPK4	MAPK4										2	0	2
ST6GAL2	ST6GAL2					ST6GAL2						2	0	2
PCSK1N	PCSK1N				PCSK1N							2	0	2
PPP1R1A	PPP1R1A				PPP1R1A							2	0	2
SCNN1G	SCNN1G				SCNN1G							2	0	2
LOC642366	LOC642366			LOC642366								2	0	2
GNG4	GNG4	GNG4										2	0	2
TSPAN7	TSPAN7				TSPAN7							2	0	2
NRK	NRK	NRK										2	0	2
ZNF681	ZNF681				ZNF681							2	0	2
RUNDC3B	RUNDC3B				RUNDC3B							2	0	2
RIMKLB	RIMKLB				RIMKLB							2	0	2
BAI3	BAI3			BAI3								2	0	2
SCG3	SCG3				SCG3							2	0	2
MCOLN2	MCOLN2				MCOLN2							2	0	2
MFSD4	MFSD4										MFSD4	1	1	2
EPB41L3	EPB41L3								EPB41L3			1	1	2
PRKAA2	PRKAA2								PRKAA2			1	1	2
NEURL1B	NEURL1B										NEURL1B	1	1	2
KIAA1239	KIAA1239								KIAA1239			1	1	2
FAM218A	FAM218A		FAM218A									2	0	2
WFDC2	WFDC2										WFDC2	1	1	2
CPNE4	CPNE4	CPNE4										2	0	2
TTLL7	TTLL7				TTLL7							2	0	2
ADARB2		ADARB2			ADARB2							2	0	2
PRKCB		PRKCB			PRKCB							2	0	2
ZBTB8B		ZBTB8B		ZBTB8B								2	0	2
CCDC169-SOHLH2		CCDC169-SOHLH2	CCDC169-SOHLH2									2	0	2
SNX32		SNX32				SNX32						2	0	2
SOX5		SOX5			SOX5							2	0	2
ZNF530		ZNF530			ZNF530							2	0	2
TMEM163		TMEM163		TMEM163								2	0	2
ZFP82		ZFP82				ZFP82						2	0	2
ZNF610		ZNF610			ZNF610							2	0	2
SLC47A1		SLC47A1	SLC47A1									2	0	2
CNKSR2		CNKSR2			CNKSR2							2	0	2
ZNF790		ZNF790		ZNF790								2	0	2
LHFPL3		LHFPL3	LHFPL3									2	0	2
VTN		VTN				VTN						2	0	2
ZNF264		ZNF264			ZNF264							2	0	2
ZKSCAN7		ZKSCAN7		ZKSCAN7								2	0	2
LOC100128398		LOC100128398		LOC100128398								2	0	2
ZNF730		ZNF730							ZNF730			1	1	2
ESR1		ESR1		ESR1								2	0	2
SPG20OS		SPG20OS	SPG20OS									2	0	2
CUX2		CUX2	CUX2									2	0	2
FAM72D		FAM72D	FAM72D									2	0	2
NPR1		NPR1			NPR1							2	0	2
ALOX15P1		ALOX15P1			ALOX15P1							2	0	2
C16orf45		C16orf45				C16orf45						2	0	2
ALX4		ALX4	ALX4									2	0	2
HIST1H4L		HIST1H4L					HIST1H4L					2	0	2
EGR2		EGR2	EGR2									2	0	2
UNC5A		UNC5A	UNC5A									2	0	2
ZNF547		ZNF547							ZNF547			1	1	2
ULK4P2		ULK4P2							ULK4P2			1	1	2
ZNF542		ZNF542		ZNF542								2	0	2
NTNG2		NTNG2				NTNG2						2	0	2
LAYN		LAYN	LAYN									2	0	2
SMOC1		SMOC1					SMOC1					2	0	2
STARD8		STARD8					STARD8					2	0	2
ZDBF2		ZDBF2			ZDBF2							2	0	2
EPHA6		EPHA6		EPHA6								2	0	2
INSRR		INSRR	INSRR									2	0	2
NAP1L3		NAP1L3	NAP1L3									2	0	2
GABBR2		GABBR2	GABBR2									2	0	2
CCDC8		CCDC8		CCDC8								2	0	2
KCNK13		KCNK13			KCNK13							2	0	2
SLCO4C1		SLCO4C1									SLCO4C1	1	1	2
FAM72B		FAM72B	FAM72B									2	0	2
ATP8A2		ATP8A2									ATP8A2	1	1	2
KHDRBS2		KHDRBS2							KHDRBS2			1	1	2
NCAM2		NCAM2	NCAM2									2	0	2
FAM155B		FAM155B	FAM155B									2	0	2
PSD		PSD		PSD								2	0	2
ULK4P3		ULK4P3			ULK4P3							2	0	2
CORO2B		CORO2B			CORO2B							2	0	2
FGF13-AS1		FGF13-AS1				FGF13-AS1						2	0	2
DDIT4L		DDIT4L				DDIT4L						2	0	2
LOC100505715		LOC100505715			LOC100505715							2	0	2
MAFA		MAFA			MAFA							2	0	2
PCDH11Y		PCDH11Y	PCDH11Y									2	0	2
DBC1		DBC1		DBC1								2	0	2
KCNK12		KCNK12		KCNK12								2	0	2
AMPH		AMPH	AMPH									2	0	2
BATF3		BATF3			BATF3							2	0	2
SNAP25		SNAP25	SNAP25									2	0	2
TCTEX1D1		TCTEX1D1		TCTEX1D1								2	0	2
CHST1		CHST1					CHST1					2	0	2
RBM20		RBM20							RBM20			1	1	2
EYA2		EYA2	EYA2									2	0	2
SLIT1		SLIT1							SLIT1			1	1	2
SLC9A3		SLC9A3							SLC9A3			1	1	2
BEND6		BEND6		BEND6								2	0	2
IGLON5		IGLON5						IGLON5				1	1	2
WDR86		WDR86	WDR86									2	0	2
MAPK8IP1		MAPK8IP1				MAPK8IP1						2	0	2
FOXP2		FOXP2			FOXP2							2	0	2
EOMES		EOMES		EOMES								2	0	2
STK33		STK33									STK33	1	1	2
SEMA7A		SEMA7A									SEMA7A	1	1	2
SV2B		SV2B			SV2B							2	0	2
ZNF132		ZNF132		ZNF132								2	0	2
DISP2		DISP2			DISP2							2	0	2
BEX1		BEX1	BEX1									2	0	2
MARCH4		MARCH4	MARCH4									2	0	2
SYNM		SYNM	SYNM									2	0	2
FADS6		FADS6				FADS6						2	0	2
ZNF208		ZNF208		ZNF208								2	0	2
ZNF853		ZNF853		ZNF853								2	0	2
INSM1		INSM1	INSM1									2	0	2
CACNA1A		CACNA1A	CACNA1A									2	0	2
KCNJ12		KCNJ12	KCNJ12									2	0	2
C1orf95		C1orf95			C1orf95							2	0	2
CDO1		CDO1	CDO1									2	0	2
FGF14		FGF14		FGF14								2	0	2
CELF4		CELF4		CELF4								2	0	2
ST3GAL4		ST3GAL4									ST3GAL4	1	1	2
NEUROG3		NEUROG3	NEUROG3									2	0	2
SHD		SHD							SHD			1	1	2
EMID1		EMID1							EMID1			1	1	2
MMP25		MMP25							MMP25			1	1	2
VWDE		VWDE			VWDE							2	0	2
DOCK10		DOCK10			DOCK10							2	0	2
TMEM200A		TMEM200A							TMEM200A			1	1	2
OTOP2		OTOP2							OTOP2			1	1	2
NPPC		NPPC			NPPC							2	0	2
RPL39L		RPL39L									RPL39L	1	1	2
ZFHX4		ZFHX4	ZFHX4									2	0	2
ZNF677		ZNF677							ZNF677			1	1	2
CKMT1B		CKMT1B									CKMT1B	1	1	2
OTOP3		OTOP3		OTOP3								2	0	2
ESRRG		ESRRG	ESRRG									2	0	2
LOC728392		LOC728392		LOC728392								2	0	2
PTGIS		PTGIS	PTGIS									2	0	2
CLIP4		CLIP4		CLIP4								2	0	2
MIR663A		MIR663A				MIR663A						2	0	2
TBX18		TBX18	TBX18									2	0	2
PTPRN		PTPRN		PTPRN								2	0	2
HOMER2		HOMER2							HOMER2			1	1	2
USP2		USP2							USP2			1	1	2
LOC100505738		LOC100505738								LOC100505738		1	1	2
CPLX2		CPLX2	CPLX2									2	0	2
AKR1B1			AKR1B1		AKR1B1							2	0	2
MMP16			MMP16	MMP16								2	0	2
TOX2			TOX2		TOX2							2	0	2
EMBP1			EMBP1	EMBP1								2	0	2
NLGN4X			NLGN4X	NLGN4X								2	0	2
EGFLAM			EGFLAM	EGFLAM								2	0	2
MAGI2-AS3			MAGI2-AS3		MAGI2-AS3							2	0	2
SUSD5			SUSD5								SUSD5	1	1	2
CNRIP1			CNRIP1		CNRIP1							2	0	2
STAC2			STAC2			STAC2						2	0	2
CHST10			CHST10		CHST10							2	0	2
KAZN			KAZN						KAZN			1	1	2
UBE2QL1			UBE2QL1	UBE2QL1								2	0	2
TMEM59L			TMEM59L			TMEM59L						2	0	2
DOK6			DOK6								DOK6	1	1	2
ATP1B2			ATP1B2						ATP1B2			1	1	2
SHISA9			SHISA9	SHISA9								2	0	2
AMOTL1			AMOTL1	AMOTL1								2	0	2
LAMP5			LAMP5		LAMP5							2	0	2
DPY19L2P1			DPY19L2P1		DPY19L2P1							2	0	2
NXN			NXN		NXN							2	0	2
ADAMTS8			ADAMTS8			ADAMTS8						2	0	2
GPC6			GPC6	GPC6								2	0	2
ITPRIPL1			ITPRIPL1		ITPRIPL1							2	0	2
VSTM2A			VSTM2A			VSTM2A						2	0	2
PCDH10			PCDH10	PCDH10								2	0	2
TMEM108			TMEM108						TMEM108			1	1	2
CPXM2			CPXM2						CPXM2			1	1	2
HRASLS			HRASLS		HRASLS							2	0	2
GAD2			GAD2	GAD2								2	0	2
CRMP1			CRMP1		CRMP1							2	0	2
PCP4L1			PCP4L1			PCP4L1						2	0	2
STC2			STC2		STC2							2	0	2
ADAM33			ADAM33						ADAM33			1	1	2
TUBB4A			TUBB4A		TUBB4A							2	0	2
BVES-AS1			BVES-AS1						BVES-AS1			1	1	2
RTN4RL1			RTN4RL1						RTN4RL1			1	1	2
RSPO2			RSPO2	RSPO2								2	0	2
CLDN5			CLDN5						CLDN5			1	1	2
CDIP1			CDIP1	CDIP1								2	0	2
CDKN1C			CDKN1C		CDKN1C							2	0	2
C7orf10			C7orf10	C7orf10								2	0	2
JPH3			JPH3	JPH3								2	0	2
GSTM1			GSTM1								GSTM1	1	1	2
CAMK2B			CAMK2B						CAMK2B			1	1	2
HPCA			HPCA						HPCA			1	1	2
CLSTN2				CLSTN2	CLSTN2							2	0	2
FLI1-AS1				FLI1-AS1	FLI1-AS1							2	0	2
RAB39A				RAB39A	RAB39A							2	0	2
ARHGAP20				ARHGAP20	ARHGAP20							2	0	2
EMB				EMB	EMB							2	0	2
ZNF788				ZNF788			ZNF788					2	0	2
PDGFD				PDGFD	PDGFD							2	0	2
GATA4				GATA4					GATA4			1	1	2
NPY				NPY							NPY	1	1	2
CRTAC1				CRTAC1					CRTAC1			1	1	2
LOC644554				LOC644554					LOC644554			1	1	2
CDKN2A				CDKN2A						CDKN2A		1	1	2
UNC5D				UNC5D		UNC5D						2	0	2
NKX2-2				NKX2-2					NKX2-2			1	1	2
C3orf80				C3orf80	C3orf80							2	0	2
TNFRSF19				TNFRSF19		TNFRSF19						2	0	2
ELAVL2				ELAVL2			ELAVL2					2	0	2
FRMD3				FRMD3					FRMD3			1	1	2
GRIK3				GRIK3					GRIK3			1	1	2
SLC27A6				SLC27A6							SLC27A6	1	1	2
NR5A2				NR5A2					NR5A2			1	1	2
CA4				CA4					CA4			1	1	2
GLI3					GLI3		GLI3					2	0	2
ZNF544					ZNF544				ZNF544			1	1	2
MAMLD1					MAMLD1	MAMLD1						2	0	2
SYN2					SYN2	SYN2						2	0	2
SPTBN4					SPTBN4				SPTBN4			1	1	2
TPM1					TPM1					TPM1		1	1	2
DCDC2					DCDC2					DCDC2		1	1	2
CDKN2B					CDKN2B					CDKN2B		1	1	2
B3GNT7					B3GNT7				B3GNT7			1	1	2
NEURL2					NEURL2					NEURL2		1	1	2
KAAG1					KAAG1					KAAG1		1	1	2
PDZRN4						PDZRN4			PDZRN4			1	1	2
TBL1Y						TBL1Y		TBL1Y				1	1	2
ZFP42						ZFP42	ZFP42					2	0	2
MAMDC2						MAMDC2	MAMDC2					2	0	2
KCNS1						KCNS1			KCNS1			1	1	2
HIST1H3F						HIST1H3F	HIST1H3F					2	0	2
HIST1H2BH						HIST1H2BH	HIST1H2BH					2	0	2
TTTY14						TTTY14					TTTY14	1	1	2
GLDN						GLDN		GLDN				1	1	2
DFNA5							DFNA5		DFNA5			1	1	2
GYPC									GYPC		GYPC	0	2	2
KCNAB1									KCNAB1		KCNAB1	0	2	2
XKR6									XKR6		XKR6	0	2	2
IZUMO2									IZUMO2	IZUMO2		0	2	2
RUSC1									RUSC1	RUSC1		0	2	2
SLC2A10									SLC2A10		SLC2A10	0	2	2
KCNG1									KCNG1		KCNG1	0	2	2
ARRDC4										ARRDC4	ARRDC4	0	2	2
EFNA1										EFNA1	EFNA1	0	2	2
EGFL6	EGFL6											1	0	1
SEZ6L	SEZ6L											1	0	1
BDNF	BDNF											1	0	1
WNT6	WNT6											1	0	1
MEGF11	MEGF11											1	0	1
FLJ30403	FLJ30403											1	0	1
ZNF329	ZNF329											1	0	1
NUDT11	NUDT11											1	0	1
IGDCC3	IGDCC3											1	0	1
LOC283731	LOC283731											1	0	1
ZNF577	ZNF577											1	0	1
LOC100144602	LOC100144602											1	0	1
CACNA1G-AS1	CACNA1G-AS1											1	0	1
LOC100287314	LOC100287314											1	0	1
COMP	COMP											1	0	1
ZNF525	ZNF525											1	0	1
HAP1	HAP1											1	0	1
CCDC13	CCDC13											1	0	1
ZNF426	ZNF426											1	0	1
PAX6	PAX6											1	0	1
WNT9B	WNT9B											1	0	1
DKFZp686K1684	DKFZp686K1684											1	0	1
BSN	BSN											1	0	1
MAGED4	MAGED4											1	0	1
FARP1	FARP1											1	0	1
TSHR	TSHR											1	0	1
SPTSSB	SPTSSB											1	0	1
BMPER	BMPER											1	0	1
ZFP30	ZFP30											1	0	1
MAGED4B	MAGED4B											1	0	1
NR4A3	NR4A3											1	0	1
EID2B	EID2B											1	0	1
PRKG1-AS1	PRKG1-AS1											1	0	1
CKM	CKM											1	0	1
CACNB4	CACNB4											1	0	1
ISL1	ISL1											1	0	1
CRABP1	CRABP1											1	0	1
SLC9A7P1	SLC9A7P1											1	0	1
CPE	CPE											1	0	1
ENHO	ENHO											1	0	1
WNT9A	WNT9A											1	0	1
AGPAT9	AGPAT9											1	0	1
C1orf115	C1orf115											1	0	1
FLJ26850	FLJ26850											1	0	1
PARP8	PARP8											1	0	1
SLC30A2	SLC30A2											1	0	1
PDE3A	PDE3A											1	0	1
SPACA5	SPACA5											1	0	1
C8orf47	C8orf47											1	0	1
MAOA	MAOA											1	0	1
TSPAN6	TSPAN6											1	0	1
TCEAL3	TCEAL3											1	0	1
PDGFA	PDGFA											1	0	1
MPP1	MPP1											1	0	1
MGC45922	MGC45922											1	0	1
ZNF702P	ZNF702P											1	0	1
MTM1	MTM1											1	0	1
RNF152	RNF152											1	0	1
CACNG4	CACNG4											1	0	1
RFX6	RFX6											1	0	1
FLJ44511	FLJ44511											1	0	1
LOC100131434	LOC100131434											1	0	1
STXBP5L	STXBP5L											1	0	1
SHROOM2	SHROOM2											1	0	1
NME9	NME9											1	0	1
LRRN2	LRRN2											1	0	1
RNLS	RNLS											1	0	1
HMX2	HMX2											1	0	1
GBX1	GBX1											1	0	1
RRBP1	RRBP1											1	0	1
KCTD12	KCTD12											1	0	1
TMEM221	TMEM221											1	0	1
WNT3A		WNT3A										1	0	1
PPP1R16B		PPP1R16B										1	0	1
RFTN1		RFTN1										1	0	1
RASSF2		RASSF2										1	0	1
LRRN1		LRRN1										1	0	1
PREX1		PREX1										1	0	1
KAL1		KAL1										1	0	1
BHLHE22		BHLHE22										1	0	1
ZNF543		ZNF543										1	0	1
LOC285484		LOC285484										1	0	1
LOC401463		LOC401463										1	0	1
CR1		CR1										1	0	1
GPR37		GPR37										1	0	1
CCK		CCK										1	0	1
FADS1		FADS1										1	0	1
ADAM8		ADAM8										1	0	1
SFRP2		SFRP2										1	0	1
HLTF-AS1		HLTF-AS1										1	0	1
PLCG2		PLCG2										1	0	1
LHX9		LHX9										1	0	1
SYT3		SYT3										1	0	1
FAM72A		FAM72A										1	0	1
FAM65B		FAM65B										1	0	1
RASGRF1		RASGRF1										1	0	1
VAV3-AS1		VAV3-AS1										1	0	1
DGKG		DGKG										1	0	1
HLTF		HLTF										1	0	1
TMEFF1		TMEFF1										1	0	1
LOC400043		LOC400043										1	0	1
KCND2		KCND2										1	0	1
OPRL1		OPRL1										1	0	1
PHF21B		PHF21B										1	0	1
ANKRD34B		ANKRD34B										1	0	1
ABHD8		ABHD8										1	0	1
SDK2		SDK2										1	0	1
DOCK2		DOCK2										1	0	1
PTPN5		PTPN5										1	0	1
SLC43A3		SLC43A3										1	0	1
ZFP28		ZFP28										1	0	1
PDE4B		PDE4B										1	0	1
LHCGR		LHCGR										1	0	1
POU4F1		POU4F1										1	0	1
ELOVL5		ELOVL5										1	0	1
COLGALT2		COLGALT2										1	0	1
SLC1A2		SLC1A2										1	0	1
ANK1		ANK1										1	0	1
EHD3		EHD3										1	0	1
DRD2		DRD2										1	0	1
C5orf49		C5orf49										1	0	1
CYP26A1		CYP26A1										1	0	1
NUP210		NUP210										1	0	1
FMNL1		FMNL1										1	0	1
MAL		MAL										1	0	1
MGC2889		MGC2889										1	0	1
RGS20		RGS20										1	0	1
WIPF1		WIPF1										1	0	1
MLF1		MLF1										1	0	1
ONECUT1		ONECUT1										1	0	1
GPX7		GPX7										1	0	1
RIMS1		RIMS1										1	0	1
MDFIC		MDFIC										1	0	1
TMEM233		TMEM233										1	0	1
FADS2		FADS2										1	0	1
MCF2L2		MCF2L2										1	0	1
ZNF365		ZNF365										1	0	1
ZNF519		ZNF519										1	0	1
HEY2		HEY2										1	0	1
FLT3		FLT3										1	0	1
KCNK3		KCNK3										1	0	1
RCSD1		RCSD1										1	0	1
CHST7		CHST7										1	0	1
BANK1		BANK1										1	0	1
C9orf170		C9orf170										1	0	1
RASSF5		RASSF5										1	0	1
CLDN10		CLDN10										1	0	1
CR2		CR2										1	0	1
GFPT2		GFPT2										1	0	1
LOC100130992		LOC100130992										1	0	1
RAB31		RAB31										1	0	1
ATP6V0C		ATP6V0C										1	0	1
BACH2		BACH2										1	0	1
LOC646999		LOC646999										1	0	1
VGF		VGF										1	0	1
FAM26F		FAM26F										1	0	1
ULK4P1		ULK4P1										1	0	1
NEFL		NEFL										1	0	1
LOC389458		LOC389458										1	0	1
WWTR1-AS1		WWTR1-AS1										1	0	1
BEND4		BEND4										1	0	1
C17orf82		C17orf82										1	0	1
GLDC		GLDC										1	0	1
FOXD4L1		FOXD4L1										1	0	1
FAM3B		FAM3B										1	0	1
NCAN		NCAN										1	0	1
GJA4		GJA4										1	0	1
ZNF471		ZNF471										1	0	1
FGF4		FGF4										1	0	1
AARD		AARD										1	0	1
HHEX		HHEX										1	0	1
CHD5		CHD5										1	0	1
TMEM155		TMEM155										1	0	1
GRM4		GRM4										1	0	1
PRKD1		PRKD1										1	0	1
DTX1		DTX1										1	0	1
RASGRP2		RASGRP2										1	0	1
GDF7		GDF7										1	0	1
MIR3648		MIR3648										1	0	1
SERTM1		SERTM1										1	0	1
GLRA3		GLRA3										1	0	1
PKIA		PKIA										1	0	1
IQSEC3		IQSEC3										1	0	1
PIEZO2		PIEZO2										1	0	1
VWCE		VWCE										1	0	1
DNM1P46		DNM1P46										1	0	1
CDK5R2		CDK5R2										1	0	1
RNF180		RNF180										1	0	1
BMP7		BMP7										1	0	1
ECEL1		ECEL1										1	0	1
EXO5		EXO5										1	0	1
ARHGAP22		ARHGAP22										1	0	1
ZFPM2		ZFPM2										1	0	1
OCA2		OCA2										1	0	1
GRIN3A		GRIN3A										1	0	1
FERMT2		FERMT2										1	0	1
VASH2		VASH2										1	0	1
TTC9B		TTC9B										1	0	1
GABRB3		GABRB3										1	0	1
SKAP2		SKAP2										1	0	1
SHOX2		SHOX2										1	0	1
LOC388242		LOC388242										1	0	1
PCSK2		PCSK2										1	0	1
KCNH4		KCNH4										1	0	1
MAATS1		MAATS1										1	0	1
SLC5A7		SLC5A7										1	0	1
SLIT2		SLIT2										1	0	1
IGFBPL1		IGFBPL1										1	0	1
NGFRAP1		NGFRAP1										1	0	1
ONECUT3		ONECUT3										1	0	1
FTH1P18		FTH1P18										1	0	1
HDAC9		HDAC9										1	0	1
LOC283143		LOC283143										1	0	1
ZIK1		ZIK1										1	0	1
FAM159A		FAM159A										1	0	1
GAD1		GAD1										1	0	1
ADAM12		ADAM12										1	0	1
KANK4		KANK4										1	0	1
BEX2		BEX2										1	0	1
TM6SF2		TM6SF2										1	0	1
DNER		DNER										1	0	1
HIST3H2BB		HIST3H2BB										1	0	1
LOC100133669		LOC100133669										1	0	1
ZNF175		ZNF175										1	0	1
LOC100126784		LOC100126784										1	0	1
LINC00092		LINC00092										1	0	1
DRD4		DRD4										1	0	1
STX2		STX2										1	0	1
PGLYRP1		PGLYRP1										1	0	1
MADCAM1		MADCAM1										1	0	1
NINL		NINL										1	0	1
JAK3		JAK3										1	0	1
SVOPL		SVOPL										1	0	1
MRPS21		MRPS21										1	0	1
RBP4		RBP4										1	0	1
EPHX3		EPHX3										1	0	1
PTPRT		PTPRT										1	0	1
KCNJ6		KCNJ6										1	0	1
ROBO1		ROBO1										1	0	1
ENTPD3		ENTPD3										1	0	1
SOCS3		SOCS3										1	0	1
TMEM179		TMEM179										1	0	1
IRX6		IRX6										1	0	1
GABRA4		GABRA4										1	0	1
FKBP1B		FKBP1B										1	0	1
LOC283856		LOC283856										1	0	1
PER1		PER1										1	0	1
NCCRP1		NCCRP1										1	0	1
TRPV4		TRPV4										1	0	1
GRM7		GRM7										1	0	1
PDE4D		PDE4D										1	0	1
PAX5		PAX5										1	0	1
APBB1IP		APBB1IP										1	0	1
GPRIN1		GPRIN1										1	0	1
ZNF879		ZNF879										1	0	1
ANPEP		ANPEP										1	0	1
LOC613038		LOC613038										1	0	1
SERP2		SERP2										1	0	1
LRRC10B		LRRC10B										1	0	1
ARNT2		ARNT2										1	0	1
RALYL		RALYL										1	0	1
LTF		LTF										1	0	1
TMEM132C		TMEM132C										1	0	1
IRX4		IRX4										1	0	1
LPL		LPL										1	0	1
A4GALT		A4GALT										1	0	1
KLF2		KLF2										1	0	1
SRD5A1P1		SRD5A1P1										1	0	1
TMSB15B		TMSB15B										1	0	1
DIRAS2		DIRAS2										1	0	1
MAGEE1		MAGEE1										1	0	1
DKK1		DKK1										1	0	1
SLFN12L		SLFN12L										1	0	1
KLHL34		KLHL34										1	0	1
LRRK2		LRRK2										1	0	1
SPOCK1		SPOCK1										1	0	1
LINC00535		LINC00535										1	0	1
PLEKHO1		PLEKHO1										1	0	1
LOC100129794		LOC100129794										1	0	1
LOC729506		LOC729506										1	0	1
PPP2R2C		PPP2R2C										1	0	1
RBPMS2		RBPMS2										1	0	1
MPV17L		MPV17L										1	0	1
PRDM16		PRDM16										1	0	1
PRNP		PRNP										1	0	1
SMOC2		SMOC2										1	0	1
XKR4		XKR4										1	0	1
LOC729683		LOC729683										1	0	1
KLK13		KLK13										1	0	1
EGR3		EGR3										1	0	1
MYEF2		MYEF2										1	0	1
SHC4		SHC4										1	0	1
COX4I2		COX4I2										1	0	1
CASR		CASR										1	0	1
CLIC6		CLIC6										1	0	1
SBK1		SBK1										1	0	1
LDHB		LDHB										1	0	1
MARK1		MARK1										1	0	1
IRX2		IRX2										1	0	1
CMTM7		CMTM7										1	0	1
TWIST2		TWIST2										1	0	1
ADAM19		ADAM19										1	0	1
SDR42E1		SDR42E1										1	0	1
PCDH8		PCDH8										1	0	1
PIWIL1		PIWIL1										1	0	1
C5orf38		C5orf38										1	0	1
CNTFR		CNTFR										1	0	1
RNF212		RNF212										1	0	1
TMEM64		TMEM64										1	0	1
TRIM46		TRIM46										1	0	1
NPTXR		NPTXR										1	0	1
GPNMB		GPNMB										1	0	1
FAM46B		FAM46B										1	0	1
NPTX2		NPTX2										1	0	1
MSANTD1		MSANTD1										1	0	1
GBGT1		GBGT1										1	0	1
S1PR4		S1PR4										1	0	1
CNTLN		CNTLN										1	0	1
HIST1H1B		HIST1H1B										1	0	1
DOCK8		DOCK8										1	0	1
ELOVL2		ELOVL2										1	0	1
ACN9		ACN9										1	0	1
PHGDH		PHGDH										1	0	1
MSX2		MSX2										1	0	1
HSD17B7P2		HSD17B7P2										1	0	1
ALPK3		ALPK3										1	0	1
LINGO3		LINGO3										1	0	1
LIMD2		LIMD2										1	0	1
NDST3		NDST3										1	0	1
DPYSL4		DPYSL4										1	0	1
ZYG11A		ZYG11A										1	0	1
VENTX		VENTX										1	0	1
TMEM178B			TMEM178B									1	0	1
MIR3650			MIR3650									1	0	1
NCAM1			NCAM1									1	0	1
CCDC177			CCDC177									1	0	1
WNT1			WNT1									1	0	1
GSTM2			GSTM2									1	0	1
CCDC178			CCDC178									1	0	1
DIRAS1			DIRAS1									1	0	1
POM121L2			POM121L2									1	0	1
BAALC			BAALC									1	0	1
NTF3			NTF3									1	0	1
TSHZ2			TSHZ2									1	0	1
KCNK17			KCNK17									1	0	1
C8orf56			C8orf56									1	0	1
NEUROD2			NEUROD2									1	0	1
C9orf171			C9orf171									1	0	1
DAAM2			DAAM2									1	0	1
STOX2			STOX2									1	0	1
NRG2			NRG2									1	0	1
AJAP1			AJAP1									1	0	1
HLX			HLX									1	0	1
FBXL15			FBXL15									1	0	1
EFCC1			EFCC1									1	0	1
TSHZ3			TSHZ3									1	0	1
EVC2			EVC2									1	0	1
LOC100506834			LOC100506834									1	0	1
CACNA1H			CACNA1H									1	0	1
IGFBP5			IGFBP5									1	0	1
NUDT10			NUDT10									1	0	1
KCNT2			KCNT2									1	0	1
PCDHGC4			PCDHGC4									1	0	1
NGB			NGB									1	0	1
C15orf26			C15orf26									1	0	1
MDGA1			MDGA1									1	0	1
MSRB3			MSRB3									1	0	1
KCNQ2			KCNQ2									1	0	1
WDR72			WDR72									1	0	1
SYT10			SYT10									1	0	1
PAX3			PAX3									1	0	1
FBLIM1			FBLIM1									1	0	1
EDARADD			EDARADD									1	0	1
VAX2			VAX2									1	0	1
SLC22A17			SLC22A17									1	0	1
PTH2R			PTH2R									1	0	1
FRMPD4			FRMPD4									1	0	1
AASS			AASS									1	0	1
VAMP5			VAMP5									1	0	1
HOXC10			HOXC10									1	0	1
PRAF2			PRAF2									1	0	1
FOXF2			FOXF2									1	0	1
EFHC2			EFHC2									1	0	1
NLGN4Y			NLGN4Y									1	0	1
BVES			BVES									1	0	1
DRGX			DRGX									1	0	1
LDOC1			LDOC1									1	0	1
CBLN1			CBLN1									1	0	1
WTH3DI			WTH3DI									1	0	1
MX1			MX1									1	0	1
NTN1			NTN1									1	0	1
HLF			HLF									1	0	1
NRXN1			NRXN1									1	0	1
SLC6A17			SLC6A17									1	0	1
SYT9			SYT9									1	0	1
ASTN1			ASTN1									1	0	1
CIDEA			CIDEA									1	0	1
ZNF114			ZNF114									1	0	1
KCND3			KCND3									1	0	1
FHL1			FHL1									1	0	1
CXCL12			CXCL12									1	0	1
SLC7A5P1			SLC7A5P1									1	0	1
L3MBTL4			L3MBTL4									1	0	1
HBA2			HBA2									1	0	1
LOC643355			LOC643355									1	0	1
CXCL6			CXCL6									1	0	1
SLC37A2			SLC37A2									1	0	1
ZNF483			ZNF483									1	0	1
CCDC144B			CCDC144B									1	0	1
MEIS2			MEIS2									1	0	1
IQCA1			IQCA1									1	0	1
LOC100505666			LOC100505666									1	0	1
GAS7			GAS7									1	0	1
NGF			NGF									1	0	1
HFM1			HFM1									1	0	1
GRASP			GRASP									1	0	1
ALPL			ALPL									1	0	1
FLT4			FLT4									1	0	1
ZNF300			ZNF300									1	0	1
GOLGA8A			GOLGA8A									1	0	1
C2orf40			C2orf40									1	0	1
HIST2H2BE			HIST2H2BE									1	0	1
SNAP91			SNAP91									1	0	1
LECT1			LECT1									1	0	1
ZFYVE28			ZFYVE28									1	0	1
LTK			LTK									1	0	1
ARSG			ARSG									1	0	1
LOC100499489			LOC100499489									1	0	1
GALNT13			GALNT13									1	0	1
ZNF518B			ZNF518B									1	0	1
HPDL			HPDL									1	0	1
SHOX			SHOX									1	0	1
CRIP3			CRIP3									1	0	1
VLDLR			VLDLR									1	0	1
FAM135B			FAM135B									1	0	1
EPHB6			EPHB6									1	0	1
DNM1P35			DNM1P35									1	0	1
HSPA12B			HSPA12B									1	0	1
OR2L13			OR2L13									1	0	1
FLJ35024			FLJ35024									1	0	1
TRIM58			TRIM58									1	0	1
OVOL1			OVOL1									1	0	1
SLC34A2			SLC34A2									1	0	1
PRSS27			PRSS27									1	0	1
LRRC71			LRRC71									1	0	1
HTR4			HTR4									1	0	1
CDH15			CDH15									1	0	1
NR2F6			NR2F6									1	0	1
TRHDE-AS1			TRHDE-AS1									1	0	1
PEAR1			PEAR1									1	0	1
FLJ34208			FLJ34208									1	0	1
FLJ39639			FLJ39639									1	0	1
SLCO2A1			SLCO2A1									1	0	1
PF4V1			PF4V1									1	0	1
DIRC3			DIRC3									1	0	1
RIBC2			RIBC2									1	0	1
OLIG1				OLIG1								1	0	1
NSG1				NSG1								1	0	1
LOC100127983				LOC100127983								1	0	1
XKR5				XKR5								1	0	1
LOC100652791				LOC100652791								1	0	1
BCAT1				BCAT1								1	0	1
ST8SIA4				ST8SIA4								1	0	1
GPR88				GPR88								1	0	1
GREB1L				GREB1L								1	0	1
DYDC2				DYDC2								1	0	1
IGF2BP3				IGF2BP3								1	0	1
ST3GAL1				ST3GAL1								1	0	1
KY				KY								1	0	1
KIRREL				KIRREL								1	0	1
COL14A1				COL14A1								1	0	1
FIGN				FIGN								1	0	1
DZIP1				DZIP1								1	0	1
SLC35F1				SLC35F1								1	0	1
GUCY1A2				GUCY1A2								1	0	1
CSMD1				CSMD1								1	0	1
PIANP				PIANP								1	0	1
ISLR2				ISLR2								1	0	1
NTM				NTM								1	0	1
CRHR2				CRHR2								1	0	1
CADM2				CADM2								1	0	1
EPHA5				EPHA5								1	0	1
MCTP1				MCTP1								1	0	1
HIC2				HIC2								1	0	1
HSD17B14				HSD17B14								1	0	1
EBF4				EBF4								1	0	1
EGR4				EGR4								1	0	1
TUBB6				TUBB6								1	0	1
POU3F2				POU3F2								1	0	1
MAF				MAF								1	0	1
COL15A1				COL15A1								1	0	1
CAMKV				CAMKV								1	0	1
SEZ6				SEZ6								1	0	1
BNC1				BNC1								1	0	1
GNB4				GNB4								1	0	1
FAM19A2				FAM19A2								1	0	1
FAM162B				FAM162B								1	0	1
CALN1				CALN1								1	0	1
CDH2				CDH2								1	0	1
VSTM4				VSTM4								1	0	1
HIST2H3D				HIST2H3D								1	0	1
ZNF578				ZNF578								1	0	1
GDNF				GDNF								1	0	1
CRHBP				CRHBP								1	0	1
MGC12916				MGC12916								1	0	1
DACT2				DACT2								1	0	1
NOS1				NOS1								1	0	1
INCA1				INCA1								1	0	1
C12orf68				C12orf68								1	0	1
ADCY8				ADCY8								1	0	1
KCNA4				KCNA4								1	0	1
SCAMP5				SCAMP5								1	0	1
ZNF662				ZNF662								1	0	1
PRIMA1				PRIMA1								1	0	1
MTERF				MTERF								1	0	1
RIMS4				RIMS4								1	0	1
TP73				TP73								1	0	1
ADAT3				ADAT3								1	0	1
LIG4				LIG4								1	0	1
CHRM2				CHRM2								1	0	1
SRD5A2				SRD5A2								1	0	1
RGS9BP				RGS9BP								1	0	1
SLC5A8				SLC5A8								1	0	1
SST				SST								1	0	1
GRIK1				GRIK1								1	0	1
CHODL				CHODL								1	0	1
APCDD1L				APCDD1L								1	0	1
SOCS1				SOCS1								1	0	1
DPP6				DPP6								1	0	1
TCF21				TCF21								1	0	1
LINC00842				LINC00842								1	0	1
HCK					HCK							1	0	1
CSMD2					CSMD2							1	0	1
ST3GAL6					ST3GAL6							1	0	1
DKK2					DKK2							1	0	1
PDE1C					PDE1C							1	0	1
SLC30A3					SLC30A3							1	0	1
ZNF83					ZNF83							1	0	1
ZNF550					ZNF550							1	0	1
ARMCX4					ARMCX4							1	0	1
SHISA7					SHISA7							1	0	1
ZNF470					ZNF470							1	0	1
FAM69C					FAM69C							1	0	1
PSD2					PSD2							1	0	1
ANTXR1					ANTXR1							1	0	1
TMEM106A					TMEM106A							1	0	1
ZNF14					ZNF14							1	0	1
LOC344595					LOC344595							1	0	1
PHLDB1					PHLDB1							1	0	1
ZNF141					ZNF141							1	0	1
ATRNL1					ATRNL1							1	0	1
ADAMTS3					ADAMTS3							1	0	1
KCNH1					KCNH1							1	0	1
C20orf194					C20orf194							1	0	1
ZNF665					ZNF665							1	0	1
CBX6					CBX6							1	0	1
UCHL1					UCHL1							1	0	1
GALNT16					GALNT16							1	0	1
KIF26B					KIF26B							1	0	1
ZNF599					ZNF599							1	0	1
GRIA3					GRIA3							1	0	1
KCNH3					KCNH3							1	0	1
ZNF480					ZNF480							1	0	1
C16orf62					C16orf62							1	0	1
PRKACB					PRKACB							1	0	1
DOC2B					DOC2B							1	0	1
SMARCD3					SMARCD3							1	0	1
CAV2					CAV2							1	0	1
COL4A3					COL4A3							1	0	1
RAMP2-AS1					RAMP2-AS1							1	0	1
PTCHD1					PTCHD1							1	0	1
SCD5					SCD5							1	0	1
CREG2					CREG2							1	0	1
CYP11A1					CYP11A1							1	0	1
EFNB3					EFNB3							1	0	1
SYNGR1					SYNGR1							1	0	1
RECK					RECK							1	0	1
ZNF559					ZNF559							1	0	1
CD109					CD109							1	0	1
C20orf166-AS1					C20orf166-AS1							1	0	1
CMPK2					CMPK2							1	0	1
ACP5					ACP5							1	0	1
NFATC2					NFATC2							1	0	1
SLC9A5					SLC9A5							1	0	1
DLL3					DLL3							1	0	1
LPPR1					LPPR1							1	0	1
ZNF808					ZNF808							1	0	1
PLEKHO2					PLEKHO2							1	0	1
SPAG16					SPAG16							1	0	1
BEX4					BEX4							1	0	1
ERC2					ERC2							1	0	1
ARHGAP10					ARHGAP10							1	0	1
NRSN2					NRSN2							1	0	1
SYP					SYP							1	0	1
BNC2					BNC2							1	0	1
TSC22D3					TSC22D3							1	0	1
FNBP1					FNBP1							1	0	1
C3orf67					C3orf67							1	0	1
GPX3					GPX3							1	0	1
ZNF844					ZNF844							1	0	1
LINC00086					LINC00086							1	0	1
ALG10B					ALG10B							1	0	1
CCDC106					CCDC106							1	0	1
ZNF502					ZNF502							1	0	1
CTSA					CTSA							1	0	1
BMPR1B					BMPR1B							1	0	1
CDYL					CDYL							1	0	1
SETBP1					SETBP1							1	0	1
PTPRU					PTPRU							1	0	1
ROR1					ROR1							1	0	1
DCLK2					DCLK2							1	0	1
SNPH					SNPH							1	0	1
PRKAR2B					PRKAR2B							1	0	1
RGL3					RGL3							1	0	1
SSBP2					SSBP2							1	0	1
AIF1L					AIF1L							1	0	1
FICD					FICD							1	0	1
FAM57B					FAM57B							1	0	1
TNFRSF13C					TNFRSF13C							1	0	1
ZBTB10					ZBTB10							1	0	1
GGTA1P					GGTA1P							1	0	1
PTK7					PTK7							1	0	1
COL19A1					COL19A1							1	0	1
EEF1DP3					EEF1DP3							1	0	1
SRRM3					SRRM3							1	0	1
GGT7					GGT7							1	0	1
ZCCHC24					ZCCHC24							1	0	1
ANGPTL4					ANGPTL4							1	0	1
SH3GL2					SH3GL2							1	0	1
PLA2G7					PLA2G7							1	0	1
PAPSS2					PAPSS2							1	0	1
HCRTR1					HCRTR1							1	0	1
SLC4A4					SLC4A4							1	0	1
ATP12A					ATP12A							1	0	1
ABTB2					ABTB2							1	0	1
TTC23L					TTC23L							1	0	1
EPHA4					EPHA4							1	0	1
CTGF					CTGF							1	0	1
KLF9					KLF9							1	0	1
LRRC56					LRRC56							1	0	1
TMOD2					TMOD2							1	0	1
PJA1					PJA1							1	0	1
MAP1LC3B					MAP1LC3B							1	0	1
SCIN					SCIN							1	0	1
C20orf195					C20orf195							1	0	1
ERO1LB					ERO1LB							1	0	1
WIPF3					WIPF3							1	0	1
DPF3					DPF3							1	0	1
NDRG4						NDRG4						1	0	1
IGSF9B						IGSF9B						1	0	1
FEZ1						FEZ1						1	0	1
FAM43B						FAM43B						1	0	1
SNTG2						SNTG2						1	0	1
WTIP						WTIP						1	0	1
GAS1						GAS1						1	0	1
HS3ST2						HS3ST2						1	0	1
TRIM67						TRIM67						1	0	1
SLITRK4						SLITRK4						1	0	1
FRRS1L						FRRS1L						1	0	1
HBQ1						HBQ1						1	0	1
TEKT2						TEKT2						1	0	1
NRN1						NRN1						1	0	1
COLEC12						COLEC12						1	0	1
NT5C1A						NT5C1A						1	0	1
RNF165						RNF165						1	0	1
DGKK						DGKK						1	0	1
THBS4						THBS4						1	0	1
FOXE3						FOXE3						1	0	1
HIST1H3A						HIST1H3A						1	0	1
BOC							BOC					1	0	1
DYNLRB2							DYNLRB2					1	0	1
SCNN1B							SCNN1B					1	0	1
TMEM52							TMEM52					1	0	1
MACROD2							MACROD2					1	0	1
CAMK2N2								CAMK2N2				0	1	1
CENPV								CENPV				0	1	1
SLC15A1								SLC15A1				0	1	1
HOXD11								HOXD11				0	1	1
HOXA13								HOXA13				0	1	1
EVX1								EVX1				0	1	1
PTPRN2								PTPRN2				0	1	1
HOTTIP								HOTTIP				0	1	1
TENM4									TENM4			0	1	1
ZNF529									ZNF529			0	1	1
C1orf51									C1orf51			0	1	1
GRIA4									GRIA4			0	1	1
GLB1L3									GLB1L3			0	1	1
TRAPPC2P1									TRAPPC2P1			0	1	1
INSC									INSC			0	1	1
RAB11FIP4									RAB11FIP4			0	1	1
SFTA3									SFTA3			0	1	1
ADAP2									ADAP2			0	1	1
PEX5L									PEX5L			0	1	1
BEND5									BEND5			0	1	1
DST									DST			0	1	1
NKAIN4									NKAIN4			0	1	1
LMX1B									LMX1B			0	1	1
LIN28A									LIN28A			0	1	1
EMILIN3									EMILIN3			0	1	1
C20orf112									C20orf112			0	1	1
LINC00461									LINC00461			0	1	1
COL23A1									COL23A1			0	1	1
ERBB4									ERBB4			0	1	1
RGS7BP									RGS7BP			0	1	1
FBN2									FBN2			0	1	1
NXNL2									NXNL2			0	1	1
ZNF266									ZNF266			0	1	1
ADAM11									ADAM11			0	1	1
OGDHL									OGDHL			0	1	1
POU3F1									POU3F1			0	1	1
LOC441666									LOC441666			0	1	1
COL24A1									COL24A1			0	1	1
MYO1C									MYO1C			0	1	1
CNIH2									CNIH2			0	1	1
PFKP									PFKP			0	1	1
EPS15L1									EPS15L1			0	1	1
DUOXA1									DUOXA1			0	1	1
LINC00473									LINC00473			0	1	1
MAP10									MAP10			0	1	1
ALDH1A2									ALDH1A2			0	1	1
CYBA									CYBA			0	1	1
C16orf72									C16orf72			0	1	1
LPPR3									LPPR3			0	1	1
TMEM132D									TMEM132D			0	1	1
LOC729732									LOC729732			0	1	1
SH2D5									SH2D5			0	1	1
PRKAG2									PRKAG2			0	1	1
LHX4									LHX4			0	1	1
EPN1									EPN1			0	1	1
SPIRE1									SPIRE1			0	1	1
ADAMTS15									ADAMTS15			0	1	1
BCAR1									BCAR1			0	1	1
TGIF2-C20orf24									TGIF2-C20orf24			0	1	1
ZNF883									ZNF883			0	1	1
KLC2									KLC2			0	1	1
CPNE5									CPNE5			0	1	1
AMN									AMN			0	1	1
LOC100335030									LOC100335030			0	1	1
CPM									CPM			0	1	1
RAB9A									RAB9A			0	1	1
CYB5R2									CYB5R2			0	1	1
TCEA2									TCEA2			0	1	1
ZIC2									ZIC2			0	1	1
RXRA									RXRA			0	1	1
ABHD12B									ABHD12B			0	1	1
NDNF									NDNF			0	1	1
TMBIM1									TMBIM1			0	1	1
IQGAP2									IQGAP2			0	1	1
RBM24									RBM24			0	1	1
HOXD12									HOXD12			0	1	1
CTSZ									CTSZ			0	1	1
IQSEC2									IQSEC2			0	1	1
UQCRC1									UQCRC1			0	1	1
GALC									GALC			0	1	1
SH3D21									SH3D21			0	1	1
MEIOB									MEIOB			0	1	1
NACC2									NACC2			0	1	1
B4GALT1									B4GALT1			0	1	1
PLLP									PLLP			0	1	1
PLSCR2									PLSCR2			0	1	1
GALR1									GALR1			0	1	1
APOB									APOB			0	1	1
PLCXD1									PLCXD1			0	1	1
LAMA3									LAMA3			0	1	1
PRSS22									PRSS22			0	1	1
KBTBD11									KBTBD11			0	1	1
PPP1R3C										PPP1R3C		0	1	1
KCTD1										KCTD1		0	1	1
GPR64										GPR64		0	1	1
EPOR										EPOR		0	1	1
CHST6										CHST6		0	1	1
ANKK1										ANKK1		0	1	1
MBOAT2										MBOAT2		0	1	1
PIGH										PIGH		0	1	1
ASAP2										ASAP2		0	1	1
MT1DP										MT1DP		0	1	1
TMEM44-AS1										TMEM44-AS1		0	1	1
STEAP2										STEAP2		0	1	1
BARX2										BARX2		0	1	1
CKB										CKB		0	1	1
PCDH1										PCDH1		0	1	1
MTRF1L										MTRF1L		0	1	1
SOCS2										SOCS2		0	1	1
STBD1										STBD1		0	1	1
PRSS3										PRSS3		0	1	1
FFAR4										FFAR4		0	1	1
EPB41L4B										EPB41L4B		0	1	1
GNAQ										GNAQ		0	1	1
FAM189A2										FAM189A2		0	1	1
KLF4										KLF4		0	1	1
PKHD1L1										PKHD1L1		0	1	1
IRF6										IRF6		0	1	1
NEDD4L										NEDD4L		0	1	1
FRMD1										FRMD1		0	1	1
CRIP1										CRIP1		0	1	1
LOC100270746										LOC100270746		0	1	1
SFN										SFN		0	1	1
PHYH										PHYH		0	1	1
GCHFR										GCHFR		0	1	1
ARHGAP42										ARHGAP42		0	1	1
PLEKHA7										PLEKHA7		0	1	1
DSC2										DSC2		0	1	1
GNG12										GNG12		0	1	1
GNG12-AS1										GNG12-AS1		0	1	1
CA7										CA7		0	1	1
B3GNT5										B3GNT5		0	1	1
FAM189A1										FAM189A1		0	1	1
MT1E										MT1E		0	1	1
PNRC2										PNRC2		0	1	1
MAL2										MAL2		0	1	1
MIR4500HG											MIR4500HG	0	1	1
CD34											CD34	0	1	1
MAGI2											MAGI2	0	1	1
RNF144A											RNF144A	0	1	1
LOC339529											LOC339529	0	1	1
SCRN1											SCRN1	0	1	1
SCRT2											SCRT2	0	1	1
RAB6B											RAB6B	0	1	1
CDH7											CDH7	0	1	1
GLIPR1L2											GLIPR1L2	0	1	1
LANCL3											LANCL3	0	1	1
ATP5I											ATP5I	0	1	1
FAM43A											FAM43A	0	1	1
P2RY6											P2RY6	0	1	1
PNPLA4											PNPLA4	0	1	1
C15orf48											C15orf48	0	1	1
NBEA											NBEA	0	1	1
HSBP1L1											HSBP1L1	0	1	1
MAB21L1											MAB21L1	0	1	1
GNA14											GNA14	0	1	1
PTCHD3P1											PTCHD3P1	0	1	1
LOC285696											LOC285696	0	1	1

## Sheet: 1_IIa EpiG. inactivated genes
Total number of genes hypermethylated in LST #1	1158
Hypermethylated in LST #1 but silent in normal	162
Epigenetically inactivated in LST #1	275
Symbol	Chr	Start	End	Gene ID	Strand	CpG	Pos	1_N_Xprn	1_IIa_Xprn	1_IIa_FC
WNT3A	chr1	228194096	228196512	NM_033131	+	1	2669	0	0	#DIV/0!
ZSCAN18	chr19	58609338	58609988	NM_023926	-	1	7127	10.0685	2.8149	0.279574
MYH10	chr17	8533004	8534933	NM_005964	-	1	8729	8.26638	4.98313	0.602819
ADARB2	chr10	1778784	1780018	NM_018702	-	1	10524	0.156709	0.45647	2.91286
GRIN2C	chr17	72855621	72858012	NM_000835	-	1	17310	0.0783543	0.0760783	0.970952
AKR1B1	chr7	134143115	134144063	NM_001628	-	1	17430	6.46423	11.3737	1.75948
OLIG1	chr21	34442206	34444543	NM_138983	+	1	29187	0	0	#DIV/0!
ZNF568	chr19	37406931	37407463	NM_001204837	+	1	31	0.626834	0.722744	1.15301
ELMOD1	chr11	107461743	107462648	NM_001130037	+	1	4313	0	0	#DIV/0!
PCDHGC3	chr5	140855386	140856620	NM_032402	+	1	4378	7.48283	4.64077	0.620189
TRPC4	chr13	38443682	38444228	NM_001135956	-	1	5602	0.117531	0	0
ZNF829	chr19	37406931	37407463	NM_001171979	-	1	8315	1.56709	0.532548	0.339833
NTNG1	chr1	107682889	107684463	NM_001113228	+	1	10680	0.0391771	0.114117	2.91286
CHST11	chr12	104850253	104852395	NM_018413	+	1	12802	7.32613	19.9325	2.72074
ZNF625	chr19	12266998	12267686	NM_145233	-	1	14753	1.56709	0.304313	0.19419
SSTR2	chr17	71160922	71162350	NM_001050	+	1	15525	2.58569	0.532548	0.20596
ZNF804B	chr7	88388488	88389283	NM_181646	+	1	19698	0	0	#DIV/0!
RFTN1	chr3	16554327	16555413	NM_015150	-	1	21724	5.44562	19.476	3.57646
GPR12	chr13	27334226	27335205	NM_005288	-	1	22906	0.470126	0	0
SDC2	chr8	97505747	97507607	NM_002998	+	1	23304	8.54062	9.73802	1.1402
LOC643923	chr11	107461743	107462648	NR_028328	+	1	24284	0	0	#DIV/0!
ZNF625-ZNF20	chr19	12266998	12267686	NR_037802	-	1	25043	3.83936	2.8149	0.733168
ZNF331	chr19	54023868	54024560	NM_018555	+	1	27082	5.21056	1.90196	0.36502
RASSF2	chr20	4803013	4804146	NM_014737	-	1	37980	6.46423	19.8184	3.06586
CLSTN2	chr3	139653430	139655115	NM_022131	+	1	257	0.861897	0.989017	1.14749
SLC6A15	chr12	85305663	85305876	NM_018057	-	1	713	0.156709	0	0
ZNF304	chr19	57862441	57863236	NM_020657	+	1	1849	3.91771	2.8149	0.718505
FLI1	chr11	128562671	128565011	NM_001271010	+	1	2185	5.56315	13.656	2.45473
UST	chr6	149068179	149069775	NM_005715	+	1	2804	3.29088	0.989017	0.300533
LIFR	chr5	38556222	38557563	NM_001127671	-	1	3473	10.8129	8.63488	0.798573
PTPRZ1	chr7	121513046	121513911	NM_001206838	+	1	4248	0.0783543	0	0
ZNF43	chr19	22034394	22034943	NM_001256653	-	1	5346	6.50341	3.76587	0.579062
MMP16	chr8	89339965	89340481	NM_005941	-	1	5778	0.861897	0.45647	0.52961
TOX2	chr20	42543097	42545137	NM_032883	+	1	5902	1.21449	2.77686	2.28644
TLL1	chr4	166794545	166795341	NM_012464	+	1	5989	0.587657	0.380391	0.647302
MIR4500HG	chr13	88323569	88324640	NR_033829	-	1	7193	0	0	#DIV/0!
PRKCB	chr16	23846941	23848102	NM_002738	+	1	8608	8.89321	31.2682	3.51596
ZNF813	chr19	53970802	53971473	NM_001004301	+	1	8938	4.23113	2.35843	0.557399
FGF14-IT1	chr13	103046680	103047226	NR_036486	-	1	9653	0	0	#DIV/0!
LPPR4	chr1	99729982	99730335	NM_014839	+	1	10461	0.705189	0.342352	0.485476
TNFSF11	chr13	43148277	43149282	NM_003701	+	1	10623	1.60626	2.05411	1.27882
EYA4	chr6	133562086	133563586	NM_172105	+	1	13910	0.0391771	0	0
CLVS2	chr6	123317164	123317753	NM_001010852	+	1	18214	0.0783543	0	0
ZBTB8B	chr1	32930500	32931061	NM_001145720	+	1	18983	0	0	#DIV/0!
FLI1-AS1	chr11	128562671	128565011	NR_038908	-	1	19059	0.235063	0.228235	0.970952
DFNA5	chr7	24796541	24797487	NM_004403	-	1	19777	0.391771	0.380391	0.970952
CD38	chr4	15779998	15780729	NM_001775	+	1	20063	1.8805	8.44469	4.49065
C11orf96	chr11	43963626	43966048	NM_001145033	+	1	21017	0.861897	1.14117	1.32403
TMEM178B	chr7	140772358	140774560	NM_001195278	+	1	21176	1.05778	2.28235	2.15767
RORA	chr15	61520423	61521716	NM_134261	-	1	22240	11.1655	12.4388	1.11404
PHACTR3	chr20	58179808	58180787	NM_080672	+	1	22691	0.27424	0.0380391	0.138707
MAP1B	chr5	71402877	71404868	NM_005909	+	1	23010	30.7932	13.8082	0.448417
METTL24	chr6	110678854	110679108	NM_001123364	-	1	23434	0.509303	0.266274	0.52282
ELOVL4	chr6	80656744	80657593	NM_022726	-	1	23502	0.705189	0.152157	0.215767
SYT2	chr1	202678881	202679769	NM_177402	-	1	23744	6.62094	1.71176	0.258538
FGF14-AS2	chr13	103046680	103047226	NR_036487	+	1	25690	0.54848	0.228235	0.416122
GRID2	chr4	93226348	93227007	NM_001510	+	1	26812	0	0	#DIV/0!
TENM4	chr11	79148358	79152200	NM_001098816	-	1	27067	0.744366	1.48353	1.99301
SLITRK5	chr13	88323569	88324640	NM_015567	+	1	27769	1.91968	0.0760783	0.0396307
CD70	chr19	6590340	6591072	NM_001252	-	1	27785	0	0.114117	#DIV/0!
MIR3650	chr5	38556222	38557563	NR_037423	-	1	28115	0	0.0380391	#DIV/0!
ASTN2	chr9	120175253	120177496	NM_014010	-	1	29748	0.901074	0.570587	0.63323
ZNF660	chr3	44626325	44626794	NM_173658	+	1	30770	0.313417	0.532548	1.69917
PRMT8	chr12	3599966	3603008	NM_019854	+	1	39397	0	0.114117	#DIV/0!
SPOCK3	chr4	168155005	168155765	NM_001204356	-	1	1970	0.0391771	0	0
CCDC169	chr13	36871667	36872059	NM_001144981	-	1	4168	0.0391771	0	0
AUTS2	chr7	69062374	69065037	NM_015570	+	1	5889	44.7403	42.3376	0.946296
NDRG4	chr16	58497033	58498595	NM_020465	+	1	6437	0.666011	1.14117	1.71345
ST8SIA1	chr12	22486835	22488666	NM_003034	-	1	17986	0.861897	2.09215	2.42738
ZNF790-AS1	chr19	37288342	37288723	NR_040027	+	1	22263	0.430949	0.0380391	0.0882684
ADHFE1	chr8	67344497	67344989	NM_144650	+	1	34465	4.03525	0.989017	0.245095
CCDC169-SOHLH2	chr13	36871667	36872059	NM_001198910	-	1	36160	0	0	#DIV/0!
NPAS1	chr19	47522904	47525190	NM_002517	+	1	37302	0.0783543	0	0
CRH	chr8	67089249	67089962	NM_000756	-	1	44	0	0	#DIV/0!
JAM2	chr21	27011624	27012398	NM_001270407	+	1	356	4.19195	4.22234	1.00725
EMBP1	chr1	121260857	121261525	NR_003955	+	1	1082	0.470126	0.760783	1.61825
CD1D	chr1	158150620	158151503	NM_001766	+	1	9316	5.21056	2.09215	0.401522
RAB39A	chr11	107798958	107799980	NM_017516	+	1	16969	0.195886	0.950978	4.85476
AP3B2	chr15	83378007	83379068	NM_004644	-	1	20175	0.313417	0.228235	0.728214
TFPI2	chr7	93519366	93520184	NM_006528	-	1	20972	0.0783543	0.0760783	0.970952
LOC285084	chr2	175190866	175192123	NR_038897	+	1	26768	0	0	#DIV/0!
KIF5C	chr2	149632682	149633882	NM_004522	+	1	30839	6.81682	1.02706	0.150665
MPPED2	chr11	30606004	30608128	NM_001145399	-	1	34677	0.0391771	0.0760783	1.9419
CNPY1	chr7	155325811	155326357	NM_001103176	-	1	1770	0	0	#DIV/0!
GALNT14	chr2	31360321	31361821	NM_024572	-	1	3042	0	0.304313	#DIV/0!
AK5	chr1	77747314	77748224	NM_012093	+	1	4834	1.17531	0.570587	0.485476
ARHGAP20	chr11	110581839	110583883	NM_001258418	-	1	7247	2.50734	1.5596	0.622016
LMO1	chr11	8284102	8285032	NR_073006	-	1	11639	0	0	#DIV/0!
AGTR1	chr3	148415442	148415932	NM_000685	+	1	12313	2.2331	0.152157	0.068137
GPM6A	chr4	176923075	176923630	NM_001261447	-	1	15495	0.195886	0.304313	1.55352
LRRN1	chr3	3840513	3842772	NM_020873	+	1	25971	1.17531	2.32039	1.97427
ANO5	chr11	22214172	22215320	NM_001142649	+	1	36956	18.6875	6.20038	0.331793
DPY19L2	chr12	64061836	64062774	NM_173812	-	1	11782	0.744366	0.304313	0.408822
EMB	chr5	49736607	49737300	NM_198449	-	1	23537	15.2399	12.2866	0.806215
HCK	chr20	30639908	30640786	NM_001172130	+	1	12799	3.56512	6.61881	1.85655
CSMD2	chr1	34628783	34630976	NM_052896	-	1	39041	0.195886	0.684704	3.49543
KLHL14	chr18	30349690	30352302	NM_020805	-	1	870	0.27424	1.86392	6.79667
RGMA	chr15	93631428	93633173	NM_020211	-	1	2186	0.861897	1.90196	2.20671
NR3C1	chr5	142782071	142785071	NM_001204263	-	1	3124	41.0968	21.7584	0.529442
RSPO3	chr6	127439265	127441072	NM_032784	+	1	3601	0.666011	1.48353	2.22748
ZNF682	chr19	20149855	20150175	NM_033196	-	1	4614	1.25367	0.494509	0.394449
NGFR	chr17	47572345	47575316	NM_002507	+	1	6027	0.0391771	0.494509	12.6224
ADD2	chr2	70994447	70995385	NM_001185054	-	1	6554	0.195886	0.342352	1.74771
PREX1	chr20	47443734	47445181	NM_020820	-	1	7124	13.3986	19.1717	1.43088
NRCAM	chr7	108095401	108097206	NM_001193584	-	1	8318	1.21449	8.17841	6.73402
FGF5	chr4	81187494	81187913	NM_033143	+	1	9306	0	0	#DIV/0!
IGSF9B	chr11	133825337	133827457	NM_014987	-	1	11533	0.509303	1.97803	3.88381
VCAN	chr5	82768387	82769268	NM_001126336	+	1	11873	5.68069	8.29253	1.45978
NLGN4X	chrX	6144120	6145906	NM_181332	-	1	12137	1.99803	1.86392	0.932876
ZNF549	chr19	58038572	58039208	NM_153263	+	1	14933	2.89911	1.36941	0.472355
FBXL7	chr5	15500076	15500923	NM_012304	+	1	16931	5.05385	4.22234	0.835471
FAM150A	chr8	53477544	53478627	NM_207413	-	1	18203	0.430949	0.228235	0.52961
EMILIN2	chr18	2846565	2848175	NM_032048	+	1	18799	6.30752	6.42861	1.0192
PTPRM	chr18	7566557	7568830	NM_001105244	+	1	20266	7.67872	11.2976	1.47129
B3GAT1	chr11	134281380	134282919	NM_054025	-	1	21123	0.313417	0.190196	0.606845
TACR1	chr2	75426592	75428030	NM_015727	-	1	21623	0.54848	0.152157	0.277415
DPF1	chr19	38719089	38720627	NM_001135156	-	1	22695	0.0783543	0.190196	2.42738
ZNF793	chr19	37997790	37998125	NM_001013659	+	1	25175	2.62487	0.684704	0.260853
ZNF788	chr19	12203028	12203503	NR_027049	+	1	29128	0.470126	0.41843	0.89004
PDGFD	chr11	104034536	104035058	NM_033135	-	1	30124	8.38391	7.37959	0.880209
EPHB1	chr3	134514085	134515980	NM_004441	+	1	32758	0.0783543	0.190196	2.42738
ZNF773	chr19	58011124	58011743	NM_198542	+	1	32889	1.05778	0.722744	0.683263
ZNF529	chr19	37063892	37064749	NM_020951	-	1	35434	3.91771	2.24431	0.572862
MVB12A	chr19	17530650	17531535	NM_138401	+	1	37307	3.09499	3.61372	1.1676
EGFLAM	chr5	38257825	38259136	NM_001205301	+	1	87	0.352594	0.684704	1.9419
WASF3	chr13	27131568	27132677	NM_006646	+	1	250	5.40645	1.14117	0.211077
SNX32	chr11	65601069	65601551	NM_152760	+	1	1158	0.509303	0.41843	0.821575
ZEB1	chr10	31607227	31610094	NM_001174093	+	1	1522	10.3819	16.509	1.59016
KAL1	chrX	8698857	8700500	NM_000216	-	1	3864	1.3712	1.5596	1.1374
ST3GAL6	chr3	98451286	98452225	NM_001271145	+	1	3923	1.41038	1.36941	0.970952
DKK2	chr4	107956555	107957453	NM_014421	-	1	4793	0	0	#DIV/0!
ZNF134	chr19	58125530	58125902	NM_003435	+	1	5682	5.13221	5.36352	1.04507
MAGI2-AS3	chr7	79081565	79081879	NR_038345	+	1	6324	0.235063	0.228235	0.970952
HECW1	chr7	43152020	43153340	NM_015052	+	1	6572	0.0391771	0	0
SOX5	chr12	24714956	24716243	NM_001261414	-	1	7004	0.705189	2.66274	3.77593
LMO2	chr11	33890357	33891495	NM_001142316	-	1	7871	10.2252	21.2639	2.07955
PAX2	chr10	102503913	102506146	NM_003989	+	1	8008	0	0.380391	#DIV/0!
ZNF415	chr19	53635625	53636230	NM_018355	-	1	10041	3.33006	0.950978	0.285574
NBLA00301	chr4	174450046	174451469	NR_003679	+	1	10233	0.0391771	0.0380391	0.970952
TCF4	chr18	53257018	53257309	NM_001243227	-	1	10642	14.1429	27.7305	1.96073
VAT1L	chr16	77822375	77823134	NM_020927	+	1	11048	4.50537	3.6898	0.818977
BHLHE22	chr8	65492935	65494452	NM_152414	+	1	13123	0.117531	0.114117	0.970952
ZNF543	chr19	57831599	57832250	NM_213598	+	1	14495	2.19392	2.35843	1.07498
LPHN2	chr1	82265998	82269048	NM_012302	+	1	14841	14.1821	4.22234	0.297723
ZNF530	chr19	58111229	58111770	NM_020880	+	1	14912	0.861897	0.836861	0.970952
CCBE1	chr18	57363714	57365001	NM_133459	-	1	15278	0.82272	0.266274	0.323651
GLI3	chr7	42276003	42277850	NM_000168	-	1	15414	3.17335	4.10823	1.2946
UNC5C	chr4	96469456	96469667	NM_003728	-	1	17009	8.77568	3.15725	0.359772
RUNX1T1	chr8	93114056	93115979	NM_175634	-	1	17953	3.44759	4.10823	1.19162
SHISA3	chr4	42399152	42400802	NM_001080505	+	1	18945	0.156709	0.0760783	0.485476
NIM1	chr5	43191974	43193155	NR_072980	+	1	19378	0.156709	0.0760783	0.485476
TCF24	chr8	67873388	67875600	NM_001193502	-	1	20186	0	0	#DIV/0!
ANKLE1	chr19	17392383	17393775	NM_152363	+	1	21428	0.0391771	0.41843	10.6805
PDE1C	chr7	32110063	32110910	NM_001191056	-	1	21944	1.13614	0.989017	0.870509
PTPRO	chr12	15475318	15475901	NM_002848	+	1	23986	8.65815	1.78784	0.206492
CD40	chr20	44746822	44747060	NM_001250	+	1	24282	4.03525	4.45058	1.10293
HAND2	chr4	174450046	174451469	NM_021973	-	1	27086	0.313417	0.266274	0.849583
ZEB1-AS1	chr10	31607227	31610094	NR_024284	-	1	27605	1.80215	3.46156	1.9208
ZNF880	chr19	52873084	52873572	NM_001145434	+	1	27936	2.82075	0.950978	0.337136
VGLL3	chr3	87039610	87040516	NM_016206	-	1	28280	1.25367	1.90196	1.51711
MEIS1-AS3	chr2	66660452	66660794	NR_046438	-	1	28483	0.156709	0	0
PALM2	chr9	112402767	112403349	NM_001037293	+	1	30195	0.352594	0.0760783	0.215767
ABCC8	chr11	17497463	17498626	NM_000352	-	1	30734	1.60626	0.266274	0.165772
ST3GAL6-AS1	chr3	98451286	98452225	NR_046683	-	1	32286	0	0	#DIV/0!
PLXNA4	chr7	132260474	132262527	NM_001105543	-	1	34578	0.195886	0.152157	0.776762
TMEM163	chr2	135475698	135476993	NM_030923	-	1	36266	0.979429	2.47254	2.52448
FEV	chr2	219848919	219850541	NM_017521	-	1	36471	5.13221	0.266274	0.0518829
CLGN	chr4	141348042	141348957	NM_004362	-	1	36610	0.979429	0.114117	0.116514
ZNF781	chr19	38182793	38183327	NM_152605	-	1	36829	0.313417	0.152157	0.485476
CRLF1	chr19	18716229	18718743	NM_004750	-	1	40035	0.0391771	0	0
SLC26A5	chr7	103085710	103086132	NM_206884	-	1	2022	0.195886	0.0380391	0.19419
GPC5	chr13	92051153	92051716	NM_004466	+	1	8121	1.01861	0	0
KCNIP4	chr4	21950085	21950346	NM_147182	-	1	16103	1.76297	0.836861	0.474688
ZMAT4	chr8	40755164	40755404	NM_001135731	-	1	19253	0.117531	0.0380391	0.323651
ZFP82	chr19	36909281	36909854	NM_133466	-	1	23325	1.13614	0.836861	0.736584
SYNE1	chr6	152957810	152958472	NM_033071	-	1	27891	26.7188	17.2698	0.646352
BCAT1	chr12	25101607	25102073	NM_001178092	-	1	2345	1.17531	2.39647	2.039
ZNF610	chr19	52839444	52839937	NM_001161425	+	1	13366	0.705189	0.989017	1.40249
BMP3	chr4	81951941	81952808	NM_001201	+	1	38996	62.5267	7.49371	0.119848
NCAM1	chr11	112832524	112834490	NM_001242607	+	1	1750	3.2517	3.00509	0.924159
SELV	chr19	40005648	40005869	NM_182704	+	1	1890	0	0	#DIV/0!
APBB1	chr11	6439863	6440732	NR_047512	-	1	2570	0.901074	0.304313	0.337723
GJC1	chr17	42906810	42908061	NM_005497	-	1	3950	0.54848	1.59764	2.91286
ZNF790	chr19	37328896	37329518	NM_001242802	-	1	4101	0.979429	0.836861	0.854438
AGXT2L1	chr4	109683729	109684362	NM_001146627	-	1	4120	0	0	#DIV/0!
THEGL	chr4	57396748	57397269	NM_001256475	+	1	4679	0	0	#DIV/0!
SYT6	chr1	114695136	114696672	NM_001270805	-	1	5132	0.0391771	0	0
GPR101	chrX	136113583	136114232	NM_054021	-	1	5437	0	0	#DIV/0!
WDR17	chr4	176986921	176987360	NM_181265	+	1	7509	0.509303	0.342352	0.672198
ST8SIA4	chr5	100238722	100239138	NM_175052	-	1	9409	1.09696	2.24431	2.04594
DPP10	chr2	115918737	115920765	NM_001004360	+	1	9434	2.58569	0.0380391	0.0147114
CHST10	chr2	101033606	101034296	NM_004854	-	1	9757	0.352594	0.798822	2.26556
KAZN	chr1	14924610	14925993	NM_201628	+	1	10304	3.29088	2.92901	0.89004
LRFN5	chr14	42075858	42076329	NM_152447	+	1	10605	0.313417	0	0
LOC401463	chr8	65488536	65489116	NR_015374	-	1	11502	0	0.0760783	#DIV/0!
LHFPL3	chr7	103968783	103969959	NM_199000	+	1	12983	0.470126	0.41843	0.89004
CNTN4	chr3	2140029	2141784	NM_175607	+	1	13323	0.940251	2.96705	3.15559
NTRK3	chr15	88799522	88801017	NM_001012338	-	1	13345	0.54848	0.0760783	0.138707
PPM1E	chr17	56832961	56833986	NM_014906	+	1	14076	0.391771	0.608626	1.55352
ZDHHC22	chr14	77605885	77608304	NM_174976	-	1	15552	0.509303	0	0
VTN	chr17	26698359	26699557	NM_000638	-	1	15707	0.0391771	0.0380391	0.970952
KATNAL2	chr18	44526866	44527137	NM_031303	+	1	16683	1.29285	0.646665	0.500188
TBC1D30	chr12	65218245	65219143	NM_015279	+	1	20431	5.71986	6.84704	1.19706
ASCL1	chr12	103351579	103352695	NM_004316	+	1	20632	0.352594	0	0
SLFN11	chr17	33700487	33700760	NM_001104588	-	1	20838	5.44562	9.31959	1.71139
TMEFF2	chr2	193058995	193060812	NM_016192	-	1	21860	0.0391771	0	0
FSTL4	chr5	132946744	132948467	NM_015082	-	1	23603	0.27424	0.0380391	0.138707
ZNF264	chr19	57702696	57703425	NM_003417	+	1	24039	24.0156	13.656	0.568633
DPY19L2P4	chr7	89747892	89749036	NR_003551	+	1	24706	0.0391771	0.0380391	0.970952
ZNF606	chr19	58513455	58514498	NM_025027	-	1	26959	4.42702	1.48353	0.335107
HDGFRP3	chr15	83875648	83877079	NM_016073	-	1	28271	5.75904	1.67372	0.290625
B3GAT2	chr6	71665360	71667132	NM_080742	-	1	28975	5.71986	6.54273	1.14386
KIRREL3	chr11	126870226	126870552	NM_032531	-	1	29046	0.470126	0.190196	0.404563
LOC389023	chr2	115918737	115920765	NR_036580	-	1	29885	1.91968	0.0760783	0.0396307
KCNK10	chr14	88792904	88793324	NM_021161	-	1	30347	2.54651	2.58666	1.01577
VWC2	chr7	49813008	49815752	NM_198570	+	1	30518	0.195886	0.0760783	0.388381
ADAMTS1	chr21	28216558	28218117	NM_006988	-	1	30814	5.56315	2.32039	0.417099
LOC100288974	chr10	81664389	81665076	NR_033857	+	1	31451	0.0783543	0.570587	7.28214
TMEM59L	chr19	18722358	18724001	NM_012109	+	1	31959	0.156709	0.152157	0.970952
SARM1	chr17	26698359	26699557	NM_015077	+	1	32692	19.7845	17.4219	0.880586
PTX3	chr3	157155267	157155826	NM_002852	+	1	33204	0.313417	0.342352	1.09232
WNT1	chr12	49371690	49375550	NM_005430	+	1	34574	0.0783543	0.608626	7.76762
PDE4A	chr19	10529627	10532004	NM_001111307	+	1	35085	9.52005	21.1498	2.2216
GREB1L	chr18	18821383	18823349	NM_001142966	+	1	35835	0.27424	0.304313	1.10966
PIK3CD	chr1	9711780	9713001	NM_005026	+	1	37108	10.8912	13.8082	1.26783
ROR2	chr9	94711117	94713075	NM_004560	-	1	38019	1.8805	0.646665	0.343879
CACNA2D3	chr3	54155239	54157025	NM_018398	+	1	38139	0.195886	0.380391	1.9419
RPRM	chr2	154334449	154335458	NM_019845	-	1	38395	0	0	#DIV/0!
LOC100128398	chr19	58513455	58514498	NR_036508	+	1	39015	0.705189	0.380391	0.539418
GSX2	chr4	54966163	54968063	NM_133267	+	1	39524	0	0.0380391	#DIV/0!
HAND1	chr5	153857038	153859113	NM_004821	-	1	84	0	0	#DIV/0!
C1orf51	chr1	150254365	150254637	NM_144697	+	1	142	0.783543	0.646665	0.825309
GUCY1A3	chr4	156588297	156589292	NM_000856	+	1	1508	2.97746	4.64077	1.55863
CERKL	chr2	182521221	182521927	NR_027689	-	1	2722	3.40841	5.21136	1.52897
CNTN1	chr12	41086522	41087102	NM_001256063	+	1	2826	0.352594	0	0
ARMC4	chr10	28287447	28288057	NM_018076	-	1	3966	0	0.114117	#DIV/0!
BMP6	chr6	7726095	7728161	NM_001718	+	1	4978	9.20663	18.2968	1.98735
CNR1	chr6	88875397	88877449	NM_001160226	-	1	5005	0.940251	1.67372	1.78008
ZNF730	chr19	23299727	23300167	NM_001277403	+	1	5275	0.156709	0.380391	2.42738
ADAMTS19	chr5	128795503	128797417	NM_133638	+	1	6659	0	0.0380391	#DIV/0!
DPYSL5	chr2	27070302	27072922	NM_001253723	+	1	6984	0.0783543	0.0380391	0.485476
SPG20	chr13	36919737	36921004	NM_001142295	-	1	7389	10.2252	5.97214	0.584059
ZNF544	chr19	58739943	58740554	NM_014480	+	1	9555	5.91575	4.1843	0.707316
EFEMP1	chr2	56150340	56151180	NM_001039348	-	1	9720	4.9755	6.88508	1.3838
MOXD1	chr6	132722093	132722901	NM_015529	-	1	10410	2.46816	2.92901	1.18672
FLNC	chr7	128470443	128471161	NM_001127487	+	1	10470	3.76101	5.32548	1.41597
ZSCAN12	chr6	28367124	28367651	NR_028077	-	1	11289	3.01664	4.29842	1.4249
CR1	chr1	207669637	207670015	NM_000651	+	1	11300	1.80215	12.3627	6.85999
SYNDIG1	chr20	24449844	24452037	NM_024893	+	1	12482	0.313417	0.152157	0.485476
IGF2BP3	chr7	23508184	23509712	NM_006547	-	1	12691	0.430949	1.67372	3.88381
HYDIN	chr16	71264360	71264659	NM_017558	-	1	12940	1.44955	0.0380391	0.026242
ALX1	chr12	85673878	85674700	NM_006982	+	1	13688	0	0	#DIV/0!
FAM110B	chr8	58907001	58907822	NM_147189	+	1	14636	1.01861	0.41843	0.410788
LINC00643	chr14	62583679	62584279	NR_015358	+	1	15995	0	0	#DIV/0!
DMRTA1	chr9	22446681	22447695	NM_022160	+	1	17642	0.940251	0.570587	0.606845
DIRAS1	chr19	2720630	2721783	NM_145173	-	1	17658	0.235063	0.304313	1.2946
GPR37	chr7	124404700	124406189	NM_005302	-	1	20953	0.156709	0.114117	0.728214
SPG20OS	chr13	36919737	36921004	NR_045181	+	1	22067	0	0.152157	#DIV/0!
DOK5	chr20	53091733	53092993	NM_018431	+	1	25525	0.0391771	0	0
UCP1	chr4	141489962	141490378	NM_021833	-	1	27334	0	0	#DIV/0!
DOK6	chr18	67067509	67069168	NM_152721	+	1	27882	0.901074	0.760783	0.844306
GLB1L3	chr11	134145559	134147180	NM_001080407	+	1	28190	0	0	#DIV/0!
SLC30A3	chr2	27484873	27488189	NM_003459	-	1	29168	0	0.114117	#DIV/0!
HTR5A	chr7	154861797	154862074	NM_024012	+	1	30940	0	0	#DIV/0!
NPR1	chr1	153650830	153652375	NM_000906	+	1	35308	0.705189	0.646665	0.91701
POM121L2	chr6	27279794	27280635	NM_033482	-	1	3935	0	0	#DIV/0!
ZNF83	chr19	53193139	53193945	NM_001242538	-	1	788	5.21056	3.04313	0.584031
DNAH11	chr7	21582443	21583313	NM_001277115	+	1	1909	3.29088	6.9992	2.12685
FADS1	chr11	61582573	61584728	NM_013402	-	1	2170	3.17335	3.65176	1.15076
ADAM8	chr10	135089969	135090491	NM_001109	-	1	5791	2.42898	4.03215	1.66002
ZNF550	chr19	58070553	58071273	NM_001277092	-	1	6594	2.42898	1.52157	0.626421
ALOX15P1	chr17	6559363	6560803	NR_045985	+	1	6715	0	0	#DIV/0!
SOX21	chr13	95363152	95366051	NM_007084	-	1	12084	0	0	#DIV/0!
C16orf45	chr16	15528350	15529086	NM_033201	+	1	16725	1.3712	1.40745	1.02644
SUSD4	chr1	223536842	223538628	NM_017982	-	1	18148	0.235063	0.228235	0.970952
CADM1	chr11	115373574	115375881	NM_001098517	-	1	20514	6.15081	4.94509	0.803973
TMEM74	chr8	109799429	109799847	NM_153015	-	1	21400	0.156709	0	0
DACH2	chrX	85402943	85403877	NM_053281	+	1	22360	0	0	#DIV/0!
WNT7A	chr3	13919939	13922335	NM_004625	-	1	23453	0.0391771	0	0
MMP17	chr12	132312439	132315739	NM_016155	+	1	24766	0.391771	0.114117	0.291286
EGFL6	chrX	13587648	13588221	NM_001167890	+	1	26638	0.235063	0.0760783	0.323651
DMRT3	chr9	976162	977828	NM_021240	+	1	30731	0	0	#DIV/0!
ICAM1	chr19	10380287	10381965	NM_000201	+	1	36233	8.61897	28.1109	3.26152
MIR1908	chr11	61582573	61584728	NR_031729	-	1	39605	0	0	#DIV/0!
HIST1H4L	chr6	27841001	27841244	NM_003546	-	1	40788	0.156709	0.380391	2.42738
EGR2	chr10	64574660	64578778	NM_000399	-	1	424	4.38784	4.71685	1.07498
HLTF-AS1	chr3	148803904	148804557	NR_046648	+	1	504	0.156709	0.342352	2.18464
NELL2	chr12	45269830	45270835	NM_001145108	-	1	520	13.2027	1.52157	0.115247
PLCG2	chr16	81812710	81813707	NM_002661	+	1	946	5.79822	17.2317	2.9719
NTRK1	chr1	156828804	156831102	NM_001012331	+	1	1294	0.235063	0.152157	0.647302
MIR4787	chr3	50712068	50713007	NR_039950	+	1	1304	0	0	#DIV/0!
ZNF419	chr19	57999025	57999613	NM_001098494	+	1	1576	1.25367	1.52157	1.21369
SEZ6L	chr22	26565199	26565986	NM_001184776	+	1	1721	0.235063	0.114117	0.485476
PDE4DIP	chr1	145039740	145040180	NM_001198832	-	1	2103	50.4993	29.9748	0.593569
BDNF	chr11	27743472	27744564	NM_170731	-	1	2500	0.940251	0.380391	0.404563
LHX9	chr1	197880016	197881637	NM_001014434	+	1	2836	0	0	#DIV/0!
ZNF547	chr19	57874763	57875110	NM_173631	+	1	2894	1.05778	1.10313	1.04287
WNT5A	chr3	55520226	55522344	NM_003392	-	1	3082	3.56512	7.56979	2.12329
ULK4P2	chr15	30864782	30865586	NR_027470	+	1	3759	0.352594	0.760783	2.15767
ZNF347	chr19	53661430	53661848	NM_001172675	-	1	3783	3.05582	1.48353	0.485476
DYSF	chr2	71680558	71681276	NM_001130978	+	1	3922	2.03721	2.47254	1.21369
ZNF528	chr19	52900955	52901158	NM_032423	+	1	4161	5.01467	1.67372	0.333765
FAM133A	chrX	92928546	92928786	NM_001171110	+	1	4582	0	0	#DIV/0!
BAALC	chr8	104152726	104153390	NM_024812	+	1	5674	0.313417	0.304313	0.970952
CH25H	chr10	90967555	90967900	NM_003956	-	1	5878	4.50537	2.85294	0.63323
ATP1B2	chr17	7554139	7555338	NM_001678	+	1	5951	0.783543	0.989017	1.26224
ZNF542	chr19	56879417	56879995	NR_024057	+	1	6043	2.38981	2.01607	0.843614
VAV3	chr1	108507251	108507841	NM_006113	-	1	8118	118.472	47.3587	0.399747
NTF3	chr12	5539895	5540703	NM_001102654	+	1	8280	0.0783543	0.152157	1.9419
NTNG2	chr9	135036713	135038933	NM_032536	+	1	8848	0.0783543	0.0760783	0.970952
ZNF701	chr19	53073308	53074039	NM_001172655	+	1	9299	11.0871	5.0592	0.456313
FEZ1	chr11	125365137	125366319	NM_022549	-	1	9535	0.0391771	0.228235	5.82571
PXDN	chr2	1746833	1748971	NM_012293	-	1	9818	8.46226	14.7211	1.73962
NKX2-5	chr5	172661486	172662228	NM_004387	-	1	10739	0	0	#DIV/0!
DDN	chr12	49390617	49392441	NM_015086	-	1	10945	0.0391771	0.0760783	1.9419
KL	chr13	33589928	33591428	NM_004795	+	1	11890	1.25367	0.494509	0.394449
AMOTL1	chr11	94501366	94502696	NM_130847	+	1	12904	7.79625	7.07528	0.907523
FAM65B	chr6	24910626	24911285	NM_014722	-	1	13672	3.76101	14.4549	3.84335
ADCY1	chr7	45613386	45615504	NM_021116	+	1	14153	1.95886	0.532548	0.271867
COL12A1	chr6	75914705	75916387	NM_080645	-	1	14369	3.48677	9.54782	2.7383
SHISA7	chr19	55953371	55954641	NM_001145176	-	1	15653	0	0	#DIV/0!
VAV3-AS1	chr1	108507251	108507841	NR_046653	+	1	16068	0	0	#DIV/0!
MRC2	chr17	60704542	60705943	NM_006039	+	1	16677	2.46816	5.2494	2.12685
ZNF470	chr19	57078365	57079301	NM_001001668	+	1	17185	4.50537	5.32548	1.18203
C7orf57	chr7	48074838	48075985	NM_001100159	+	1	18109	0	0.152157	#DIV/0!
TRAPPC2P1	chr19	57874763	57875110	NR_002166	+	1	18175	3.91771	3.3094	0.844728
KIF26A	chr14	104601959	104605672	NM_015656	+	1	18532	1.09696	0.152157	0.138707
EPHA7	chr6	94126272	94129677	NM_004440	-	1	18947	3.21253	1.36941	0.426272
C8orf56	chr8	104152726	104153390	NR_027071	-	1	19026	0	0	#DIV/0!
HLTF	chr3	148803904	148804557	NM_003071	-	1	19726	6.46423	12.9333	2.00075
ZNF570	chr19	37959852	37960615	NM_144694	+	1	19996	1.95886	1.33137	0.679667
SPSB4	chr3	140769886	140771080	NM_080862	+	1	20659	0	0	#DIV/0!
DOCK3	chr3	50712068	50713007	NM_004947	+	1	20803	1.95886	0.912939	0.466057
TMEFF1	chr9	103235171	103236627	NM_003692	+	1	21025	0.235063	0.304313	1.2946
INSC	chr11	15136058	15136545	NM_001042536	+	1	21644	1.48873	3.08117	2.06966
WNT6	chr2	219723702	219725010	NM_006522	+	1	24077	0.156709	0	0
LAMP5	chr20	9495253	9495597	NM_001199897	+	1	24200	0.0783543	0.380391	4.85476
NEUROD2	chr17	37761691	37763551	NM_006160	-	1	24356	0	0	#DIV/0!
PCDH9	chr13	67804593	67805459	NM_020403	-	1	24421	2.50734	0.836861	0.333765
ZDBF2	chr2	207139336	207140031	NM_020923	+	1	24765	7.32613	9.31959	1.2721
EPHA6	chr3	96532023	96533625	NM_001080448	+	1	25427	0	0	#DIV/0!
KCND2	chr7	119912840	119913883	NM_012281	+	1	25958	0	0	#DIV/0!
HIF3A	chr19	46800053	46800603	NM_152795	+	1	26433	0.666011	0.266274	0.399804
ARRDC2	chr19	18117908	18118305	NM_015683	+	1	26697	10.0293	8.17841	0.815448
VIM	chr10	17270430	17272617	NM_003380	+	1	26726	77.1006	145.5	1.88714
INSRR	chr1	156828804	156831102	NM_014215	-	1	26952	0	0.0380391	#DIV/0!
TMEM196	chr7	19812569	19813005	NM_152774	-	1	27615	0.0783543	0	0
ADAMTS12	chr5	33892191	33892403	NM_030955	-	1	28522	0.705189	1.48353	2.10373
HOXC4	chr12	54447744	54448091	NM_153633	+	1	29020	0.509303	0.152157	0.298755
LINC00693	chr3	28616663	28617970	NR_038840	+	1	29139	0.0783543	0	0
ZNF229	chr19	44952416	44952809	NM_014518	-	1	29836	0.587657	0.152157	0.258921
VGLL2	chr6	117586482	117587156	NM_182645	+	1	31301	0	0	#DIV/0!
ROBO3	chr11	124735069	124736465	NM_022370	+	1	31537	1.44955	0.494509	0.341145
ITGA8	chr10	15761423	15762101	NM_003638	-	1	32982	2.07639	2.92901	1.41063
FGF9	chr13	22243259	22245362	NM_002010	+	1	33391	2.31145	0.304313	0.131655
NAP1L3	chrX	92928546	92928786	NM_004538	-	1	33649	0.705189	0.380391	0.539418
TUB	chr11	8102358	8102913	NM_177972	+	1	34181	2.11557	0.608626	0.28769
FAM69C	chr18	72123606	72124717	NM_001044369	-	1	34282	0	0	#DIV/0!
COL14A1	chr8	121137099	121137778	NM_021110	+	1	35174	8.30555	4.86901	0.586235
MIR9-1	chr1	156390403	156391581	NR_029691	-	1	35515	0	0	#DIV/0!
TUBB2B	chr6	3227025	3229688	NM_178012	-	1	35520	17.7472	13.2757	0.74804
C9orf171	chr9	135285310	135285897	NM_207417	+	1	35570	0	0.0380391	#DIV/0!
FAM126A	chr7	23052971	23054002	NM_032581	-	1	36110	5.09303	4.26038	0.836513
DLX4	chr17	48045788	48047207	NM_138281	+	1	36898	0.0391771	0.989017	25.2448
MED12L	chr3	150802996	150805168	NM_053002	+	1	38410	0.156709	1.0651	6.79667
RPS6KA2	chr6	167039962	167041679	NM_021135	-	1	38688	11.1263	15.4819	1.39147
ABHD8	chr19	17413733	17414486	NM_024527	-	1	38744	0.587657	1.71176	2.91286
ADAMTS8	chr11	130297401	130298517	NM_007037	-	1	39712	0.430949	0.266274	0.617879
WNT3	chr17	44895800	44897025	NM_030753	-	1	40726	0.313417	0.8749	2.79149
LRP1B	chr2	142887724	142888553	NM_018557	-	1	40834	0.156709	0	0
MYO5A	chr15	52820333	52821639	NM_000259	-	1	1292	14.3388	22.5192	1.5705
SLC26A4	chr7	107301205	107302416	NM_000441	+	1	3285	0.352594	0.0380391	0.107884
SNCA	chr4	90758008	90758870	NM_001146054	-	1	4053	0.235063	0.380391	1.61825
FAM78B	chr1	166134258	166136448	NM_001017961	-	1	4163	0.117531	0.570587	4.85476
C8orf34	chr8	69242920	69243803	NM_052958	+	1	4171	0.0391771	0	0
LOC286189	chr8	69242920	69243803	NR_038877	-	1	4754	0	0	#DIV/0!
MAGI2	chr7	79082174	79082427	NM_012301	-	1	5414	2.31145	1.25529	0.543075
SDK2	chr17	71639028	71641670	NM_001144952	-	1	6768	6.15081	4.07019	0.661732
LOC644248	chr4	90758008	90758870	NR_045481	+	1	8393	0	0	#DIV/0!
KCNK13	chr14	90526696	90528951	NM_022054	+	1	11962	0	0.190196	#DIV/0!
SLCO4C1	chr5	101632049	101632373	NM_180991	-	1	12390	5.28891	3.95607	0.747993
ZNF594	chr17	5094839	5095456	NM_032530	-	1	12466	2.11557	2.32039	1.09682
SFTA3	chr14	36983440	36983738	NM_001101341	-	1	12602	0	0	#DIV/0!
CCDC181	chr1	169396621	169396869	NM_021179	-	1	14147	0.195886	0.152157	0.776762
RRP15	chr1	218458019	218458684	NM_016052	+	1	14238	9.83346	13.9604	1.41968
CPNE8	chr12	39299248	39299629	NM_153634	-	1	14334	27.6199	5.62979	0.203831
ZNF274	chr19	58694501	58695107	NM_016324	+	1	16233	8.50144	6.84704	0.805398
ZNF814	chr19	58399945	58400276	NM_001144989	-	1	16579	5.83739	6.65685	1.14038
DAAM2	chr6	39760066	39760426	NM_015345	+	1	17097	8.77568	8.29253	0.944945
ACOT12	chr5	80689818	80690228	NM_130767	-	1	17235	0	0	#DIV/0!
NECAB1	chr8	91803656	91804141	NM_022351	+	1	17801	1.05778	0.228235	0.215767
SLC26A4-AS1	chr7	107301205	107302416	NR_028137	-	1	17871	0.235063	0.190196	0.809127
SMO	chr7	128828333	128829366	NM_005631	+	1	19451	1.17531	1.02706	0.873857
ST8SIA2	chr15	92936677	92938521	NM_006011	+	1	19858	0.54848	0.190196	0.346769
FOXI3	chr2	88751335	88752865	NM_001135649	-	1	22038	0	0	#DIV/0!
ADAP2	chr17	29248847	29249926	NM_018404	+	1	22449	3.6043	4.48862	1.24535
PPP1R3C	chr10	93392667	93393147	NM_005398	-	1	24724	0.744366	0.41843	0.56213
PSD2	chr5	139174904	139176172	NM_032289	+	1	24741	0.0783543	0.0760783	0.970952
ANTXR1	chr2	69240083	69241004	NM_053034	+	1	27389	1.72379	2.70078	1.56676
LOC100130950	chr17	5094839	5095456	NR_034082	+	1	28958	0.587657	2.73882	4.66057
PROCA1	chr17	27038084	27038919	NM_152465	-	1	30832	0.587657	0.152157	0.258921
CHSY3	chr5	129239553	129241612	NM_175856	+	1	33210	0.0391771	0.266274	6.79667
RIPPLY2	chr6	84562820	84563758	NM_001009994	+	1	35145	0	0	#DIV/0!
EVX2	chr2	176949511	176949795	NM_001080458	-	1	35187	0.430949	0	0
KCTD1	chr18	24235589	24237261	NM_001258222	-	1	36672	3.87854	8.40665	2.16748
TMEM106A	chr17	41363727	41364273	NM_145041	+	1	2524	6.22917	4.64077	0.745007
FBXO27	chr19	39522264	39523227	NM_178820	-	1	1320	0.27424	0.532548	1.9419
ZNF93	chr19	20011910	20012238	NM_031218	+	1	1706	5.40645	3.6898	0.682481
PIP4K2A	chr10	23002155	23003790	NM_005028	-	1	2003	11.4397	25.1439	2.19794
ZFP28	chr19	57049675	57050646	NM_020828	+	1	2247	2.82075	2.09215	0.7417
ITPRIPL1	chr2	96990857	96991283	NM_001163523	+	1	3687	0.195886	1.36941	6.99086
MEGF11	chr15	66544432	66546134	NM_032445	-	1	5213	0.940251	0.41843	0.44502
SHKBP1	chr19	41082615	41083355	NM_138392	+	1	5707	22.6444	35.4905	1.5673
PDE4B	chr1	66258440	66258918	NM_002600	+	1	6066	5.40645	7.72194	1.42828
NRG2	chr5	139422076	139423150	NM_013981	-	1	6556	0.235063	0.342352	1.45643
ZNF14	chr19	19843482	19843943	NM_021030	-	1	7205	2.89911	2.09215	0.721654
MAPK11	chr22	50708190	50710490	NM_002751	-	1	8600	0.509303	0.494509	0.970952
NOVA1	chr14	27066313	27066578	NM_002515	-	1	10245	1.91968	0.798822	0.416122
POU4F1	chr13	79175610	79177985	NM_006237	-	1	10317	0	0.114117	#DIV/0!
CORO2B	chr15	68870633	68871974	NM_006091	+	1	11358	0.470126	0.950978	2.02282
ELOVL5	chr6	53212617	53214043	NM_001242830	-	1	12558	4.1136	8.48273	2.06212
RAB3C	chr5	57878725	57879177	NM_138453	+	1	13440	0.391771	0.0380391	0.0970952
COLGALT2	chr1	184005359	184006766	NM_015101	-	1	14159	1.21449	2.16823	1.7853
GOLGA8B	chr15	34874861	34876425	NR_027410	-	1	14276	14.7306	13.2376	0.898647
KIRREL2	chr19	36347044	36348101	NM_199179	+	1	15042	0.0783543	0	0
PPP1R42	chr8	67940691	67940997	NM_001013626	-	1	15402	0	0	#DIV/0!
SLC1A2	chr11	35440375	35441882	NM_001195728	-	1	15622	0.391771	6.23842	15.9236
SYN2	chr3	12045652	12046627	NM_133625	+	1	15836	0.0783543	0.114117	1.45643
KCNA2	chr1	111148983	111150186	NM_004974	-	1	16662	0.313417	0.152157	0.485476
ZNF8	chr19	58789914	58790972	NM_021089	+	1	16673	2.07639	2.09215	1.00759
TTYH2	chr17	72208474	72208902	NM_032646	+	1	17383	2.03721	2.66274	1.30705
TLX1	chr10	102891010	102891794	NM_005521	+	1	19054	0.117531	1.33137	11.3278
ASIC2	chr17	31618345	31620465	NM_183377	-	1	20975	0.430949	0	0
DDIT4L	chr4	101111146	101111497	NM_145244	-	1	22799	0	0	#DIV/0!
MPP2	chr17	41984148	41985012	NM_005374	-	1	23238	1.80215	0.228235	0.126646
MGC16275	chr17	72208474	72208902	NR_026914	-	1	23932	1.09696	1.33137	1.21369
ZNF345	chr19	37341731	37342000	NM_001242475	+	1	24377	1.17531	0.912939	0.776762
TLX1NB	chr10	102891010	102891794	NM_001085398	-	1	25882	0.0391771	0.228235	5.82571
NPPB	chr1	11919115	11919555	NM_002521	-	1	25920	0	0	#DIV/0!
VASH1	chr14	77227569	77228691	NM_014909	+	1	26556	8.26638	6.92312	0.837504
LRP2	chr2	170218314	170219203	NM_004525	-	1	28112	0	0	#DIV/0!
BOC	chr3	112930437	112931506	NM_033254	+	1	28526	2.7424	2.54862	0.92934
FLJ30403	chr19	52097252	52098000	NR_034159	-	1	30559	0.861897	0.380391	0.441342
DRD2	chr11	113345068	113346328	NM_000795	-	1	30712	0.54848	0.342352	0.624184
HLX	chr1	221051966	221053673	NM_021958	+	1	33252	0.940251	2.70078	2.8724
ZNF329	chr19	58661737	58662287	NM_024620	-	1	33411	2.89911	1.40745	0.485476
LOC100505715	chr19	44405817	44406053	NR_038334	-	1	37566	0.626834	0.494509	0.788899
LEF1-AS1	chr4	109092578	109092839	NR_029373	+	1	39759	0.313417	2.01607	6.43256
NUDT11	chrX	51238706	51240104	NM_018159	-	1	40206	0.27424	0	0
CACNA1G	chr17	48636103	48639279	NM_198382	+	1	232	0	0	#DIV/0!
LOC344595	chr3	106959409	106959925	NR_028301	+	1	375	0.666011	0.760783	1.1423
SLFN13	chr17	33775294	33775794	NM_144682	-	1	515	8.97157	10.3466	1.15327
MME	chr3	154797398	154797988	NM_000902	+	1	624	1.84133	6.96116	3.78052
NUP210	chr3	13460970	13462146	NM_024923	-	1	668	10.0685	22.5192	2.23659
TMEM255A	chrX	119444859	119445272	NM_001104545	-	1	1889	0.783543	1.14117	1.45643
NKX1-2	chr10	126135809	126138896	NM_001146340	-	1	1992	0	0	#DIV/0!
PAX7	chr1	18956895	18959829	NM_013945	+	1	2376	0	0	#DIV/0!
ISLR2	chr15	74419870	74423044	NM_020851	+	1	2702	0	0.114117	#DIV/0!
GAS2	chr11	22688285	22688617	NM_001143830	+	1	2724	0.195886	0.41843	2.1361
CHFR	chr12	133463807	133464858	NM_018223	-	1	3019	13.9862	5.17332	0.369887
LOC100506421	chr2	105468851	105473488	NR_037883	-	1	3102	0	0	#DIV/0!
VAV2	chr9	136856230	136858681	NM_001134398	-	1	3202	14.7306	3.4996	0.237573
ENOX1	chr13	44359858	44361696	NM_001242863	-	1	3472	0.0783543	0.684704	8.73857
MYLK	chr3	123602588	123603540	NM_053026	-	1	3514	105.504	27.3882	0.259594
SGK1	chr6	134638797	134639021	NM_001143676	-	1	4407	22.1743	9.05331	0.40828
NRXN2	chr11	64409877	64411253	NM_138734	-	1	6203	0.391771	0.152157	0.388381
BEND5	chr1	49242371	49242810	NM_024603	-	1	6735	0.666011	0.760783	1.1423
FAM198A	chr3	43020702	43021354	NM_001129908	+	1	6939	0.391771	0.228235	0.582571
DST	chr6	56818873	56820308	NM_001144769	-	1	7447	426.365	250.488	0.587496
LOC100499484-C9ORF174	chr9	100000463	100000820	NR_036529	+	1	7499	1.52791	0.646665	0.423236
ZNF141	chr4	330162	332068	NM_003441	+	1	7862	3.36923	2.20627	0.654828
GFRA2	chr8	21644908	21647845	NM_001165038	-	1	8078	0.313417	0.380391	1.21369
PTH1R	chr3	46923265	46925182	NM_001184744	+	1	8681	0.313417	0.0380391	0.121369
EPHA5	chr4	66536065	66536674	NM_182472	-	1	8769	0	0	#DIV/0!
SYT5	chr19	55690182	55691623	NM_003180	-	1	8933	0.195886	0.0380391	0.19419
WIPF1	chr2	175546862	175547880	NM_001077269	-	1	9015	14.8481	52.0375	3.50465
IGF2BP1	chr17	47072820	47076042	NM_006546	+	1	9172	0	0.380391	#DIV/0!
ZNF548	chr19	57901091	57901517	NM_152909	+	1	9240	4.19195	2.89097	0.689648
S1PR2	chr19	10340776	10342254	NM_004230	-	1	9565	2.50734	12.2866	4.90027
MLF1	chr3	158288800	158289271	NM_001195433	+	1	10300	1.91968	1.67372	0.871876
RET	chr10	43571939	43573434	NM_020975	+	1	10483	2.15474	0.646665	0.300113
WNT2	chr7	116962841	116964803	NR_024047	-	1	10552	0	0.342352	#DIV/0!
RUNDC3A	chr17	42385810	42386393	NM_006695	+	1	10716	0.470126	0.0760783	0.161825
LOXL2	chr8	23260442	23261867	NM_002318	-	1	11027	1.76297	9.35763	5.30787
MAP6	chr11	75378416	75379882	NM_033063	-	1	11643	0.82272	0.228235	0.277415
MCTP1	chr5	94619459	94621121	NM_024717	-	1	11783	2.78158	2.01607	0.724795
KCNB2	chr8	73448659	73449725	NM_004770	+	1	11905	0.901074	0	0
IGDCC3	chr15	65669310	65670617	NM_004884	-	1	12010	0.0391771	0	0
BATF3	chr1	212872460	212874048	NM_018664	-	1	12153	0.313417	0.836861	2.67012
LOC283731	chr15	74419870	74423044	NR_027073	-	1	12213	0.156709	0	0
ZDHHC15	chrX	74742765	74743117	NM_144969	-	1	12589	0.391771	0.266274	0.679667
GPX7	chr1	53067880	53068608	NM_015696	+	1	13513	0.626834	2.35843	3.76244
KCNS3	chr2	18059038	18059245	NM_002252	+	1	14020	4.54455	6.80901	1.49828
DYNC1I1	chr7	95401691	95402432	NM_001135557	+	1	15323	0.0783543	0.152157	1.9419
ZNF569	chr19	37957726	37958390	NM_152484	-	1	15705	1.21449	1.21725	1.00227
RIMS1	chr6	72596036	72596404	NM_014989	+	1	16514	0	0.342352	#DIV/0!
CHRFAM7A	chr15	30685087	30685891	NM_148911	-	1	17376	5.68069	1.48353	0.261153
CHST9	chr18	24764951	24765507	NM_001256316	-	1	17711	0	0	#DIV/0!
NLGN1	chr3	173115404	173115775	NM_014932	+	1	17873	0.27424	0.0760783	0.277415
MDFIC	chr7	114562170	114563193	NM_001166345	+	1	18297	7.01271	8.44469	1.2042
CNTNAP2	chr7	145813030	145814084	NM_014141	+	1	18326	5.52398	4.26038	0.771253
RBM20	chr10	112402953	112404328	NM_001134363	+	1	19458	0.195886	0.152157	0.776762
MATK	chr19	3801392	3801819	NM_002378	-	1	20075	0.901074	0.266274	0.295507
EYA2	chr20	45523250	45524020	NM_005244	+	1	20216	1.48873	1.82588	1.22647
LOC100499484	chr9	100000463	100000820	NR_036526	+	1	21303	2.7424	0.532548	0.19419
ZNF577	chr19	52390841	52391368	NM_032679	-	1	21366	4.54455	1.36941	0.30133
POU3F3	chr2	105468851	105473488	NM_006236	+	1	21474	0	0	#DIV/0!
ZNF256	chr19	58458686	58459219	NM_005773	-	1	21979	1.64544	1.52157	0.924716
CDH11	chr16	65154656	65157664	NM_001797	-	1	22659	4.27031	8.0643	1.88846
HCN4	chr15	73659860	73662015	NM_005477	-	1	23033	1.01861	0.190196	0.186722
CDKN2A	chr9	21974578	21975306	NM_000077	-	1	24528	1.3712	0.950978	0.693537
MIR4322	chr19	10340776	10342254	NR_036206	+	1	28061	0	0	#DIV/0!
ZNF365	chr10	64133789	64134420	NM_199451	+	1	28158	0	0	#DIV/0!
MAST4	chr5	65891877	65893539	NM_198828	+	1	28370	18.2174	26.0188	1.42824
ADAMTS3	chr4	73433783	73434289	NM_014243	-	1	30120	0.235063	0.41843	1.78008
ZNF519	chr18	14132000	14132482	NR_033354	-	1	30409	0.0783543	0.114117	1.45643
PTPRD	chr9	10612635	10613333	NM_002839	-	1	30842	46.5424	27.0078	0.580283
NKX2-3	chr10	101292436	101292851	NM_145285	+	1	31009	2.78158	2.54862	0.916251
RFX4	chr12	106975195	106975714	NM_213594	+	1	31391	0	0.0380391	#DIV/0!
KCNH1	chr1	211306667	211307675	NM_002238	-	1	31519	1.09696	0.722744	0.65886
C20orf112	chr20	31170740	31173640	NM_001256798	-	1	31668	165.21	118.073	0.714687
ATCAY	chr19	3880718	3881278	NM_033064	+	1	32024	0.156709	0	0
C20orf194	chr20	3387965	3388901	NM_001009984	-	1	32272	3.6043	2.77686	0.77043
BEND6	chr6	56818873	56820308	NM_152731	+	1	33469	0.195886	0.266274	1.35933
LOC100302640	chr3	106959409	106959925	NR_028303	-	1	33613	0	0	#DIV/0!
ZNF385B	chr2	180725717	180726465	NM_152520	-	1	33854	0.117531	0.380391	3.23651
TRPC3	chr4	122871412	122873182	NM_001130698	-	1	34062	0.0783543	0.0380391	0.485476
ZNF665	chr19	53696029	53696650	NM_024733	-	1	35596	0.313417	0.380391	1.21369
ALOX15	chr17	4542715	4544934	NM_001140	-	1	35821	0.0391771	0.45647	11.6514
C15orf26	chr15	81426499	81426702	NM_173528	+	1	35884	0	0	#DIV/0!
LOC100144602	chr4	66536065	66536674	NR_034138	+	1	36065	0.117531	0	0
CACNA1G-AS1	chr17	48636103	48639279	NR_038439	-	1	36506	0.0783543	0	0
CDH6	chr5	31193952	31194419	NM_004932	+	1	37028	1.3712	3.23333	2.35803
G0S2	chr1	209848443	209849428	NM_015714	+	1	37459	2.35063	1.02706	0.436929
TBX21	chr17	45810589	45811388	NM_013351	+	1	37534	0.313417	0.41843	1.33506
FOXP2	chr7	113724924	113727795	NR_033766	+	1	38183	11.0871	6.27646	0.566103
CBX6	chr22	39267539	39269160	NM_014292	-	1	38623	5.17138	7.34155	1.41965
EOMES	chr3	27762351	27763995	NM_005442	-	1	38698	0.587657	0.989017	1.68298
MDGA1	chr6	37663761	37667102	NM_153487	-	1	39110	0.861897	1.25529	1.45643
NOG	chr17	54670780	54672347	NM_005450	+	1	39624	0	0	#DIV/0!
HEY2	chr6	126068722	126071320	NM_012259	+	1	39813	0.195886	0.45647	2.33029
MIR1258	chr2	180725717	180726465	NR_031659	-	1	39870	0	0	#DIV/0!
ZNF461	chr19	37157632	37158119	NM_153257	-	1	40115	1.99803	0.798822	0.399804
CAMK4	chr5	110559569	110560446	NM_001744	+	1	40524	1.41038	2.32039	1.64522
RAB38	chr11	87908243	87908614	NM_022337	-	1	40756	0.313417	0.608626	1.9419
ERBB4	chr2	213402180	213403867	NM_005235	-	1	4816	0.0783543	0.152157	1.9419
ANKRD45	chr1	173638662	173639045	NM_198493	-	1	5628	0	0.304313	#DIV/0!
RNF144A-AS1	chr2	7057530	7058433	NR_033997	-	1	5874	0.352594	0.0380391	0.107884
FLT3	chr13	28674227	28675170	NM_004119	-	1	6925	0.587657	1.02706	1.74771
CALCR	chr7	93204085	93204381	NM_001742	-	1	9025	0.156709	0.0760783	0.485476
LINGO2	chr9	29212171	29212819	NM_001258282	-	1	11818	0.0783543	0	0
RNF144A	chr2	7057530	7058433	NM_014746	+	1	17608	19.1576	12.0204	0.627446
LRAT	chr4	155663809	155664315	NM_004744	+	1	18586	0.195886	0.0760783	0.388381
MEGF10	chr5	126626053	126626901	NM_032446	+	1	19249	0.156709	0.304313	1.9419
TUBB6	chr18	12307554	12309043	NM_032525	+	1	36992	2.78158	3.38548	1.21711
PLXNC1	chr12	94541727	94544000	NM_005761	+	1	40935	13.2419	13.3898	1.01117
SEMA7A	chr15	74725323	74726487	NM_001146030	-	1	12145	2.62487	5.17332	1.97089
DNAI2	chr17	72270301	72270512	NM_023036	+	1	384	0	0.0760783	#DIV/0!
TRABD2B	chr1	48462131	48462976	NM_001194986	-	1	576	0.666011	0.0760783	0.11423
BANK1	chr4	102711829	102712199	NM_017935	+	1	583	3.56512	12.1345	3.40367
PAX3	chr2	223162946	223163912	NM_000438	-	1	723	0	0	#DIV/0!
SV2B	chr15	91642908	91643702	NM_014848	+	1	1027	0.195886	0.836861	4.27219
C9orf170	chr9	89763336	89763767	NM_001001709	+	1	1197	0	0	#DIV/0!
RFX8	chr2	102090370	102091130	NM_001145664	-	1	1411	0	0	#DIV/0!
TLE4	chr9	82185479	82188560	NM_007005	+	1	1647	10.4211	16.509	1.58419
POU3F2	chr6	99279317	99283842	NM_005604	+	1	2360	0	0	#DIV/0!
DUSP26	chr8	33456915	33457515	NM_024025	-	1	2630	0.705189	0.114117	0.161825
MAF	chr16	79632619	79635537	NM_001031804	-	1	2743	7.56119	10.1945	1.34827
HOXA1	chr7	27135342	27136736	NM_153620	-	1	2784	1.91968	0.836861	0.435938
GALNT16	chr14	69726250	69728393	NM_020692	+	1	2803	0.235063	0.608626	2.58921
RASSF5	chr1	206680236	206681444	NM_182663	+	1	3316	10.4995	17.7643	1.69192
EMX2OS	chr10	119301321	119305368	NR_002791	-	1	3990	0	0	#DIV/0!
FHL3	chr1	38470617	38471396	NM_001243878	-	1	5387	1.48873	4.1843	2.81065
STMN2	chr8	80523975	80525765	NM_007029	+	1	5969	4.19195	1.59764	0.381121
CR2	chr1	207627531	207628280	NM_001006658	+	1	6294	3.91771	62.8787	16.0498
EDARADD	chr1	236558459	236559336	NM_145861	+	1	6736	10.7345	16.1666	1.50604
RUNX2	chr6	45389420	45391646	NM_004348	+	1	8749	8.54062	17.3839	2.03544
EMX2	chr10	119301321	119305368	NM_001165924	+	1	8805	0	0	#DIV/0!
KIF26B	chr1	245316547	245320247	NM_018012	+	1	8979	0.117531	0.266274	2.26556
CMTM3	chr16	66638254	66639561	NR_037613	+	1	9637	1.76297	2.77686	1.5751
HOTAIRM1	chr7	27135342	27136736	NR_038366	+	1	10149	1.72379	0.41843	0.242738
MEIS1	chr2	66661118	66661657	NM_002398	+	1	10460	3.6043	1.5596	0.432707
THRB	chr3	24535844	24537436	NM_000461	-	1	11100	67.228	0.912939	0.0135798
TTC25	chr17	40086751	40087098	NM_031421	+	1	12207	0.27424	0.152157	0.55483
ZNF599	chr19	35263648	35264275	NM_001007248	-	1	12234	0.744366	0.646665	0.868747
CAMKV	chr3	49906737	49907482	NM_024046	-	1	12556	0	0	#DIV/0!
LOC643542	chr18	65183237	65184014	NR_033921	+	1	13874	0	0	#DIV/0!
GABRB2	chr5	160974692	160975384	NM_021911	-	1	14965	2.03721	0.266274	0.130705
FJX1	chr11	35639629	35641485	NM_014344	+	1	15184	0.0783543	1.0651	13.5933
KIAA1549	chr7	138666358	138666972	NM_001164665	-	1	15555	6.81682	26.7796	3.92845
BACH2	chr6	91004795	91006944	NM_001170794	-	1	16303	1.8805	24.4972	13.0269
RGS17	chr6	153450992	153452792	NM_012419	-	1	17020	0.313417	0.0380391	0.121369
CACNA2D1	chr7	82072021	82073520	NM_000722	-	1	17063	1.72379	0.380391	0.220671
HOPX	chr4	57521621	57522703	NM_001145459	-	1	17263	0.705189	2.09215	2.9668
VGF	chr7	100806279	100809064	NM_003378	-	1	17301	0	0	#DIV/0!
PLCL1	chr2	198669079	198670154	NM_006226	+	1	17440	0.82272	0.684704	0.832245
DSEL	chr18	65183237	65184014	NM_032160	-	1	17780	1.8805	1.14117	0.606845
LOC100287314	chr12	30948548	30949757	NR_040245	+	1	18328	0.117531	0.0380391	0.323651
SPAG17	chr1	118727816	118728097	NM_206996	-	1	19244	0	0	#DIV/0!
CYP4F22	chr19	15619223	15619613	NM_173483	+	1	20160	0.0391771	0	0
ZNF480	chr19	52800399	52800871	NM_144684	+	1	20349	15.5141	9.66194	0.622783
PTPRA	chr20	2852899	2854635	NM_080840	+	1	21267	27.6199	36.5176	1.32215
ZBTB16	chr11	113929633	113932190	NM_006006	+	1	21349	1.8805	0.45647	0.242738
PPP4R4	chr14	94640366	94641648	NM_020958	+	1	21516	0	0	#DIV/0!
THRB-AS1	chr3	24535844	24537436	NR_046244	+	1	21629	0.313417	0	0
FGF20	chr8	16859044	16859452	NM_019851	-	1	23409	0.0783543	0.0760783	0.970952
AASS	chr7	121783946	121784663	NM_005763	-	1	24552	2.97746	5.21136	1.75027
STK3	chr8	99952020	99954686	NM_001256312	-	1	25030	4.27031	6.1243	1.43416
ULK4P1	chr15	32726421	32727225	NR_026858	-	1	25245	0.352594	0.760783	2.15767
DPY19L2P2	chr7	102920309	102921514	NR_003561	-	1	25425	0.0783543	0.684704	8.73857
C1orf95	chr1	226736354	226737412	NM_001003665	+	1	26207	1.33202	1.14117	0.856723
C16orf62	chr16	19566486	19567388	NM_020314	+	1	27761	24.329	14.0364	0.576943
COMP	chr19	18899037	18902284	NM_000095	-	1	28098	0.0391771	0	0
PRKACB	chr1	84543146	84544261	NM_207578	+	1	28545	156.865	79.2736	0.505361
CAND2	chr3	12837992	12838359	NM_001162499	+	1	30762	1.01861	0.8749	0.858919
C14orf132	chr14	96505311	96506402	NM_001252507	+	1	31969	1.3712	2.47254	1.8032
ZNF850	chr19	37263381	37264083	NM_001267779	-	1	33275	2.85993	1.48353	0.518728
MCC	chr5	112823256	112824304	NM_001085377	-	1	33478	4.07442	4.67881	1.14834
ZNF525	chr19	53868810	53869485	NR_003699	+	1	33645	10.3036	3.08117	0.299039
PAPLN	chr14	73704054	73705106	NM_173462	+	1	33704	4.58373	3.23333	0.705393
HOXC8	chr12	54402682	54403347	NM_022658	+	1	35551	0	0	#DIV/0!
SYDE1	chr19	15217951	15218617	NM_033025	+	1	36245	1.21449	0.989017	0.814347
KCNK4	chr11	64058808	64060118	NM_033310	+	1	38428	0	0	#DIV/0!
PRAF2	chrX	48931423	48931954	NM_007213	-	1	38952	3.29088	4.10823	1.24837
DCPS	chr11	126173539	126174042	NM_014026	+	1	39659	7.40448	9.54782	1.28947
CGB7	chr19	49559222	49560497	NM_033142	-	1	458	0	0.114117	#DIV/0!
MAPT	chr17	43971410	43975040	NM_016835	+	1	660	0.352594	1.48353	4.20746
PDLIM3	chr4	186455983	186456864	NM_001257963	-	1	945	7.01271	8.59684	1.2259
SMARCD3	chr7	150974116	150974535	NM_003078	-	1	1398	0.666011	0.380391	0.571148
S1PR5	chr19	10627980	10628417	NM_030760	-	1	1852	0.156709	0.114117	0.728214
CAV2	chr7	116139774	116140352	NM_198212	+	1	2011	3.40841	2.6247	0.770066
HS6ST3	chr13	96742138	96744162	NM_153456	+	1	2737	0.156709	0	0
HECW2	chr2	197457392	197458522	NM_020760	-	1	3035	1.13614	2.47254	2.17627
NTRK2	chr9	87283178	87285704	NM_001018066	+	1	3072	15.3574	4.64077	0.302184
FREM2	chr13	39261236	39262299	NM_207361	+	1	3649	0.391771	1.90196	4.85476
FAM20C	chr7	191875	193799	NM_020223	+	1	4004	3.33006	2.47254	0.742493
MYH11	chr16	15950839	15951266	NM_001040114	-	1	4271	78.5893	70.03	0.891088
SPTBN4	chr19	40971476	40973393	NM_020971	+	1	4547	0.27424	0.304313	1.10966
IGFBP3	chr7	45960137	45961347	NM_001013398	-	1	5138	26.1703	17.0796	0.652631
LPAR3	chr1	85358359	85359187	NM_012152	-	1	5610	0.235063	0.608626	2.58921
COL4A3	chr2	228028679	228029733	NM_000091	+	1	6253	1.41038	1.40745	0.997923
HAP1	chr17	39889956	39891489	NM_177977	-	1	6418	0.0783543	0	0
SHD	chr19	4279042	4279809	NM_020209	+	1	7653	6.11163	4.26038	0.697094
FMNL3	chr12	50100442	50101587	NM_198900	-	1	8772	13.2027	23.4701	1.77768
LEF1	chr4	109087747	109090407	NM_001166119	-	1	9479	0.705189	5.66783	8.03733
CCDC13	chr3	42814567	42814893	NM_144719	-	1	9618	0.940251	0.114117	0.121369
RYR1	chr19	38924239	38924519	NM_000540	+	1	11197	0.509303	0.228235	0.448132
COL4A4	chr2	228028679	228029733	NM_000092	-	1	11330	1.09696	2.66274	2.42738
CNTN5	chr11	98891543	98891821	NM_001243270	+	1	11470	0	0	#DIV/0!
GATA2	chr3	128205495	128212274	NM_032638	-	1	11588	1.95886	8.25449	4.21393
EPB41L4A	chr5	111754477	111756222	NM_022140	-	1	12265	37.4925	16.547	0.441342
PDGFC	chr4	157892685	157893286	NM_016205	-	1	12405	2.89911	3.87999	1.33834
FAM69B	chr9	139606300	139607433	NM_152421	+	1	12734	1.68462	1.7498	1.03869
KCNK2	chr1	215256051	215256636	NM_001017425	+	1	12771	0.0783543	0	0
PTH2	chr19	49925626	49926012	NM_178449	-	1	13029	0	0	#DIV/0!
SCD5	chr4	83719009	83720241	NM_024906	-	1	13571	0.27424	0.722744	2.63544
FLT1	chr13	29067788	29069977	NM_001160031	-	1	13699	1.21449	3.65176	3.00682
GRM4	chr6	34111735	34113944	NR_046379	-	1	13780	0.0783543	0.190196	2.42738
CREG2	chr2	102003277	102004187	NM_153836	-	1	13819	0	0	#DIV/0!
ANO3	chr11	26353537	26353812	NM_031418	+	1	14254	0	0	#DIV/0!
ZNF426	chr19	9648934	9649410	NM_024106	-	1	14685	5.4848	2.35843	0.429993
BLVRB	chr19	40971476	40973393	NM_000713	-	1	14724	24.76	40.1693	1.62235
ABCB4	chr7	87104723	87105305	NM_000443	-	1	14973	0.979429	0.570587	0.582571
COL25A1	chr4	110222970	110224257	NM_001256074	-	1	15501	0	0.114117	#DIV/0!
SCRN1	chr7	30028518	30029822	NM_001145514	-	1	15799	21.6258	20.4651	0.946327
PAX6	chr11	31831620	31839038	NM_000280	-	1	16032	2.31145	1.0651	0.460791
EPHA8	chr1	22889595	22890096	NM_001006943	+	1	18609	0	0	#DIV/0!
PGBD5	chr1	230561103	230562702	NM_001258311	-	1	18969	3.29088	0.342352	0.104031
COLEC12	chr18	499315	500722	NM_130386	-	1	19346	3.36923	3.61372	1.07256
SCRT2	chr20	655880	656604	NM_033129	-	1	20771	0	0	#DIV/0!
NT5C1A	chr1	40136988	40138087	NM_032526	-	1	21209	0	0	#DIV/0!
WNT9B	chr17	44928287	44929690	NM_003396	+	1	21463	0.0391771	0	0
DKFZp686K1684	chr11	31831620	31839038	NR_033971	+	1	24193	0.0783543	0	0
NKAIN2	chr6	124124177	124125309	NM_153355	+	1	24763	0	0	#DIV/0!
SIX1	chr14	61114102	61116552	NM_005982	-	1	26299	0	0	#DIV/0!
PRDM6	chr5	122424337	122424539	NM_001136239	+	1	26532	0.27424	0.266274	0.970952
FLJ11235	chr5	111754477	111756222	NR_027706	+	1	27480	1.21449	0.152157	0.125284
RAB39B	chrX	154493303	154493907	NM_171998	-	1	27632	0.783543	2.58666	3.30124
RNF180	chr5	63461448	63462106	NM_178532	+	1	28274	0.391771	0.41843	1.06805
ADAMTS10	chr19	8674332	8674764	NM_030957	-	1	28467	0.470126	0.228235	0.485476
DLX2	chr2	172964762	172967857	NM_004405	-	1	28812	0	0	#DIV/0!
SV2C	chr5	75378974	75380796	NM_014979	+	1	28822	0.195886	0.0380391	0.19419
BSN	chr3	49591578	49592534	NM_003458	+	1	29803	1.99803	0.532548	0.266536
NEURL	chr10	105253191	105254428	NM_004210	+	1	30112	18.1782	5.32548	0.29296
EXO5	chr1	40974056	40974786	NM_022774	+	1	30654	3.2517	1.7498	0.538118
SIX4	chr14	61188116	61190772	NM_017420	-	1	31169	0.235063	0.836861	3.56016
ZNF287	chr17	16472074	16472800	NM_020653	-	1	31492	1.60626	1.0651	0.663089
GPR176	chr15	40211961	40213444	NM_007223	-	1	31663	0.783543	1.17921	1.50498
SYNGR1	chr22	39745983	39746634	NM_145731	+	1	35779	0.313417	0.380391	1.21369
RGAG4	chrX	71350941	71352137	NM_001024455	-	1	35920	0.940251	0.190196	0.202282
ZNF614	chr19	52531323	52531724	NM_025040	-	1	36677	7.67872	3.61372	0.470615
BNIP3	chr10	133794406	133794637	NM_004052	-	1	37011	2.03721	1.48353	0.728214
HS3ST6	chr16	1967799	1968970	NM_001009606	-	1	37278	4.74043	0	0
CYP2U1	chr4	108852495	108853387	NM_183075	+	1	37443	8.61897	11.1074	1.28872
BSN-AS2	chr3	49591578	49592534	NR_038866	-	1	38228	0	0	#DIV/0!
RPSAP58	chr19	23945713	23946128	NR_003662	+	1	38731	281.801	515.544	1.82946
RECK	chr9	36036798	36037564	NM_021111	+	1	39279	2.62487	2.05411	0.782559
PRRX2	chr9	132427457	132427679	NM_016307	+	1	39280	0.117531	0.0760783	0.647302
CNTNAP3B	chr9	43684674	43685278	NM_001201380	+	1	39920	0.509303	1.63568	3.21161
B3GALNT1	chr3	160822494	160823260	NM_033168	-	1	378	0.54848	0.114117	0.208061
GPR98	chr5	89854290	89854956	NR_003149	+	1	2761	5.4848	1.36941	0.249673
COL9A2	chr1	40781679	40781956	NM_001852	-	1	11377	4.74043	8.44469	1.78142
FERMT2	chr14	53417108	53418339	NM_001134999	-	1	105	3.09499	4.52666	1.46257
FN1	chr2	216300267	216300997	NM_212476	-	1	159	78.5893	24.3831	0.310259
ZNF559	chr19	9434784	9435144	NM_001202407	+	1	204	3.99607	2.20627	0.55211
DDX3X	chrX	41191974	41194398	NM_001356	+	1	229	155.925	132.072	0.847022
SEMA5B	chr3	122745183	122746986	NM_001256348	-	1	485	0.54848	0.8749	1.59514
TGFBR3L	chr19	7980970	7982983	NM_001195259	+	1	570	0.0783543	0.342352	4.36929
FAM184A	chr6	119399091	119400223	NM_024581	-	1	703	1.72379	0.41843	0.242738
ZNF669	chr1	247267179	247267884	NM_024804	-	1	1161	1.09696	1.17921	1.07498
MAGED4	chrX	51927745	51928136	NM_001272062	+	1	1210	5.05385	1.0651	0.210749
RPL13A	chr19	49990435	49990965	NM_012423	+	1	1219	132.38	288.793	2.18155
SHOX2	chr3	157822973	157823836	NM_006884	-	1	1316	0	0	#DIV/0!
CMPK2	chr2	7005163	7006340	NM_001256478	-	1	1450	0.54848	0.570587	1.04031
SCARNA17	chr18	47339411	47340956	NR_003003	+	1	1452	0.509303	0.722744	1.41908
ZNF615	chr19	52511228	52511582	NM_198480	-	1	1728	9.63758	2.47254	0.256552
FGF13	chrX	138285888	138287622	NM_001139501	-	1	1797	1.52791	0.0760783	0.0497924
LRGUK	chr7	133812005	133812233	NM_144648	+	1	1859	0.509303	0.798822	1.56846
CCDC39	chr3	180397104	180397877	NM_181426	-	1	1943	0.509303	0.228235	0.448132
ZNF655	chr7	99155871	99156969	NM_024061	+	1	2004	18.9226	6.50469	0.343753
NOL4	chr18	31802358	31803792	NM_001198546	-	1	2116	2.2331	0.342352	0.153308
MYOCD	chr17	12568667	12569335	NM_001146312	+	1	2358	5.95493	8.10234	1.36061
KCNH4	chr17	40332597	40333471	NM_012285	-	1	2454	0.156709	0.228235	1.45643
ST8SIA6	chr10	17495407	17496721	NM_001004470	-	1	2585	1.80215	0.570587	0.316615
SLC38A3	chr3	50242550	50243589	NM_006841	+	1	2603	0.313417	0.0380391	0.121369
NFATC2	chr20	50158904	50159509	NM_012340	-	1	2614	25.2693	33.3223	1.31869
DLL3	chr19	39989397	39990140	NM_203486	+	1	3153	0	0.0760783	#DIV/0!
C11orf95	chr11	63535652	63537435	NM_001144936	-	1	3185	3.83936	2.66274	0.693537
ACHE	chr7	100492217	100494941	NM_000665	-	1	3210	11.3614	1.90196	0.167406
LRIF1	chr1	111505881	111507007	NM_018372	-	1	3716	6.93435	10.4227	1.50306
ZNF114	chr19	48775008	48775341	NM_153608	+	1	3948	0.0783543	0.304313	3.88381
FAM156A	chrX	53024599	53024966	NM_001242492	-	1	3969	16.2585	10.3466	0.636383
LRFN2	chr6	40554595	40555928	NM_020737	-	1	4005	0.313417	0	0
FOXN4	chr12	109746826	109748378	NM_213596	-	1	4133	0	0	#DIV/0!
ALDH5A1	chr6	24494664	24495670	NM_170740	+	1	4206	19.0401	24.9156	1.30859
ZNF211	chr19	58144339	58144999	NM_001265599	+	1	4208	5.01467	3.65176	0.728214
ZNF10	chr12	133706528	133707594	NM_015394	+	1	4636	2.07639	2.09215	1.00759
MAPK4	chr18	48085838	48087589	NM_002747	+	1	4874	0.705189	0.114117	0.161825
ST6GAL2	chr2	107502353	107504216	NM_001142351	-	1	5009	7.48283	0	0
SLC7A3	chrX	70150675	70151002	NM_032803	-	1	5114	0	0.152157	#DIV/0!
FBXO21	chr12	117627650	117628488	NM_015002	-	1	5312	20.9206	25.4862	1.21824
MOSPD3	chr7	100209594	100210655	NM_023948	+	1	5429	6.3467	12.1345	1.91194
FARP1	chr13	98794398	98796241	NM_005766	+	1	5487	22.7227	10.5368	0.463713
TSHR	chr14	81421294	81421561	NM_001142626	+	1	6349	0.430949	0.190196	0.441342
MRPL36	chr5	1799461	1801905	NM_032479	-	1	6822	8.46226	13.7702	1.62724
SLC12A5	chr20	44651066	44651369	NM_001134771	+	1	7025	0.0783543	0.190196	2.42738
PCSK1N	chrX	48693328	48694090	NM_013271	-	1	7385	16.141	0.798822	0.0494903
ESX1	chrX	103498706	103499843	NM_153448	-	1	7468	0	0	#DIV/0!
IGFBPL1	chr9	38423947	38424584	NM_001007563	-	1	7736	0.979429	0.8749	0.893276
ZNF416	chr19	58089801	58090524	NM_017879	-	1	8148	1.91968	3.3094	1.72394
NGFRAP1	chrX	102631321	102632073	NM_206917	+	1	8172	9.55922	10.8792	1.13808
SPTSSB	chr3	161089626	161090649	NM_001040100	-	1	8314	1.33202	0.570587	0.428361
PROK2	chr3	71834068	71834653	NM_001126128	-	1	8426	0	0	#DIV/0!
ZNF583	chr19	56915356	56915856	NM_001159861	+	1	9023	0.901074	1.40745	1.56197
SNCAIP	chr5	121647450	121648147	NM_001242935	+	1	9122	0.470126	0.989017	2.10373
HDAC9	chr7	18125914	18127009	NM_001204144	+	1	9475	11.6356	7.68391	0.660378
SLC39A3	chr19	2739851	2740393	NM_144564	-	1	9873	3.36923	5.32548	1.58062
PPP1R1A	chr12	54981933	54982591	NM_006741	-	1	10335	0.0783543	0	0
ZNF559-ZNF177	chr19	9434784	9435144	NM_001172650	+	1	10357	1.13614	0.722744	0.636141
L3MBTL4	chr18	6413959	6414873	NM_173464	-	1	10390	1.41038	1.36941	0.970952
SLC24A4	chr14	92788913	92789204	NM_153648	+	1	11012	0.352594	0.646665	1.83402
ZNF808	chr19	53030824	53031359	NM_001039886	+	1	11460	8.85403	4.52666	0.511254
EML6	chr2	54950394	54952488	NM_001039753	+	1	11577	2.78158	5.70587	2.05131
BLVRA	chr7	43797823	43798802	NM_001253823	+	1	12891	1.13614	5.89607	5.18957
PLEKHO2	chr15	65133371	65134329	NM_001195059	+	1	13586	4.23113	7.79802	1.84301
SCNN1G	chr16	23193716	23194773	NM_001039	+	1	13589	5.95493	0.190196	0.0319392
IL12RB2	chr1	67773329	67773767	NM_001559	+	1	14742	1.13614	1.21725	1.0714
SCN4B	chr11	118023352	118024194	NM_174934	-	1	14908	2.35063	2.32039	0.987135
RBM11	chr21	15588439	15588908	NM_144770	+	1	15640	0.313417	0.570587	1.82054
FAM150B	chr2	287353	290099	NM_001002919	-	1	15709	0.82272	0.570587	0.693537
POPDC3	chr6	105627406	105627830	NM_022361	-	1	15767	0	1.29333	#DIV/0!
LOC642366	chr5	50678632	50679375	NR_046243	-	1	15783	1.95886	0.0760783	0.0388381
JAK3	chr19	17958490	17958808	NM_000215	-	1	15934	4.85797	13.8082	2.84238
FBLN5	chr14	92413581	92414324	NM_006329	-	1	16242	3.29088	5.62979	1.71073
BMPER	chr7	33943665	33945509	NM_133468	+	1	16355	0.744366	0.190196	0.255514
SPAG16	chr2	214148957	214149426	NM_024532	+	1	16405	3.33006	1.71176	0.514034
DTNA	chr18	32073444	32074292	NM_032975	+	1	17111	1.56709	1.67372	1.06805
HOXA7	chr7	27195601	27196567	NM_006896	-	1	17490	12.0274	14.6451	1.21764
IRS4	chrX	107978210	107980145	NM_003604	-	1	17742	0	0	#DIV/0!
GNG4	chr1	235811841	235814066	NM_001098721	-	1	18105	2.7424	0.494509	0.18032
ATP6AP2	chrX	40439739	40440705	NM_005765	+	1	18116	29.9313	22.4431	0.749819
ZFP30	chr19	38145826	38147219	NM_014898	-	1	18624	1.72379	0.532548	0.308939
ARNTL	chr11	13298796	13300735	NM_001178	+	1	19225	4.34866	3.27137	0.752269
TSPAN7	chrX	38420557	38421478	NM_004615	+	1	19808	56.9636	19.6282	0.344575
NHLH2	chr1	116380359	116382364	NM_001111061	-	1	20046	0	0	#DIV/0!
RAB33A	chrX	129304946	129306427	NM_004794	+	1	20079	0.0783543	0.304313	3.88381
LINC00340	chr6	21665715	21666031	NR_015410	+	1	20182	0.0783543	0.342352	4.36929
S1PR1	chr1	101701785	101702068	NM_001400	+	1	20509	3.56512	5.85803	1.64315
PURA	chr5	139492723	139492966	NM_005859	+	1	20947	49.2848	31.5344	0.639841
SLC37A2	chr11	124932730	124933657	NM_001145290	+	1	21160	11.0088	70.5246	6.40621
MAGED4B	chrX	51927745	51928136	NM_030801	+	1	21471	5.05385	1.0651	0.210749
GCC1	chr7	127225200	127225950	NM_024523	-	1	21754	18.0215	12.0584	0.669113
NDUFS6	chr5	1799461	1801905	NM_004553	+	1	22515	19.7061	13.0474	0.662101
CXXC1	chr18	47813434	47814546	NM_001101654	-	1	22736	16.4936	13.618	0.825655
NR4A3	chr9	102581791	102587561	NM_173199	+	1	22811	0.940251	0.45647	0.485476
EID2B	chr19	40022952	40023667	NM_152361	-	1	22938	0.313417	0.0760783	0.242738
PLXND1	chr3	129323915	129325332	NM_015103	-	1	23184	11.714	22.6333	1.93216
NRK	chrX	105066349	105067110	NM_198465	+	1	23190	0.117531	0.0380391	0.323651
LOC283856	chr16	56224731	56224980	NR_027078	-	1	23368	0	0	#DIV/0!
ZNF681	chr19	23941240	23941538	NM_138286	-	1	23438	4.93632	2.01607	0.408416
CAV1	chr7	116164703	116166735	NM_001753	+	1	23544	8.97157	16.9655	1.89102
ARHGAP10	chr4	148652848	148653918	NM_024605	+	1	23576	1.80215	0.989017	0.548799
KEAP1	chr19	10613046	10614280	NM_203500	-	1	23877	18.0998	26.0948	1.44172
NRSN2	chr20	327376	328977	NM_024958	+	1	23963	10.4211	6.23842	0.598632
ZNF468	chr19	53360201	53360460	NR_102299	-	1	24911	19.7061	20.5411	1.04237
PAX5	chr9	37034135	37038341	NM_016734	-	1	25352	0.940251	8.67292	9.22405
PRKG1-AS1	chr10	54073989	54074827	NR_038277	-	1	25892	1.25367	0.41843	0.333765
CKM	chr19	45826801	45827164	NM_001824	-	1	26811	0.0783543	0	0
RPL13AP5	chr19	49990435	49990965	NR_026712	+	1	27433	44.5052	88.2508	1.98293
RRAGD	chr6	90120874	90122370	NM_021244	-	1	27911	4.46619	4.03215	0.902815
GPR180	chr13	95253814	95254569	NM_180989	+	1	27998	7.87461	8.78704	1.11587
MIR31HG	chr9	21559133	21559816	NR_027054	-	1	28457	0	0.0760783	#DIV/0!
RUNDC3B	chr7	87256958	87258444	NM_001134405	+	1	28647	4.9755	2.13019	0.428136
DPYSL3	chr5	146832560	146833938	NM_001387	-	1	28760	7.95296	19.2858	2.42499
ZNF433	chr19	12146030	12146649	NM_001080411	-	1	28818	0.587657	0.45647	0.776762
LMNA	chr1	156051239	156051461	NR_047544	+	1	29569	52.7716	37.2403	0.705688
PDGFRA	chr4	55094321	55094593	NM_006206	+	1	30415	27.8941	22.8615	0.819582
UBE2E2	chr3	23244050	23245071	NM_152653	+	1	31403	1.33202	2.54862	1.91335
SLC5A5	chr19	17982670	17983821	NM_000453	+	1	31465	0	0	#DIV/0!
CACNB4	chr2	152954633	152955784	NM_001145798	-	1	31556	0.391771	0.0760783	0.19419
LOC100130451	chr2	214148957	214149426	NM_001242575	-	1	31926	0	0.0380391	#DIV/0!
RIMKLB	chr12	8849963	8851403	NM_020734	+	1	32154	4.42702	0.950978	0.214812
ISL1	chr5	50678632	50679375	NM_002202	+	1	32224	2.58569	0.114117	0.0441342
CRABP1	chr15	78632669	78633108	NM_004378	+	1	32878	0.235063	0.0760783	0.323651
PAK3	chrX	110339364	110339679	NM_002578	+	1	33416	0.313417	0.266274	0.849583
PABPC1L2A	chrX	72298626	72299108	NM_001012977	-	1	34111	0	0	#DIV/0!
FNBP1	chr9	132804279	132806003	NM_015033	-	1	34177	32.5954	31.1541	0.955781
BAI3	chr6	69345216	69345483	NM_001704	+	1	34335	0.391771	0	0
A4GALT	chr22	43116151	43117121	NM_017436	-	1	34345	0.626834	1.14117	1.82054
SCG3	chr15	51973533	51973838	NM_013243	+	1	34431	3.40841	0.570587	0.167406
WNT16	chr7	120969587	120970743	NM_057168	+	1	34833	0.27424	0.342352	1.24837
GNAO1	chr16	56224731	56224980	NM_138736	+	1	35131	4.46619	3.00509	0.672853
FAM129A	chr1	184942862	184943777	NM_052966	-	1	35820	7.56119	13.5039	1.78595
GPX3	chr5	150400000	150400490	NM_002084	+	1	35837	17.8648	15.596	0.873005
KISS1R	chr19	917034	920787	NM_032551	+	1	36251	0	0.0380391	#DIV/0!
AKAP12	chr6	151646668	151646958	NM_144497	+	1	36428	12.1841	9.89017	0.811729
DIRAS2	chr9	93404976	93405313	NM_017594	-	1	37223	0	0.0760783	#DIV/0!
ZNF844	chr19	12175460	12176057	NM_001136501	+	1	37251	9.79429	5.09724	0.52043
MEX3A	chr1	156051239	156051461	NM_001093725	-	1	37684	1.64544	2.54862	1.5489
LHFP	chr13	40176849	40177576	NM_005780	-	1	37840	3.72183	8.82508	2.37117
ZNF891	chr12	133706528	133707594	NM_001277291	-	1	37959	0.705189	1.52157	2.15767
DKK1	chr10	54073989	54074827	NM_012242	+	1	37990	0.156709	0.190196	1.21369
DYRK3	chr1	206808523	206809187	NM_003582	+	1	38143	0.744366	1.0651	1.43088
SLFN12L	chr17	33814234	33814947	NM_001195790	-	1	38500	1.05778	1.33137	1.25864
MCOLN2	chr1	85462585	85463435	NM_153259	-	1	38690	21.5866	3.57568	0.165643
CCDC106	chr19	56159257	56159937	NM_013301	+	1	39185	0.705189	0.532548	0.755185
SLC25A43	chrX	118533163	118533787	NM_145305	+	1	39564	28.6385	24.2309	0.846097
ACAA2	chr18	47339411	47340956	NM_006111	-	1	39664	109.97	75.0893	0.682814
LRRK2	chr12	40618355	40618913	NM_198578	+	1	40485	1.33202	3.65176	2.74151
CD320	chr19	8372597	8373302	NM_016579	-	1	102	12.7326	37.0121	2.90688
CCDC108	chr2	219906107	219906328	NM_194302	-	1	1370	0.27424	0.41843	1.52578
GLIPR1L2	chr12	75784799	75785241	NM_152436	+	1	3589	0	0.0760783	#DIV/0!
GEMIN8	chrX	14047743	14048309	NM_001042480	-	1	4180	5.40645	5.13528	0.949845
EPOR	chr19	11493484	11494363	NR_033663	-	1	4186	4.27031	2.35843	0.552285
ZNF586	chr19	58280926	58281486	NM_001204814	+	1	4998	6.22917	3.46156	0.555702
SLC9A7P1	chr12	98850690	98851002	NR_033801	-	1	5260	0.54848	0.228235	0.416122
MGC45800	chr4	183063396	183066370	NR_027107	-	1	5316	0	0	#DIV/0!
ERVMER34-1	chr4	53617118	53617607	NM_001242690	-	1	6677	0.470126	0.570587	1.21369
MFSD4	chr1	205537751	205538443	NM_181644	+	1	6774	222.33	11.4117	0.0513279
EPB41L3	chr18	5542847	5543054	NM_012307	-	1	7243	33.1439	13.8843	0.41891
ATP6V1C2	chr2	10861206	10862382	NM_001039362	+	1	9510	42.0762	45.685	1.08577
PRKAG2-AS1	chr7	151572761	151575106	NR_038926	+	1	10894	1.72379	1.02706	0.595812
DSC3	chr18	28621489	28623117	NM_024423	-	1	11385	0.705189	1.5596	2.21161
PRR5	chr22	45064159	45065092	NM_001017529	+	1	13784	6.856	4.90705	0.715731
PRKG1	chr10	52833539	52834752	NM_006258	+	1	15847	8.65815	5.40156	0.62387
PRKAA2	chr1	57110663	57111337	NM_006252	+	1	16001	15.5533	1.25529	0.0807089
NEURL1B	chr5	172068286	172069174	NM_001142651	+	1	16853	64.2505	13.3517	0.207807
CPE	chr4	166299975	166300668	NM_001873	+	1	18711	18.5308	3.04313	0.16422
ZNF841	chr19	52598480	52599238	NM_001136499	-	1	19630	4.50537	3.84195	0.852749
DLX5	chr7	96653467	96654199	NM_005221	-	1	21699	0	0	#DIV/0!
ENHO	chr9	34522724	34523357	NM_198573	-	1	22997	1.05778	0.228235	0.215767
KIAA1239	chr4	37245250	37246979	NM_001144990	+	1	24032	0.861897	0	0
FAM218A	chr4	165878036	165878446	NM_153027	+	1	24891	0.744366	0	0
LRCH2	chrX	114468095	114468453	NM_001243963	-	1	26476	0.54848	0.570587	1.04031
WFDC2	chr20	44098280	44099536	NM_006103	+	1	26721	99.5883	8.52077	0.0855599
PMP22	chr17	15163930	15164810	NM_153322	-	1	27328	18.0998	24.3831	1.34714
PLS3	chrX	114795414	114796228	NM_005032	+	1	27833	22.4485	36.4795	1.62503
RBBP7	chrX	16887742	16889250	NM_001198719	-	1	27880	30.519	44.3917	1.45456
DGCR6	chr22	18893251	18894291	NM_005675	+	1	30602	0.979429	0.836861	0.854438
SETX	chr9	135229934	135230783	NM_015046	-	1	31307	97.747	96.5814	0.988075
SLC16A7	chr12	59989651	59990507	NM_001270622	+	1	31968	8.2272	7.03724	0.855363
LTBP4	chr19	41102845	41103281	NM_001042544	+	1	32059	25.3476	124.122	4.89678
PAPPA	chr9	118916362	118917175	NM_002581	+	1	32097	2.2331	5.66783	2.5381
RCBTB2	chr13	49106411	49107463	NM_001268	-	1	32442	3.17335	5.0592	1.59428
CA5B	chrX	15756051	15756636	NM_007220	+	1	33794	3.33006	3.4996	1.05091
GHR	chr5	42424338	42425047	NM_001242401	+	1	34540	35.2202	2.51058	0.0712824
NEGR1	chr1	72748471	72749736	NM_173808	-	1	35326	3.05582	3.72784	1.21991
PRKAG2	chr7	151572761	151575106	NM_016203	-	1	37438	13.4769	7.53175	0.558862
WNT9A	chr1	228134422	228136282	NM_003395	-	1	38446	0.0783543	0	0
CDYL	chr6	4775131	4777550	NM_004824	+	1	40779	40.9401	26.5513	0.64854
PQBP1	chrX	48754500	48755329	NM_001167992	+	1	79	9.87264	10.3847	1.05186
MORF4L2	chrX	102942107	102942486	NM_001142429	-	1	111	52.5757	48.6901	0.926095
OGT	chrX	70752638	70752965	NM_181673	+	1	183	78.8244	67.7097	0.858994
CACNA1C	chr12	2163289	2163548	NM_001129842	+	1	273	2.78158	5.70587	2.05131
AGPAT9	chr4	84457115	84457860	NM_032717	+	1	287	9.01074	4.33646	0.481255
UPF3B	chrX	118986684	118987252	NM_080632	-	1	306	5.13221	3.57568	0.696714
ALG13	chrX	110924384	110925275	NM_001257230	+	1	309	18.4916	12.8572	0.695301
LOC100133957	chrX	47518015	47518850	NR_027444	+	1	343	1.13614	1.44549	1.27228
RNFT2	chr12	117175623	117176436	NM_032814	+	1	358	0.82272	1.48353	1.8032
MAGT1	chrX	77150837	77151247	NM_032121	-	1	425	34.946	23.9266	0.684674
MAGED2	chrX	54834761	54835010	NM_201222	+	1	436	32.3211	29.8227	0.922699
ZNF182	chrX	47863379	47863596	NM_006962	-	1	452	3.80018	4.48862	1.18116
FRMD4B	chr3	69434926	69435583	NM_015123	-	1	491	26.1312	16.3568	0.625951
CARS	chr11	3078142	3078984	NM_001014437	-	1	511	16.9245	11.2596	0.665282
FXYD6	chr11	117747102	117747717	NM_001164837	-	1	525	6.89518	7.60783	1.10335
HCCS	chrX	11129276	11129758	NM_005333	+	1	545	22.7619	19.0956	0.83893
AMOT	chrX	112083564	112084815	NM_133265	-	1	832	15.0832	22.367	1.48291
BICC1	chr10	60272467	60273456	NM_001080512	+	1	842	1.99803	1.02706	0.514034
AHSA2	chr2	61404048	61405361	NM_152392	+	1	860	17.7081	10.5368	0.59503
CITED1	chrX	71524832	71527299	NM_004143	-	1	868	0.156709	0.45647	2.91286
CXorf57	chrX	105855028	105855297	NM_018015	+	1	875	1.09696	1.40745	1.28304
FXYD6-FXYD2	chr11	117747102	117747717	NM_001243598	-	1	880	0.430949	0.684704	1.58883
ZMAT1	chrX	101186525	101187258	NR_046008	-	1	888	2.82075	1.71176	0.606845
BRCC3	chrX	154299062	154299795	NM_001018055	+	1	909	24.0939	16.2427	0.674141
FLJ12334	chr2	20068428	20068907	NR_033875	+	1	910	0.587657	0.684704	1.16514
SEPT3	chr22	42372483	42373299	NM_145733	+	1	1015	0.195886	0.532548	2.71867
C1orf115	chr1	220863507	220864249	NM_024709	+	1	1144	57.3553	11.3357	0.197639
FLJ26850	chr19	50554012	50554492	NR_027257	+	1	1157	0.0783543	0	0
ACSF3	chr16	89160018	89160706	NR_023316	+	1	1233	8.65815	4.64077	0.536001
SLC9A6	chrX	135067507	135068309	NM_001177651	+	1	1268	13.046	11.8302	0.906805
TIMM17B	chrX	48754500	48755329	NM_001167947	-	1	1428	9.99017	8.97724	0.898607
PARP8	chr5	49962267	49963777	NM_001178055	+	1	1457	29.422	7.8741	0.267626
TAF9B	chrX	77394831	77395292	NM_015975	-	1	1533	8.61897	10.4608	1.21369
ARAF	chrX	47420402	47421099	NM_001256197	+	1	1546	11.949	8.71096	0.72901
FMR1	chrX	146993091	146994200	NM_001185081	+	1	1978	19.6669	18.487	0.940006
SEPT8	chr5	132112448	132113621	NM_001098813	-	1	2194	44.4269	30.5454	0.687544
C1GALT1C1	chrX	119763737	119764230	NM_152692	-	1	2269	11.1263	8.78704	0.789753
SLC30A2	chr1	26372281	26373313	NM_032513	-	1	2290	0.666011	0.114117	0.171345
TCEAL1	chrX	102884436	102884677	NM_001006639	+	1	2296	5.52398	8.0643	1.45987
SRRM1	chr1	24969027	24970196	NM_005839	+	1	2501	49.324	74.8991	1.51851
RPL10	chrX	153626095	153627324	NM_001256577	+	1	2601	40.705	93.6523	2.30076
PDE3A	chr12	20521616	20523122	NM_000921	+	1	2613	146.092	15.7102	0.107536
UXT	chrX	47518015	47518850	NM_004182	-	1	2633	10.4995	13.8082	1.31513
OTUD5	chrX	48814267	48815894	NM_001136157	-	1	2708	36.5131	32.9799	0.903236
MYADM	chr19	54369387	54369809	NM_001020820	+	1	2830	116.787	150.445	1.2882
LAGE3	chrX	153706928	153707816	NM_006014	-	1	2975	5.32809	6.61881	1.24225
SPACA5	chrX	47863379	47863596	NM_205856	+	1	2990	0.744366	0.152157	0.204411
KRBOX4	chrX	46306249	46306838	NM_001129899	+	1	3095	3.95689	4.83097	1.2209
LONRF3	chrX	118107469	118107949	NM_001031855	+	1	3131	4.46619	2.85294	0.638784
TAF1	chrX	70585715	70587063	NM_138923	+	1	3165	18.805	15.6341	0.831378
SLC35A2	chrX	48768763	48769474	NM_001042498	-	1	3203	28.8736	17.6882	0.612609
ZNF260	chr19	37018919	37019811	NM_001166037	-	1	3309	12.8109	11.0694	0.864058
CD99L2	chrX	150066792	150068172	NM_001242614	-	1	3388	5.21056	4.75489	0.912549
SLC25A14	chrX	129473463	129473945	NM_003951	+	1	3531	3.52594	2.6247	0.744397
NONO	chrX	70503261	70503963	NM_001145410	+	1	3558	71.8117	124.654	1.73585
ZNF221	chr19	44455311	44455732	NM_013359	+	1	3596	0.54848	0.722744	1.31772
SLC9A7	chrX	46618013	46618969	NM_001257291	-	1	3740	3.33006	6.80901	2.04471
AIFM1	chrX	129299432	129300105	NM_145812	-	1	3884	25.3476	20.5031	0.808877
MED12	chrX	70338280	70338866	NM_005120	+	1	3913	38.7854	34.6156	0.892491
C8orf47	chr8	99076754	99077244	NM_001170806	+	1	3972	1.01861	0.0380391	0.0373443
MAOA	chrX	43514030	43514793	NM_001270458	+	1	4356	356.63	123.133	0.345268
LAS1L	chrX	64754316	64754805	NM_031206	-	1	4702	8.89321	13.618	1.53128
ISL2	chr15	76628998	76629207	NM_145805	+	1	4826	0.0391771	2.39647	61.17
PYGL	chr14	51410614	51411464	NM_002863	-	1	4971	8.65815	7.98822	0.922624
PSMD10	chrX	107334420	107335139	NM_170750	-	1	5047	16.9245	17.6502	1.04287
CACHD1	chr1	64935554	64936614	NM_020925	+	1	5226	1.8805	2.20627	1.17323
RAI2	chrX	17878441	17878888	NM_001172739	-	1	5325	1.41038	1.29333	0.91701
WDR44	chrX	117479565	117480488	NM_001184966	+	1	5375	13.0852	18.449	1.40992
CDKL5	chrX	18443120	18444426	NM_003159	+	1	5715	4.93632	7.37959	1.49496
VMA21	chrX	150565211	150565865	NM_001017980	+	1	5725	22.5269	24.8396	1.10266
SCML1	chrX	17755053	17756648	NM_006746	+	1	5834	8.57979	4.94509	0.576364
BEAN1	chr16	66460503	66460850	NM_001197225	+	1	5919	0	0.0380391	#DIV/0!
TCEAL4	chrX	102840379	102841178	NM_024863	+	1	6094	14.809	18.5631	1.2535
TSPAN6	chrX	99891299	99891794	NM_003270	-	1	6174	89.9115	44.5058	0.494995
DMD	chrX	31284504	31285019	NM_004018	-	1	6372	11.2047	8.86312	0.791021
CTPS2	chrX	16729925	16730938	NM_175859	-	1	6500	12.6542	16.2807	1.28659
ZNF711	chrX	84498772	84499884	NM_021998	+	1	6680	11.8315	8.78704	0.742682
RBMX	chrX	135962102	135962951	NM_001164803	-	1	6912	7.48283	7.45567	0.99637
PRRG1	chrX	37208578	37209325	NM_000950	+	1	7102	11.9099	9.09135	0.763347
EFNA5	chr5	107005130	107008191	NM_001962	-	1	7123	9.40251	9.24351	0.983089
HTRA1	chr10	124220338	124222240	NM_002775	+	1	7232	3.01664	6.04822	2.00495
UBE2A	chrX	118708293	118709240	NM_003336	+	1	7316	49.324	56.5642	1.14679
C12orf49	chr12	117175623	117176436	NM_024738	-	1	7320	43.9959	34.1591	0.776416
CPNE4	chr3	131753880	131754139	NM_130808	-	1	7336	0.391771	0	0
CXorf40A	chrX	148622270	148623178	NM_001171907	+	1	7446	7.63954	4.86901	0.637343
FAM127B	chrX	134185563	134186337	NM_001134321	-	1	7461	15.6317	30.4693	1.9492
TRPC1	chr3	142442702	142443978	NM_003304	+	1	7586	1.09696	0.608626	0.55483
TCEAL3	chrX	102862719	102863148	NM_032926	+	1	7753	4.77961	2.13019	0.445683
ARMCX5	chrX	101854275	101854527	NM_001168485	+	1	7755	9.95099	12.2866	1.23471
GAB3	chrX	153978838	153979650	NM_080612	-	1	7833	2.46816	4.64077	1.88026
ZMYM3	chrX	70473812	70474287	NM_005096	-	1	8211	17.6689	21.1498	1.19701
BRWD3	chrX	80064923	80065136	NM_153252	-	1	8377	40.0782	46.8262	1.16837
MMGT1	chrX	135055671	135056158	NM_173470	-	1	8455	23.4279	25.0298	1.06837
SPIN3	chrX	57021591	57022044	NR_027139	-	1	8519	2.15474	1.59764	0.741454
PDGFA	chr7	556611	562845	NM_002607	-	1	8647	42.5856	13.8082	0.324246
TAB3	chrX	30906901	30907728	NM_152787	-	1	8663	31.5768	27.8446	0.881808
FOXO4	chrX	70315496	70315853	NM_001170931	+	1	8764	10.5778	9.69998	0.91701
UTP14A	chrX	129039750	129040152	NM_001166221	+	1	8970	5.21056	10.0423	1.9273
ZNF81	chrX	47696092	47696364	NM_007137	+	1	9211	17.0029	10.3847	0.61076
TWSG1	chr18	9333896	9334244	NM_020648	+	1	9231	55.945	39.7129	0.709856
ATRX	chrX	77041003	77041725	NM_000489	-	1	9307	32.8304	42.1474	1.28379
SLC17A7	chr19	49944408	49944656	NM_020309	-	1	9334	0	0.0380391	#DIV/0!
RNF113A	chrX	119005251	119006217	NM_006978	-	1	9448	5.95493	10.2706	1.72472
CEP41	chr7	130080527	130081067	NM_001257160	-	1	9547	0.117531	0.532548	4.53111
MPP1	chrX	154033366	154033935	NM_001166462	-	1	9694	15.2399	5.70587	0.374403
SPTBN1	chr2	54682899	54684374	NM_003128	+	1	9788	595.297	484.999	0.814718
EIF4G3	chr1	21503115	21503836	NM_001198801	-	1	9994	105.7	96.8476	0.916251
KREMEN2	chr16	3013016	3013228	NM_024507	+	1	10086	0.587657	0.342352	0.582571
HOMER3	chr19	19051019	19051939	NM_001145722	-	1	10087	0.901074	2.58666	2.87064
IGBP1	chrX	69353104	69353904	NM_001551	+	1	10105	42.5856	78.6269	1.84633
TCTE1	chr6	44264970	44265711	NM_182539	-	1	10234	0	0	#DIV/0!
MORF4L2-AS1	chrX	102942107	102942486	NR_038978	+	1	10425	0.666011	0.532548	0.799608
GADL1	chr3	30936047	30936265	NM_207359	-	1	10576	0	0	#DIV/0!
WDR45	chrX	48937435	48937976	NM_001029896	-	1	10906	9.71593	9.92821	1.02185
ANKRD44	chr2	198174658	198175535	NM_001195144	-	1	11063	5.71986	10.7651	1.88205
SNORD61	chrX	135962102	135962951	NR_002735	-	1	11178	0	0	#DIV/0!
AFF2	chrX	147581861	147582072	NM_001169124	+	1	11264	0.470126	15.3678	32.6887
HUWE1	chrX	53713068	53713794	NM_031407	-	1	11364	175.553	223.176	1.27127
ZNF674	chrX	46404634	46405165	NM_001146291	-	1	12900	1.41038	1.52157	1.07884
HDGFRP2	chr19	4472119	4473123	NM_001001520	+	1	12917	6.93435	8.97724	1.2946
HNRNPH2	chrX	100662827	100663592	NM_019597	+	1	13103	44.0743	30.7737	0.698223
GGTA1P	chr9	124261806	124262587	NR_003191	-	1	13357	0.901074	0.989017	1.0976
RPL36A-HNRNPH2	chrX	100645780	100646107	NM_001199974	+	1	13393	44.4661	32.4474	0.729711
RP2	chrX	46696141	46697075	NM_006915	+	1	13531	16.141	11.64	0.721144
XKRX	chrX	100183877	100184344	NM_212559	-	1	13608	0.352594	1.33137	3.77593
WDR13	chrX	48455942	48456594	NM_017883	+	1	13918	22.4093	16.8133	0.750281
PIGA	chrX	15353369	15354008	NM_020473	-	1	14176	3.56512	2.85294	0.800235
RPL36A	chrX	100645780	100646107	NM_021029	+	1	14313	1.91968	4.26038	2.21932
AR	chrX	66763684	66764077	NM_000044	+	1	14388	0.861897	1.29333	1.50056
PTK7	chr6	43044044	43045057	NM_152882	+	1	14626	4.15278	4.41254	1.06255
HMCN1	chr1	185703458	185703662	NM_031935	+	1	14917	3.01664	3.19529	1.05922
CTU1	chr19	51611423	51612176	NM_145232	-	1	15033	0.587657	1.10313	1.87717
HRK	chr12	117318708	117319521	NM_003806	-	1	15077	0	0	#DIV/0!
IL1RAPL2	chrX	103809794	103810167	NM_017416	+	1	15134	0	0	#DIV/0!
MGC45922	chr19	51321267	51321781	NR_038359	+	1	15507	0.352594	0.0760783	0.215767
NKAPP1	chrX	119378646	119379039	NR_027131	-	1	15827	0.979429	0.684704	0.699086
GPR68	chr14	91719576	91720228	NM_003485	-	1	16058	5.24974	2.73882	0.521706
ATG4A	chrX	107334420	107335139	NM_178270	+	1	16262	12.1449	7.30351	0.601364
KLHL29	chr2	23607729	23610124	NM_052920	+	1	16376	3.80018	4.90705	1.29127
C14orf37	chr14	58618291	58619220	NM_001001872	-	1	16500	0.352594	1.0651	3.02074
ZNF845	chr19	53836795	53837495	NM_138374	+	1	16585	4.03525	2.85294	0.707004
THOC2	chrX	122866199	122867097	NM_001081550	-	1	16615	25.2693	26.247	1.03869
ATP7A	chrX	77165924	77166295	NM_000052	+	1	16657	17.5905	16.4329	0.93419
DNAJC22	chr12	49738680	49740841	NM_024902	+	1	16942	10.0293	6.58077	0.656151
PIM2	chrX	48775763	48776813	NM_006875	-	1	17131	15.3183	33.6646	2.19768
SMIM7	chr19	16770636	16772632	NM_024104	-	1	17184	13.7512	13.58	0.98755
YIPF6	chrX	67718427	67719071	NM_001195214	+	1	17225	52.6541	41.1203	0.780952
TMEM38A	chr19	16770636	16772632	NM_024074	+	1	17230	1.48873	0.836861	0.56213
MAP2K4P1	chrX	72782945	72783165	NR_029423	-	1	17505	0.626834	0.41843	0.66753
TTLL7	chr1	84464223	84465232	NM_024686	-	1	17747	2.31145	0.646665	0.279766
GPKOW	chrX	48979844	48980266	NM_015698	-	1	17788	11.2047	7.98822	0.712937
HSD17B10	chrX	53461178	53461463	NM_004493	-	1	17927	14.6131	14.0364	0.96054
LOC375295	chr2	177502240	177502910	NR_040001	-	1	18215	0.0391771	0.304313	7.76762
ENOX2	chrX	130036747	130037158	NM_182314	-	1	18250	6.66011	10.3466	1.55352
PRPS1	chrX	106871621	106871827	NM_002764	+	1	18303	3.64347	7.95018	2.18203
AMIGO2	chr12	47473177	47474120	NM_001143668	-	1	18405	2.70322	3.00509	1.11167
PDK3	chrX	24483016	24483947	NM_005391	+	1	18435	3.05582	7.64587	2.50207
USP11	chrX	47092559	47093306	NM_004651	+	1	18536	11.5573	14.9494	1.29351
GLA	chrX	100662827	100663592	NM_000169	-	1	19328	6.50341	7.56979	1.16397
OCRL	chrX	128674133	128674727	NM_000276	+	1	19399	35.8863	38.1152	1.06211
ARMCX5-GPRASP2	chrX	101854275	101854527	NM_001199818	+	1	19583	3.36923	2.39647	0.711279
EBP	chrX	48379897	48380637	NM_006579	+	1	19771	26.6405	17.8784	0.671099
SLC16A2	chrX	73639898	73640778	NM_006517	+	1	19871	2.66405	6.73293	2.52733
SUPT7L	chr2	27886259	27887410	NM_014860	-	1	19923	29.0694	28.2631	0.972261
FGF11	chr17	7342829	7344028	NM_004112	+	1	20148	0.313417	1.5596	4.97613
APEX2	chrX	55026359	55026985	NM_001271748	+	1	20152	16.8853	21.416	1.26832
ZNF776	chr19	58258088	58258619	NM_173632	+	1	20897	10.5387	8.10234	0.768821
MBNL3	chrX	131623144	131624115	NM_001170704	-	1	21110	80.4307	75.5077	0.938792
ARHGEF9	chrX	62974713	62975218	NM_001173480	-	1	21533	31.5376	18.1066	0.574128
CMC4	chrX	154299062	154299795	NM_001018024	-	1	21620	2.2331	2.58666	1.15833
OPHN1	chrX	67652946	67653907	NM_002547	-	1	21627	11.9099	7.53175	0.632397
KCNV1	chr8	110986113	110986983	NM_014379	-	1	22319	0.391771	0.8749	2.23319
NKRF	chrX	118739709	118740515	NM_001173487	-	1	22559	8.54062	11.5259	1.34953
TMSB15A	chrX	101771337	101771673	NM_021992	-	1	22789	0	0	#DIV/0!
PRKCH	chr14	61787880	61789467	NM_006255	+	1	23003	8.65815	14.6451	1.69148
CHIC1	chrX	72782945	72783165	NM_001039840	+	1	23018	15.5925	14.8353	0.951436
SLC34A2	chr4	25657119	25657547	NM_001177999	+	1	23148	0	0.152157	#DIV/0!
GNL3L	chrX	54556428	54556959	NM_019067	+	1	23259	21.1165	28.8337	1.36546
LINC00630	chrX	102024034	102024255	NR_038988	+	1	23411	0.979429	1.0651	1.08747
ZNF702P	chr19	53496732	53497028	NR_003578	-	1	23439	2.93829	0.836861	0.284813
MIR618	chr12	81330608	81331514	NR_030349	-	1	23444	0	0	#DIV/0!
TMEM255B	chr13	114461829	114462490	NM_182614	+	1	23466	0	0.114117	#DIV/0!
PDE2A	chr11	72353222	72354358	NM_001143839	-	1	23499	2.07639	1.21725	0.586235
TAF7	chr5	140699898	140700495	NM_005642	-	1	23659	56.4934	31.5344	0.558197
CSTF2	chrX	100075232	100075559	NM_001325	+	1	24848	6.77765	5.74391	0.847479
PIH1D3	chrX	106449029	106449740	NM_173494	+	1	24850	0	0	#DIV/0!
FTX	chrX	73512193	73512569	NR_028379	-	1	25085	3.64347	4.1843	1.14844
ABLIM3	chr5	148520992	148521467	NM_014945	+	1	25428	2.70322	6.39057	2.36406
MTM1	chrX	149736720	149737756	NM_000252	+	1	25469	34.6326	15.1015	0.43605
SLC4A1AP	chr2	27886259	27887410	NM_018158	+	1	25679	14.8481	12.9713	0.873601
KLF1	chr19	12996086	12997039	NM_006563	-	1	25728	0	0.228235	#DIV/0!
C11orf70	chr11	101918073	101918493	NM_032930	+	1	25902	0.352594	0.798822	2.26556
SAT1	chrX	23801055	23801724	NM_002970	+	1	26152	177.277	145.5	0.82075
UBA1	chrX	47050088	47050340	NM_153280	+	1	26162	177.12	215.492	1.21664
RNF152	chr18	59560494	59562016	NM_173557	-	1	26215	29.4612	4.3745	0.148483
CACNG4	chr17	64961007	64962321	NM_014405	+	1	26275	1.13614	0	0
DLX1	chr2	172949242	172950126	NM_178120	+	1	26429	0	0.0760783	#DIV/0!
MIR4792	chr3	24562863	24563576	NR_039955	-	1	26599	0	0	#DIV/0!
RFX6	chr6	117198089	117198705	NM_173560	+	1	26600	6.18999	0.228235	0.0368716
NUP62CL	chrX	106449029	106449740	NM_017681	-	1	26681	1.48873	1.02706	0.689887
FLJ44511	chr7	556611	562845	NR_033963	+	1	26943	0.54848	0.114117	0.208061
HCFC1	chrX	153236071	153238480	NM_005334	-	1	27274	81.1359	118.872	1.4651
GSPT2	chrX	51486414	51487010	NM_018094	+	1	27300	2.78158	5.02117	1.80515
TMEM187	chrX	153236071	153238480	NM_003492	+	1	27445	2.38981	2.96705	1.24155
POLE4	chr2	75185567	75186177	NM_019896	+	1	27577	12.8109	9.12939	0.712626
ZNF449	chrX	134477583	134477999	NM_152695	+	1	27629	2.11557	2.39647	1.13278
GJB2	chr13	20766208	20767779	NM_004004	-	1	27819	41.0576	28.4533	0.693008
TPM3P9	chr19	53935089	53935291	NR_003148	+	1	27876	4.30949	3.80391	0.882684
LOC100131434	chrX	148622270	148623178	NR_027455	-	1	28218	3.09499	0.8749	0.282682
TMEM170B	chr6	11537537	11538929	NM_001100829	+	1	28336	2.50734	1.33137	0.53099
ZNF630	chrX	47930635	47931143	NM_001190255	-	1	28629	2.78158	2.85294	1.02565
RASA4	chr7	102256802	102257489	NM_001079877	-	1	28843	10.2644	9.20547	0.896834
RASA4B	chr7	102157823	102158510	NM_001277335	-	1	29161	8.57979	10.3847	1.21037
TLR2	chr4	154605086	154606052	NM_003264	+	1	29599	1.8805	3.65176	1.9419
DENND2C	chr1	115212239	115212985	NM_001256404	-	1	29894	0.235063	0.41843	1.78008
ZNF555	chr19	2840864	2842213	NM_001172775	+	1	30057	3.76101	3.76587	1.00129
LOC100505687	chr3	183165238	183165667	NR_038302	+	1	30585	0.705189	0.684704	0.970952
NR2F1	chr5	92919558	92921430	NM_005654	+	1	31285	0.54848	1.94	3.53704
PCOLCE2	chr3	142607195	142608229	NM_013363	-	1	31783	0.313417	1.36941	4.36929
ZCCHC12	chrX	117957615	117957937	NM_173798	+	1	31790	0	0	#DIV/0!
ZNF761	chr19	53935089	53935291	NM_001008401	+	1	31799	5.56315	6.77097	1.21711
ZNF432	chr19	52551831	52552214	NM_014650	-	1	31965	3.56512	3.42352	0.960282
SLFN5	chr17	33569141	33570527	NM_144975	+	1	32170	18.4133	42.2615	2.29517
STXBP5L	chr3	120626880	120627579	NM_014980	+	1	32495	0.666011	0.190196	0.285574
SHISA8	chr22	42310057	42311669	NM_001207020	-	1	32671	0	0.228235	#DIV/0!
SHROOM2	chrX	9753566	9755101	NM_001649	+	1	32837	18.8834	5.2494	0.27799
MIR2277	chr5	92956320	92957340	NR_031754	-	1	32971	0.54848	0.646665	1.17901
NME9	chr3	138048193	138048778	NM_178130	-	1	32989	1.13614	0.41843	0.368292
RBM41	chrX	106361519	106361900	NM_001171080	-	1	33060	13.1243	12.8953	0.982546
HSPA13	chr21	15755371	15756086	NM_006948	-	1	33211	11.283	11.4117	1.01141
LRRN2	chr1	204654132	204654885	NM_201630	-	1	33438	25.7002	2.92901	0.113968
ZNF551	chr19	58193268	58193638	NM_138347	+	1	33603	2.62487	1.94	0.739083
ZNF420	chr19	37568952	37569549	NM_144689	+	1	33818	1.91968	2.66274	1.38707
RNLS	chr10	90342528	90343221	NM_018363	-	1	33906	4.58373	1.7498	0.381742
ZNF674-AS1	chrX	46404634	46405165	NR_015378	+	1	33953	0.626834	0.45647	0.728214
USP51	chrX	55515067	55515544	NM_201286	-	1	34288	1.80215	1.02706	0.569907
SLC25A53	chrX	103401400	103401778	NM_001012755	-	1	34377	1.01861	1.21725	1.19502
HTATSF1	chrX	135579001	135580099	NM_014500	+	1	34518	43.8784	52.494	1.19635
EFNB2	chr13	107186468	107189024	NM_004093	-	1	34710	83.0164	44.4297	0.535192
SPICE1	chr3	113233663	113234094	NM_144718	-	1	35323	17.3555	15.2157	0.876706
TMLHE	chrX	154842112	154842719	NM_001184797	-	1	35350	8.57979	11.4878	1.33894
UBQLN2	chrX	56589945	56590514	NM_013444	+	1	35628	49.8333	72.9591	1.46406
LIN7A	chr12	81330608	81331514	NM_004664	-	1	36784	0.430949	0.228235	0.52961
SUGT1P1	chr9	33510858	33511221	NR_003667	-	1	37027	0	0	#DIV/0!
POLA1	chrX	24711630	24712284	NM_016937	+	1	37850	7.87461	11.4498	1.45401
FUNDC2	chrX	154254915	154255696	NM_023934	+	1	38040	14.5347	17.8023	1.22481
MTCP1	chrX	154299062	154299795	NM_001018025	-	1	38419	1.29285	1.33137	1.0298
RBM3	chrX	48432815	48433322	NM_006743	+	1	39251	69.5394	101.793	1.46381
CORIN	chr4	47838604	47839946	NM_006587	-	1	39946	0.352594	0.266274	0.755185
FRMPD1	chr9	37650696	37651409	NM_014907	+	1	40112	0	0.608626	#DIV/0!
MTMR8	chrX	63614957	63615423	NM_017677	-	1	40148	1.80215	1.52157	0.844306
NDUFA1	chrX	119005251	119006217	NM_004541	+	1	40307	32.7129	28.2631	0.863973
RPL39	chrX	118925157	118926129	NM_001000	-	1	40670	17.6297	51.3148	2.9107
MIR193B	chr16	14395604	14397075	NR_030177	+	1	40792	0	0	#DIV/0!
FAM117A	chr17	47840834	47841377	NM_030802	-	1	40846	7.32613	9.09135	1.24095
TMEM229A	chr7	123672063	123673691	NM_001136002	-	1	6406	0.0783543	0.342352	4.36929
HMX2	chr10	124907283	124911035	NM_005519	+	1	8556	0.0391771	0	0
NPY1R	chr4	164252954	164253471	NM_000909	-	1	9280	1.41038	3.4996	2.48132
ACOXL	chr2	111489977	111490884	NM_001142807	+	1	10991	0.470126	0.266274	0.566389
NDNF	chr4	121992003	121993703	NM_024574	-	1	12382	20.7639	32.3713	1.55902
CBR1	chr21	37442140	37442778	NM_001757	+	1	391	11.2438	15.7482	1.40061
GULP1	chr2	189156416	189157719	NR_045562	+	1	1515	4.23113	3.19529	0.755185
CRYGN	chr7	151136933	151137273	NM_144727	-	1	2728	0	0	#DIV/0!
GBX1	chr7	150863966	150865511	NM_001098834	-	1	3097	0.0391771	0	0
RRBP1	chr20	17661521	17663456	NM_001042576	-	1	3609	127.169	60.5203	0.475904
MFSD2B	chr2	24232680	24233260	NM_001080473	+	1	21589	0	0	#DIV/0!
KCTD12	chr13	77459322	77461099	NM_138444	-	1	32949	138.726	50.4399	0.363593
TMEM221	chr19	17558917	17559679	NM_001190844	-	1	37064	0.313417	0	0

## Sheet: 2_IIa EpiG. inactivated genes
Total number of genes hypermethylated in LST #2	1837
Hypermethylated in LST #2 but silent in normal	426
Epigenetically inactivated in LST #2	564
Symbol	Chr	Start	End	Gene ID	Strand	CpG	Pos	2_N_Xprn	2_IIa_Xprn	2_IIa_FC
WNT3A	chr1	228194096	228196512	NM_033131	+	1	2669	0.0787554	0	0
ZSCAN18	chr19	58609338	58609988	NM_023926	-	1	7127	5.00097	1.36156	0.272259
PPP1R16B	chr20	37434206	37435592	NM_001172735	+	1	7347	14.9242	3.90068	0.261367
MYH10	chr17	8533004	8534933	NM_005964	-	1	8729	6.02479	5.66702	0.940617
ADARB2	chr10	1778784	1780018	NM_018702	-	1	10524	0.0787554	0	0
GRIN2C	chr17	72855621	72858012	NM_000835	-	1	17310	0.236266	0.0735977	0.311503
AKR1B1	chr7	134143115	134144063	NM_001628	-	1	17430	7.04861	3.67988	0.522072
OLIG1	chr21	34442206	34444543	NM_138983	+	1	29187	0	0	#DIV/0!
ZNF568	chr19	37406931	37407463	NM_001204837	+	1	31	0.748177	0.147195	0.196739
ELMOD1	chr11	107461743	107462648	NM_001130037	+	1	4313	0	0	#DIV/0!
PCDHGC3	chr5	140855386	140856620	NM_032402	+	1	4378	14.5698	6.2926	0.431895
TRPC4	chr13	38443682	38444228	NM_001135956	-	1	5602	0.196889	0.33119	1.68212
ZNF829	chr19	37406931	37407463	NM_001171979	-	1	8315	0.748177	0.0367988	0.0491847
NTNG1	chr1	107682889	107684463	NM_001113228	+	1	10680	0.984443	0.294391	0.299043
CHST11	chr12	104850253	104852395	NM_018413	+	1	12802	12.3646	6.219	0.502968
ZNF625	chr19	12266998	12267686	NM_145233	-	1	14753	1.18133	0.441586	0.373804
SSTR2	chr17	71160922	71162350	NM_001050	+	1	15525	0.748177	0.441586	0.590216
ZNF804B	chr7	88388488	88389283	NM_181646	+	1	19698	0	0	#DIV/0!
RFTN1	chr3	16554327	16555413	NM_015150	-	1	21724	13.7822	4.89425	0.355113
GPR12	chr13	27334226	27335205	NM_005288	-	1	22906	0.157511	0	0
SDC2	chr8	97505747	97507607	NM_002998	+	1	23304	14.2941	9.3837	0.656473
LOC643923	chr11	107461743	107462648	NR_028328	+	1	24284	0	0	#DIV/0!
ZNF625-ZNF20	chr19	12266998	12267686	NR_037802	-	1	25043	4.33155	3.1647	0.730616
ZNF331	chr19	54023868	54024560	NM_018555	+	1	27082	2.79582	0.95677	0.342215
RASSF2	chr20	4803013	4804146	NM_014737	-	1	37980	16.263	4.82065	0.296418
CLSTN2	chr3	139653430	139655115	NM_022131	+	1	257	0.236266	0.404787	1.71327
SLC6A15	chr12	85305663	85305876	NM_018057	-	1	713	0	0	#DIV/0!
ZNF304	chr19	57862441	57863236	NM_020657	+	1	1849	3.70151	1.36156	0.367839
FLI1	chr11	128562671	128565011	NM_001271010	+	1	2185	8.22994	4.52626	0.549974
UST	chr6	149068179	149069775	NM_005715	+	1	2804	5.90666	1.83994	0.311503
LIFR	chr5	38556222	38557563	NM_001127671	-	1	3473	8.6631	6.66059	0.768846
PTPRZ1	chr7	121513046	121513911	NM_001206838	+	1	4248	0.157511	0.183994	1.16814
ZNF43	chr19	22034394	22034943	NM_001256653	-	1	5346	7.48177	0.809574	0.108206
MMP16	chr8	89339965	89340481	NM_005941	-	1	5778	0.433155	0.551983	1.27433
TOX2	chr20	42543097	42545137	NM_032883	+	1	5902	2.1264	1.43515	0.674923
TLL1	chr4	166794545	166795341	NM_012464	+	1	5989	0.551288	0.662379	1.20151
FAM5B	chr1	177140120	177140323	NM_021165	+	1	7155	0	0	#DIV/0!
MIR4500HG	chr13	88323569	88324640	NR_033829	-	1	7193	0	0	#DIV/0!
PRKCB	chr16	23846941	23848102	NM_002738	+	1	8608	23.4297	6.18221	0.263861
ZNF813	chr19	53970802	53971473	NM_001004301	+	1	8938	3.62275	2.28153	0.629778
FGF14-IT1	chr13	103046680	103047226	NR_036486	-	1	9653	0.0787554	0.220793	2.80353
LPPR4	chr1	99729982	99730335	NM_014839	+	1	10461	0.630044	0.809574	1.28495
TNFSF11	chr13	43148277	43149282	NM_003701	+	1	10623	3.34711	2.09753	0.626671
EYA4	chr6	133562086	133563586	NM_172105	+	1	13910	0	0.0735977	#DIV/0!
PTF1A	chr10	23480697	23482455	NM_178161	+	1	15025	0	0	#DIV/0!
CLVS2	chr6	123317164	123317753	NM_001010852	+	1	18214	0.0393777	0	0
ZBTB8B	chr1	32930500	32931061	NM_001145720	+	1	18983	0.0787554	0	0
FLI1-AS1	chr11	128562671	128565011	NR_038908	-	1	19059	0.236266	0.147195	0.623006
DFNA5	chr7	24796541	24797487	NM_004403	-	1	19777	0.590666	0.62558	1.05911
CD38	chr4	15779998	15780729	NM_001775	+	1	20063	3.30773	1.87674	0.567381
C11orf96	chr11	43963626	43966048	NM_001145033	+	1	21017	1.14195	0.441586	0.386693
TMEM178B	chr7	140772358	140774560	NM_001195278	+	1	21176	1.92951	14.4251	7.47607
FOXB1	chr15	60296135	60298520	NM_012182	+	1	21251	0	0	#DIV/0!
RORA	chr15	61520423	61521716	NM_134261	-	1	22240	10.1201	10.6349	1.05087
PHACTR3	chr20	58179808	58180787	NM_080672	+	1	22691	0.354399	0.220793	0.623006
MAP1B	chr5	71402877	71404868	NM_005909	+	1	23010	37.9995	13.7628	0.362183
METTL24	chr6	110678854	110679108	NM_001123364	-	1	23434	0.157511	0.220793	1.40176
ELOVL4	chr6	80656744	80657593	NM_022726	-	1	23502	0.157511	0.441586	2.80353
SYT2	chr1	202678881	202679769	NM_177402	-	1	23744	3.85902	5.11504	1.32548
FGF14-AS2	chr13	103046680	103047226	NR_036487	+	1	25690	0.196889	0	0
USP44	chr12	95941906	95942979	NM_001042403	-	1	26268	0.0787554	0.0367988	0.467255
GRID2	chr4	93226348	93227007	NM_001510	+	1	26812	0	0	#DIV/0!
TENM4	chr11	79148358	79152200	NM_001098816	-	1	27067	0.86631	0.95677	1.10442
SLITRK5	chr13	88323569	88324640	NM_015567	+	1	27769	1.69324	0.367988	0.217328
CD70	chr19	6590340	6591072	NM_001252	-	1	27785	0.196889	0.110397	0.560705
MIR3650	chr5	38556222	38557563	NR_037423	-	1	28115	0	0	#DIV/0!
ASTN2	chr9	120175253	120177496	NM_014010	-	1	29748	1.18133	1.14076	0.965659
ZNF660	chr3	44626325	44626794	NM_173658	+	1	30770	0.354399	0.404787	1.14218
PRMT8	chr12	3599966	3603008	NM_019854	+	1	39397	0	0.0735977	#DIV/0!
SPOCK3	chr4	168155005	168155765	NM_001204356	-	1	1970	0	0	#DIV/0!
CCDC169	chr13	36871667	36872059	NM_001144981	-	1	4168	0.0787554	0	0
AUTS2	chr7	69062374	69065037	NM_015570	+	1	5889	31.896	74.6648	2.34089
NDRG4	chr16	58497033	58498595	NM_020465	+	1	6437	0.905688	1.03037	1.13766
ST8SIA1	chr12	22486835	22488666	NM_003034	-	1	17986	1.81138	0.62558	0.345362
ZNF790-AS1	chr19	37288342	37288723	NR_040027	+	1	22263	0.196889	0.0367988	0.186902
ADHFE1	chr8	67344497	67344989	NM_144650	+	1	34465	0.708799	0.33119	0.467255
CCDC169-SOHLH2	chr13	36871667	36872059	NM_001198910	-	1	36160	0.118133	0	0
NPAS1	chr19	47522904	47525190	NM_002517	+	1	37302	0.0787554	0.110397	1.40176
CRH	chr8	67089249	67089962	NM_000756	-	1	44	0	0	#DIV/0!
JAM2	chr21	27011624	27012398	NM_001270407	+	1	356	2.75644	5.22544	1.89572
EMBP1	chr1	121260857	121261525	NR_003955	+	1	1082	2.08702	2.61272	1.25189
CD1D	chr1	158150620	158151503	NM_001766	+	1	9316	5.1191	3.0175	0.58946
RAB39A	chr11	107798958	107799980	NM_017516	+	1	16969	0.354399	0.220793	0.623006
AP3B2	chr15	83378007	83379068	NM_004644	-	1	20175	0.157511	0.0367988	0.233627
TFPI2	chr7	93519366	93520184	NM_006528	-	1	20972	0.945065	0.294391	0.311503
LOC285084	chr2	175190866	175192123	NR_038897	+	1	26768	0	0	#DIV/0!
CDH4	chr20	59826977	59828978	NM_001794	+	1	30806	0.354399	0.0735977	0.207669
KIF5C	chr2	149632682	149633882	NM_004522	+	1	30839	4.17404	0.883172	0.211587
MPPED2	chr11	30606004	30608128	NM_001145399	-	1	34677	0.393777	0.257592	0.654156
CNPY1	chr7	155325811	155326357	NM_001103176	-	1	1770	0	0	#DIV/0!
GALNT14	chr2	31360321	31361821	NM_024572	-	1	3042	0.275644	0	0
AK5	chr1	77747314	77748224	NM_012093	+	1	4834	0.748177	0.809574	1.08206
MICU3	chr8	16884363	16885339	NM_181723	+	1	5833	0.196889	0.110397	0.560705
ARHGAP20	chr11	110581839	110583883	NM_001258418	-	1	7247	1.85075	1.21436	0.656145
LMO1	chr11	8284102	8285032	NR_073006	-	1	11639	0	0	#DIV/0!
AGTR1	chr3	148415442	148415932	NM_000685	+	1	12313	1.22071	0.367988	0.301455
PREX2	chr8	68864584	68864946	NM_024870	+	1	13529	1.37822	2.35513	1.70882
GPM6A	chr4	176923075	176923630	NM_001261447	-	1	15495	0.0787554	0	0
TIAM1	chr21	32929927	32932017	NM_003253	-	1	17647	3.34711	1.98714	0.593688
NSG1	chr4	4387593	4389919	NM_001040101	+	1	24158	1.772	2.79671	1.57828
LRRN1	chr3	3840513	3842772	NM_020873	+	1	25971	1.29946	0.404787	0.311503
ANO5	chr11	22214172	22215320	NM_001142649	+	1	36956	15.948	0.62558	0.0392263
DPY19L2	chr12	64061836	64062774	NM_173812	-	1	11782	0.157511	0.441586	2.80353
HCK	chr20	30639908	30640786	NM_001172130	+	1	12799	4.17404	2.35513	0.564232
CSMD2	chr1	34628783	34630976	NM_052896	-	1	39041	0.393777	0.220793	0.560705
KLHL14	chr18	30349690	30352302	NM_020805	-	1	870	0.905688	0.0735977	0.0812617
RGMA	chr15	93631428	93633173	NM_020211	-	1	2186	0.630044	0.883172	1.40176
NR3C1	chr5	142782071	142785071	NM_001204263	-	1	3124	30.3996	11.4812	0.377677
RSPO3	chr6	127439265	127441072	NM_032784	+	1	3601	0.945065	0.441586	0.467255
ZNF682	chr19	20149855	20150175	NM_033196	-	1	4614	1.26009	0.110397	0.0876102
NGFR	chr17	47572345	47575316	NM_002507	+	1	6027	0.315022	0.0735977	0.233627
ADD2	chr2	70994447	70995385	NM_001185054	-	1	6554	0.708799	1.54555	2.18052
PREX1	chr20	47443734	47445181	NM_020820	-	1	7124	18.4682	9.08931	0.492162
NRCAM	chr7	108095401	108097206	NM_001193584	-	1	8318	0.905688	0.846373	0.934509
FGF5	chr4	81187494	81187913	NM_033143	+	1	9306	0	0	#DIV/0!
IGSF9B	chr11	133825337	133827457	NM_014987	-	1	11533	1.02382	0.95677	0.934509
VCAN	chr5	82768387	82769268	NM_001126336	+	1	11873	6.1823	7.72776	1.24998
NLGN4X	chrX	6144120	6145906	NM_181332	-	1	12137	1.33884	1.76634	1.31931
ZNF549	chr19	58038572	58039208	NM_153263	+	1	14933	2.36266	0.515184	0.218052
FBXL7	chr5	15500076	15500923	NM_012304	+	1	16931	5.43413	3.1647	0.582375
FAM150A	chr8	53477544	53478627	NM_207413	-	1	18203	0.0393777	0.0735977	1.86902
EMILIN2	chr18	2846565	2848175	NM_032048	+	1	18799	4.37093	4.52626	1.03554
HELT	chr4	185939222	185942747	NM_001029887	+	1	20061	0	0	#DIV/0!
PTPRM	chr18	7566557	7568830	NM_001105244	+	1	20266	11.577	7.10218	0.61347
B3GAT1	chr11	134281380	134282919	NM_054025	-	1	21123	0.236266	0.0735977	0.311503
TACR1	chr2	75426592	75428030	NM_015727	-	1	21623	0.393777	0.515184	1.30831
DPF1	chr19	38719089	38720627	NM_001135156	-	1	22695	0.0393777	0	0
ZNF793	chr19	37997790	37998125	NM_001013659	+	1	25175	1.29946	0	0
LONRF2	chr2	100937779	100939059	NM_198461	-	1	25536	1.22071	0.0735977	0.0602909
ZNF788	chr19	12203028	12203503	NR_027049	+	1	29128	0.275644	0.33119	1.20151
PDGFD	chr11	104034536	104035058	NM_033135	-	1	30124	5.27661	6.99178	1.32505
EPHB1	chr3	134514085	134515980	NM_004441	+	1	32758	0.196889	0.257592	1.30831
ZNF773	chr19	58011124	58011743	NM_198542	+	1	32889	0.551288	0.809574	1.46851
ZNF529	chr19	37063892	37064749	NM_020951	-	1	35434	2.75644	2.98071	1.08136
MVB12A	chr19	17530650	17531535	NM_138401	+	1	37307	3.93777	3.45909	0.878439
EGFLAM	chr5	38257825	38259136	NM_001205301	+	1	87	0.275644	0.551983	2.00252
WASF3	chr13	27131568	27132677	NM_006646	+	1	250	1.14195	1.58235	1.38565
LOC100127983	chr8	91997230	91997906	NM_001190972	-	1	812	0	0	#DIV/0!
SNX32	chr11	65601069	65601551	NM_152760	+	1	1158	0.354399	0.0735977	0.207669
XKR5	chr8	6691833	6693135	NM_207411	-	1	2548	0	0	#DIV/0!
NRG1	chr8	32405407	32406901	NM_001160002	+	1	2668	0.748177	0.257592	0.344293
KAL1	chrX	8698857	8700500	NM_000216	-	1	3864	2.59893	0.846373	0.325662
CHST15	chr10	125851151	125853233	NM_001270764	-	1	3906	5.90666	4.63665	0.784988
ST3GAL6	chr3	98451286	98452225	NM_001271145	+	1	3923	0.472533	0.735977	1.55752
DKK2	chr4	107956555	107957453	NM_014421	-	1	4793	0	0	#DIV/0!
ZNF492	chr19	22817274	22817546	NM_020855	+	1	5085	0.472533	0	0
ELMO1	chr7	37487354	37488672	NM_001206480	-	1	6195	9.56879	5.18864	0.542246
MAGI2-AS3	chr7	79081565	79081879	NR_038345	+	1	6324	0.157511	0.110397	0.700882
HECW1	chr7	43152020	43153340	NM_015052	+	1	6572	0.0787554	0	0
SOX5	chr12	24714956	24716243	NM_001261414	-	1	7004	2.44142	1.17756	0.482327
PAX2	chr10	102503913	102506146	NM_003989	+	1	8008	0	0.0735977	#DIV/0!
SUSD5	chr3	33259919	33260763	NM_015551	-	1	8054	0	0.220793	#DIV/0!
ANKS1B	chr12	99288222	99289374	NM_001204079	-	1	8874	0.118133	0.0367988	0.311503
NPTX1	chr17	78449507	78452783	NM_002522	-	1	10069	2.55955	0.33119	0.129394
NBLA00301	chr4	174450046	174451469	NR_003679	+	1	10233	0.0393777	0	0
TCF4	chr18	53257018	53257309	NM_001243227	-	1	10642	21.7365	14.094	0.6484
VAT1L	chr16	77822375	77823134	NM_020927	+	1	11048	3.15022	2.50232	0.794333
BHLHE22	chr8	65492935	65494452	NM_152414	+	1	13123	0.315022	0	0
FAM19A5	chr22	48884884	48887043	NM_001082967	+	1	14404	0.472533	0.257592	0.54513
ZNF543	chr19	57831599	57832250	NM_213598	+	1	14495	2.44142	0.478385	0.195945
ZNF530	chr19	58111229	58111770	NM_020880	+	1	14912	1.53573	0.515184	0.335465
CCBE1	chr18	57363714	57365001	NM_133459	-	1	15278	0	0	#DIV/0!
GLI3	chr7	42276003	42277850	NM_000168	-	1	15414	5.00097	2.50232	0.500367
CNRIP1	chr2	68546339	68547111	NM_001111101	-	1	16062	1.02382	0.883172	0.862624
UNC5C	chr4	96469456	96469667	NM_003728	-	1	17009	4.64657	2.72311	0.586048
RUNX1T1	chr8	93114056	93115979	NM_175634	-	1	17953	3.42586	3.34869	0.977475
SHISA3	chr4	42399152	42400802	NM_001080505	+	1	18945	0.433155	0.0367988	0.0849554
NIM1	chr5	43191974	43193155	NR_072980	+	1	19378	0.354399	0.220793	0.623006
TCF24	chr8	67873388	67875600	NM_001193502	-	1	20186	0	0.147195	#DIV/0!
ANKLE1	chr19	17392383	17393775	NM_152363	+	1	21428	0.433155	0.0735977	0.169911
PDE1C	chr7	32110063	32110910	NM_001191056	-	1	21944	0.945065	0.515184	0.54513
MSC	chr8	72755783	72756667	NM_005098	-	1	22224	3.74088	2.39192	0.639401
PTPRO	chr12	15475318	15475901	NM_002848	+	1	23986	7.36363	6.99178	0.949501
CD40	chr20	44746822	44747060	NM_001250	+	1	24282	5.04035	0.735977	0.146017
HAND2	chr4	174450046	174451469	NM_021973	-	1	27086	0.196889	0	0
ZNF880	chr19	52873084	52873572	NM_001145434	+	1	27936	2.16577	0.294391	0.135929
VGLL3	chr3	87039610	87040516	NM_016206	-	1	28280	3.97715	1.54555	0.388608
MEIS1-AS3	chr2	66660452	66660794	NR_046438	-	1	28483	0	0.0735977	#DIV/0!
LOC100132891	chr8	72755783	72756667	NR_033651	+	1	29289	5.31599	5.66702	1.06603
MYO3A	chr10	26222921	26224022	NM_017433	+	1	29819	2.75644	0.33119	0.120151
PALM2	chr9	112402767	112403349	NM_001037293	+	1	30195	0.630044	0.588781	0.934509
CAMK2N2	chr3	183977548	183980633	NM_033259	-	1	30509	0.0393777	0.0367988	0.934509
LOC100652791	chr8	6691833	6693135	NR_045217	+	1	30565	0.157511	0.294391	1.86902
ABCC8	chr11	17497463	17498626	NM_000352	-	1	30734	1.37822	0.110397	0.0801008
ST3GAL6-AS1	chr3	98451286	98452225	NR_046683	-	1	32286	0.0787554	0	0
PLXNA4	chr7	132260474	132262527	NM_001105543	-	1	34578	0.157511	0.147195	0.934509
C9orf50	chr9	132382432	132383004	NM_199350	-	1	35594	0.275644	0.735977	2.67003
TMEM163	chr2	135475698	135476993	NM_030923	-	1	36266	1.18133	0.441586	0.373804
FEV	chr2	219848919	219850541	NM_017521	-	1	36471	1.0632	0.0367988	0.0346115
EDIL3	chr5	83679584	83680720	NM_005711	-	1	36558	20.5158	9.16291	0.446627
CLGN	chr4	141348042	141348957	NM_004362	-	1	36610	1.61449	0.110397	0.0683787
ZNF781	chr19	38182793	38183327	NM_152605	-	1	36829	0.0787554	0	0
LRRC3B	chr3	26664104	26664796	NM_052953	+	1	37161	0.0787554	0.147195	1.86902
CRLF1	chr19	18716229	18718743	NM_004750	-	1	40035	0	0.0735977	#DIV/0!
SLC26A5	chr7	103085710	103086132	NM_206884	-	1	2022	0.118133	0	0
GPC5	chr13	92051153	92051716	NM_004466	+	1	8121	1.18133	0.110397	0.0934509
KCNIP4	chr4	21950085	21950346	NM_147182	-	1	16103	0.472533	2.09753	4.43892
ZMAT4	chr8	40755164	40755404	NM_001135731	-	1	19253	0.118133	0	0
ZFP82	chr19	36909281	36909854	NM_133466	-	1	23325	0.472533	0.220793	0.467255
SYNE1	chr6	152957810	152958472	NM_033071	-	1	27891	33.9042	21.9321	0.646884
BCAT1	chr12	25101607	25102073	NM_001178092	-	1	2345	2.75644	1.65595	0.600756
ZNF610	chr19	52839444	52839937	NM_001161425	+	1	13366	0.315022	0.0735977	0.233627
SLC47A1	chr17	19436788	19437692	NM_018242	+	1	291	1.18133	0.478385	0.404954
PPP2R2B	chr5	146257346	146258575	NM_001271948	-	1	717	0.354399	0.0367988	0.103834
STAC2	chr17	37380953	37382363	NM_198993	-	1	1459	0	0	#DIV/0!
NCAM1	chr11	112832524	112834490	NM_001242607	+	1	1750	2.87457	2.24473	0.780891
SELV	chr19	40005648	40005869	NM_182704	+	1	1890	0	0	#DIV/0!
APBB1	chr11	6439863	6440732	NR_047512	-	1	2570	1.26009	0.404787	0.321238
CNKSR2	chrX	21391835	21393408	NM_001168649	+	1	2868	0.748177	0.147195	0.196739
GJC1	chr17	42906810	42908061	NM_005497	-	1	3950	1.4176	0.735977	0.519172
ZNF790	chr19	37328896	37329518	NM_001242802	-	1	4101	1.02382	0.33119	0.323484
AGXT2L1	chr4	109683729	109684362	NM_001146627	-	1	4120	0	0	#DIV/0!
THEGL	chr4	57396748	57397269	NM_001256475	+	1	4679	0	0	#DIV/0!
SYT6	chr1	114695136	114696672	NM_001270805	-	1	5132	0	0	#DIV/0!
GPR101	chrX	136113583	136114232	NM_054021	-	1	5437	0	0	#DIV/0!
AFAP1L1	chr5	148650920	148651772	NM_001146337	+	1	5665	1.02382	0.993569	0.970452
ST8SIA5	chr18	44336183	44337110	NM_013305	-	1	5756	0.118133	0.0367988	0.311503
LOC285484	chr4	6200912	6202724	NR_037863	+	1	6950	0.0787554	0	0
WDR17	chr4	176986921	176987360	NM_181265	+	1	7509	0.748177	0.0735977	0.0983694
ST8SIA4	chr5	100238722	100239138	NM_175052	-	1	9409	1.37822	1.39836	1.01461
DPP10	chr2	115918737	115920765	NM_001004360	+	1	9434	5.15848	0.110397	0.021401
CHST10	chr2	101033606	101034296	NM_004854	-	1	9757	0.551288	0.662379	1.20151
KAZN	chr1	14924610	14925993	NM_201628	+	1	10304	2.55955	2.79671	1.09266
LOC401463	chr8	65488536	65489116	NR_015374	-	1	11502	0.0393777	0	0
BTG4	chr11	111383168	111383892	NM_017589	-	1	11667	0	0	#DIV/0!
MIR129-2	chr11	43602545	43603215	NR_029697	+	1	12439	0	0	#DIV/0!
LHFPL3	chr7	103968783	103969959	NM_199000	+	1	12983	0.354399	0.147195	0.415337
CNTN4	chr3	2140029	2141784	NM_175607	+	1	13323	1.772	1.80314	1.01758
NTRK3	chr15	88799522	88801017	NM_001012338	-	1	13345	0.393777	0.147195	0.373804
RIC3	chr11	8190226	8190671	NM_001206672	-	1	13993	1.26009	0.257592	0.204424
PPM1E	chr17	56832961	56833986	NM_014906	+	1	14076	0.354399	0.183994	0.519172
JAKMIP1	chr4	6200912	6202724	NM_144720	-	1	14168	0.472533	0.0735977	0.155752
ZDHHC22	chr14	77605885	77608304	NM_174976	-	1	15552	0.0787554	0	0
VTN	chr17	26698359	26699557	NM_000638	-	1	15707	0.0787554	0.0367988	0.467255
CCDC177	chr14	70041213	70041662	NM_001271507	-	1	15740	0	0	#DIV/0!
UBE2QL1	chr5	6448753	6449629	NM_001145161	+	1	16640	0.275644	0.588781	2.13602
KATNAL2	chr18	44526866	44527137	NM_031303	+	1	16683	0.984443	1.61915	1.64474
GPR88	chr1	101004471	101005885	NM_022049	+	1	17676	0	0.0735977	#DIV/0!
TBC1D30	chr12	65218245	65219143	NM_015279	+	1	20431	6.77297	9.6045	1.41806
ASCL1	chr12	103351579	103352695	NM_004316	+	1	20632	0.118133	0	0
SLFN11	chr17	33700487	33700760	NM_001104588	-	1	20838	8.34808	5.29903	0.634761
TMEFF2	chr2	193058995	193060812	NM_016192	-	1	21860	0	0	#DIV/0!
SVEP1	chr9	113341213	113342029	NM_153366	-	1	22870	2.1264	3.34869	1.57482
FSTL4	chr5	132946744	132948467	NM_015082	-	1	23603	0.393777	0.147195	0.373804
ZNF264	chr19	57702696	57703425	NM_003417	+	1	24039	22.5241	5.11504	0.227092
DPY19L2P4	chr7	89747892	89749036	NR_003551	+	1	24706	0	0.147195	#DIV/0!
RNF150	chr4	142053327	142054601	NM_020724	-	1	25969	1.49635	0.367988	0.245923
ZNF606	chr19	58513455	58514498	NM_025027	-	1	26959	2.59893	4.52626	1.74159
HDGFRP3	chr15	83875648	83877079	NM_016073	-	1	28271	5.94604	1.80314	0.303251
MIR34C	chr11	111383168	111383892	NR_029840	+	1	28387	0	0	#DIV/0!
B3GAT2	chr6	71665360	71667132	NM_080742	-	1	28975	6.41857	6.2926	0.980375
KIRREL3	chr11	126870226	126870552	NM_032531	-	1	29046	0.984443	0	0
LOC389023	chr2	115918737	115920765	NR_036580	-	1	29885	0.708799	0	0
KCNK10	chr14	88792904	88793324	NM_021161	-	1	30347	1.96889	2.98071	1.5139
VWC2	chr7	49813008	49815752	NM_198570	+	1	30518	0.157511	0.0735977	0.467255
ADAMTS1	chr21	28216558	28218117	NM_006988	-	1	30814	21.1065	2.72311	0.129018
LOC100288974	chr10	81664389	81665076	NR_033857	+	1	31451	0.275644	0.478385	1.73552
TMEM59L	chr19	18722358	18724001	NM_012109	+	1	31959	0.0393777	0.110397	2.80353
SARM1	chr17	26698359	26699557	NM_015077	+	1	32692	10.1201	21.6377	2.1381
PTX3	chr3	157155267	157155826	NM_002852	+	1	33204	0.275644	0.441586	1.60202
ZKSCAN7	chr3	44596535	44597018	NM_025169	+	1	34032	0.905688	0.147195	0.162523
WNT1	chr12	49371690	49375550	NM_005430	+	1	34574	0.433155	0.220793	0.509732
KCNK9	chr8	140714585	140718259	NM_016601	-	1	34717	0	0	#DIV/0!
PDE4A	chr19	10529627	10532004	NM_001111307	+	1	35085	5.43413	17.2587	3.17598
GREB1L	chr18	18821383	18823349	NM_001142966	+	1	35835	0.0787554	0.33119	4.20529
PIK3CD	chr1	9711780	9713001	NM_005026	+	1	37108	9.13563	6.73419	0.737134
ROR2	chr9	94711117	94713075	NM_004560	-	1	38019	3.15022	0.772776	0.245309
CACNA2D3	chr3	54155239	54157025	NM_018398	+	1	38139	0.196889	0.404787	2.05592
RPRM	chr2	154334449	154335458	NM_019845	-	1	38395	0	0	#DIV/0!
GPR139	chr16	20084707	20085305	NM_001002911	-	1	38687	0	0	#DIV/0!
LOC100128398	chr19	58513455	58514498	NR_036508	+	1	39015	1.02382	0.404787	0.395369
GSX2	chr4	54966163	54968063	NM_133267	+	1	39524	0	0	#DIV/0!
ZSWIM2	chr2	187713846	187714069	NM_182521	-	1	39779	0	0	#DIV/0!
MIR34B	chr11	111383168	111383892	NR_029839	+	1	39987	0	0	#DIV/0!
HAND1	chr5	153857038	153859113	NM_004821	-	1	84	0	0	#DIV/0!
C1orf51	chr1	150254365	150254637	NM_144697	+	1	142	0.590666	0.404787	0.685307
GALNT18	chr11	11642121	11643819	NM_198516	-	1	262	4.09528	1.28796	0.314498
GSTM2	chr1	110210581	110210956	NM_000848	+	1	656	4.25279	6.14541	1.44503
LOC100289092	chr16	28890954	28891868	NR_046288	-	1	848	0.196889	0.0367988	0.186902
NELL1	chr11	20690579	20691845	NM_006157	+	1	1164	0	0.110397	#DIV/0!
GUCY1A3	chr4	156588297	156589292	NM_000856	+	1	1508	3.38648	4.34226	1.28223
CERKL	chr2	182521221	182521927	NR_027689	-	1	2722	4.68595	3.0175	0.643947
CNTN1	chr12	41086522	41087102	NM_001256063	+	1	2826	0.472533	0.147195	0.311503
CD34	chr1	208084098	208084513	NM_001773	-	1	3329	5.86728	5.48303	0.934509
ARMC4	chr10	28287447	28288057	NM_018076	-	1	3966	0	0	#DIV/0!
BMP6	chr6	7726095	7728161	NM_001718	+	1	4978	9.49003	11.702	1.23309
CNR1	chr6	88875397	88877449	NM_001160226	-	1	5005	1.96889	0.588781	0.299043
GRIA4	chr11	105481126	105481422	NR_046356	+	1	5269	0.433155	0.404787	0.934509
ZNF730	chr19	23299727	23300167	NM_001277403	+	1	5275	0.393777	0	0
ITGA4	chr2	182321761	182323029	NM_000885	+	1	5482	11.9314	7.13898	0.598333
PCDH11X	chrX	91033993	91034623	NM_032967	+	1	6575	1.69324	0	0
ADAMTS19	chr5	128795503	128797417	NM_133638	+	1	6659	0.236266	0.33119	1.40176
RERG	chr12	15373986	15374514	NM_032918	-	1	6717	0.787554	1.06717	1.35504
DPYSL5	chr2	27070302	27072922	NM_001253723	+	1	6984	0	0.0367988	#DIV/0!
CELF2	chr10	11207178	11207980	NM_001025076	+	1	7006	46.5445	50.5616	1.08631
DYDC2	chr10	82116202	82117120	NM_001270041	+	1	7013	0	0	#DIV/0!
SPG20	chr13	36919737	36921004	NM_001142295	-	1	7389	4.88284	1.39836	0.286382
LOC146880	chr17	62774366	62777797	NR_026899	-	1	7642	8.70248	12.5852	1.44616
KCNQ5	chr6	73330942	73333109	NM_001160134	+	1	7657	1.22071	0.220793	0.180873
NEUROG1	chr5	134870740	134872051	NM_006161	-	1	8356	0	0	#DIV/0!
ESR1	chr6	152128822	152129771	NM_000125	+	1	9101	0.748177	0.147195	0.196739
ZNF544	chr19	58739943	58740554	NM_014480	+	1	9555	4.05591	5.26223	1.29743
EFEMP1	chr2	56150340	56151180	NM_001039348	-	1	9720	5.35537	7.58056	1.41551
PRICKLE1	chr12	42982832	42983881	NM_153026	-	1	10148	2.32329	3.53269	1.52056
C12orf42	chr12	103889148	103889843	NM_001099336	-	1	10214	0.0393777	0	0
PDZRN4	chr12	41582155	41582975	NM_001164595	+	1	10227	0.118133	0.110397	0.934509
MOXD1	chr6	132722093	132722901	NM_015529	-	1	10410	4.01653	4.93104	1.22769
FLNC	chr7	128470443	128471161	NM_001127487	+	1	10470	38.3145	2.68632	0.0701122
CCDC178	chr18	31020510	31020847	NM_198995	-	1	10970	0	0	#DIV/0!
ZSCAN12	chr6	28367124	28367651	NR_028077	-	1	11289	3.03208	2.68632	0.885963
CR1	chr1	207669637	207670015	NM_000651	+	1	11300	10.1595	0.95677	0.0941753
EFCAB1	chr8	49647702	49647988	NM_024593	-	1	12184	0	0.294391	#DIV/0!
SYNDIG1	chr20	24449844	24452037	NM_024893	+	1	12482	0.196889	0	0
IGF2BP3	chr7	23508184	23509712	NM_006547	-	1	12691	0.354399	0.441586	1.24601
HYDIN	chr16	71264360	71264659	NM_017558	-	1	12940	0.315022	0.0367988	0.116814
ALX1	chr12	85673878	85674700	NM_006982	+	1	13688	0	0	#DIV/0!
FAM110B	chr8	58907001	58907822	NM_147189	+	1	14636	1.4176	0.478385	0.337462
LINC00643	chr14	62583679	62584279	NR_015358	+	1	15995	0	0	#DIV/0!
DMRTA1	chr9	22446681	22447695	NM_022160	+	1	17642	0.157511	0.0735977	0.467255
DIRAS1	chr19	2720630	2721783	NM_145173	-	1	17658	0.945065	0.515184	0.54513
GPR37	chr7	124404700	124406189	NM_005302	-	1	20953	0.236266	0.0735977	0.311503
NID1	chr1	236227682	236228817	NM_002508	-	1	21101	16.6568	19.4298	1.16648
SPG20OS	chr13	36919737	36921004	NR_045181	+	1	22067	0.0787554	0	0
CCK	chr3	42304944	42305311	NM_001174138	-	1	22597	0.787554	0	0
DYDC1	chr10	82116202	82117120	NM_138812	-	1	22733	0	0	#DIV/0!
CUX2	chr12	111471061	111471578	NM_015267	+	1	22787	0.0393777	0	0
DOK5	chr20	53091733	53092993	NM_018431	+	1	25525	1.49635	0.147195	0.0983694
FAM72D	chr1	143912736	143916156	NM_207418	-	1	26199	0.984443	0.367988	0.373804
DOK6	chr18	67067509	67069168	NM_152721	+	1	27882	0.354399	0.993569	2.80353
GLB1L3	chr11	134145559	134147180	NM_001080407	+	1	28190	0	0	#DIV/0!
RELN	chr7	103629525	103630652	NM_005045	-	1	28885	0.708799	0.294391	0.415337
SLC30A3	chr2	27484873	27488189	NM_003459	-	1	29168	0	0	#DIV/0!
HTR5A	chr7	154861797	154862074	NM_024012	+	1	30940	0	0	#DIV/0!
LOC100287846	chr8	48100163	48100914	NR_037168	+	1	31271	0.315022	0.0367988	0.116814
FOXG1	chr14	29234889	29235908	NM_005249	+	1	31840	0	0	#DIV/0!
NPR1	chr1	153650830	153652375	NM_000906	+	1	35308	1.22071	0.257592	0.211018
TBX5	chr12	114843022	114843610	NM_181486	-	1	38184	0	0	#DIV/0!
POM121L2	chr6	27279794	27280635	NM_033482	-	1	3935	0.196889	0.33119	1.68212
FMN2	chr1	240254959	240257063	NM_020066	+	1	8084	6.65483	0.735977	0.110593
PDE8B	chr5	76506029	76507189	NM_001029854	+	1	20450	2.00826	2.35513	1.17272
RADIL	chr7	4922707	4923576	NM_018059	-	1	33243	0.236266	0.147195	0.623006
ZNF83	chr19	53193139	53193945	NM_001242538	-	1	788	3.89839	4.59986	1.17994
C8orf42	chr8	494155	496083	NM_175075	-	1	1254	5.59164	1.91354	0.342215
DNAH11	chr7	21582443	21583313	NM_001277115	+	1	1909	5.8279	7.35977	1.26285
FADS1	chr11	61582573	61584728	NM_013402	-	1	2170	4.92222	2.20793	0.448564
ADAM8	chr10	135089969	135090491	NM_001109	-	1	5791	3.81964	1.32476	0.346828
ZNF550	chr19	58070553	58071273	NM_001277092	-	1	6594	3.81964	2.61272	0.684022
ALOX15P1	chr17	6559363	6560803	NR_045985	+	1	6715	0.0787554	0	0
SOX21	chr13	95363152	95366051	NM_007084	-	1	12084	0	0	#DIV/0!
C16orf45	chr16	15528350	15529086	NM_033201	+	1	16725	2.75644	0.993569	0.360454
NHSL2	chrX	71130679	71131820	NM_001013627	+	1	17943	1.4176	1.47195	1.03834
SUSD4	chr1	223536842	223538628	NM_017982	-	1	18148	0.196889	0.0735977	0.373804
CADM1	chr11	115373574	115375881	NM_001098517	-	1	20514	4.88284	2.68632	0.550155
TMEM74	chr8	109799429	109799847	NM_153015	-	1	21400	0	0.0735977	#DIV/0!
ABR	chr17	1082376	1083833	NM_021962	-	1	22060	83.5595	103.074	1.23353
DACH2	chrX	85402943	85403877	NM_053281	+	1	22360	0	0	#DIV/0!
WNT7A	chr3	13919939	13922335	NM_004625	-	1	23453	0	0	#DIV/0!
SFRP2	chr4	154709512	154710827	NM_003013	-	1	23606	0.472533	0.183994	0.389379
MMP17	chr12	132312439	132315739	NM_016155	+	1	24766	0.0787554	0.0735977	0.934509
EGFL6	chrX	13587648	13588221	NM_001167890	+	1	26638	0	0.0367988	#DIV/0!
DMRT3	chr9	976162	977828	NM_021240	+	1	30731	0	0	#DIV/0!
ICAM1	chr19	10380287	10381965	NM_000201	+	1	36233	8.46621	9.3837	1.10837
MAMLD1	chrX	149529540	149534090	NM_001177465	+	1	36272	1.4176	1.21436	0.856633
ALX4	chr11	44330542	44331761	NM_021926	-	1	38249	0.590666	0.110397	0.186902
MIR1908	chr11	61582573	61584728	NR_031729	-	1	39605	0	0	#DIV/0!
HIST1H4L	chr6	27841001	27841244	NM_003546	-	1	40788	0.118133	0	0
VEGFC	chr4	177713243	177714457	NM_005429	-	1	40970	0.472533	0.95677	2.02477
LOC440461	chr17	66192363	66195873	NR_027283	+	1	345	0	0	#DIV/0!
EGR2	chr10	64574660	64578778	NM_000399	-	1	424	3.38648	1.03037	0.304259
HLTF-AS1	chr3	148803904	148804557	NR_046648	+	1	504	0.315022	0	0
UNC5A	chr5	176236761	176238081	NM_133369	+	1	911	0.118133	0	0
PLCG2	chr16	81812710	81813707	NM_002661	+	1	946	12.3252	2.64952	0.214967
BAIAP3	chr16	1382916	1384735	NM_001199099	+	1	1129	4.33155	3.79028	0.87504
NTRK1	chr1	156828804	156831102	NM_001012331	+	1	1294	0.196889	0	0
MIR4787	chr3	50712068	50713007	NR_039950	+	1	1304	0	0	#DIV/0!
ZNF419	chr19	57999025	57999613	NM_001098494	+	1	1576	0.905688	1.36156	1.50334
SEZ6L	chr22	26565199	26565986	NM_001184776	+	1	1721	0	0.0367988	#DIV/0!
TBL1Y	chrY	6778574	6780028	NM_134258	+	1	1903	0.236266	0.294391	1.24601
BDNF	chr11	27743472	27744564	NM_170731	-	1	2500	0.433155	0.257592	0.594688
ARMCX4	chrX	100740221	100740601	NR_045862	+	1	2813	1.37822	4.78385	3.47103
LHX9	chr1	197880016	197881637	NM_001014434	+	1	2836	0.0393777	0	0
ZNF547	chr19	57874763	57875110	NM_173631	+	1	2894	0.905688	0.147195	0.162523
WNT5A	chr3	55520226	55522344	NM_003392	-	1	3082	2.87457	3.82708	1.33136
GSC	chr14	95234612	95236569	NM_173849	-	1	3482	0	0	#DIV/0!
ULK4P2	chr15	30864782	30865586	NR_027470	+	1	3759	0.236266	0	0
ZNF347	chr19	53661430	53661848	NM_001172675	-	1	3783	1.89013	0.588781	0.311503
DYSF	chr2	71680558	71681276	NM_001130978	+	1	3922	2.00826	1.28796	0.64133
DNM3	chr1	171810467	171811325	NM_001136127	+	1	3942	0.86631	1.06717	1.23185
TBX15	chr1	119531991	119532196	NM_152380	-	1	4240	0.0787554	0.0735977	0.934509
FAM133A	chrX	92928546	92928786	NM_001171110	+	1	4582	0	0	#DIV/0!
TNPO2	chr19	12831793	12832225	NM_013433	-	1	4661	26.1862	28.2983	1.08066
BAALC	chr8	104152726	104153390	NM_024812	+	1	5674	0.393777	0.33119	0.841058
CH25H	chr10	90967555	90967900	NM_003956	-	1	5878	2.1264	3.71668	1.74788
ATP1B2	chr17	7554139	7555338	NM_001678	+	1	5951	0.472533	0.294391	0.623006
ZNF542	chr19	56879417	56879995	NR_024057	+	1	6043	1.4176	0.33119	0.233627
TWIST1	chr7	19156050	19158042	NM_000474	-	1	6414	0.236266	0.0735977	0.311503
SOX2	chr3	181430141	181431076	NM_003106	+	1	6923	0	0	#DIV/0!
VAV3	chr1	108507251	108507841	NM_006113	-	1	8118	77.1016	131.556	1.70627
NTF3	chr12	5539895	5540703	NM_001102654	+	1	8280	0.0393777	0.147195	3.73804
TSHZ2	chr20	51589707	51590020	NM_173485	+	1	8699	2.79582	2.53912	0.908185
NTNG2	chr9	135036713	135038933	NM_032536	+	1	8848	0.0393777	0	0
CBLN2	chr18	70208974	70211790	NM_182511	-	1	9112	1.4176	0.294391	0.207669
SEMA6D	chr15	47476369	47477499	NM_001198999	+	1	9151	42.9217	20.497	0.477543
ZNF701	chr19	53073308	53074039	NM_001172655	+	1	9299	12.2465	5.29903	0.432699
FEZ1	chr11	125365137	125366319	NM_022549	-	1	9535	0.236266	0.220793	0.934509
PXDN	chr2	1746833	1748971	NM_012293	-	1	9818	8.93874	14.3147	1.60143
SYT3	chr19	51142284	51142986	NM_032298	-	1	10172	0.0787554	0	0
MIR4281	chr5	176056520	176057494	NR_036239	-	1	10380	0	0	#DIV/0!
OLFM1	chr9	137967110	137967727	NM_014279	+	1	10662	11.9708	2.02394	0.169072
NKX2-5	chr5	172661486	172662228	NM_004387	-	1	10739	0	0	#DIV/0!
IRF4	chr6	391188	393790	NR_046000	+	1	10786	12.6009	21.4169	1.69964
SHISA9	chr16	12994574	12997690	NM_001145205	+	1	10927	0	0.147195	#DIV/0!
DDN	chr12	49390617	49392441	NM_015086	-	1	10945	0	0.0735977	#DIV/0!
LAYN	chr11	111410932	111412199	NM_001258390	+	1	11566	1.26009	0.441586	0.350441
KL	chr13	33589928	33591428	NM_004795	+	1	11890	1.0632	1.14076	1.07295
FAM72A	chr1	206135444	206138863	NM_001123168	+	1	12023	1.02382	0.257592	0.251599
AMOTL1	chr11	94501366	94502696	NM_130847	+	1	12904	9.68692	4.93104	0.509042
GATA4	chr8	11559596	11562956	NM_002052	+	1	12974	0	0	#DIV/0!
FAM65B	chr6	24910626	24911285	NM_014722	-	1	13672	10.3563	2.50232	0.241622
UTF1	chr10	135043221	135044560	NM_003577	+	1	13827	0	0	#DIV/0!
ADCY1	chr7	45613386	45615504	NM_021116	+	1	14153	3.15022	0.846373	0.268671
COL12A1	chr6	75914705	75916387	NM_080645	-	1	14369	6.22168	15.1611	2.43682
FAM43B	chr1	20878894	20880592	NM_207334	+	1	14696	0	0	#DIV/0!
KCNK17	chr6	39281135	39282215	NM_031460	-	1	14711	0	0	#DIV/0!
RASGRF1	chr15	79381804	79384209	NM_001145648	-	1	15199	0.748177	0.147195	0.196739
SHISA7	chr19	55953371	55954641	NM_001145176	-	1	15653	0	0	#DIV/0!
RIMS2	chr8	104510870	104513913	NM_001100117	+	1	15686	0.0787554	0	0
VAV3-AS1	chr1	108507251	108507841	NR_046653	+	1	16068	0.118133	0	0
DGKG	chr3	186078710	186080111	NM_001080745	-	1	16177	0.905688	0.257592	0.284416
GMPPA	chr2	220361462	220363254	NM_013335	+	1	16232	21.1852	13.6892	0.646166
MRC2	chr17	60704542	60705943	NM_006039	+	1	16677	2.32329	2.17113	0.934509
EIF4E1B	chr5	176056520	176057494	NM_001099408	+	1	16775	0	0	#DIV/0!
C20orf201	chr20	62714763	62715761	NM_001007125	-	1	16916	0	0	#DIV/0!
SMOC1	chr14	70345943	70346527	NM_001034852	+	1	17491	0.669421	0	0
C7orf57	chr7	48074838	48075985	NM_001100159	+	1	18109	0	0.0735977	#DIV/0!
TRAPPC2P1	chr19	57874763	57875110	NR_002166	+	1	18175	3.70151	1.98714	0.536846
KIF26A	chr14	104601959	104605672	NM_015656	+	1	18532	1.10258	0.110397	0.100126
VSX2	chr14	74706188	74708192	NM_182894	+	1	18836	0	0	#DIV/0!
EPHA7	chr6	94126272	94129677	NM_004440	-	1	18947	1.02382	2.57592	2.51599
C8orf56	chr8	104152726	104153390	NR_027071	-	1	19026	0	0	#DIV/0!
PTCHD2	chr1	11538669	11540342	NM_020780	+	1	19057	0	0.0367988	#DIV/0!
SH3GL3	chr15	84115762	84116921	NR_026799	+	1	19099	0	0	#DIV/0!
STARD8	chrX	67913299	67914134	NM_001142504	+	1	19226	0.905688	0.257592	0.284416
HLTF	chr3	148803904	148804557	NM_003071	-	1	19726	8.22994	1.43515	0.174382
ZNF570	chr19	37959852	37960615	NM_144694	+	1	19996	1.61449	0.699178	0.433065
DCLK1	chr13	36705040	36705707	NM_004734	-	1	20197	0.393777	0.183994	0.467255
KY	chr3	134369464	134370242	NM_178554	-	1	20507	0.236266	0.147195	0.623006
SPSB4	chr3	140769886	140771080	NM_080862	+	1	20659	0	0	#DIV/0!
DOCK3	chr3	50712068	50713007	NM_004947	+	1	20803	0.826932	1.03037	1.24601
TMEFF1	chr9	103235171	103236627	NM_003692	+	1	21025	0.236266	0.0735977	0.311503
CRISPLD1	chr8	75896528	75897116	NM_031461	+	1	21573	0.196889	0.0367988	0.186902
INSC	chr11	15136058	15136545	NM_001042536	+	1	21644	0.472533	0.735977	1.55752
ZNF334	chr20	45142000	45142337	NR_073026	-	1	22309	0.984443	0.147195	0.149521
SNTG2	chr2	945686	946774	NM_018968	+	1	22335	0.0393777	0.0735977	1.86902
TRIM71	chr3	32858194	32860506	NM_001039111	+	1	22967	0	0.0367988	#DIV/0!
GFRA1	chr10	118030732	118034230	NM_001145453	-	1	23282	2.71706	4.96784	1.82839
LOC400043	chr12	54519768	54520457	NR_026656	+	1	23302	0.787554	0.220793	0.280353
SLC18A2	chr10	119000435	119001530	NM_003054	+	1	23977	17.8775	26.532	1.4841
WNT6	chr2	219723702	219725010	NM_006522	+	1	24077	0	0.0735977	#DIV/0!
LAMP5	chr20	9495253	9495597	NM_001199897	+	1	24200	0.275644	0.147195	0.534005
NEUROD2	chr17	37761691	37763551	NM_006160	-	1	24356	0	0	#DIV/0!
PCDH9	chr13	67804593	67805459	NM_020403	-	1	24421	1.92951	0.257592	0.133501
ZDBF2	chr2	207139336	207140031	NM_020923	+	1	24765	6.96986	1.95034	0.279825
EPHA6	chr3	96532023	96533625	NM_001080448	+	1	25427	0.0393777	0	0
FBN1	chr15	48936810	48938577	NM_000138	-	1	25667	9.3719	10.3037	1.09942
SYN3	chr22	33453892	33454505	NM_001135774	-	1	25865	0	5.04144	#DIV/0!
KCND2	chr7	119912840	119913883	NM_012281	+	1	25958	0.0787554	0	0
VIM	chr10	17270430	17272617	NM_003380	+	1	26726	122.543	67.8203	0.553438
INSRR	chr1	156828804	156831102	NM_014215	-	1	26952	0.0393777	0	0
TMEM196	chr7	19812569	19813005	NM_152774	-	1	27615	0	0	#DIV/0!
OPRL1	chr20	62714763	62715761	NM_001200019	+	1	28890	0.433155	0.183994	0.424777
HOXC4	chr12	54447744	54448091	NM_153633	+	1	29020	0.236266	0.0735977	0.311503
LINC00693	chr3	28616663	28617970	NR_038840	+	1	29139	0.0787554	0	0
ZNF229	chr19	44952416	44952809	NM_014518	-	1	29836	0.315022	0.0735977	0.233627
TRIB2	chr2	12856625	12859019	NR_027303	+	1	30787	3.34711	4.59986	1.37428
DAB1	chr1	58715272	58716095	NM_021080	-	1	30816	0.118133	0.183994	1.55752
SNCB	chr5	176056520	176057494	NM_003085	-	1	31146	0	0	#DIV/0!
VGLL2	chr6	117586482	117587156	NM_182645	+	1	31301	0	0	#DIV/0!
SLC16A12	chr10	91294947	91295925	NM_213606	-	1	32404	0.0787554	0	0
KIRREL	chr1	157963540	157963947	NM_018240	+	1	32472	2.91395	1.72955	0.59354
ITGA8	chr10	15761423	15762101	NM_003638	-	1	32982	2.00826	3.42229	1.7041
DPY19L2P1	chr7	35225363	35226580	NR_002833	-	1	33111	0	0	#DIV/0!
PHF21B	chr22	45403036	45406372	NM_001242450	-	1	33190	0.0393777	0	0
FGF9	chr13	22243259	22245362	NM_002010	+	1	33391	1.69324	1.32476	0.78238
NAP1L3	chrX	92928546	92928786	NM_004538	-	1	33649	0.354399	0.147195	0.415337
GABBR2	chr9	101469579	101472154	NM_005458	-	1	34005	0.236266	0.0367988	0.155752
TUB	chr11	8102358	8102913	NM_177972	+	1	34181	1.61449	0.551983	0.341894
FAM69C	chr18	72123606	72124717	NM_001044369	-	1	34282	0	0	#DIV/0!
ANKRD34B	chr5	79864842	79866447	NM_001004441	-	1	34714	0.0787554	0	0
COL14A1	chr8	121137099	121137778	NM_021110	+	1	35174	7.67866	5.40943	0.704476
NXN	chr17	881733	883381	NM_022463	-	1	35184	1.29946	0.993569	0.764598
MIR9-1	chr1	156390403	156391581	NR_029691	-	1	35515	0	0	#DIV/0!
TUBB2B	chr6	3227025	3229688	NM_178012	-	1	35520	17.3262	4.82065	0.278229
C9orf171	chr9	135285310	135285897	NM_207417	+	1	35570	0	0.0735977	#DIV/0!
CCDC8	chr19	46916587	46916862	NM_032040	-	1	35670	0.393777	0.147195	0.373804
FAM126A	chr7	23052971	23054002	NM_032581	-	1	36110	5.1191	3.3119	0.646968
RNF220	chr1	44871109	44874047	NM_018150	+	1	36221	29.1789	32.1622	1.10224
MXRA5	chrX	3263353	3265347	NM_015419	-	1	36279	17.6018	28.9975	1.64741
DLX4	chr17	48045788	48047207	NM_138281	+	1	36898	0.0393777	0.183994	4.67255
EBF2	chr8	25900562	25905842	NM_022659	-	1	37300	0	0.110397	#DIV/0!
MED12L	chr3	150802996	150805168	NM_053002	+	1	38410	1.02382	0.147195	0.143771
RPS6KA2	chr6	167039962	167041679	NM_021135	-	1	38688	11.262	6.91818	0.614293
ABHD8	chr19	17413733	17414486	NM_024527	-	1	38744	0.86631	0.404787	0.467255
ADAMTS8	chr11	130297401	130298517	NM_007037	-	1	39712	0.787554	0.735977	0.934509
PNPLA5	chr22	44287497	44288061	NM_138814	-	1	40487	0	0	#DIV/0!
WNT3	chr17	44895800	44897025	NM_030753	-	1	40726	1.45698	1.06717	0.732453
DSCAML1	chr11	117666634	117668141	NM_020693	-	1	40769	2.20515	0.551983	0.250315
LRP1B	chr2	142887724	142888553	NM_018557	-	1	40834	0.0393777	0.0367988	0.934509
GYPC	chr2	127413696	127414171	NM_016815	+	1	1190	2.87457	1.69275	0.588869
MYO5A	chr15	52820333	52821639	NM_000259	-	1	1292	17.8381	12.7324	0.713775
RAB11FIP4	chr17	29718230	29719291	NM_032932	+	1	3854	39.0233	34.0021	0.871328
SNCA	chr4	90758008	90758870	NM_001146054	-	1	4053	0.196889	0.294391	1.49521
FAM78B	chr1	166134258	166136448	NM_001017961	-	1	4163	0.275644	0.551983	2.00252
C8orf34	chr8	69242920	69243803	NM_052958	+	1	4171	0	0	#DIV/0!
TUSC3	chr8	15397636	15398287	NM_178234	+	1	4533	7.99368	0.551983	0.0690524
LOC286189	chr8	69242920	69243803	NR_038877	-	1	4754	0	0	#DIV/0!
MAGI2	chr7	79082174	79082427	NM_012301	-	1	5414	0.708799	0.846373	1.1941
CDH22	chr20	44935932	44937310	NM_021248	-	1	5956	0.157511	0	0
SDK2	chr17	71639028	71641670	NM_001144952	-	1	6768	5.70977	1.32476	0.232016
SLIT3	chr5	168727429	168728275	NM_003062	-	1	7575	5.70977	4.59986	0.805611
LOC644248	chr4	90758008	90758870	NR_045481	+	1	8393	0	0	#DIV/0!
SLC1A6	chr19	15090016	15090873	NM_001272088	-	1	9030	0	0	#DIV/0!
LPPR5	chr1	99469932	99470968	NM_001010861	-	1	9708	0	0	#DIV/0!
ST6GALNAC5	chr1	77333111	77334534	NM_030965	+	1	11400	0.826932	0.0367988	0.0445004
KCNK13	chr14	90526696	90528951	NM_022054	+	1	11962	0.236266	0.0367988	0.155752
SLCO4C1	chr5	101632049	101632373	NM_180991	-	1	12390	1.61449	0.294391	0.182343
DOCK2	chr5	169064270	169064702	NM_004946	+	1	12415	15.6723	5.11504	0.326374
ZNF594	chr17	5094839	5095456	NM_032530	-	1	12466	1.4176	1.95034	1.37581
SFTA3	chr14	36983440	36983738	NM_001101341	-	1	12602	0	0	#DIV/0!
ADAMTS2	chr5	178770724	178772794	NM_014244	-	1	13832	1.772	1.28796	0.72684
PTPN5	chr11	18812572	18814079	NM_006906	-	1	13943	0.196889	0	0
RRP15	chr1	218458019	218458684	NM_016052	+	1	14238	11.9314	21.1593	1.77341
CPNE8	chr12	39299248	39299629	NM_153634	-	1	14334	32.3685	2.72311	0.0841286
FAM72B	chr1	120835961	120839391	NM_001100910	+	1	16106	1.0632	0.478385	0.449949
ZNF814	chr19	58399945	58400276	NM_001144989	-	1	16579	4.80408	4.93104	1.02643
FIGN	chr2	164592917	164593511	NM_018086	-	1	17193	0.590666	1.25116	2.11822
ACOT12	chr5	80689818	80690228	NM_130767	-	1	17235	0	0	#DIV/0!
NECAB1	chr8	91803656	91804141	NM_022351	+	1	17801	0.118133	0.0367988	0.311503
SEPT5-GP1BB	chr22	19705510	19706557	NR_037611	+	1	18445	0.551288	0.257592	0.467255
ATP8A2	chr13	25945993	25946953	NM_016529	+	1	18684	0.315022	0	0
DZIP1	chr13	96296143	96297059	NM_198968	-	1	18756	1.81138	0.95677	0.528201
LRPAP1	chr4	3533643	3534788	NM_002337	-	1	18777	83.4414	47.0657	0.564057
SMO	chr7	128828333	128829366	NM_005631	+	1	19451	0.945065	0.919971	0.973447
ST8SIA2	chr15	92936677	92938521	NM_006011	+	1	19858	0	0	#DIV/0!
NPY	chr7	24323558	24325080	NM_000905	+	1	20413	0.0787554	0.110397	1.40176
SLC35F1	chr6	118228042	118229811	NM_001029858	+	1	21373	0.275644	0.367988	1.33501
KCNAB1	chr3	156008991	156009320	NM_172159	+	1	21885	4.17404	3.0911	0.740554
FOXI3	chr2	88751335	88752865	NM_001135649	-	1	22038	0	0	#DIV/0!
ADAP2	chr17	29248847	29249926	NM_018404	+	1	22449	3.1896	2.17113	0.680692
PPP1R3C	chr10	93392667	93393147	NM_005398	-	1	24724	0.669421	0.441586	0.659654
ANTXR1	chr2	69240083	69241004	NM_053034	+	1	27389	2.63831	2.68632	1.0182
SEPT5	chr22	19705510	19706557	NM_001009939	+	1	27805	0.433155	0.0367988	0.0849554
GUCY1B3	chr4	156680095	156681386	NM_000857	+	1	27846	1.49635	0.95677	0.639401
SPATA32	chr17	43339124	43339832	NM_152343	-	1	28142	0.275644	0.147195	0.534005
NALCN	chr13	102068116	102069258	NM_052867	-	1	28534	0.0787554	0.0735977	0.934509
GPC6	chr13	93879245	93880877	NM_005708	+	1	28692	5.00097	4.37906	0.875642
LOC100129620	chr1	99469932	99470968	NR_033940	+	1	28709	0	0	#DIV/0!
KHDRBS2	chr6	62995855	62996228	NM_152688	-	1	28806	0.630044	0	0
LOC100130950	chr17	5094839	5095456	NR_034082	+	1	28958	0.905688	0.515184	0.568832
THY1	chr11	119293320	119293943	NM_006288	-	1	30854	7.08799	3.93748	0.555514
MGMT	chr10	131264948	131265710	NM_002412	+	1	31983	6.69421	3.97427	0.593688
GUCY1A2	chr11	106888323	106890203	NM_001256424	-	1	32528	2.99271	2.24473	0.750067
MAP3K14-AS1	chr17	43339124	43339832	NR_024435	+	1	32944	1.69324	2.09753	1.23877
CHSY3	chr5	129239553	129241612	NM_175856	+	1	33210	0.0393777	0.294391	7.47607
FSCN1	chr7	5632335	5634555	NM_003088	+	1	34209	3.81964	2.35513	0.616583
NCAM2	chr21	22369423	22370582	NM_004540	+	1	34776	0.236266	0.0735977	0.311503
RIPPLY2	chr6	84562820	84563758	NM_001009994	+	1	35145	0	0	#DIV/0!
HS3ST4	chr16	25702955	25704631	NM_006040	+	1	35229	0	0	#DIV/0!
STOX2	chr4	184826253	184828177	NM_020225	+	1	35824	0.393777	0.919971	2.33627
KCTD1	chr18	24235589	24237261	NM_001258222	-	1	36672	3.1896	4.30546	1.34985
COL5A1	chr9	137533359	137534397	NM_000093	+	1	40889	9.09625	11.1868	1.22983
MGARP	chr4	140201064	140201449	NM_032623	-	1	40920	0.0393777	0	0
SLC43A3	chr11	57194340	57194650	NM_199329	-	1	166	8.50559	3.67988	0.432643
FAM155B	chrX	68723731	68726051	NM_015686	+	1	201	0.315022	0	0
FBXO27	chr19	39522264	39523227	NM_178820	-	1	1320	0.433155	0.110397	0.254866
FGF3	chr11	69632033	69634710	NM_005247	-	1	1586	0	0	#DIV/0!
ZNF93	chr19	20011910	20012238	NM_031218	+	1	1706	5.39475	1.50875	0.279671
NOX4	chr11	89224416	89224718	NM_016931	-	1	1949	0	0.110397	#DIV/0!
PIP4K2A	chr10	23002155	23003790	NM_005028	-	1	2003	19.2951	14.3147	0.741886
LHX8	chr1	75600674	75601415	NM_001256114	+	1	2007	0	0	#DIV/0!
ZFP28	chr19	57049675	57050646	NM_020828	+	1	2247	1.57511	0.735977	0.467255
JAM3	chr11	133938850	133939681	NM_001205329	+	1	2795	6.1823	5.55662	0.898795
FERD3L	chr7	19184221	19184686	NM_152898	-	1	3098	0	0	#DIV/0!
PSD	chr10	104178528	104179548	NM_001270965	-	1	3278	0.196889	0.0735977	0.373804
ITPRIPL1	chr2	96990857	96991283	NM_001163523	+	1	3687	0.393777	0.294391	0.747607
NPY2R	chr4	156129168	156130209	NM_000910	+	1	4675	0.0787554	0	0
MEGF11	chr15	66544432	66546134	NM_032445	-	1	5213	0.826932	1.39836	1.69102
SHKBP1	chr19	41082615	41083355	NM_138392	+	1	5707	20.8702	13.9468	0.668262
PDE4B	chr1	66258440	66258918	NM_002600	+	1	6066	14.491	6.403	0.44186
ACSL6	chr5	131346892	131347776	NM_001205250	-	1	6212	0.669421	4.19507	6.26671
NRG2	chr5	139422076	139423150	NM_013981	-	1	6556	0	0.0735977	#DIV/0!
LMX1A	chr1	165324191	165326328	NM_001174069	-	1	6657	0.787554	0.220793	0.280353
ZNF14	chr19	19843482	19843943	NM_021030	-	1	7205	2.79582	1.69275	0.605457
LHCGR	chr2	48982621	48982958	NM_000233	-	1	8310	0.0787554	0	0
B4GALNT1	chr12	58025661	58027056	NM_001276468	-	1	8505	0.118133	0.147195	1.24601
MAPK11	chr22	50708190	50710490	NM_002751	-	1	8600	0.393777	0.220793	0.560705
ULK4P3	chr15	30395774	30396578	NR_026859	+	1	8838	0.157511	0	0
ARHGAP36	chrX	130192131	130192735	NM_144967	+	1	10180	0.157511	0	0
NOVA1	chr14	27066313	27066578	NM_002515	-	1	10245	3.07146	0.699178	0.227637
POU4F1	chr13	79175610	79177985	NM_006237	-	1	10317	0.157511	0	0
TBX5-AS1	chr12	114845861	114847650	NR_038440	+	1	11108	0	0	#DIV/0!
WTIP	chr19	34972054	34973645	NM_001080436	+	1	11110	0.118133	0.220793	1.86902
CORO2B	chr15	68870633	68871974	NM_006091	+	1	11358	0.551288	0.220793	0.400504
FGF13-AS1	chrX	137793095	137794010	NR_038405	+	1	11837	0.0787554	0.0367988	0.467255
ZNF418	chr19	58446336	58446800	NM_133460	-	1	11845	0.748177	0.220793	0.295108
MIR4321	chr19	2250560	2253959	NR_036207	+	1	12355	0	0	#DIV/0!
ELOVL5	chr6	53212617	53214043	NM_001242830	-	1	12558	8.58434	3.79028	0.441534
SORCS3	chr10	106399567	106402812	NM_014978	+	1	13135	0.0393777	0	0
RAB3C	chr5	57878725	57879177	NM_138453	+	1	13440	0.196889	0.0735977	0.373804
COLGALT2	chr1	184005359	184006766	NM_015101	-	1	14159	0.708799	0.33119	0.467255
GOLGA8B	chr15	34874861	34876425	NR_027410	-	1	14276	19.3738	31.1686	1.6088
FGF13	chrX	137793095	137794010	NM_004114	-	1	14451	1.772	1.28796	0.72684
KIRREL2	chr19	36347044	36348101	NM_199179	+	1	15042	0.0787554	0	0
AJAP1	chr1	4713989	4716555	NM_001042478	+	1	15182	0	0.0367988	#DIV/0!
PPP1R42	chr8	67940691	67940997	NM_001013626	-	1	15402	0	0	#DIV/0!
SLC1A2	chr11	35440375	35441882	NM_001195728	-	1	15622	2.24453	0.183994	0.0819745
SYN2	chr3	12045652	12046627	NM_133625	+	1	15836	0.118133	0.0735977	0.623006
ANK1	chr8	41753340	41755250	NM_001142446	-	1	16466	0.590666	0.257592	0.436104
KCNA2	chr1	111148983	111150186	NM_004974	-	1	16662	0.51191	0.0735977	0.143771
ZNF8	chr19	58789914	58790972	NM_021089	+	1	16673	3.07146	2.90711	0.94649
TTYH2	chr17	72208474	72208902	NM_032646	+	1	17383	3.22897	1.87674	0.581219
ULBP1	chr6	150284682	150286515	NM_025218	+	1	17858	0	0.0735977	#DIV/0!
TLX1	chr10	102891010	102891794	NM_005521	+	1	19054	0	2.57592	#DIV/0!
EHD3	chr2	31456740	31457653	NM_014600	+	1	20316	3.50462	1.36156	0.388504
PDE4C	chr19	18335072	18337375	NM_001098818	-	1	20872	0.157511	0.257592	1.63539
ASIC2	chr17	31618345	31620465	NM_183377	-	1	20975	0.315022	0.183994	0.584068
DDIT4L	chr4	101111146	101111497	NM_145244	-	1	22799	0.0787554	0.0367988	0.467255
DUSP5	chr10	112257163	112258684	NM_004419	+	1	22855	9.76567	0.95677	0.0979727
MPP2	chr17	41984148	41985012	NM_005374	-	1	23238	0.275644	0.0367988	0.133501
MGC16275	chr17	72208474	72208902	NR_026914	-	1	23932	1.22071	2.06074	1.68815
ZNF345	chr19	37341731	37342000	NM_001242475	+	1	24377	0.748177	0.735977	0.983694
TLX1NB	chr10	102891010	102891794	NM_001085398	-	1	25882	0	0.735977	#DIV/0!
NPPB	chr1	11919115	11919555	NM_002521	-	1	25920	0	0	#DIV/0!
VASH1	chr14	77227569	77228691	NM_014909	+	1	26556	6.30044	4.71025	0.747607
SYCP2L	chr6	10887184	10887622	NM_001040274	+	1	27550	0.0393777	0.0735977	1.86902
LRP2	chr2	170218314	170219203	NM_004525	-	1	28112	0	0	#DIV/0!
BOC	chr3	112930437	112931506	NM_033254	+	1	28526	2.36266	1.80314	0.763182
CSMD1	chr8	4848968	4852635	NM_033225	-	1	29622	0.708799	1.47195	2.07669
FLJ30403	chr19	52097252	52098000	NR_034159	-	1	30559	0.472533	0.33119	0.700882
DRD2	chr11	113345068	113346328	NM_000795	-	1	30712	0.590666	0.0367988	0.0623006
C5orf49	chr5	7850957	7851413	NM_001089584	-	1	32737	0.196889	0	0
HLX	chr1	221051966	221053673	NM_021958	+	1	33252	0.86631	0.735977	0.849554
ZFP42	chr4	188916605	188916876	NM_174900	+	1	33524	0	0	#DIV/0!
INHBB	chr2	121101800	121104534	NM_002193	+	1	35733	0.157511	0.257592	1.63539
MAP9	chr4	156297601	156298094	NM_001039580	-	1	36720	1.02382	0.809574	0.790739
CYP26A1	chr10	94833272	94835256	NM_000783	+	1	37519	0.0787554	0	0
LOC100505715	chr19	44405817	44406053	NR_038334	-	1	37566	0.551288	0	0
VSTM2A	chr7	54609734	54610140	NM_182546	+	1	37808	1.65386	1.14076	0.689757
OTX2-AS1	chr14	57278709	57279116	NR_029385	+	1	39572	0	0	#DIV/0!
FBXL15	chr10	104178528	104179548	NM_024326	+	1	39680	10.6714	7.83815	0.734504
LEF1-AS1	chr4	109092578	109092839	NR_029373	+	1	39759	0.275644	3.53269	12.8161
NUDT11	chrX	51238706	51240104	NM_018159	-	1	40206	0.118133	0.110397	0.934509
PIANP	chr12	6809214	6809816	NM_001244015	-	1	225	0.275644	0.441586	1.60202
LOC344595	chr3	106959409	106959925	NR_028301	+	1	375	0.472533	0.515184	1.09026
SLFN13	chr17	33775294	33775794	NM_144682	-	1	515	7.36363	2.06074	0.279853
MME	chr3	154797398	154797988	NM_000902	+	1	624	4.37093	3.34869	0.766129
NUP210	chr3	13460970	13462146	NM_024923	-	1	668	21.8153	5.00464	0.22941
HMGCLL1	chr6	55443732	55444092	NM_019036	-	1	800	0.0787554	0.110397	1.40176
MAFA	chr8	144510850	144513957	NM_201589	-	1	833	0.0787554	0	0
SLC8A3	chr14	70655095	70656077	NM_033262	-	1	957	0.236266	0.147195	0.623006
EFCC1	chr3	128719865	128721245	NM_024768	+	1	996	0.630044	1.58235	2.51149
LOC285548	chr4	13548570	13549956	NR_015450	-	1	1070	0	0.0735977	#DIV/0!
HOXC9	chr12	54393374	54394648	NM_006897	+	1	1169	0	0	#DIV/0!
SLC30A10	chr1	220101132	220102147	NM_018713	-	1	1569	7.04861	0	0
PCDH11Y	chrY	4867956	4868586	NM_032971	+	1	1727	1.85075	0.147195	0.0795327
ATP8B2	chr1	154298205	154298544	NM_001005855	+	1	1886	0.945065	0.515184	0.54513
TMEM255A	chrX	119444859	119445272	NM_001104545	-	1	1889	1.26009	0.515184	0.408848
NKX1-2	chr10	126135809	126138896	NM_001146340	-	1	1992	0	0	#DIV/0!
FMNL1	chr17	43298725	43299640	NM_005892	+	1	2032	6.02479	2.53912	0.421445
PAX7	chr1	18956895	18959829	NM_013945	+	1	2376	0	0	#DIV/0!
TSHZ3	chr19	31839635	31843049	NM_020856	-	1	2643	2.44142	1.72955	0.708418
ISLR2	chr15	74419870	74423044	NM_020851	+	1	2702	0.0787554	0.147195	1.86902
T	chr6	166579973	166583423	NM_001270484	-	1	2985	0	0	#DIV/0!
LOC100506421	chr2	105468851	105473488	NR_037883	-	1	3102	0	0	#DIV/0!
VAV2	chr9	136856230	136858681	NM_001134398	-	1	3202	12.1283	1.87674	0.15474
NTM	chr11	131780328	131781532	NM_001144058	+	1	3348	0.433155	1.21436	2.80353
ENOX1	chr13	44359858	44361696	NM_001242863	-	1	3472	0.393777	0.699178	1.77557
LHX5	chr12	113908887	113910681	NM_022363	-	1	3674	0	0	#DIV/0!
CRHR2	chr7	30721372	30722445	NM_001202483	-	1	3737	0.0787554	0.0735977	0.934509
MAL	chr2	95690857	95692431	NM_002371	+	1	4015	0.708799	0.33119	0.467255
GAS1	chr9	89560584	89562647	NM_002048	-	1	4400	0.236266	0.183994	0.778758
SGK1	chr6	134638797	134639021	NM_001143676	-	1	4407	297.696	2.98071	0.0100126
DBC1	chr9	122131086	122132214	NM_014618	-	1	4886	0.354399	0	0
MGC2889	chr3	192958709	192959373	NR_026877	+	1	5773	0.0393777	0	0
CRHR1	chr17	43860684	43862928	NM_001145148	+	1	5801	0	0	#DIV/0!
PEX5L	chr3	179754520	179755245	NM_001256752	-	1	5981	0	0	#DIV/0!
NRXN2	chr11	64409877	64411253	NM_138734	-	1	6203	0.118133	0.0367988	0.311503
ZNF280B	chr22	22862623	22863220	NM_080764	-	1	6238	3.97715	2.75991	0.693942
CADM2	chr3	85008284	85008837	NM_001167674	+	1	6522	1.29946	1.61915	1.24601
TMTC1	chr12	29935995	29937433	NM_001193451	-	1	6544	3.58337	5.04144	1.4069
FAM196A	chr10	128993505	128995167	NM_001039762	-	1	6576	0.748177	2.39192	3.19701
BEND5	chr1	49242371	49242810	NM_024603	-	1	6735	0.51191	0.257592	0.503197
KCNK12	chr2	47796923	47799166	NM_022055	-	1	7014	0.433155	0	0
GNE	chr9	36258170	36258886	NM_005476	-	1	7100	117.306	68.2986	0.582225
SYNDIG1L	chr14	74892466	74893184	NM_001105579	-	1	7376	0	0	#DIV/0!
RGS20	chr8	54791845	54795141	NM_003702	+	1	7417	0.236266	0	0
CRTAC1	chr10	99789614	99791320	NM_018058	-	1	7437	0	0	#DIV/0!
DST	chr6	56818873	56820308	NM_001144769	-	1	7447	324	246.699	0.761418
LOC100499484-C9ORF174	chr9	100000463	100000820	NR_036529	+	1	7499	0.905688	2.09753	2.31596
EVC2	chr4	5709985	5710495	NM_001166136	-	1	7691	0.433155	0.404787	0.934509
RNF175	chr4	154680774	154681377	NM_173662	-	1	7823	0	0.0735977	#DIV/0!
TM6SF1	chr15	83775861	83776922	NM_023003	+	1	7843	0.708799	0.772776	1.09026
ZNF141	chr4	330162	332068	NM_003441	+	1	7862	2.20515	2.42872	1.10139
GFRA2	chr8	21644908	21647845	NM_001165038	-	1	8078	0.945065	0.62558	0.661944
TMEM130	chr7	98467023	98468058	NM_001134451	-	1	8202	0	0	#DIV/0!
BRSK2	chr11	1410119	1412346	NM_003957	+	1	8264	0	0.294391	#DIV/0!
NKAIN4	chr20	61884644	61886387	NM_152864	-	1	8383	0	0	#DIV/0!
LOC100506834	chr9	89560584	89562647	NR_049794	+	1	8662	0	0	#DIV/0!
PTH1R	chr3	46923265	46925182	NM_001184744	+	1	8681	0.0787554	0	0
EPHA5	chr4	66536065	66536674	NM_182472	-	1	8769	0	0	#DIV/0!
SYT5	chr19	55690182	55691623	NM_003180	-	1	8933	0.157511	0	0
WIPF1	chr2	175546862	175547880	NM_001077269	-	1	9015	27.1312	11.4444	0.421818
IGF2BP1	chr17	47072820	47076042	NM_006546	+	1	9172	0.0787554	0.220793	2.80353
CDH23	chr10	73156164	73157954	NM_001171932	+	1	9422	0.393777	0.147195	0.373804
AMPH	chr7	38670439	38671008	NM_139316	-	1	10229	0.748177	0.183994	0.245923
MLF1	chr3	158288800	158289271	NM_001195433	+	1	10300	0.748177	0.183994	0.245923
OLIG2	chr21	34395128	34400245	NM_005806	+	1	10321	0	0	#DIV/0!
TMEM108	chr3	132756985	132757895	NM_001136469	+	1	10350	0	0.220793	#DIV/0!
GSG1L	chr16	28073817	28075296	NM_001109763	-	1	10353	0	0	#DIV/0!
RET	chr10	43571939	43573434	NM_020975	+	1	10483	1.10258	0.735977	0.667507
WNT2	chr7	116962841	116964803	NR_024047	-	1	10552	0	0.220793	#DIV/0!
RUNDC3A	chr17	42385810	42386393	NM_006695	+	1	10716	0	0	#DIV/0!
ONECUT1	chr15	53080458	53083699	NM_004498	-	1	10946	0.0787554	0	0
C17orf102	chr17	32905965	32908951	NM_207454	-	1	10960	0	0	#DIV/0!
LOXL2	chr8	23260442	23261867	NM_002318	-	1	11027	3.66213	3.0543	0.834024
SFMBT2	chr10	7449376	7455339	NM_001029880	-	1	11282	7.04861	5.18864	0.736122
KIF1A	chr2	241758141	241760783	NM_001244008	-	1	11561	1.37822	0.147195	0.106801
MAP6	chr11	75378416	75379882	NM_033063	-	1	11643	0.236266	0.147195	0.623006
MCTP1	chr5	94619459	94621121	NM_024717	-	1	11783	4.17404	3.0911	0.740554
PLCB1	chr20	8112884	8113592	NM_015192	+	1	11883	3.38648	8.35334	2.46667
KCNB2	chr8	73448659	73449725	NM_004770	+	1	11905	0.157511	0	0
ATRNL1	chr10	116852261	116854094	NM_207303	+	1	11922	0.354399	0.220793	0.623006
BATF3	chr1	212872460	212874048	NM_018664	-	1	12153	0.275644	0.0735977	0.267003
LOC283731	chr15	74419870	74423044	NR_027073	-	1	12213	0.0393777	0.147195	3.73804
PLEKHH2	chr2	43864322	43864956	NM_172069	+	1	12340	2.79582	2.31833	0.829212
LMX1B	chr9	129372737	129378106	NM_001174146	+	1	12563	0.0393777	0.0735977	1.86902
ZDHHC15	chrX	74742765	74743117	NM_144969	-	1	12589	0.118133	0.919971	7.78758
CACNA1H	chr16	1202414	1204624	NM_021098	+	1	12972	3.03208	1.76634	0.582551
GPX7	chr1	53067880	53068608	NM_015696	+	1	13513	1.22071	0.441586	0.361745
SNAP25	chr20	10198135	10198984	NM_003081	+	1	13708	0.748177	0	0
TCTEX1D1	chr1	67218079	67218293	NM_152665	+	1	13988	0.0787554	0.0367988	0.467255
KCNS3	chr2	18059038	18059245	NM_002252	+	1	14020	2.99271	8.27974	2.76664
MIR2682	chr1	98510966	98511710	NR_039604	-	1	14757	0	0	#DIV/0!
CHCHD5	chr2	113341684	113342453	NM_032309	+	1	15332	6.45795	3.86388	0.598314
ZNF569	chr19	37957726	37958390	NM_152484	-	1	15705	1.0632	0.551983	0.519172
GRP	chr18	56887091	56887665	NM_001012512	+	1	15811	0	0	#DIV/0!
MATK	chr19	3785511	3786653	NM_139354	-	1	15890	0.984443	0.257592	0.261663
FGF12	chr3	192125821	192127994	NM_021032	-	1	15987	0	0.0367988	#DIV/0!
WDR86-AS1	chr7	151106244	151107808	NR_034012	+	1	16039	0	0.0735977	#DIV/0!
RIMS1	chr6	72596036	72596404	NM_014989	+	1	16514	0.118133	0.0367988	0.311503
CHRFAM7A	chr15	30685087	30685891	NM_148911	-	1	17376	4.68595	6.07181	1.29575
CHST9	chr18	24764951	24765507	NM_001256316	-	1	17711	0	0	#DIV/0!
IGFBP5	chr2	217559039	217559484	NM_000599	-	1	17761	20.5945	14.9035	0.723664
NLGN1	chr3	173115404	173115775	NM_014932	+	1	17873	0.433155	0.441586	1.01946
MDFIC	chr7	114562170	114563193	NM_001166345	+	1	18297	9.92319	4.30546	0.433879
CNTNAP2	chr7	145813030	145814084	NM_014141	+	1	18326	14.6879	8.97892	0.611314
CHST1	chr11	45686160	45687495	NM_003654	-	1	18628	0.51191	0.110397	0.215656
CPXM2	chr10	125650820	125651373	NM_198148	-	1	18782	0.551288	0.441586	0.801008
LIN28A	chr1	26737246	26738148	NM_024674	+	1	19072	0	0	#DIV/0!
RBM20	chr10	112402953	112404328	NM_001134363	+	1	19458	0.630044	0.147195	0.233627
KIAA2022	chrX	74143852	74145176	NM_001008537	-	1	19739	2.08702	0.33119	0.15869
EYA2	chr20	45523250	45524020	NM_005244	+	1	20216	5.63101	0.183994	0.0326751
NUDT10	chrX	51075272	51076331	NM_153183	+	1	21290	0.275644	0.367988	1.33501
LOC100499484	chr9	100000463	100000820	NR_036526	+	1	21303	1.33884	2.28153	1.7041
POU3F3	chr2	105468851	105473488	NM_006236	+	1	21474	0	0	#DIV/0!
ZNF256	chr19	58458686	58459219	NM_005773	-	1	21979	2.95333	0.147195	0.0498405
EMILIN3	chr20	39994545	39995810	NM_052846	-	1	22340	4.60719	3.64309	0.790739
HS3ST2	chr16	22824616	22826459	NM_006043	+	1	22364	0.275644	0.220793	0.801008
SRRM4	chr12	119418591	119418834	NM_194286	+	1	22586	0	0	#DIV/0!
KCNT2	chr1	196577708	196578011	NM_198503	-	1	22651	0.157511	0.367988	2.33627
CDH11	chr16	65154656	65157664	NM_001797	-	1	22659	7.91492	8.42693	1.06469
HCN4	chr15	73659860	73662015	NM_005477	-	1	23033	0.236266	0.0735977	0.311503
PDE4DIP	chr1	145075483	145075845	NM_022359	-	1	23256	39.5746	39.7795	1.00518
HIC2	chr22	21770896	21772442	NM_015094	+	1	24096	9.76567	7.80135	0.798855
COL4A1	chr13	110958891	110960590	NM_001845	-	1	24332	16.893	16.6331	0.984611
WSCD2	chr12	108522950	108523852	NM_014653	+	1	24454	0	0.147195	#DIV/0!
TMEM233	chr12	120031494	120033212	NM_001136534	+	1	24607	0.157511	0	0
KIRREL3-AS3	chr11	126873091	126873809	NR_040078	+	1	24747	0	0	#DIV/0!
FADS2	chr11	61594996	61596710	NM_004265	+	1	25390	2.44142	0.404787	0.1658
CHAT	chr10	50817095	50817309	NM_020984	+	1	25531	0.157511	0	0
HSD17B14	chr19	49340488	49340774	NM_016246	-	1	25598	0	0.220793	#DIV/0!
ADCY4	chr14	24803678	24804353	NM_001198592	-	1	25926	2.24453	2.61272	1.16404
EBF4	chr20	2672904	2674698	NM_001110514	+	1	26154	0.236266	0.551983	2.33627
FEZF2	chr3	62357639	62359774	NM_018008	-	1	26691	0	0	#DIV/0!
MCF2L2	chr3	183145427	183146790	NM_015078	-	1	26804	1.29946	0.441586	0.339822
PCDHGC4	chr5	140864527	140864748	NM_032406	+	1	27695	0.157511	0.147195	0.934509
SLIT1	chr10	98945062	98946239	NM_003061	-	1	27984	0.157511	0.0735977	0.467255
ZNF365	chr10	64133789	64134420	NM_199451	+	1	28158	0.0393777	0	0
MAST4	chr5	65891877	65893539	NM_198828	+	1	28370	12.7978	42.4291	3.31535
SLC9A3	chr5	523676	524887	NM_004174	-	1	28790	1.10258	0.183994	0.166877
EGR4	chr2	73518364	73520986	NM_001965	-	1	28807	0	0	#DIV/0!
MSX2P1	chr17	56234321	56234827	NR_002307	+	1	29729	0	0	#DIV/0!
MEDAG	chr13	31480272	31481105	NM_032849	+	1	30110	0.905688	0.220793	0.243785
ADAMTS3	chr4	73433783	73434289	NM_014243	-	1	30120	0.433155	0.33119	0.764598
ZNF519	chr18	14132000	14132482	NR_033354	-	1	30409	0.196889	0.0735977	0.373804
NKX2-3	chr10	101292436	101292851	NM_145285	+	1	31009	1.33884	2.53912	1.8965
RFX4	chr12	106975195	106975714	NM_213594	+	1	31391	0	0.0367988	#DIV/0!
KCNH1	chr1	211306667	211307675	NM_002238	-	1	31519	0.590666	0.662379	1.12141
CCDC67	chr11	93063598	93064076	NM_181645	+	1	31592	0.118133	0.257592	2.18052
KCNH5	chr14	63512022	63512996	NM_172375	-	1	31630	0	0	#DIV/0!
C20orf112	chr20	31170740	31173640	NM_001256798	-	1	31668	164.835	113.377	0.687822
ATCAY	chr19	3880718	3881278	NM_033064	+	1	32024	0	0.183994	#DIV/0!
C20orf194	chr20	3387965	3388901	NM_001009984	-	1	32272	2.79582	2.24473	0.802888
MIR137	chr1	98510966	98511710	NR_029679	-	1	32575	0	0	#DIV/0!
GRID1	chr10	88122924	88127364	NM_017551	-	1	33080	0.275644	0.294391	1.06801
FLJ16779	chr20	61884644	61886387	NR_024389	+	1	33305	0	0	#DIV/0!
BEND6	chr6	56818873	56820308	NM_152731	+	1	33469	0.472533	0.183994	0.389379
LOC100302640	chr3	106959409	106959925	NR_028303	-	1	33613	0	0	#DIV/0!
ZNF385B	chr2	180725717	180726465	NM_152520	-	1	33854	0	0.0735977	#DIV/0!
TRPC3	chr4	122871412	122873182	NM_001130698	-	1	34062	0.0787554	0	0
IGLON5	chr19	51815157	51815458	NM_001101372	+	1	34251	0.0393777	0	0
WDR86	chr7	151106244	151107808	NM_198285	-	1	34304	0.118133	0	0
FAM132A	chr1	1181756	1182470	NM_001014980	-	1	34346	3.1896	1.32476	0.415337
TRIM67	chr1	231297812	231299777	NM_001004342	+	1	34404	0	0.699178	#DIV/0!
NGB	chr14	77736733	77737772	NM_021257	-	1	35052	0	0	#DIV/0!
KIAA1217	chr10	23983366	23984978	NM_001098500	+	1	35360	71.0374	101.896	1.4344
ZNF665	chr19	53696029	53696650	NM_024733	-	1	35596	0.393777	0.441586	1.12141
COL4A2	chr13	110958891	110960590	NM_001846	+	1	35667	20.9883	22.5945	1.07653
ALOX15	chr17	4542715	4544934	NM_001140	-	1	35821	0.315022	0.294391	0.934509
LOC100144602	chr4	66536065	66536674	NR_034138	+	1	36065	0	0	#DIV/0!
NID2	chr14	52534581	52536722	NM_007361	-	1	36443	11.3802	16.0811	1.41308
CDH6	chr5	31193952	31194419	NM_004932	+	1	37028	0.590666	1.28796	2.18052
ZNF75A	chr16	3355020	3356012	NM_153028	+	1	37277	4.29217	2.68632	0.625864
G0S2	chr1	209848443	209849428	NM_015714	+	1	37459	2.95333	0.147195	0.0498405
TBX21	chr17	45810589	45811388	NM_013351	+	1	37534	0.196889	0.257592	1.30831
TMEM132E	chr17	32905965	32908951	NM_207313	+	1	37591	0	0	#DIV/0!
NKX2-2	chr20	21485932	21496714	NM_002509	-	1	37936	0.315022	0.367988	1.16814
MAPK8IP1	chr11	45907006	45907809	NM_005456	+	1	37950	0.590666	0.257592	0.436104
FOXP2	chr7	113724924	113727795	NR_033766	+	1	38183	12.8371	2.35513	0.183462
EOMES	chr3	27762351	27763995	NM_005442	-	1	38698	1.0632	0.147195	0.138446
MDGA1	chr6	37663761	37667102	NM_153487	-	1	39110	0.275644	0.367988	1.33501
NOG	chr17	54670780	54672347	NM_005450	+	1	39624	0	0	#DIV/0!
HEY2	chr6	126068722	126071320	NM_012259	+	1	39813	0.393777	0	0
MIR1258	chr2	180725717	180726465	NR_031659	-	1	39870	0	0	#DIV/0!
ZNF461	chr19	37157632	37158119	NM_153257	-	1	40115	1.22071	0.588781	0.482327
LINC00461	chr5	87968635	87968907	NR_024384	-	1	40218	0	0.0735977	#DIV/0!
DLX3	chr17	48070698	48072654	NM_005220	-	1	40336	0	0.147195	#DIV/0!
CAMK4	chr5	110559569	110560446	NM_001744	+	1	40524	1.69324	1.28796	0.760647
RAB38	chr11	87908243	87908614	NM_022337	-	1	40756	0.315022	0.294391	0.934509
TIGD7	chr16	3355020	3356012	NM_033208	-	1	40956	1.92951	2.94391	1.52573
MIR124-3	chr20	61806254	61810867	NR_029670	+	1	41025	0	0	#DIV/0!
HRASLS	chr3	192958709	192959373	NM_020386	+	1	41054	0	0	#DIV/0!
SCGN	chr6	25652380	25652709	NM_006998	+	1	2427	2.36266	0.0735977	0.0311503
MEPCE	chr7	100025804	100028002	NM_001194991	+	1	2563	9.7263	9.3837	0.964777
COL23A1	chr5	178016558	178017670	NM_173465	-	1	2824	0.0393777	0.183994	4.67255
ERBB4	chr2	213402180	213403867	NM_005235	-	1	4816	0	0	#DIV/0!
ANKRD45	chr1	173638662	173639045	NM_198493	-	1	5628	0	0	#DIV/0!
RNF144A-AS1	chr2	7057530	7058433	NR_033997	-	1	5874	0.157511	0.294391	1.86902
STK33	chr11	8615397	8615889	NM_030906	-	1	6283	0.236266	0.0367988	0.155752
ZCWPW1	chr7	100025804	100028002	NM_017984	-	1	6687	0.472533	0.993569	2.10265
FLT3	chr13	28674227	28675170	NM_004119	-	1	6925	0.393777	0.147195	0.373804
MSRB3	chr12	65672391	65673250	NM_198080	+	1	7256	6.33981	4.78385	0.754573
CALCR	chr7	93204085	93204381	NM_001742	-	1	9025	0.236266	0.110397	0.467255
KCNQ2	chr20	62102541	62103995	NM_004518	-	1	9592	0	0	#DIV/0!
LINGO2	chr9	29212171	29212819	NM_001258282	-	1	11818	0.0787554	0	0
BSX	chr11	122852411	122852699	NM_001098169	-	1	12155	0	0	#DIV/0!
RNF144A	chr2	7057530	7058433	NM_014746	+	1	17608	9.45065	8.09574	0.856633
LRAT	chr4	155663809	155664315	NM_004744	+	1	18586	0.157511	0.110397	0.700882
NAT16	chr7	100823307	100823701	NM_198571	-	1	24674	0	0.0367988	#DIV/0!
COL6A5	chr3	130064574	130064840	NR_022012	+	1	28562	0.0787554	0.110397	1.40176
IGSF21	chr1	18434105	18434813	NM_032880	+	1	30324	0.236266	0.0735977	0.311503
SYT10	chr12	33591763	33593050	NM_198992	-	1	30927	0.0393777	0.62558	15.8867
KCNK3	chr2	26915603	26916551	NM_002246	+	1	32474	0.669421	0.147195	0.219885
SFRP5	chr10	99531025	99531968	NM_003015	-	1	32836	0	0.0367988	#DIV/0!
RCSD1	chr1	167599464	167599839	NM_052862	+	1	33740	11.3408	5.15184	0.454275
PLD5	chr1	242686916	242687476	NM_152666	-	1	34631	0	0	#DIV/0!
SDHAP3	chr5	1594238	1595027	NR_003263	-	1	35810	6.22168	5.51983	0.887192
RGS7BP	chr5	63801781	63802605	NM_001029875	+	1	38312	0.236266	0.772776	3.27078
PI4KAP2	chr22	21871023	21872569	NR_003700	-	1	38472	12.6796	9.01572	0.71104
SHISA2	chr13	26624725	26626265	NM_001007538	-	1	39658	0.236266	0.441586	1.86902
FBN2	chr5	127872563	127874945	NM_001999	-	1	40300	1.02382	1.06717	1.04234
SEMA7A	chr15	74725323	74726487	NM_001146030	-	1	12145	3.78026	0.95677	0.253096
CHST7	chrX	46433054	46434902	NM_019886	+	1	60	0.669421	0.147195	0.219885
DNAI2	chr17	72270301	72270512	NM_023036	+	1	384	0	0	#DIV/0!
GPRASP1	chrX	101906001	101907017	NM_001099411	+	1	500	3.26835	3.38549	1.03584
TRABD2B	chr1	48462131	48462976	NM_001194986	-	1	576	0.472533	0.515184	1.09026
BANK1	chr4	102711829	102712199	NM_017935	+	1	583	13.349	0.735977	0.0551333
HOXC11	chr12	54366815	54369103	NM_014212	+	1	586	0	0	#DIV/0!
UCHL1	chr4	41258759	41259867	NM_004181	+	1	659	0.708799	0.367988	0.519172
IL17RD	chr3	57198243	57199378	NM_017563	-	1	756	0.984443	10.8189	10.9898
DKK3	chr11	12029737	12030841	NM_001018057	-	1	845	7.32426	9.16291	1.25104
FUT9	chr6	96463869	96464136	NM_006581	+	1	852	0	0	#DIV/0!
FBLIM1	chr1	16085147	16085862	NM_017556	+	1	949	85.9222	49.9728	0.581606
SV2B	chr15	91642908	91643702	NM_014848	+	1	1027	0.826932	0.183994	0.222502
C9orf170	chr9	89763336	89763767	NM_001001709	+	1	1197	0.0787554	0	0
MOS	chr8	57025546	57026543	NM_005372	-	1	1291	0	0	#DIV/0!
PHYHIP	chr8	22089367	22089668	NM_014759	-	1	1371	0.196889	0.147195	0.747607
RFX8	chr2	102090370	102091130	NM_001145664	-	1	1411	0	0	#DIV/0!
FGFR1	chr8	38325091	38326374	NM_001174065	-	1	1429	10.3563	5.74062	0.55431
POU3F2	chr6	99279317	99283842	NM_005604	+	1	2360	0	0.0367988	#DIV/0!
DUSP26	chr8	33456915	33457515	NM_024025	-	1	2630	0.157511	0	0
HOXA1	chr7	27135342	27136736	NM_153620	-	1	2784	1.49635	0.220793	0.147554
GALNT16	chr14	69726250	69728393	NM_020692	+	1	2803	0.433155	0.441586	1.01946
RASSF5	chr1	206680236	206681444	NM_182663	+	1	3316	16.893	6.14541	0.363783
VSTM2B	chr19	30015781	30021367	NM_001146339	+	1	3692	0	0	#DIV/0!
FIGNL1	chr7	50517627	50518668	NM_001042762	-	1	3824	8.62372	7.72776	0.896105
SLC15A3	chr11	60718428	60718888	NM_016582	-	1	3846	5.19786	2.83351	0.54513
SIX6	chr14	60975732	60978180	NM_007374	+	1	3871	0	0	#DIV/0!
EMX2OS	chr10	119301321	119305368	NR_002791	-	1	3990	0	0	#DIV/0!
ZNF132	chr19	58951214	58952250	NM_003433	-	1	4127	2.00826	0.846373	0.421445
CLDN10	chr13	96204691	96205496	NM_006984	+	1	4158	0.157511	0.0735977	0.467255
LOC283683	chr15	23115057	23115471	NR_040057	-	1	4323	0	0	#DIV/0!
DISP2	chr15	40650055	40651102	NM_033510	+	1	4986	9.7263	2.09753	0.215656
FHL3	chr1	38470617	38471396	NM_001243878	-	1	5387	2.4808	1.80314	0.72684
STMN2	chr8	80523975	80525765	NM_007029	+	1	5969	5.1191	4.85745	0.948886
CHGB	chr20	5891878	5892417	NM_001819	+	1	5979	7.91492	0.62558	0.0790381
SORCS1	chr10	108923780	108924805	NM_001206572	-	1	6256	1.33884	0.294391	0.219885
CR2	chr1	207627531	207628280	NM_001006658	+	1	6294	29.9664	0.551983	0.01842
FAM20A	chr17	66596072	66597578	NM_001243746	-	1	6346	2.4808	1.32476	0.534005
SLITRK2	chrX	144899363	144900266	NM_032539	+	1	6629	0.157511	0	0
BEX1	chrX	102318601	102319304	NM_018476	-	1	6685	0.551288	0.0367988	0.0667507
VAX2	chr2	71126720	71129209	NM_012476	+	1	6782	0	0	#DIV/0!
SLC22A17	chr14	23821087	23822106	NM_020372	-	1	8046	0.630044	0.367988	0.584068
UNC80	chr2	210636344	210636935	NM_182587	+	1	8417	0.118133	0.0735977	0.623006
KHDC1	chr6	74019428	74020053	NM_001251874	-	1	8725	0.51191	0.478385	0.934509
RUNX2	chr6	45389420	45391646	NM_004348	+	1	8749	9.49003	10.7453	1.13227
EMX2	chr10	119301321	119305368	NM_001165924	+	1	8805	0	0	#DIV/0!
KIF26B	chr1	245316547	245320247	NM_018012	+	1	8979	0.157511	0.588781	3.73804
GFPT2	chr5	179779114	179781279	NM_005110	-	1	9027	0.86631	0.367988	0.424777
KCNC2	chr12	75602991	75603344	NM_139136	-	1	9120	0	0.147195	#DIV/0!
PTCHD4	chr6	48036137	48036410	NM_207499	-	1	9549	0	0	#DIV/0!
GPC3	chrX	133118960	133119990	NM_001164619	-	1	9608	0.354399	0.478385	1.34985
CMTM3	chr16	66638254	66639561	NR_037613	+	1	9637	2.91395	2.28153	0.782967
MORC2-AS1	chr22	31318228	31318489	NR_026920	+	1	9916	3.50462	6.219	1.77452
NEUROG2	chr4	113435898	113438002	NM_024019	-	1	10119	0	0	#DIV/0!
HOTAIRM1	chr7	27135342	27136736	NR_038366	+	1	10149	1.89013	0.220793	0.116814
COL15A1	chr9	101705907	101706682	NM_001855	+	1	10319	9.3719	6.403	0.683213
LOC100130992	chr10	22540707	22542739	NR_038921	+	1	10603	0.708799	0.220793	0.311503
GAD2	chr10	26504383	26507434	NM_000818	+	1	10844	0	0	#DIV/0!
TMEM47	chrX	34674507	34675727	NM_031442	-	1	12033	8.07243	6.69739	0.829662
ZNF599	chr19	35263648	35264275	NM_001007248	-	1	12234	0.472533	0.441586	0.934509
RAB31	chr18	9707752	9709311	NM_006868	+	1	12260	13.1522	6.18221	0.470053
SP8	chr7	20823307	20825662	NM_198956	-	1	12479	0	0.183994	#DIV/0!
TOP3A	chr17	18217821	18219056	NM_004618	-	1	12511	8.19057	8.05895	0.98393
ATP6V0C	chr16	2563430	2564903	NM_001694	+	1	13243	124.946	57.5902	0.460922
CRMP1	chr4	5894071	5895116	NM_001014809	-	1	13631	0.826932	0.551983	0.667507
GABRB2	chr5	160974692	160975384	NM_021911	-	1	14965	4.44968	0.441586	0.0992399
MARCH4	chr2	217236025	217237129	NM_020814	-	1	15122	0.86631	0	0
PCP4L1	chr1	161228477	161229028	NM_001102566	+	1	15741	0.196889	0.33119	1.68212
SRRT	chr7	100472375	100473393	NM_015908	+	1	15748	18.665	18.6202	0.997598
KCNJ3	chr2	155554005	155556069	NM_001260509	+	1	15794	0.157511	1.14076	7.24245
SYNM	chr15	99645030	99646444	NM_145728	+	1	15882	14.9242	7.17577	0.480816
KCNH3	chr12	49931623	49933637	NM_012284	+	1	16005	0.275644	0.220793	0.801008
BACH2	chr6	91004795	91006944	NM_001170794	-	1	16303	10.632	1.58235	0.148829
LOC646999	chr7	39649253	39649510	NR_024390	+	1	16319	0.0787554	0	0
FADS6	chr17	72889349	72890060	NM_178128	-	1	16482	0.196889	0	0
KIAA1755	chr20	36888891	36889442	NM_001029864	-	1	16691	0.51191	1.21436	2.37222
RGS17	chr6	153450992	153452792	NM_012419	-	1	17020	0.393777	0.183994	0.467255
CACNA2D1	chr7	82072021	82073520	NM_000722	-	1	17063	1.45698	0.404787	0.277827
CA3	chr8	86350765	86351196	NM_005181	+	1	17109	0.433155	0.294391	0.679643
VGF	chr7	100806279	100809064	NM_003378	-	1	17301	0.118133	0.0367988	0.311503
PTH2R	chr2	209271337	209271987	NM_005048	+	1	17832	0.118133	0.0735977	0.623006
LOC100287314	chr12	30948548	30949757	NR_040245	+	1	18328	0	0.0367988	#DIV/0!
FRRS1L	chr9	111929197	111929587	NM_014334	-	1	18337	0	0	#DIV/0!
DLC1	chr8	12990090	12990914	NM_006094	-	1	18647	6.02479	6.51339	1.0811
HBQ1	chr16	230301	231761	NM_005331	+	1	18990	0	0	#DIV/0!
SPAG17	chr1	118727816	118728097	NM_206996	-	1	19244	0	0.257592	#DIV/0!
FAM26F	chr6	116783067	116783678	NM_001010919	+	1	19893	1.26009	0.294391	0.233627
ZNF208	chr19	22193330	22193583	NM_007153	-	1	20898	0.748177	0.110397	0.147554
ACSS3	chr12	81471569	81472119	NM_024560	+	1	21119	0.708799	0.441586	0.623006
ZBTB16	chr11	113929633	113932190	NM_006006	+	1	21349	0.826932	0.33119	0.400504
KIAA1751	chr1	1935166	1935452	NM_001080484	-	1	21455	0	0	#DIV/0!
PPP4R4	chr14	94640366	94641648	NM_020958	+	1	21516	0	0	#DIV/0!
EID1	chr15	49170144	49170710	NM_014335	+	1	21646	63.91	33.5605	0.525122
ZNF853	chr7	6654745	6655860	NM_017560	+	1	22113	0.826932	0.33119	0.400504
CNGA3	chr2	98962873	98964187	NM_001298	+	1	23084	0.590666	0.183994	0.311503
FAM181B	chr11	82443435	82444976	NM_175885	-	1	23168	0	0.0735977	#DIV/0!
INSM1	chr20	20344400	20350605	NM_002196	+	1	23171	2.08702	0.220793	0.105793
C4orf48	chr4	2042115	2044581	NM_001168243	+	1	23229	1.02382	2.90711	2.83947
FGF20	chr8	16859044	16859452	NM_019851	-	1	23409	0	0	#DIV/0!
TRIM72	chr16	31225956	31228264	NM_001008274	+	1	23519	0	0	#DIV/0!
NRIP3	chr11	9025095	9026315	NM_020645	-	1	23954	0.157511	0.183994	1.16814
CACNA1A	chr19	13616752	13617267	NM_001174080	-	1	24013	1.0632	0	0
SEZ6	chr17	27332268	27333188	NM_001098635	-	1	24153	0.354399	0.367988	1.03834
SMCR8	chr17	18217821	18219056	NM_144775	+	1	24256	54.2231	49.4576	0.912114
FRMPD4	chrX	12156604	12157274	NM_014728	+	1	24531	0	0	#DIV/0!
KCNJ12	chr17	21279506	21281574	NM_021012	+	1	24554	1.22071	0.515184	0.422036
STK3	chr8	99952020	99954686	NM_001256312	-	1	25030	5.78852	7.06538	1.22058
BNC1	chr15	83951980	83953930	NM_001717	-	1	25139	0	0	#DIV/0!
ULK4P1	chr15	32726421	32727225	NR_026858	-	1	25245	0.236266	0	0
DPY19L2P2	chr7	102920309	102921514	NR_003561	-	1	25425	0.196889	1.58235	8.03678
STC2	chr5	172754056	172757098	NM_003714	-	1	25460	1.0632	0.662379	0.623006
PPAPDC1A	chr10	122216259	122217377	NM_001030059	+	1	25465	0	0	#DIV/0!
PYDC1	chr16	31225956	31228264	NM_152901	-	1	25711	0	0	#DIV/0!
EXOC3L2	chr19	45737482	45738145	NM_138568	-	1	25741	0.157511	0.62558	3.97166
GNB4	chr3	179168735	179169593	NM_021629	-	1	25907	6.5367	5.59342	0.855695
FAM19A2	chr12	62584768	62586268	NM_178539	-	1	26013	0.354399	0.367988	1.03834
C1orf95	chr1	226736354	226737412	NM_001003665	+	1	26207	1.4176	0	0
NEFL	chr8	24812946	24814299	NM_006158	-	1	26582	0.196889	0.0367988	0.186902
TEKT2	chr1	36549554	36549965	NM_014466	+	1	26803	0	0	#DIV/0!
MIR3150B	chr8	96085269	96085747	NR_037484	-	1	26822	0	0	#DIV/0!
HS3ST1	chr4	11429414	11429633	NM_005114	-	1	27270	10.0807	8.39014	0.832297
CDO1	chr5	115151348	115152713	NM_001801	-	1	27580	0.0787554	0.0367988	0.467255
SHC3	chr9	91792662	91793611	NM_016848	-	1	27647	0.433155	3.0175	6.96634
C16orf62	chr16	19566486	19567388	NM_020314	+	1	27761	27.5644	22.4105	0.813023
COMP	chr19	18899037	18902284	NM_000095	-	1	28098	0	0.0367988	#DIV/0!
FAM127C	chrX	134155996	134156602	NM_001078173	-	1	28266	1.85075	1.39836	0.755561
PRKACB	chr1	84543146	84544261	NM_207578	+	1	28545	153.179	130.562	0.852349
VAMP5	chr2	85811340	85811855	NM_006634	+	1	28739	2.55955	1.76634	0.690099
TMEM181	chr6	158957220	158958677	NM_020823	+	1	28972	77.141	74.4073	0.964562
FGF14	chr13	102568425	102569495	NM_004115	-	1	30235	0.393777	0	0
TFAP2B	chr6	50787286	50788091	NM_003221	+	1	30441	0	0	#DIV/0!
CAND2	chr3	12837992	12838359	NM_001162499	+	1	30762	1.22071	0.772776	0.633055
FAM159B	chr5	63986189	63986974	NM_001164442	+	1	30904	0.118133	0.147195	1.24601
LOC389458	chr7	5111620	5112088	NR_015343	+	1	31292	0.0393777	0	0
FAM162B	chr6	117085739	117086942	NM_001085480	-	1	31439	0.196889	0.220793	1.12141
SIM1	chr6	100912071	100913337	NM_005068	-	1	31450	0	0	#DIV/0!
NKX2-4	chr20	21376358	21378245	NM_033176	-	1	31612	0	0	#DIV/0!
C14orf132	chr14	96505311	96506402	NM_001252507	+	1	31969	4.25279	3.1279	0.735493
HCN1	chr5	45695394	45696510	NM_021072	-	1	32039	0	0.147195	#DIV/0!
WWTR1-AS1	chr3	149374709	149376300	NR_040250	+	1	32064	0.0787554	0	0
CDK2AP1	chr12	123754049	123754373	NM_001270433	-	1	32895	44.1424	32.1622	0.7286
LOC284395	chr19	30015781	30021367	NR_040029	-	1	33457	0	0	#DIV/0!
MCC	chr5	112823256	112824304	NM_001085377	-	1	33478	5.51288	4.26867	0.774308
ZNF525	chr19	53868810	53869485	NR_003699	+	1	33645	5.63101	4.96784	0.882229
HOTAIR	chr12	54366815	54369103	NR_047517	-	1	33756	0	0.147195	#DIV/0!
GALNT9	chr12	132689880	132690197	NM_021808	-	1	35219	0.0393777	0.0367988	0.934509
ADAMTS5	chr21	28337856	28340237	NM_007038	-	1	35332	0.905688	1.21436	1.34082
NOTO	chr2	73429283	73430647	NM_001134462	+	1	35487	0	0	#DIV/0!
FIGLA	chr2	71017028	71017976	NM_001004311	-	1	35513	0	0	#DIV/0!
ZNF154	chr19	58220189	58220517	NM_001085384	-	1	35991	0.826932	0.846373	1.02351
CNIH3	chr1	224803637	224805314	NM_152495	+	1	36102	0.196889	0.588781	2.99043
SYDE1	chr19	15217951	15218617	NM_033025	+	1	36245	0.826932	0.478385	0.578506
CACNA1C-AS1	chr12	2800139	2801062	NR_045725	-	1	36391	0.51191	0.809574	1.58148
WWTR1	chr3	149374709	149376300	NM_015472	-	1	36562	16.9718	10.7085	0.630956
HOXC10	chr12	54378696	54380102	NM_017409	+	1	36791	0	0	#DIV/0!
BEND4	chr4	42152766	42154984	NM_001159547	-	1	37122	2.16577	0.772776	0.356813
KIAA1024	chr15	79724099	79725643	NM_015206	+	1	37522	0.945065	2.35513	2.49202
CALN1	chr7	71800757	71802768	NM_001017440	-	1	37523	0.630044	1.72955	2.74512
C17orf82	chr17	59488115	59490485	NM_203425	+	1	37524	0.0393777	0	0
FGR	chr1	27960567	27961023	NM_005248	-	1	37725	1.65386	0.993569	0.600756
C6orf147	chr6	74019428	74020053	NR_027005	-	1	38140	0.551288	0.33119	0.600756
SOX14	chr3	137482964	137484454	NM_004189	+	1	38805	0	0.367988	#DIV/0!
GLDC	chr9	6645080	6645975	NM_000170	-	1	39153	0.0787554	0.0367988	0.467255
DCPS	chr11	126173539	126174042	NM_014026	+	1	39659	11.3802	7.02858	0.617617
FOXF2	chr6	1389139	1391393	NM_001452	+	1	40223	2.1264	2.17113	1.02104
MIR3150A	chr8	96085269	96085747	NR_036105	+	1	40587	0	0	#DIV/0!
FOXD4L1	chr2	114256775	114258043	NM_012184	+	1	40653	0.157511	0.0735977	0.467255
DOC2B	chr17	29994	31868	NM_003585	-	1	40941	0	0.110397	#DIV/0!
GPRC5B	chr16	19894965	19897156	NM_016235	-	1	132	3.30773	5.29903	1.60202
FAM3B	chr21	42688746	42689085	NM_058186	+	1	141	0.157511	0	0
MPDZ	chr9	13278312	13279805	NM_001261406	-	1	176	3.11084	3.38549	1.08829
CELF4	chr18	35144907	35147628	NM_001025089	-	1	196	0.236266	0	0
MAPT	chr17	43971410	43975040	NM_016835	+	1	660	0.472533	0.294391	0.623006
USH1G	chr17	72918995	72921019	NM_173477	-	1	872	0	0	#DIV/0!
PDLIM3	chr4	186455983	186456864	NM_001257963	-	1	945	10.1595	7.43337	0.73167
COL1A1	chr17	48276877	48279008	NM_000088	-	1	967	46.5838	55.9342	1.20072
SLC6A2	chr16	55689598	55690895	NM_001043	+	1	1204	0	0.0735977	#DIV/0!
PAK7	chr20	9819271	9819861	NM_177990	-	1	1521	0	0	#DIV/0!
ST3GAL4	chr11	126225355	126226073	NM_001254757	+	1	1582	114.274	13.6156	0.119148
NEUROG3	chr10	71331926	71333392	NM_020999	-	1	1987	0.393777	0	0
NCAN	chr19	19322675	19322916	NM_004386	+	1	2014	0.0787554	0	0
PRDM12	chr9	133534534	133542394	NM_021619	+	1	2145	0	0.257592	#DIV/0!
EMX1	chr2	73143055	73148260	NM_004097	+	1	2400	0	0	#DIV/0!
MMP2	chr16	55513220	55513526	NM_004530	+	1	2439	28.0369	30.727	1.09595
HS6ST3	chr13	96742138	96744162	NM_153456	+	1	2737	0	0	#DIV/0!
EPO	chr7	100318106	100318684	NM_000799	+	1	2763	0	0	#DIV/0!
TCF7	chr5	133449320	133451260	NM_003202	+	1	3000	10.0019	20.7913	2.07873
HECW2	chr2	197457392	197458522	NM_020760	-	1	3035	0.590666	1.50875	2.55433
COL13A1	chr10	71561302	71562876	NM_080802	+	1	3137	0.196889	0.294391	1.49521
MYH11	chr16	15950839	15951266	NM_001040114	-	1	4271	81.7481	57.4062	0.702232
LHX2	chr9	126773246	126780953	NM_004789	+	1	4326	0.0393777	0.147195	3.73804
HSD11B1L	chr19	5680433	5681417	NM_001267869	+	1	4458	0.354399	0.551983	1.55752
ASAP1	chr8	131455248	131456285	NM_018482	-	1	4459	17.4837	17.553	1.00397
ZNF266	chr19	9545783	9546302	NM_006631	-	1	4463	16.6962	15.8603	0.949937
ADAM11	chr17	42835776	42836242	NM_002390	+	1	4499	0	0	#DIV/0!
IGFBP3	chr7	45960137	45961347	NM_001013398	-	1	5138	27.6432	23.7353	0.85863
MARCH11	chr5	16179064	16180420	NM_001102562	-	1	5599	0	0	#DIV/0!
LPAR3	chr1	85358359	85359187	NM_012152	-	1	5610	0.0393777	0.147195	3.73804
GJA4	chr1	35258564	35258791	NM_002060	+	1	6019	2.08702	0.441586	0.211587
HAP1	chr17	39889956	39891489	NM_177977	-	1	6418	0	0	#DIV/0!
BVES	chr6	105584148	105585621	NM_147147	-	1	6442	1.10258	1.25116	1.13476
SCUBE2	chr11	9112461	9113459	NM_020974	-	1	7624	0.984443	0.809574	0.822368
SHD	chr19	4279042	4279809	NM_020209	+	1	7653	4.68595	1.54555	0.329827
KANK3	chr19	8407674	8408338	NM_198471	-	1	7690	1.26009	1.72955	1.37256
EMID1	chr22	29601547	29602291	NM_001267895	+	1	7817	0.551288	0.220793	0.400504
C19orf70	chr19	5680433	5681417	NM_205767	-	1	8010	7.91492	6.69739	0.846172
ZNF471	chr19	57018743	57019506	NM_020813	+	1	8048	1.37822	0.294391	0.213602
C15orf59	chr15	74044561	74045885	NM_001039614	-	1	8125	0	0.0367988	#DIV/0!
FLRT2	chr14	85996494	85996958	NM_013231	+	1	8627	3.78026	2.06074	0.54513
MIR3687	chr21	9825442	9826296	NR_037458	+	1	9489	0.0393777	0	0
HSF4	chr16	67196792	67199988	NM_001040667	+	1	9536	1.53573	6.80779	4.43293
CCDC13	chr3	42814567	42814893	NM_144719	-	1	9618	0.315022	0.294391	0.934509
KCNMA1	chr10	79396095	79398495	NM_001271521	-	1	9977	4.48906	2.87031	0.639401
FGF4	chr11	69588826	69590546	NM_002007	-	1	10190	0.0787554	0	0
NXPH2	chr2	139537692	139538650	NM_007226	-	1	10287	0	0	#DIV/0!
KCNA6	chr12	4918273	4919657	NM_002235	+	1	10308	1.89013	4.48946	2.37521
FOXB2	chr9	79633326	79636030	NM_001013735	+	1	10556	0	0	#DIV/0!
MIR124-1	chr8	9760750	9761643	NR_029668	-	1	10677	0	0	#DIV/0!
GRIK3	chr1	37498377	37500624	NM_000831	-	1	10939	0.236266	0.441586	1.86902
PALLD	chr4	169753048	169754535	NM_001166110	+	1	11028	82.1419	67.4891	0.821615
RYR1	chr19	38924239	38924519	NM_000540	+	1	11197	0.315022	0.404787	1.28495
CNTN5	chr11	98891543	98891821	NM_001243270	+	1	11470	0	0	#DIV/0!
LINC00599	chr8	9760750	9761643	NR_024281	-	1	11496	0	0	#DIV/0!
GATA2	chr3	128205495	128212274	NM_032638	-	1	11588	1.73262	6.2558	3.6106
AARD	chr8	117950472	117950717	NM_001025357	+	1	12237	0.0787554	0	0
PDGFC	chr4	157892685	157893286	NM_016205	-	1	12405	3.50462	3.0543	0.871509
CLEC4GP1	chr19	7852932	7854557	NR_002931	+	1	12554	0	0	#DIV/0!
HHEX	chr10	94448693	94450479	NM_002729	+	1	12670	2.08702	0.772776	0.370277
FAM69B	chr9	139606300	139607433	NM_152421	+	1	12734	1.22071	1.10397	0.904364
KCNK2	chr1	215256051	215256636	NM_001017425	+	1	12771	0.354399	0	0
LOC728739	chr12	108297426	108297743	NR_037629	-	1	13033	0.0787554	0.183994	2.33627
CHD5	chr1	6239237	6240814	NM_015557	-	1	13037	0.157511	0.0735977	0.467255
TMEM155	chr4	122685860	122686565	NM_152399	-	1	13225	0.0787554	0	0
TMEM240	chr1	1474962	1475220	NM_001114748	-	1	13478	0	0	#DIV/0!
FLT1	chr13	29067788	29069977	NM_001160031	-	1	13699	1.65386	2.46552	1.49076
GRM4	chr6	34111735	34113944	NR_046379	-	1	13780	0.275644	0	0
PRKD1	chr14	30396210	30397420	NM_002742	-	1	13941	2.00826	0.95677	0.476416
DTX1	chr12	113494389	113495534	NM_004416	+	1	14479	5.23724	2.20793	0.421583
FGF2	chr4	123747740	123748980	NM_002006	+	1	14503	5.59164	4.04787	0.723916
FOLH1	chr11	49229717	49230040	NM_001193472	-	1	14543	0	0.147195	#DIV/0!
ZNF426	chr19	9648934	9649410	NM_024106	-	1	14685	4.72533	3.45909	0.732032
ANKRD6	chr6	90142751	90143635	NM_014942	+	1	14751	4.01653	4.41586	1.09942
MMP25	chr16	3095600	3097033	NM_022468	+	1	15520	1.92951	0.919971	0.47679
SCRN1	chr7	30028518	30029822	NM_001145514	-	1	15799	17.9169	12.1804	0.67983
PAX6	chr11	31831620	31839038	NM_000280	-	1	16032	0.945065	1.25116	1.32389
VWDE	chr7	12443163	12443705	NM_001135924	-	1	16167	0.354399	0	0
RASGRP2	chr11	64509433	64513826	NM_001098671	-	1	16221	2.87457	0.367988	0.128015
DOCK10	chr2	225906653	225907464	NM_014689	-	1	16379	22.4847	10.5981	0.471346
SLC27A6	chr5	128300800	128301329	NM_014031	+	1	16440	0.236266	0.147195	0.623006
GDF7	chr2	20865289	20867589	NM_182828	+	1	16470	0.236266	0	0
CPZ	chr4	8594412	8594777	NM_001014448	+	1	16567	0.393777	0.367988	0.934509
BVES-AS1	chr6	105584148	105585621	NR_037157	+	1	16622	0	0	#DIV/0!
WASH2P	chr2	114341301	114342298	NR_024077	+	1	16788	6.30044	5.81422	0.922828
MIR3648	chr21	9825442	9826296	NR_037421	+	1	16847	0.0393777	0	0
COL18A1	chr21	46824531	46826234	NM_130445	+	1	17779	5.90666	5.66702	0.959429
TMEM200A	chr6	130686414	130687736	NM_001258276	+	1	17907	37.4482	10.3405	0.276127
SERTM1	chr13	37247949	37248463	NM_203451	+	1	18016	0.157511	0	0
GLRA3	chr4	175750330	175750584	NM_006529	-	1	18091	0.118133	0	0
OTOP2	chr17	72918995	72921019	NM_178160	+	1	18306	16.6174	0	0
EPHA8	chr1	22889595	22890096	NM_001006943	+	1	18609	0	0	#DIV/0!
NKX6-3	chr8	41503916	41504266	NM_152568	-	1	18694	0	0	#DIV/0!
CDH2	chr18	25755414	25758175	NM_001792	-	1	18848	0.315022	0.183994	0.584068
CYP11A1	chr15	74658038	74658574	NM_001099773	-	1	18870	0.0787554	0.110397	1.40176
RTN4RL1	chr17	1927051	1929408	NM_178568	-	1	19205	0.157511	1.21436	7.7097
RPS6KA3	chrX	20284127	20286811	NM_004586	-	1	19366	151.092	159.597	1.05629
PKIA	chr8	79428433	79428754	NM_181839	+	1	19859	0.748177	0.294391	0.393478
SAMD3	chr6	130686414	130687736	NM_001258275	-	1	19865	0.669421	0.367988	0.549711
FUZ	chr19	50316211	50316469	NR_033269	-	1	19908	1.69324	0.95677	0.565052
DAPK1	chr9	90112514	90113817	NM_004938	+	1	20065	13.7034	32.383	2.36313
ZCCHC16	chrX	111325082	111325302	NM_001004308	+	1	20394	0	0	#DIV/0!
HMX3	chr10	124894075	124897366	NM_001105574	+	1	21052	0	0	#DIV/0!
FLJ39051	chr11	126225355	126226073	NR_033839	-	1	21682	0	0.0735977	#DIV/0!
UNCX	chr7	1269165	1282864	NM_001080461	+	1	21815	0	0	#DIV/0!
IQSEC3	chr12	175666	176400	NM_001170738	+	1	21881	0.118133	0.0367988	0.311503
PIEZO2	chr18	11148307	11149936	NM_022068	-	1	21982	2.08702	0.735977	0.352645
GDF6	chr8	97171805	97172022	NM_001001557	-	1	22042	0	0	#DIV/0!
VWCE	chr11	61061751	61063063	NM_152718	-	1	22130	0.157511	0.0367988	0.233627
CHCHD6	chr3	126422888	126423609	NM_032343	+	1	22170	1.92951	1.28796	0.667507
NPPC	chr2	232789995	232791286	NM_024409	-	1	23111	0.590666	0	0
ZFHX4-AS1	chr8	77594255	77594860	NR_024360	-	1	23364	0	0	#DIV/0!
DKFZp686K1684	chr11	31831620	31839038	NR_033971	+	1	24193	0	0	#DIV/0!
DGKI	chr7	137531125	137532382	NM_004717	-	1	24370	0.0787554	0.110397	1.40176
GIPC3	chr19	3585357	3585947	NM_133261	+	1	24536	0.826932	0.993569	1.20151
NKAIN2	chr6	124124177	124125309	NM_153355	+	1	24763	0	0	#DIV/0!
DMRTA2	chr1	50884228	50891471	NM_032110	-	1	24948	0	2.20793	#DIV/0!
CACNG3	chr16	24267040	24267527	NM_006539	+	1	25083	0	0	#DIV/0!
RAB6B	chr3	133613566	133615174	NM_016577	-	1	25338	1.10258	0.772776	0.700882
DNM1P46	chr15	100346724	100347454	NR_003260	-	1	26670	0.0393777	0	0
TNFRSF8	chr1	12123488	12124148	NM_001243	+	1	27147	0	0.404787	#DIV/0!
PARVB	chr22	44419824	44420790	NM_013327	+	1	27431	0.472533	0.33119	0.700882
RAB39B	chrX	154493303	154493907	NM_171998	-	1	27632	1.02382	1.06717	1.04234
CDK5R2	chr2	219824151	219825864	NM_003936	+	1	27815	0.315022	0.0735977	0.233627
RPL39L	chr3	186856927	186857659	NM_052969	-	1	27928	0.826932	0.0735977	0.0890009
RNF180	chr5	63461448	63462106	NM_178532	+	1	28274	0.86631	0.183994	0.212388
EBF3	chr10	131761169	131771696	NM_001005463	-	1	28683	0.0787554	0.551983	7.00882
DBX2	chr12	45444202	45445386	NM_001004329	-	1	28719	0	0	#DIV/0!
ZNF671	chr19	58238585	58239028	NM_024833	-	1	28909	1.49635	1.43515	0.959102
KDR	chr4	55991402	55992171	NM_002253	-	1	28913	4.48906	8.61093	1.9182
NTN1	chr17	8924167	8926920	NM_004822	+	1	29238	0.787554	2.68632	3.41096
BSN	chr3	49591578	49592534	NM_003458	+	1	29803	0.708799	0.551983	0.778758
BMP7	chr20	55840216	55841794	NM_001719	-	1	29916	4.52844	1.17756	0.260037
HIST2H3D	chr1	149784592	149785212	NM_001123375	-	1	29964	0.0787554	0.147195	1.86902
RNF165	chr18	43913345	43914477	NM_152470	+	1	30061	0	0	#DIV/0!
NEURL	chr10	105253191	105254428	NM_004210	+	1	30112	12.9946	22.7049	1.74725
ECEL1	chr2	233350278	233352974	NM_004826	-	1	30337	0.157511	0	0
TRPC5	chrX	111325082	111325302	NM_012471	-	1	30346	0.0787554	0.294391	3.73804
ADAMTS14	chr10	72432242	72432738	NM_080722	+	1	30471	0.433155	0.993569	2.2938
EXO5	chr1	40974056	40974786	NM_022774	+	1	30654	2.87457	0.62558	0.217625
CABP7	chr22	30116081	30117160	NM_182527	+	1	30888	1.73262	2.75991	1.59291
FAT4	chr4	126235895	126238930	NM_024582	+	1	30913	4.68595	14.0572	2.99985
HLF	chr17	53342198	53343061	NM_002126	+	1	31172	2.08702	4.15827	1.99244
HBM	chr16	214343	216720	NM_001003938	+	1	31281	0	0	#DIV/0!
ZNF287	chr17	16472074	16472800	NM_020653	-	1	31492	1.45698	1.14076	0.782967
ARHGAP22	chr10	49812852	49813352	NM_001256024	-	1	31928	0.315022	0.147195	0.467255
PDX1	chr13	28494001	28496099	NM_000209	+	1	32098	0.905688	6.403	7.06976
FBXL16	chr16	755037	756696	NM_153350	-	1	32252	0.787554	1.25116	1.58867
SLC6A17	chr1	110692988	110694264	NM_001010898	+	1	32780	0	0.0367988	#DIV/0!
LOC441666	chr10	42862953	42863216	NR_024380	-	1	32789	0.118133	0.0735977	0.623006
EFNB3	chr17	7608376	7608956	NM_001406	+	1	33656	0.826932	0.735977	0.890009
CLDN5	chr22	19510871	19512254	NM_001130861	-	1	33814	1.22071	1.69275	1.38669
TPST1	chr7	65669965	65670945	NM_003596	+	1	34007	2.24453	1.21436	0.541032
ZFHX4	chr8	77594255	77594860	NM_024721	+	1	34129	0.275644	0.0367988	0.133501
ZNF677	chr19	53757819	53758148	NM_182609	-	1	35348	0.236266	0	0
DPYSL3	chr5	146888750	146889840	NM_001197294	-	1	36214	13.3884	9.4941	0.709128
PAX9	chr14	37126786	37128274	NM_006194	+	1	36549	0.590666	5.37263	9.09589
PP12613	chr4	122685860	122686565	NR_024365	+	1	36602	0	0	#DIV/0!
MIR5691	chr11	9112461	9113459	NR_049874	-	1	37406	0	0	#DIV/0!
ZFPM2	chr8	106330518	106332120	NM_012082	+	1	37761	2.44142	0.220793	0.0904364
PTPLAD2	chr9	21031513	21031823	NM_001010915	-	1	38032	1.18133	1.43515	1.21486
BSN-AS2	chr3	49591578	49592534	NR_038866	-	1	38228	0	0	#DIV/0!
OCA2	chr15	28344188	28344489	NM_000275	-	1	39485	0.0393777	0	0
CKMT1B	chr15	43886013	43886625	NM_020990	+	1	39515	45.6782	19.209	0.420529
CNTNAP3B	chr9	43684674	43685278	NM_001201380	+	1	39920	0.826932	1.03037	1.24601
COL24A1	chr1	86621278	86622871	NM_152890	-	1	40305	0.315022	0.183994	0.584068
RGS6	chr14	72398664	72399554	NM_001204424	+	1	592	0.0787554	1.58235	20.0919
CYS1	chr2	10219802	10221016	NM_001037160	-	1	5679	0.433155	0.735977	1.69911
TRPA1	chr8	72987480	72988023	NM_007332	-	1	7709	11.1045	14.2044	1.27915
MEGF6	chr1	3527619	3528078	NM_001409	-	1	10369	2.00826	10.6717	5.31388
APBB2	chr4	40858884	40859162	NM_001166051	-	1	13383	17.6412	22.4105	1.27035
HTR1E	chr6	87647253	87647707	NM_000865	+	1	29680	0	0	#DIV/0!
GRIN3A	chr9	104499849	104501076	NM_133445	-	1	30898	2.59893	0.62558	0.240707
STAC	chr3	36421702	36422210	NM_003149	+	1	32904	0.0393777	0.0367988	0.934509
DLG3	chrX	69665102	69665355	NM_021120	+	1	95	83.4414	57.259	0.686218
FERMT2	chr14	53417108	53418339	NM_001134999	-	1	105	6.85172	3.42229	0.499479
CACNA1E	chr1	181451311	181452049	NM_001205293	+	1	152	0.590666	1.21436	2.05592
CD109	chr6	74405600	74406021	NM_133493	+	1	340	0.984443	1.36156	1.38307
VASH2	chr1	213123647	213125092	NM_001136474	+	1	498	0.905688	0.33119	0.365677
FBLN1	chr22	45898294	45899357	NM_006487	+	1	501	11.9708	7.83815	0.654771
TTC9B	chr19	40723104	40724389	NM_152479	-	1	553	0.0787554	0	0
PPP1R3F	chrX	49125645	49127200	NM_033215	+	1	859	0.433155	0.33119	0.764598
CD81	chr11	2398223	2399598	NM_004356	+	1	938	49.6159	33.3397	0.671957
MTMR7	chr8	17270603	17271120	NM_004686	-	1	1007	2.32329	3.1647	1.36217
GABRB3	chr15	27016892	27018943	NM_021912	-	1	1115	4.96159	0.551983	0.111251
SKAP2	chr7	26903869	26904753	NM_003930	-	1	1231	40.4803	5.37263	0.132722
BCL2L11	chr2	111875206	111880965	NM_001204108	+	1	1238	33.5104	22.6681	0.676448
ASTN1	chr1	177133392	177133846	NM_004319	-	1	1244	0	0	#DIV/0!
SHOX2	chr3	157822973	157823836	NM_006884	-	1	1316	0.157511	0	0
BCDIN3D-AS1	chr12	50221558	50222609	NR_027499	+	1	1321	0.984443	2.42872	2.4671
C20orf166-AS1	chr20	61147457	61147787	NR_033263	-	1	1395	0	0	#DIV/0!
LPCAT1	chr5	1523025	1524588	NM_024830	-	1	1558	17.5625	14.1676	0.806695
SCN5A	chr3	38690409	38691513	NM_001099405	-	1	1599	0.0393777	0.220793	5.60705
FOXD4L3	chr9	70917888	70919111	NM_199135	+	1	1719	0.157511	0.220793	1.40176
NPY5R	chr4	164264821	164265772	NM_006174	+	1	1891	0	0	#DIV/0!
LOC388242	chr16	29477389	29478502	NR_002556	-	1	1908	3.22897	1.47195	0.455858
CT47A8	chrX	120065033	120066002	NM_001080139	-	1	2013	0	0	#DIV/0!
LYNX1	chr8	143858279	143859411	NM_177477	-	1	2046	0.551288	1.21436	2.20277
PCSK2	chr20	17206528	17206952	NM_001201528	+	1	2136	0.945065	0.0735977	0.0778758
HTR2C	chrX	113818519	113819453	NM_001256760	+	1	2198	0	0	#DIV/0!
TBX1	chr22	19742901	19744729	NM_080647	+	1	2321	0	0	#DIV/0!
MMD2	chr7	4998405	4998950	NM_198403	-	1	2435	0	0	#DIV/0!
KCNH4	chr17	40332597	40333471	NM_012285	-	1	2454	0.236266	0.0735977	0.311503
LTBP3	chr11	65325081	65326209	NM_021070	-	1	2499	5.4735	6.07181	1.10931
MAATS1	chr3	119421855	119422334	NM_033364	+	1	2690	0.51191	0.183994	0.359427
STMN3	chr20	62283516	62284835	NM_015894	-	1	2822	3.62275	2.31833	0.639936
NAV2	chr11	19733936	19735320	NM_145117	+	1	2871	19.3738	28.1143	1.45115
SPI1	chr11	47399788	47400006	NM_003120	-	1	2948	2.00826	1.14076	0.568035
LOC284801	chr20	26188638	26190348	NR_040095	-	1	2968	0	0	#DIV/0!
ZFR2	chr19	3868586	3869217	NM_015174	-	1	3347	0	0	#DIV/0!
C14orf39	chr14	60951976	60952946	NM_174978	-	1	3435	0	0	#DIV/0!
GRIN1	chr9	140033235	140034176	NM_007327	+	1	3541	0.236266	0.220793	0.934509
MAPK14	chr6	35995245	35996372	NM_001315	+	1	3702	33.1954	34.2597	1.03206
LRIF1	chr1	111505881	111507007	NM_018372	-	1	3716	6.26106	7.91175	1.26364
SOX3	chrX	139585867	139588578	NM_005634	-	1	3866	0	0	#DIV/0!
LENG9	chr19	54974175	54976819	NM_198988	-	1	3939	2.40204	3.71668	1.5473
ANKRD20A4	chr9	69380679	69382408	NM_001098805	+	1	4303	4.01653	2.50232	0.623006
SH3RF3-AS1	chr2	109744585	109746833	NR_029193	-	1	4335	0.157511	0.110397	0.700882
SLC5A7	chr2	108602824	108603467	NM_021815	+	1	4357	0.0393777	0	0
LINC00617	chr14	96342209	96343570	NR_038861	+	1	4483	0	0	#DIV/0!
PLEKHG4	chr16	67312896	67313731	NM_001129731	+	1	4529	2.1264	5.29903	2.49202
FOXP4	chr6	41513652	41516189	NM_001012426	+	1	4645	41.6616	46.8449	1.12441
HOXD13	chr2	176956504	176956707	NM_000523	+	1	4659	20.8702	20.7913	0.996222
ADRBK2	chr22	25960959	25961368	NM_005160	+	1	4843	11.8527	7.47016	0.63025
MAPK4	chr18	48085838	48087589	NM_002747	+	1	4874	0.472533	0.147195	0.311503
FOXC2	chr16	86599355	86602649	NM_005251	+	1	4889	0	0	#DIV/0!
GLRB	chr4	157997166	157997686	NM_001166060	+	1	5000	0	0	#DIV/0!
IFFO1	chr12	6664425	6665336	NR_036467	-	1	5045	2.04764	1.21436	0.593054
SLC7A3	chrX	70150675	70151002	NM_032803	-	1	5114	0	0.0367988	#DIV/0!
PPIE	chr1	40204312	40204739	NR_036543	+	1	5526	10.3563	10.3405	0.998468
PLEKHD1	chr14	69950459	69951916	NM_001161498	+	1	5692	0	0	#DIV/0!
CDC14C	chr7	48963967	48964348	NR_003595	+	1	5777	1.14195	2.72311	2.38461
LPPR1	chr9	103790612	103791764	NM_207299	+	1	5988	0.0393777	0.110397	2.80353
KIF1C	chr17	4900357	4901798	NM_006612	+	1	6020	41.5435	34.0021	0.818471
SPON2	chr4	1164515	1166582	NM_001128325	-	1	6037	1.69324	4.08467	2.41234
STEAP1B	chr7	22539545	22540022	NM_001164460	-	1	6040	0.0393777	0.0367988	0.934509
TOP1MT	chr8	144441870	144442438	NM_001258447	-	1	6309	3.81964	7.50696	1.96536
OTOP3	chr17	72931729	72932601	NM_178233	+	1	6407	0.0393777	0	0
DRAXIN	chr1	11750701	11752651	NM_198545	+	1	6448	0	0	#DIV/0!
SLIT2	chr4	20253276	20256868	NM_004787	+	1	6540	2.16577	0.846373	0.390795
RSPO1	chr1	38099677	38100864	NM_001242910	-	1	6570	0.236266	0.404787	1.71327
KLF8	chrX	56258951	56259159	NM_001159296	+	1	6598	2.59893	2.83351	1.09026
CXCL12	chr10	44879714	44882391	NM_199168	-	1	6599	9.68692	7.28617	0.752166
PROB1	chr5	138727710	138730911	NM_001161546	-	1	6699	1.96889	1.28796	0.654156
NXPH1	chr7	8473139	8475199	NM_152745	+	1	6800	0	0	#DIV/0!
DCAF12L1	chrX	125685711	125686941	NM_178470	-	1	6874	0	0	#DIV/0!
GDNF	chr5	37834671	37835128	NM_001190469	-	1	6947	0.551288	0.441586	0.801008
ESX1	chrX	103498706	103499843	NM_153448	-	1	7468	0	0	#DIV/0!
ARFGAP3	chr22	43252653	43253667	NM_014570	-	1	7637	41.7798	32.5302	0.778611
IGFBPL1	chr9	38423947	38424584	NM_001007563	-	1	7736	1.0632	0	0
SGIP1	chr1	66998728	66999060	NM_032291	+	1	7766	0.157511	0.404787	2.5699
TCERG1L	chr10	133109193	133111052	NM_174937	-	1	8044	0	0	#DIV/0!
CYP1A1	chr15	75018186	75019336	NM_000499	-	1	8056	0	0	#DIV/0!
NGFRAP1	chrX	102631321	102632073	NM_206917	+	1	8172	7.16675	0.919971	0.128367
ONECUT3	chr19	1753216	1755606	NM_001080488	+	1	8304	0.0787554	0	0
WBSCR17	chr7	70596228	70598382	NM_022479	+	1	8424	0.196889	0.220793	1.12141
PROK2	chr3	71834068	71834653	NM_001126128	-	1	8426	0.0393777	0.183994	4.67255
FTH1P18	chrX	37061615	37062006	NM_001271682	-	1	8476	0.0393777	0	0
ARL4C	chr2	235404502	235406541	NM_005737	-	1	8545	12.1677	10.4877	0.861926
AGAP1	chr2	236401799	236403946	NM_001037131	+	1	8629	49.3403	60.6445	1.22911
ZNF583	chr19	56915356	56915856	NM_001159861	+	1	9023	1.45698	0.846373	0.580911
SRSF12	chr6	89827134	89828122	NM_080743	-	1	9028	0.157511	0.147195	0.934509
GCM2	chr6	10881846	10882051	NM_004752	-	1	9126	0	0	#DIV/0!
TIMP2	chr17	76920684	76921961	NM_003255	-	1	9150	36.7394	41.7299	1.13583
PPM1N	chr19	46001830	46002686	NM_001080401	+	1	9243	0.157511	0.551983	3.50441
CRHBP	chr5	76249435	76250528	NM_001882	+	1	9284	0.630044	0.33119	0.525661
AJUBA	chr14	23449886	23452174	NM_032876	-	1	9368	1.02382	3.64309	3.55832
HDAC9	chr7	18125914	18127009	NM_001204144	+	1	9475	8.97812	2.50232	0.278713
MKX	chr10	28030182	28035211	NM_001242702	-	1	9545	0.0393777	0.0735977	1.86902
DUSP22	chr6	291948	292839	NM_020185	+	1	9583	4.72533	5.77742	1.22265
PODN	chr1	53527572	53528974	NM_001199080	+	1	9589	1.33884	2.61272	1.95148
PTGFR	chr1	78956624	78957516	NM_000959	+	1	9630	1.02382	2.24473	2.1925
GTF3A	chr13	27998586	27999178	NM_002097	+	1	9688	25.0442	22.9993	0.918346
LINC00665	chr19	36822395	36822690	NR_038278	-	1	9845	0.0787554	0.367988	4.67255
LOC283143	chr11	115630398	115631117	NR_034148	-	1	10047	0.0787554	0	0
KCNE1L	chrX	108867762	108868486	NM_012282	-	1	10066	0	0	#DIV/0!
ZIK1	chr19	58094739	58095764	NM_001010879	+	1	10383	0.393777	0.110397	0.280353
FAM159A	chr1	53098629	53099303	NM_001042693	+	1	10585	0.708799	0.0735977	0.103834
SYT14	chr1	210111179	210112054	NR_027459	+	1	10676	0	0.0367988	#DIV/0!
GAD1	chr2	171672310	171675447	NM_013445	+	1	10679	0.236266	0.0367988	0.155752
ADAM12	chr10	128076155	128077482	NM_021641	-	1	10748	0.787554	0.147195	0.186902
KANK4	chr1	62784136	62785133	NM_181712	-	1	10756	2.75644	0.846373	0.307053
AKAP2	chr9	112810858	112811128	NM_001004065	+	1	10871	46.5445	30.2118	0.649096
PLAC9	chr10	81892222	81892640	NM_001012973	+	1	10975	0.354399	0.33119	0.934509
SLC24A4	chr14	92788913	92789204	NM_153648	+	1	11012	0.315022	0.846373	2.68671
BEX2	chrX	102565314	102566034	NM_001168399	-	1	11044	4.13466	1.54555	0.373804
TCF7L1	chr2	85359956	85362593	NM_031283	+	1	11126	1.772	2.13433	1.20448
HBA2	chr16	222369	223447	NM_000517	+	1	11165	1.73262	1.69275	0.976987
GABRA5	chr15	27112030	27113479	NM_001165037	+	1	11183	0	0	#DIV/0!
TM6SF2	chr19	19383703	19384283	NM_001001524	-	1	11215	1.73262	0.0367988	0.0212388
ZNF75D	chrX	134429630	134429854	NM_007131	-	1	11287	5.86728	9.31011	1.58678
DNER	chr2	230578062	230579981	NM_139072	-	1	11420	0.275644	0	0
COX7A1	chr19	36642327	36643585	NM_001864	-	1	11438	0.393777	0.551983	1.40176
SEMA6C	chr1	151118049	151119373	NM_001178061	-	1	11587	0.196889	0.478385	2.42972
PEX7	chr6	137143635	137144445	NM_000288	+	1	11953	6.61546	6.403	0.967884
SULT4A1	chr22	44257942	44258612	NM_014351	-	1	11965	0	0	#DIV/0!
PTHLH	chr12	28123023	28123773	NM_198966	-	1	12341	0.118133	0.33119	2.80353
HIST3H2BB	chr1	228645196	228646434	NM_175055	+	1	12346	0.0787554	0	0
RAD51C	chr17	56769865	56770295	NM_002876	+	1	12417	1.22071	1.61915	1.3264
TEX14	chr17	56769865	56770295	NM_198393	-	1	12447	0	0.0367988	#DIV/0!
HOXC5	chr12	54427025	54428709	NM_018953	+	1	12657	0	0	#DIV/0!
FBXO17	chr19	39465846	39466403	NM_024907	-	1	12703	0.354399	0.735977	2.07669
NR2E1	chr6	108485671	108490539	NM_003269	+	1	12785	0	0	#DIV/0!
LOC100133669	chr8	144099456	144099731	NR_026913	-	1	12954	0.0393777	0	0
ESYT3	chr3	138153269	138154621	NM_031913	+	1	13262	0.748177	0.588781	0.786955
DACT2	chr6	168719681	168720495	NM_214462	-	1	13320	0.984443	0.588781	0.598086
ZNF175	chr19	52074311	52074536	NM_007147	+	1	13818	6.14292	2.28153	0.371407
IFITM5	chr11	299389	299635	NM_001025295	-	1	13894	0	0.0367988	#DIV/0!
ESRRG	chr1	217310749	217311178	NM_001134285	-	1	14208	0.708799	0.110397	0.155752
LOC100126784	chr11	19733936	19735320	NR_015384	-	1	14285	0.236266	0.0735977	0.311503
ANKRD53	chr2	71205563	71206529	NM_001115116	+	1	14339	0.236266	0.183994	0.778758
PHOX2A	chr11	71954816	71955659	NM_005169	-	1	14364	0.708799	0.662379	0.934509
LINC00092	chr9	98783216	98784364	NR_024129	-	1	14395	0.157511	0.0735977	0.467255
DRD4	chr11	636435	636668	NM_000797	+	1	14474	0.0393777	0	0
MIR615	chr12	54427025	54428709	NR_030753	+	1	14725	0	0	#DIV/0!
SCN4B	chr11	118023352	118024194	NM_174934	-	1	14908	1.18133	2.75991	2.33627
MYOD1	chr11	17740789	17743779	NM_002478	+	1	14988	0	0	#DIV/0!
STX2	chr12	131323203	131323959	NM_001980	-	1	15267	3.78026	1.17756	0.311503
PGLYRP1	chr19	46526046	46526334	NM_005091	-	1	15326	0.0393777	0	0
ZFP41	chr8	144328103	144329545	NM_001271156	+	1	15336	2.24453	4.48946	2.00018
RASL11B	chr4	53728037	53729000	NM_023940	+	1	15355	0.393777	0.220793	0.560705
MAD2L2	chr1	11750701	11752651	NM_001127325	-	1	15357	3.38648	2.13433	0.63025
LY6H	chr8	144240761	144242113	NM_001135655	-	1	15652	0	0.0367988	#DIV/0!
FAM150B	chr2	287353	290099	NM_001002919	-	1	15709	0.196889	0.183994	0.934509
MADCAM1	chr19	496158	496481	NM_130762	+	1	15730	1.96889	0.62558	0.317733
POPDC3	chr6	105627406	105627830	NM_022361	-	1	15767	0.0393777	0.183994	4.67255
NINL	chr20	25565437	25566547	NM_025176	-	1	15871	1.81138	0.699178	0.385993
JAK3	chr19	17958490	17958808	NM_000215	-	1	15934	10.1988	2.57592	0.25257
CTTNBP2	chr7	117512942	117513865	NM_033427	-	1	16225	3.03208	4.19507	1.38356
FBLN5	chr14	92413581	92414324	NM_006329	-	1	16242	4.29217	4.34226	1.01167
ANKRD33B	chr5	10562816	10565680	NM_001164440	+	1	16784	2.95333	1.80314	0.610546
LRRFIP1	chr2	238535561	238536840	NM_001137550	+	1	16859	161.212	85.4469	0.530027
DTNA	chr18	32073444	32074292	NM_032975	+	1	17111	1.0632	1.50875	1.41907
KRTCAP3	chr2	27664939	27665151	NM_173853	+	1	17415	11.9314	16.7803	1.40639
SVOPL	chr7	138348962	138349444	NM_174959	-	1	17522	0.157511	0	0
CPXM1	chr20	2780978	2781497	NM_019609	-	1	17693	0.315022	0.441586	1.40176
MRPS21	chr1	150266476	150266689	NM_031901	+	1	17757	15.8692	1.61915	0.102031
RBP4	chr10	95360389	95361387	NM_006744	-	1	17773	9.80505	3.90068	0.397823
MIR4488	chr11	61275825	61277329	NR_039708	+	1	17810	0	0	#DIV/0!
OSR1	chr2	19555789	19558403	NM_145260	-	1	17848	2.95333	1.72955	0.585626
ZPBP	chr7	50132572	50132921	NM_007009	-	1	17962	0	0	#DIV/0!
EPHX3	chr19	15342626	15343181	NM_001142886	-	1	17995	0.236266	0.110397	0.467255
GNG4	chr1	235811841	235814066	NM_001098721	-	1	18105	1.69324	0.0367988	0.0217328
CORO6	chr17	27949429	27950277	NM_032854	-	1	18193	0.0787554	0.0735977	0.934509
SOX11	chr2	5832041	5834208	NM_003108	+	1	18198	0	0	#DIV/0!
PTPRT	chr20	41817475	41819212	NM_133170	-	1	18270	0.708799	0.0735977	0.103834
AK4	chr1	65613041	65614898	NM_203464	+	1	18278	66.1152	39.6692	0.600001
NOS1	chr12	117798076	117799448	NM_001204218	-	1	18343	0	0	#DIV/0!
DPP6	chr7	153748407	153750444	NM_130797	+	1	18452	0.118133	0.0735977	0.623006
INCA1	chr17	4900357	4901798	NM_001167987	-	1	18672	1.65386	1.87674	1.13476
SYN1	chrX	47478670	47479515	NM_133499	-	1	18866	0.315022	0.662379	2.10265
KCNJ6	chr21	39287946	39289267	NM_002240	-	1	18992	0.393777	0.0735977	0.186902
SYCE2	chr19	13029794	13030355	NM_001105578	-	1	19417	0.315022	0.220793	0.700882
ROBO1	chr3	79067882	79068566	NM_001145845	-	1	19490	12.7584	6.2926	0.493213
MCAM	chr11	119186947	119187894	NM_006500	-	1	19539	3.1896	4.48946	1.40753
ENTPD3	chr3	40428651	40429015	NM_001248	+	1	19649	1.81138	0.551983	0.304731
NHLH2	chr1	116380359	116382364	NM_001111061	-	1	20046	0	0	#DIV/0!
NCKAP5L	chr12	50221558	50222609	NM_001037806	-	1	20091	1.81138	1.95034	1.07672
PDIA3P	chr1	146649622	146649852	NR_002305	+	1	20744	340.145	199.891	0.587665
KIAA1614	chr1	180881316	180882592	NM_020950	+	1	20850	0.0787554	0.220793	2.80353
LOC728392	chr17	5403131	5404602	NM_001162371	-	1	20955	2.75644	0.662379	0.240302
CMTM2	chr16	66612749	66613412	NM_001199317	+	1	21234	0.236266	0.257592	1.09026
APC2	chr19	1450056	1450387	NM_005883	+	1	21584	0.472533	0.699178	1.47964
PTGIS	chr20	48184193	48184833	NM_000961	-	1	21595	2.4808	1.06717	0.430171
ZNF580	chr19	56151516	56152792	NM_016202	+	1	21683	6.85172	8.13254	1.18693
ACVR1C	chr2	158453799	158454111	NM_001111031	-	1	21793	11.577	22.3737	1.93259
SOCS3	chr17	76354818	76357038	NM_003955	-	1	21929	8.85999	2.35513	0.265816
C1QL2	chr2	119914126	119916663	NM_182528	-	1	22284	0	0	#DIV/0!
MIR3663	chr10	118927021	118928132	NR_037436	-	1	22299	0	0	#DIV/0!
CLIP4	chr2	29337983	29338909	NM_024692	+	1	22378	3.1896	1.50875	0.473023
TMEM179	chr14	105070518	105071463	NM_207379	-	1	22513	0.118133	0	0
RGS10	chr10	121301478	121303169	NM_001005339	-	1	22601	4.72533	5.37263	1.13699
IRX6	chr16	55357521	55359040	NM_024335	+	1	22627	0.0393777	0	0
ATXN8OS	chr13	70681732	70682219	NR_002717	+	1	22654	0	0	#DIV/0!
GABRA4	chr4	46995128	46995872	NM_000809	-	1	22746	0.433155	0.0735977	0.169911
SOX18	chr20	62679424	62680883	NM_018419	-	1	23090	1.18133	1.21436	1.02796
FKBP1B	chr2	24272582	24273313	NM_004116	+	1	23122	5.00097	0.147195	0.0294334
NRK	chrX	105066349	105067110	NM_198465	+	1	23190	0.157511	0	0
MIR663A	chr20	26188638	26190348	NR_030386	-	1	23334	0.0787554	0.0367988	0.467255
LOC283856	chr16	56224731	56224980	NR_027078	-	1	23368	0.0787554	0.0367988	0.467255
CXCL14	chr5	134914178	134914981	NM_004887	-	1	23369	83.717	152.936	1.82682
C12orf68	chr12	48577361	48578574	NM_001013635	+	1	23376	0.157511	0.367988	2.33627
PABPC1L2B	chrX	72223598	72224080	NM_001042506	+	1	23593	0	0	#DIV/0!
PER1	chr17	8054550	8055835	NM_002616	-	1	23655	30.3208	6.403	0.211175
NCCRP1	chr19	39687597	39687964	NM_001001414	+	1	23960	2.16577	0.147195	0.0679643
TRPV4	chr12	110271000	110271582	NM_021625	-	1	23979	0.0787554	0.0367988	0.467255
GPR124	chr8	37654048	37656100	NM_032777	+	1	24106	4.7647	5.77742	1.21254
CTPS1	chr1	41444870	41446116	NM_001905	+	1	24211	12.8371	9.34691	0.728114
PHF11	chr13	50070022	50070719	NM_001040443	+	1	24328	5.78852	5.55662	0.959938
GRM7	chr3	6902823	6903516	NM_000844	+	1	24350	0.0787554	0.0367988	0.467255
CCDC170	chr6	151814980	151815527	NM_025059	+	1	24562	0.118133	0.662379	5.60705
PDE4D	chr5	59189046	59189894	NM_001104631	-	1	25042	61.5868	25.2808	0.410491
LOC284023	chr17	7818938	7819763	NR_024349	-	1	25135	0.945065	2.39192	2.53096
MEIS2	chr15	37390175	37390380	NM_172315	-	1	25301	0.945065	1.87674	1.98583
PAX5	chr9	37034135	37038341	NM_016734	-	1	25352	6.5367	0.404787	0.0619253
NRG3	chr10	83633820	83635729	NM_001010848	+	1	25884	0.0787554	0.220793	2.80353
PRKG1-AS1	chr10	54073989	54074827	NR_038277	-	1	25892	1.26009	0.735977	0.584068
SCTR	chr2	120281661	120282211	NM_002980	-	1	26150	0.118133	0.809574	6.85307
PCSK1	chr5	95768874	95769080	NM_000439	-	1	26203	10.947	9.08931	0.830301
BNC2	chr9	16870123	16872020	NM_017637	-	1	26315	6.37919	4.26867	0.669155
APBB1IP	chr10	26727061	26727992	NM_019043	+	1	26352	3.38648	1.61915	0.478121
LBX1	chr10	102984182	102990063	NM_006562	-	1	27077	0	0	#DIV/0!
EDNRA	chr4	148402198	148402760	NM_001166055	+	1	27151	1.10258	0.846373	0.767633
RYR3	chr15	33602816	33604003	NM_001243996	+	1	27330	0.51191	0.95677	1.86902
FSD1	chr19	4304542	4305122	NM_024333	+	1	27339	0	0.0367988	#DIV/0!
TBX18	chr6	85472702	85474132	NM_001080508	-	1	27358	0.472533	0.110397	0.233627
GPRIN1	chr5	176036458	176037557	NM_052899	-	1	27613	4.4103	1.03037	0.233627
ALK	chr2	30142831	30144624	NM_004304	-	1	27784	0.0787554	0.110397	1.40176
RRAGD	chr6	90120874	90122370	NM_021244	-	1	27911	2.40204	1.65595	0.689392
ZNF879	chr5	178450630	178451216	NM_001136116	+	1	28016	0.433155	0.183994	0.424777
ANPEP	chr15	90357402	90358573	NM_001150	-	1	28092	88.0486	11.3708	0.129143
LOC613038	chr16	30216738	30217851	NR_002557	-	1	28127	3.22897	1.47195	0.455858
ANKRD34C	chr15	79574830	79575211	NM_001146341	+	1	28559	0	0	#DIV/0!
SERP2	chr13	44947371	44948443	NM_001010897	+	1	28597	0.433155	0.110397	0.254866
LRRC10B	chr11	61275825	61277329	NM_001145077	+	1	28889	0.275644	0	0
HOXB-AS1	chr17	46620367	46621373	NR_102279	+	1	29361	0.630044	0.772776	1.22654
ARNT2	chr15	80696076	80697393	NM_014862	+	1	29472	5.23724	0.515184	0.0983694
TFAP2A	chr6	10419399	10420323	NM_001042425	-	1	29473	0.157511	12.2172	77.5643
MSN	chrX	64887549	64887837	NM_002444	+	1	29503	94.1521	51.1872	0.543665
LY6E	chr8	144099456	144099731	NM_002346	+	1	29510	2.99271	2.68632	0.897621
LMNA	chr1	156051239	156051461	NR_047544	+	1	29569	84.5046	42.4291	0.502092
SLC35F4	chr14	58331676	58333121	NM_001206920	-	1	29591	0.0393777	0.0735977	1.86902
RALYL	chr8	85096759	85097247	NM_001100391	+	1	29912	0.0787554	0	0
LTF	chr3	46506161	46506416	NM_002343	-	1	30236	7.87554	0.441586	0.0560705
TMEM132C	chr12	128751041	128753151	NM_001136103	+	1	30427	0.196889	0	0
SH3RF3	chr2	109744585	109746833	NM_001099289	+	1	30720	1.69324	2.94391	1.73862
ZNF354C	chr5	178487146	178487921	NM_014594	+	1	30845	0.157511	0.110397	0.700882
BTBD11	chr12	107974842	107975305	NM_001017523	+	1	30910	0.275644	0.33119	1.20151
IRX4	chr5	1881924	1887743	NM_016358	-	1	31059	0.0787554	0	0
NPBWR1	chr8	53851701	53854426	NM_005285	+	1	31357	0	0	#DIV/0!
HSPA12A	chr10	118500868	118502706	NM_025015	-	1	31775	2.00826	2.61272	1.30098
ANKRD19P	chr9	95569429	95572255	NR_026868	+	1	32128	1.02382	0.772776	0.754796
TSPYL5	chr8	98289604	98290404	NM_033512	-	1	32156	1.29946	1.36156	1.04778
BARHL1	chr9	135455164	135458586	NM_020064	+	1	32202	0	0	#DIV/0!
DUSP9	chrX	152907595	152908323	NM_001395	+	1	32344	0	0.0735977	#DIV/0!
CRABP1	chr15	78632669	78633108	NM_004378	+	1	32878	0	0	#DIV/0!
NKD2	chr5	1008715	1010039	NM_033120	+	1	33021	0.275644	0.62558	2.26952
MIR4311	chr15	66332090	66332353	NR_036196	+	1	33061	0	0	#DIV/0!
LPL	chr8	19796843	19798006	NM_000237	+	1	33343	0.708799	0.147195	0.207669
PAK3	chrX	110339364	110339679	NM_002578	+	1	33416	0	0.110397	#DIV/0!
GAS7	chr17	10101034	10102440	NM_201433	-	1	33974	11.0651	5.96141	0.538756
PABPC1L2A	chrX	72298626	72299108	NM_001012977	-	1	34111	0	0	#DIV/0!
MIR589	chr7	5534384	5534766	NR_030318	-	1	34167	0	0	#DIV/0!
FLJ41350	chr10	102984182	102990063	NR_029380	+	1	34204	0	0	#DIV/0!
CCDC160	chrX	133371069	133371718	NM_001101357	+	1	34279	0	0	#DIV/0!
A4GALT	chr22	43116151	43117121	NM_017436	-	1	34345	1.29946	0.220793	0.169911
SCARF2	chr22	20790638	20792665	NM_182895	-	1	34357	0.433155	0.662379	1.5292
FBXL21	chr5	135265848	135266517	NM_012159	+	1	34394	0	0	#DIV/0!
HIST3H2A	chr1	228645196	228646434	NM_033445	-	1	34413	1.0632	2.06074	1.93824
KLF2	chr19	16435202	16438064	NM_016270	+	1	34478	6.33981	1.72955	0.272807
SNAR-F	chr19	51107425	51107742	NR_004384	+	1	34604	0	0	#DIV/0!
MIR4497	chr12	110271000	110271582	NR_039718	+	1	34612	0	0	#DIV/0!
PTPRN	chr2	220173870	220174283	NM_001199763	-	1	34667	0.472533	0	0
SGCZ	chr8	15094237	15095168	NM_139167	-	1	34747	0	0	#DIV/0!
KRBA1	chr7	149410858	149412351	NM_032534	+	1	34905	0.787554	0.404787	0.51398
GNAO1	chr16	56224731	56224980	NM_138736	+	1	35131	3.46524	1.76634	0.509732
SRD5A1P1	chrX	138529085	138529301	NR_028597	+	1	35384	0.236266	0.0367988	0.155752
DNAH8	chr6	38682949	38683265	NM_001206927	+	1	35388	1.10258	0.662379	0.600756
PGM5P2	chr9	69147116	69148171	NR_002836	-	1	35806	0.669421	1.32476	1.97896
TMEM101	chr17	42091712	42091948	NM_032376	-	1	35981	6.26106	9.86209	1.57515
SOX7	chr8	10587304	10591109	NM_031439	-	1	36263	1.02382	1.58235	1.54553
AKAP12	chr6	151646668	151646958	NM_144497	+	1	36428	12.7978	9.6045	0.750483
IGF1R	chr15	99190446	99194559	NM_000875	+	1	36721	57.6884	72.4201	1.25537
TMSB15B	chrX	103217140	103217713	NM_194324	+	1	36854	0.118133	0	0
RIMBP3	chr22	20459267	20461473	NM_015672	-	1	36924	0.590666	1.21436	2.05592
DIRAS2	chr9	93404976	93405313	NM_017594	-	1	37223	0.157511	0.0735977	0.467255
FAM184B	chr4	17782642	17783624	NM_015688	-	1	37495	1.0632	2.17113	2.04208
SLC46A2	chr9	115652446	115653448	NM_033051	-	1	37496	0.0787554	0.147195	1.86902
MEX3A	chr1	156051239	156051461	NM_001093725	-	1	37684	1.14195	2.02394	1.77234
MAGEE1	chrX	75648708	75649533	NM_020932	+	1	37814	0.393777	0	0
DKK1	chr10	54073989	54074827	NM_012242	+	1	37990	0.118133	0	0
ALG10B	chr12	38710392	38710643	NM_001013620	+	1	38137	4.13466	3.67988	0.890009
SLFN12L	chr17	33814234	33814947	NM_001195790	-	1	38500	1.22071	0.257592	0.211018
ITGA9	chr3	37493418	37494538	NM_002207	+	1	38773	3.50462	4.63665	1.32301
IQSEC1	chr3	13114627	13115245	NM_001134382	-	1	38793	17.8775	34.9957	1.95753
TSPY26P	chr20	30777756	30778329	NR_002781	-	1	38816	0.0393777	0.257592	6.54156
COL7A1	chr3	48631882	48632901	NM_000094	-	1	39108	0.945065	1.32476	1.40176
MIR4285	chr7	101936317	101936548	NR_036245	+	1	39147	0	0	#DIV/0!
EGFEM1P	chr3	167967246	167968130	NR_021485	+	1	39171	0	0	#DIV/0!
C20orf166	chr20	61147457	61147787	NM_178463	+	1	39343	0	0	#DIV/0!
DPYS	chr8	105478672	105479340	NM_001385	-	1	39444	0	0	#DIV/0!
NGF	chr1	115880167	115881332	NM_002506	-	1	39925	0	0.147195	#DIV/0!
KLHL1	chr13	70681732	70682219	NM_020866	-	1	39944	0	0	#DIV/0!
VIPR2	chr7	158936507	158938492	NM_003382	-	1	40036	0.157511	0.220793	1.40176
KLHL34	chrX	21674018	21677066	NM_153270	-	1	40052	0.630044	0.0735977	0.116814
MIR935	chr19	54485303	54486322	NR_030632	+	1	40185	0	0	#DIV/0!
LRRK2	chr12	40618355	40618913	NM_198578	+	1	40485	4.05591	1.83994	0.453645
BHLHE23	chr20	61636171	61639055	NM_080606	-	1	40951	0	0	#DIV/0!
IGFBP7	chr4	57975860	57976916	NM_001553	-	1	506	34.8099	53.5423	1.53813
NKX2-1	chr14	36986362	36990576	NM_003317	-	1	2207	0	1.17756	#DIV/0!
TK2	chr16	66583236	66584135	NM_001272050	-	1	2535	6.61546	12.438	1.88014
EGFL7	chr9	139559804	139561005	NM_201446	+	1	2856	1.22071	1.72955	1.41684
FGF8	chr10	103535636	103536505	NM_033165	-	1	3925	0	0	#DIV/0!
ZNF512B	chr20	62600653	62601676	NM_020713	-	1	4291	0.630044	0.367988	0.584068
SPOCK1	chr5	136834016	136835146	NM_004598	-	1	5033	2.24453	0.367988	0.163949
HSD17B7	chr1	162760250	162760722	NM_016371	+	1	5843	7.12737	5.15184	0.722825
LINC00535	chr8	94712366	94713345	NR_033858	-	1	5882	0.0393777	0	0
PCDH7	chr4	30721204	30724842	NM_032456	+	1	6152	3.03208	3.56949	1.17724
ADCYAP1R1	chr7	31091717	31093077	NM_001199635	+	1	7241	0.118133	0.147195	1.24601
LINC00473	chr6	166401526	166402659	NR_026860	-	1	7699	0	0.0735977	#DIV/0!
PRR16	chr5	119799821	119800148	NM_016644	+	1	8145	1.92951	1.61915	0.839151
COL6A2	chr21	47517651	47518999	NM_001849	+	1	8218	35.9912	22.1529	0.615508
SPDYA	chr2	29033351	29034011	NM_001142634	+	1	9326	0.354399	1.58235	4.46488
IGF2-AS	chr11	2158951	2162484	NR_028044	+	1	10518	0	0	#DIV/0!
SLC25A21	chr14	37641232	37641879	NM_030631	-	1	10783	0.433155	0.62558	1.44424
HOMER2	chr15	83620950	83621727	NM_004839	-	1	10936	0.433155	0	0
ANKRD36BP2	chr2	89064493	89065513	NR_015424	+	1	11111	1.26009	0.846373	0.671678
PLEKHO1	chr1	150121695	150123078	NM_016274	+	1	11169	7.83617	3.45909	0.441426
LOC255130	chr4	57975860	57976916	NR_034081	+	1	11688	1.73262	1.87674	1.08318
BACH1	chr21	30670744	30671786	NM_001186	+	1	12367	44.0243	46.6609	1.05989
C16orf72	chr16	9184146	9186689	NM_014117	+	1	13288	42.0948	27.4151	0.651272
GATA5	chr20	61049361	61051897	NM_080473	-	1	13535	0	0	#DIV/0!
KCNT1	chr9	138593527	138594253	NM_020822	+	1	14077	0	0	#DIV/0!
LOC100129794	chr14	37641232	37641879	NR_033240	+	1	15048	1.29946	0.147195	0.113274
LOC729506	chr5	8457432	8458273	NR_039984	-	1	15346	0.0393777	0	0
IGF2	chr11	2158951	2162484	NM_000612	-	1	17466	6.96986	5.77742	0.828915
HRH2	chr5	175085004	175085756	NM_001131055	+	1	18078	0	0.147195	#DIV/0!
LOC730091	chr3	156533839	156535131	NR_038387	-	1	18623	0.433155	0.257592	0.594688
FAM92A1	chr8	94712366	94713345	NM_145269	+	1	18656	0.472533	0.699178	1.47964
PRDM14	chr8	70981873	70984888	NM_024504	-	1	18897	0	0	#DIV/0!
LPPR3	chr19	821345	822669	NM_001270366	-	1	20675	0	0	#DIV/0!
ITGB3	chr17	45330928	45331766	NM_000212	+	1	21619	3.50462	3.82708	1.09201
USP2	chr11	119234480	119235214	NM_171997	-	1	21680	2.24453	0.0735977	0.0327898
TMEM132D	chr12	130387609	130389139	NM_133448	-	1	22427	0.236266	0.147195	0.623006
FOXD4	chr9	116701	118177	NM_207305	-	1	22993	0.0787554	0.294391	3.73804
LOC100505738	chr5	8457432	8458273	NR_039989	+	1	23291	3.30773	0.220793	0.0667507
SORCS2	chr4	7194537	7195467	NM_020777	+	1	23857	0.354399	0.220793	0.623006
HS3ST3A1	chr17	13503829	13505559	NM_006042	-	1	23965	1.0632	1.61915	1.5229
ANKRD18DP	chr3	197807029	197808734	NR_003291	-	1	25011	0	0	#DIV/0!
LOC729732	chr8	12522621	12523226	NR_047662	-	1	25019	3.97715	9.5309	2.39641
SH2D5	chr1	21058006	21059366	NM_001103160	-	1	25872	0	0	#DIV/0!
THBD	chr20	23028403	23032218	NM_000361	-	1	26374	9.45065	5.00464	0.529555
GNG7	chr19	2702532	2702987	NM_052847	-	1	27239	3.70151	2.53912	0.685969
DRD1	chr5	174870753	174872345	NM_000794	-	1	27533	0	0.62558	#DIV/0!
ACAN	chr15	89346043	89347203	NM_001135	+	1	29273	0.0393777	0.220793	5.60705
STK32A	chr5	146614283	146614560	NM_001112724	+	1	29604	0	0	#DIV/0!
TRH	chr3	129693127	129694841	NM_007117	+	1	30963	0	0	#DIV/0!
TLX3	chr5	170735169	170739863	NM_021025	+	1	31861	0	0	#DIV/0!
PPP2R2C	chr4	6564751	6565185	NM_001206994	-	1	32559	0.0393777	0	0
CCDC37	chr3	126113547	126113967	NM_182628	+	1	35412	0.0393777	0.183994	4.67255
RBPMS2	chr15	65066916	65068352	NM_194272	-	1	36837	1.61449	0.662379	0.410272
LINC00602	chr6	166401526	166402659	NR_027284	+	1	37020	0	0	#DIV/0!
ITGA11	chr15	68723367	68724691	NM_001004439	-	1	37431	1.10258	2.75991	2.50315
LRRC2	chr3	46607346	46607806	NM_024512	-	1	37489	0.708799	3.71668	5.24363
GLP1R	chr6	39016307	39016998	NM_002062	+	1	37831	0	0	#DIV/0!
SLC24A3	chr20	19192459	19193902	NM_020689	+	1	38367	5.98541	3.82708	0.639401
C1QTNF4	chr11	47615710	47616055	NM_031909	-	1	39710	0	0	#DIV/0!
MAP3K10	chr19	40696811	40698193	NM_002446	+	1	40544	0.51191	0.809574	1.58148
SCGB3A1	chr5	180017099	180019062	NM_052863	-	1	40688	0	0	#DIV/0!
MPV17L	chr16	15489526	15490075	NM_173803	+	1	5	6.61546	1.28796	0.194689
PRDM16	chr1	2983925	2987962	NM_022114	+	1	25	0.86631	0.220793	0.254866
PLSCR3	chr17	7296504	7298466	NM_020360	-	1	127	4.09528	6.77099	1.65336
KCP	chr7	128550409	128550903	NM_001135914	-	1	519	0.354399	0.183994	0.519172
FENDRR	chr16	86541430	86545228	NR_036444	-	1	585	3.66213	4.41586	1.20582
TRABD	chr22	50623164	50625226	NM_025204	+	1	634	25.5168	20.9017	0.819138
SLX1A	chr16	29465353	29467143	NM_001015000	+	1	743	13.7822	8.16934	0.592746
PRNP	chr20	4666827	4667874	NM_183079	+	1	752	18.7832	8.09574	0.431011
MLLT10	chr10	21822850	21824410	NM_001195626	+	1	1030	16.3024	30.2486	1.85547
TMEM88B	chr1	1361560	1361787	NM_001146685	+	1	1088	0	0	#DIV/0!
RASSF1	chr3	50377803	50378540	NM_007182	-	1	1121	9.17501	6.3662	0.693863
JARID2	chr6	15244877	15246160	NM_004973	+	1	1178	15.2786	22.1161	1.44753
SMOC2	chr6	168841438	168841699	NM_001166412	+	1	1768	5.4735	1.39836	0.255477
RNF182	chr6	13925099	13925510	NM_001165032	+	1	2054	0.0787554	0.0735977	0.934509
ZNF71	chr19	57106575	57106896	NM_021216	+	1	2243	1.10258	0.809574	0.734257
XKR4	chr8	56013656	56015761	NM_052898	+	1	2350	0.826932	0.183994	0.222502
TSPAN11	chr12	31079243	31079878	NM_001080509	+	1	2357	7.9543	5.63022	0.707821
TNFRSF25	chr1	6525996	6526228	NM_148966	-	1	2588	4.80408	6.03501	1.25623
LRSAM1	chr9	130213143	130214335	NM_001005373	+	1	2762	3.62275	5.26223	1.45255
RUSC2	chr9	35489704	35490700	NM_014806	+	1	2946	3.58337	2.87031	0.801008
LOC729683	chr17	61776890	61778733	NR_046273	+	1	3119	0.630044	0.147195	0.233627
PTPRG	chr3	61546328	61549669	NM_002841	+	1	3195	24.2961	25.8696	1.06476
KLK13	chr19	51568154	51568412	NM_015596	-	1	3265	0.118133	0	0
FTH1P3	chr2	27616205	27616440	NR_002201	-	1	3551	9.68692	5.70382	0.588817
STX16	chr20	57224695	57226322	NR_037942	+	1	3590	33.7467	35.5845	1.05446
SUPT4H1	chr17	56429455	56429906	NR_073470	-	1	3695	21.6184	22.0793	1.02132
EGR3	chr8	22547486	22553427	NM_004430	-	1	3844	3.03208	0.883172	0.291276
MYEF2	chr15	48470007	48470628	NM_016132	-	1	3890	3.70151	0.588781	0.159065
HBZ	chr16	203753	204866	NM_005332	+	1	3967	0	0	#DIV/0!
SPOCK2	chr10	73846806	73848233	NM_001134434	-	1	4006	0.196889	0.220793	1.12141
FLJ42875	chr1	2983925	2987962	NR_015440	-	1	4111	0	0.0367988	#DIV/0!
SHC4	chr15	49254984	49255564	NM_203349	-	1	4241	0.0787554	0	0
PRRT3	chr3	9993730	9994136	NM_207351	-	1	4276	0.51191	1.76634	3.4505
COX4I2	chr20	30225572	30225852	NM_032609	+	1	4384	0.236266	0	0
MIPOL1	chr14	37666686	37667493	NM_001195297	+	1	4385	3.81964	4.19507	1.09829
ELOVL2-AS1	chr6	11043913	11045206	NR_038962	+	1	4396	0	0	#DIV/0!
CTNNA2	chr2	79739696	79740243	NM_004389	+	1	4410	0	0	#DIV/0!
SLC4A8	chr12	51818460	51819166	NM_001039960	+	1	4552	0.748177	3.3119	4.42662
ARHGEF10	chr8	1771361	1772760	NM_014629	+	1	4817	7.28488	8.09574	1.11131
C9orf66	chr9	214586	215431	NM_152569	-	1	4825	0.826932	0.699178	0.845508
MYCN	chr2	16079801	16083032	NM_005378	+	1	4916	0.393777	0.809574	2.05592
ALDH1L2	chr12	105478089	105478517	NR_027752	-	1	4933	2.1264	3.34869	1.57482
KCNA7	chr19	49575129	49576076	NM_031886	-	1	4946	0	0	#DIV/0!
PGM5	chr9	70971549	70972604	NM_021965	+	1	4972	3.30773	2.17113	0.656381
SLX1B-SULT1A4	chr16	29465353	29467143	NR_037609	+	1	5054	81.7481	46.2561	0.565837
FAM211A	chr17	16394833	16395843	NM_001113567	-	1	5215	30.8721	26.4584	0.857031
LOC100132111	chr1	151810460	151811684	NR_024237	+	1	5276	0.236266	0.515184	2.18052
FZD8	chr10	35928501	35931893	NM_031866	-	1	5683	2.8352	3.0543	1.07728
CASR	chr3	121902742	121903645	NM_000388	+	1	5746	0.51191	0	0
FAM153C	chr5	177433281	177434067	NR_038353	+	1	5795	0	0	#DIV/0!
CLIC6	chr21	36041305	36043224	NM_053277	+	1	5901	18.4682	1.03037	0.0557916
LRRC38	chr1	13839505	13840613	NM_001010847	-	1	5929	0	0	#DIV/0!
ZFP69B	chr1	40915605	40916072	NM_023070	+	1	6376	1.10258	0.662379	0.600756
CHL1	chr3	238391	240140	NM_001253387	+	1	6484	5.43413	5.55662	1.02254
NMUR1	chr2	232394763	232395337	NM_006056	-	1	6521	0.590666	0.515184	0.872209
SLC13A5	chr17	6616422	6617471	NM_001143838	-	1	6893	0.0393777	0.0367988	0.934509
KDM2B	chr12	122016170	122017693	NM_001005366	-	1	7137	10.9076	10.5245	0.964872
CPNE4	chr3	131753880	131754139	NM_130808	-	1	7336	0.354399	0.0367988	0.103834
ZIC1	chr3	147126988	147128999	NM_003412	+	1	7660	0	0	#DIV/0!
NFATC4	chr14	24838768	24838994	NM_001198966	+	1	7681	2.08702	4.04787	1.93955
SNX9	chr6	158243601	158245035	NM_016224	+	1	7845	99.7044	56.0814	0.562477
CLEC2L	chr7	139208442	139209069	NM_001080511	+	1	7927	0	0	#DIV/0!
BOLA2	chr16	29465353	29467143	NM_001031827	-	1	7975	36.1881	22.9993	0.635548
SBK1	chr16	28303973	28304770	NM_001024401	+	1	8029	1.61449	0.62558	0.387479
FBXO39	chr17	6679205	6679710	NM_153230	+	1	8039	0	0.220793	#DIV/0!
LDHB	chr12	21810488	21810766	NM_001174097	-	1	8446	96.5542	32.4198	0.335768
MMP23A	chr1	1564421	1570006	NR_002946	+	1	8492	0.393777	1.28796	3.27078
MCOLN3	chr1	85513509	85514555	NM_001253693	-	1	8673	0.118133	0.110397	0.934509
MARK1	chr1	220701507	220702348	NM_018650	+	1	8861	1.61449	0.257592	0.15955
STL	chr6	125283124	125284389	NR_026876	-	1	9323	0.196889	0.110397	0.560705
WNT10A	chr2	219744986	219745780	NM_025216	+	1	9336	0.354399	0.183994	0.519172
MANEAL	chr1	38259095	38260427	NM_001113482	+	1	9345	6.06417	15.0139	2.47584
SHE	chr1	154474107	154475699	NM_001010846	-	1	9372	2.71706	2.20793	0.812617
PDE10A	chr6	166073882	166077752	NM_001130690	-	1	9600	0.275644	0.441586	1.60202
MYCNOS	chr2	16079801	16083032	NR_026766	-	1	9671	0	0	#DIV/0!
ALS2CR8	chr2	203776859	203777522	NM_024744	+	1	9810	3.46524	8.02215	2.31503
IRX2	chr5	2748368	2757024	NM_033267	-	1	9820	3.11084	0.0735977	0.0236585
CMTM7	chr3	32433104	32434162	NM_181472	+	1	9881	5.94604	2.79671	0.470349
TMEM17	chr2	62732758	62733497	NM_198276	-	1	9902	0.118133	0.478385	4.04954
CALCB	chr11	15094957	15095872	NM_000728	+	1	9945	0	0	#DIV/0!
GUCY2D	chr17	7905927	7907445	NM_000180	+	1	10244	0	0	#DIV/0!
ARSG	chr17	66286541	66288532	NM_001267727	+	1	10424	0.669421	0.772776	1.15439
CPLX2	chr5	175223609	175224679	NM_006650	+	1	10445	0.590666	0.183994	0.311503
TEAD3	chr6	35464056	35466269	NM_003214	-	1	10516	18.6257	13.91	0.746817
DGKQ	chr4	966732	968137	NM_001347	-	1	10636	16.4205	16.8539	1.02639
KCNIP2	chr10	103603166	103603642	NM_173193	-	1	10663	0.590666	0.993569	1.68212
NBEAP1	chr15	20960779	20961647	NR_027992	-	1	10848	0	0.0735977	#DIV/0!
HTR6	chr1	19991146	19992788	NM_000871	+	1	10850	0	0.0735977	#DIV/0!
TCEA1	chr8	54934665	54935160	NM_201437	-	1	10903	19.2951	25.3544	1.31403
OXTR	chr3	8808961	8811280	NM_000916	-	1	10915	0	0.110397	#DIV/0!
TWIST2	chr2	239755096	239758310	NM_057179	+	1	10948	0.157511	0	0
ADAM19	chr5	157002174	157003182	NM_033274	-	1	10967	12.3646	5.74062	0.464278
SDR42E1	chr16	82044886	82045306	NM_145168	-	1	10969	8.70248	0.809574	0.0930281
PROM1	chr4	16084195	16085735	NM_001145847	-	1	11005	8.89936	7.76456	0.872484
ANHX	chr12	133812403	133813102	NM_001191054	-	1	11184	0	0	#DIV/0!
TVP23A	chr16	10912159	10912719	NM_001079512	-	1	11823	3.46524	3.75348	1.08318
BSCL2	chr11	62476770	62477481	NR_037949	-	1	11846	28.9426	14.7195	0.508576
RPL12	chr9	130213143	130214335	NM_000976	-	1	11906	10.5532	16.9275	1.60401
CA10	chr17	50235175	50236466	NM_020178	-	1	12131	0.236266	0.147195	0.623006
PDZRN3	chr3	73673230	73674375	NM_015009	-	1	12257	7.44239	8.97892	1.20646
SLC16A6	chr17	66286541	66288532	NM_001174166	-	1	12459	0.708799	0.551983	0.778758
MLNR	chr13	49794125	49795542	NM_001507	+	1	12547	0	0	#DIV/0!
SCN3B	chr11	123524733	123525685	NM_001040151	-	1	12607	0.551288	0.33119	0.600756
CTSL2	chr9	99800856	99801724	NM_001333	-	1	12644	7.87554	4.63665	0.588741
NBPF3	chr1	21766272	21767224	NM_001256417	+	1	12885	1.33884	2.50232	1.86902
PCDH8	chr13	53419897	53422872	NM_002590	-	1	12896	0.0787554	0	0
PET117	chr20	18117962	18118989	NM_001164811	+	1	12950	19.807	18.2154	0.919646
ADRA1D	chr20	4228532	4230496	NM_000678	-	1	13547	0	0	#DIV/0!
HHIPL1	chr14	100111120	100111906	NM_032425	+	1	13590	0.236266	0.147195	0.623006
PIWIL1	chr12	130822360	130822696	NM_004764	+	1	13647	0.0787554	0	0
CCNA1	chr13	37005581	37006453	NM_001111045	+	1	13751	0	0	#DIV/0!
LOC100287834	chr7	62858468	62858826	NR_028349	-	1	13806	0	0	#DIV/0!
LINC00577	chr6	105388190	105389545	NR_046407	-	1	13887	0	0	#DIV/0!
AOX1	chr2	201450526	201451027	NM_001159	+	1	13934	0.51191	0.772776	1.50959
KCNG3	chr2	42719784	42722166	NM_172344	-	1	14084	0.354399	0.294391	0.830675
NKX6-2	chr10	134597357	134602649	NM_177400	-	1	14125	0	0	#DIV/0!
NOP14-AS1	chr4	2935461	2936974	NR_015453	+	1	14396	7.00923	5.96141	0.850508
MARVELD2	chr5	68710807	68711520	NM_001244734	+	1	14522	31.069	37.4244	1.20456
SLC6A11	chr3	10857687	10858447	NM_014229	+	1	14650	0	0	#DIV/0!
C5orf38	chr5	2748368	2757024	NM_178569	+	1	14690	0.0787554	0	0
CNTFR	chr9	34589113	34591978	NM_001207011	-	1	14692	1.10258	0.110397	0.100126
DDX25	chr11	125774292	125774584	NM_013264	+	1	14703	0	0	#DIV/0!
RNF212	chr4	1107125	1107728	NM_001193318	-	1	14941	0.118133	0	0
GJB6	chr13	20806016	20806867	NM_001110221	-	1	15149	0	0	#DIV/0!
TMEM64	chr8	91657389	91658779	NM_001146273	-	1	15189	4.96159	2.02394	0.407921
CCT6B	chr17	33288174	33288913	NM_001193530	-	1	15314	0.275644	0.919971	3.33753
TRIM46	chr1	155147185	155147444	NR_046329	+	1	15350	0.86631	0.220793	0.254866
CAMSAP1	chr9	138798462	138800325	NM_015447	-	1	15561	9.68692	17.1483	1.77025
FOXD4L2	chr9	70427403	70428878	NM_001099279	-	1	15942	0.472533	1.54555	3.27078
FAM115A	chr7	143582125	143582610	NM_001206941	-	1	16369	53.1993	81.4726	1.53146
TLK2	chr17	60555507	60557168	NM_006852	+	1	16411	14.9635	14.9403	0.998449
LOC100130539	chr10	44788811	44789120	NM_001258000	+	1	16565	0	0	#DIV/0!
EVA1A	chr2	75787129	75787420	NM_001135032	-	1	16732	0.118133	0.0735977	0.623006
GRID2IP	chr7	6590563	6590957	NM_001145118	-	1	16755	0.157511	0.147195	0.934509
NPTXR	chr22	39239168	39240425	NM_014293	-	1	16852	1.0632	0.441586	0.415337
KRT81	chr12	52684945	52685222	NM_002281	-	1	17127	0	0.0735977	#DIV/0!
GPNMB	chr7	23287221	23287508	NM_002510	+	1	17159	35.755	13.0636	0.365364
MMP23B	chr1	1564421	1570006	NM_006983	+	1	17190	0.196889	0.772776	3.92494
MAP1LC3A	chr20	33146135	33147318	NM_032514	+	1	17319	2.4808	3.0175	1.21635
SIPA1	chr11	65408344	65408631	NM_153253	+	1	17721	7.48177	8.68453	1.16076
GALNTL6	chr4	172733734	172735118	NM_001034845	+	1	18072	0.118133	0.0735977	0.623006
CENPB	chr20	3766343	3767636	NM_001810	-	1	18184	11.7739	9.6781	0.821993
FAM46B	chr1	27338879	27339441	NM_052943	-	1	18496	0.433155	0.0735977	0.169911
MYPOP	chr19	46404537	46406545	NM_001012643	-	1	18755	0.984443	1.17756	1.19617
KIAA1462	chr10	30347599	30348416	NM_020848	-	1	18770	3.11084	3.3119	1.06463
NEFH	chr22	29875919	29877242	NM_021076	+	1	19037	0.196889	0.110397	0.560705
TDRD10	chr1	154474107	154475699	NM_001098475	+	1	19193	0	0.0735977	#DIV/0!
ZNF318	chr6	43336480	43337832	NM_014345	-	1	19412	26.1074	46.1089	1.76612
NPTX2	chr7	98245805	98247759	NM_002523	+	1	19513	0.236266	0	0
C1orf65	chr1	223566642	223567268	NM_152610	+	1	19517	0	0	#DIV/0!
NSD1	chr5	176558852	176561652	NM_022455	+	1	19702	72.6913	114.003	1.56831
MSANTD1	chr4	3250627	3251447	NM_001042690	+	1	19800	0.0393777	0	0
GBGT1	chr9	136038416	136039577	NM_021996	-	1	20542	1.14195	0.515184	0.451142
S1PR4	chr19	3178741	3179986	NM_003775	+	1	20582	0.945065	0.0735977	0.0778758
PTGER4P2-CDK2AP2P2	chr9	66493170	66494106	NR_024496	+	1	20626	0	0.0735977	#DIV/0!
TNNI3	chr19	55667532	55668465	NM_000363	-	1	20776	0	0	#DIV/0!
CNTLN	chr9	17134821	17135706	NM_001114395	+	1	20882	2.00826	0.95677	0.476416
ALS2CL	chr3	46734731	46735717	NM_001190707	-	1	21001	15.7905	13.2476	0.838961
DEF8	chr16	90015551	90016120	NM_001242819	+	1	21786	5.07973	3.34869	0.659227
FGFR3	chr4	1794442	1797132	NM_001163213	+	1	22040	12.0496	8.31654	0.690193
AGO1	chr1	36348501	36349731	NM_012199	+	1	22173	38.0389	54.0207	1.42014
CCDC154	chr16	1493499	1493773	NM_001143980	-	1	22315	0.118133	0.110397	0.934509
NMNAT2	chr1	183386000	183387664	NM_015039	-	1	22365	0.945065	0.809574	0.856633
TERF2	chr16	69419316	69420086	NM_005652	-	1	22522	18.2319	25.3544	1.39066
MESDC1	chr15	81292793	81295609	NM_022566	+	1	22624	17.6806	9.75169	0.551548
CYYR1	chr21	27945010	27945646	NM_052954	-	1	22649	1.37822	3.0175	2.18942
WDR12	chr2	203776859	203777522	NM_018256	-	1	23283	11.8921	16.1547	1.35844
SEC31B	chr10	102279162	102279730	NM_015490	-	1	23612	4.37093	6.2926	1.43965
ZNF446	chr19	58986853	58988049	NM_017908	+	1	23905	2.8352	3.0175	1.0643
C1orf94	chr1	34642382	34643024	NM_001134734	+	1	23917	0	0	#DIV/0!
L3MBTL1	chr20	42143210	42143591	NM_015478	+	1	23948	0.905688	1.72955	1.90965
HIST1H1B	chr6	27835190	27835461	NM_005322	-	1	23990	16.9718	2.31833	0.136599
TTC40	chr10	134755663	134756852	NM_001200049	-	1	24090	0	0.0367988	#DIV/0!
DOCK8	chr9	214586	215431	NM_203447	+	1	24409	22.209	8.27974	0.37281
MDGA2	chr14	48143433	48145589	NM_001113498	-	1	24593	0	0	#DIV/0!
SEH1L	chr18	12947924	12948654	NM_001013437	+	1	24694	22.3665	25.5752	1.14346
ELOVL2	chr6	11043913	11045206	NM_017770	-	1	24704	0.275644	0.0735977	0.267003
SOX17	chr8	55370170	55372525	NM_022454	+	1	25140	0.354399	0.257592	0.72684
ACN9	chr7	96746767	96747190	NM_020186	+	1	25161	8.78123	4.04787	0.460969
MIR4683	chr10	35928501	35931893	NR_039831	-	1	25186	0	0	#DIV/0!
GATM	chr15	45669970	45671029	NM_001482	-	1	25937	6.96986	12.5852	1.80566
GRIA2	chr4	158141404	158141836	NM_001083620	+	1	25954	0	0	#DIV/0!
VILL	chr3	38035701	38036000	NM_015873	+	1	26045	35.4793	18.7306	0.52793
SLX1A-SULT1A3	chr16	29465353	29467143	NR_037608	+	1	26515	81.7481	46.2561	0.565837
PHGDH	chr1	120254844	120255499	NM_006623	+	1	26570	2.28391	0.846373	0.370581
CALY	chr10	135148196	135150565	NM_015722	-	1	26801	0	0	#DIV/0!
NMRK2	chr19	3933473	3933816	NM_170678	+	1	27076	0	0	#DIV/0!
OXCT2	chr1	40235767	40237190	NM_022120	-	1	27187	0.905688	0.772776	0.853247
MSX2	chr5	174151478	174152364	NM_002449	+	1	27313	0.118133	0.0367988	0.311503
SLC6A3	chr5	1444678	1446648	NM_001044	-	1	28076	0	0	#DIV/0!
ZAR1	chr4	48492117	48493589	NM_175619	+	1	28319	0	0	#DIV/0!
RBX1	chr22	41346636	41347759	NM_014248	+	1	28476	14.8848	14.4987	0.974065
ZNF354B	chr5	178286874	178287942	NM_058230	+	1	28547	1.772	2.17113	1.22525
SLX1B	chr16	29465353	29467143	NM_024044	+	1	28648	24.2961	14.9403	0.614928
LOC400456	chr15	95869955	95870322	NR_034095	-	1	28845	0	0	#DIV/0!
STX16-NPEPL1	chr20	57224695	57226322	NR_037945	+	1	29138	15.5542	15.9707	1.02678
LIMS2	chr2	128421719	128422182	NM_017980	-	1	29459	3.34711	2.09753	0.626671
HSD17B7P2	chr10	38645112	38645513	NR_003086	+	1	29685	1.49635	0.367988	0.245923
NFE2L1	chr17	46125046	46126233	NM_003204	+	1	29767	134.79	93.2851	0.692077
NPY4R	chr10	47083341	47083633	NM_005972	+	1	29834	12.1283	13.358	1.10139
RGPD8	chr2	113190115	113191274	NM_001164463	-	1	29888	50.9548	60.2029	1.1815
ALPK3	chr15	85360192	85360574	NM_020778	+	1	30011	3.07146	0.95677	0.311503
SH2D3C	chr9	130516407	130517849	NM_001142533	-	1	30091	3.38648	2.68632	0.793246
GPR83	chr11	94134226	94134848	NM_016540	-	1	30242	0.196889	0.110397	0.560705
SNAP25-AS1	chr20	10200088	10200384	NR_040710	-	1	30279	0	0	#DIV/0!
DGAT2	chr11	75479462	75480172	NM_001253891	+	1	30417	2.00826	4.52626	2.25382
B3GNT4	chr12	122687800	122689106	NM_030765	+	1	31204	0	0.220793	#DIV/0!
INA	chr10	105036628	105038084	NM_032727	+	1	31646	0.0787554	0.220793	2.80353
TPTEP1	chr22	17081936	17082595	NR_001591	+	1	31831	0	0.0735977	#DIV/0!
SH3BP5	chr3	15373314	15374209	NM_004844	-	1	31923	13.1915	7.54376	0.571864
ACTL6B	chr7	100253782	100254150	NM_016188	-	1	32143	0	0	#DIV/0!
BOLA1	chr1	149871079	149871946	NM_016074	+	1	32186	3.93777	4.19507	1.06534
SCUBE3	chr6	35181095	35182547	NM_152753	+	1	32325	1.22071	1.65595	1.35655
AGAP2	chr12	58130870	58132047	NM_001122772	-	1	32345	5.35537	5.85102	1.09255
KANK2	chr19	11307495	11308276	NM_001136191	-	1	32621	21.2246	19.2458	0.906769
ZNF830	chr17	33288174	33288913	NM_052857	+	1	32748	6.57608	6.4766	0.984872
ZSCAN1	chr19	58545115	58545897	NM_182572	+	1	33131	0	0	#DIV/0!
FOXD4L4	chr9	70427403	70428878	NM_199244	-	1	33651	0.472533	1.54555	3.27078
SALL4	chr20	50417312	50419045	NM_020436	-	1	33827	0.196889	0.735977	3.73804
GCSH	chr16	81129361	81130218	NR_033249	-	1	34199	2.32329	2.17113	0.934509
RGPD3	chr2	107082328	107084936	NM_001144013	-	1	34685	9.92319	12.6956	1.27939
LINGO3	chr19	2307566	2308092	NM_001101391	-	1	34985	0.0787554	0	0
LIMD2	chr17	61776890	61778733	NM_030576	-	1	35514	10.0019	3.67988	0.367917
C1QL1	chr17	43044369	43046424	NM_006688	-	1	36011	0.157511	0.110397	0.700882
LOC283214	chr11	75479462	75480172	NR_046090	-	1	36301	0	0	#DIV/0!
ZNF496	chr1	247494249	247495840	NM_032752	-	1	36983	1.92951	2.98071	1.5448
FSTL1	chr3	120169202	120170519	NM_007085	-	1	37053	23.5479	19.3194	0.82043
NDST3	chr4	118954410	118955207	NM_004784	+	1	37169	0.354399	0.0367988	0.103834
PGM5-AS1	chr9	70971549	70972604	NR_015423	-	1	37333	0	0.110397	#DIV/0!
CHST2	chr3	142837885	142840838	NM_004267	+	1	37350	2.32329	1.95034	0.839474
MFSD10	chr4	2935461	2936974	NM_001120	-	1	37442	10.3563	11.1132	1.07309
SBK2	chr19	56047403	56047668	NM_001101401	-	1	37448	0	0	#DIV/0!
CA8	chr8	61193312	61194195	NM_004056	-	1	37663	6.93048	11.8124	1.70442
ADAMTS18	chr16	77468309	77469074	NM_199355	-	1	37995	0	0.0367988	#DIV/0!
GATM-AS1	chr15	45669970	45671029	NR_033252	+	1	38523	0	0.294391	#DIV/0!
DPYSL4	chr10	133998912	134001500	NM_006426	+	1	38605	0.118133	0.0367988	0.311503
AIRE	chr21	45705428	45706044	NM_000383	+	1	38649	0.0393777	0.0367988	0.934509
MAP6D1	chr3	183542496	183543804	NM_024871	-	1	39009	1.02382	0.919971	0.898566
ZYG11A	chr1	53308294	53309262	NM_001004339	+	1	39365	0.354399	0.0367988	0.103834
FGF19	chr11	69517840	69519929	NM_005117	-	1	39460	0	0	#DIV/0!
FOXF1	chr16	86541430	86545228	NM_001451	+	1	39729	2.63831	4.08467	1.54822
PXDC1	chr6	3750788	3752767	NM_183373	-	1	40057	0.669421	2.50232	3.73804
GCGR	chr17	79761267	79762807	NM_000160	+	1	40364	0	0	#DIV/0!
SLC16A8	chr22	38476836	38478839	NM_013356	-	1	40471	0.354399	0.257592	0.72684
HOXD9	chr2	176986424	176988291	NM_014213	+	1	40525	3.42586	2.31833	0.676714
AQP4	chr18	24443200	24443458	NM_004028	-	1	40615	0	0	#DIV/0!
CACNG8	chr19	54466357	54466725	NM_031895	+	1	40659	0	0	#DIV/0!
AQPEP	chr5	115297607	115298093	NM_173800	+	1	40853	0.0393777	0.0367988	0.934509
VENTX	chr10	135048797	135052077	NM_014468	+	1	41057	0.315022	0.147195	0.467255

## Sheet: 3_IIa EpiG. inactivated genes
Total number of genes hypermethylated in LST #3	1051
Hypermethylated in LST #3 but silent in normal	230
Epigenetically inactivated in LST #3	340
Symbol	Chr	Start	End	Gene ID	Strand	CpG	Pos	3_N_Xprn	3_IIa_Xprn	3_IIa_FC
WNT3A	chr1	228194096	228196512	NM_033131	+	1	2669	0	0	#DIV/0!
ZSCAN18	chr19	58609338	58609988	NM_023926	-	1	7127	6.00882	2.96683	0.493746
PPP1R16B	chr20	37434206	37435592	NM_001172735	+	1	7347	4.36257	2.62884	0.602589
MYH10	chr17	8533004	8534933	NM_005964	-	1	8729	8.35473	2.02796	0.242732
ADARB2	chr10	1778784	1780018	NM_018702	-	1	10524	0.0823126	0.0751097	0.912493
GRIN2C	chr17	72855621	72858012	NM_000835	-	1	17310	0.0823126	0	0
AKR1B1	chr7	134143115	134144063	NM_001628	-	1	17430	7.61392	3.53015	0.463645
OLIG1	chr21	34442206	34444543	NM_138983	+	1	29187	0	0	#DIV/0!
ZNF568	chr19	37406931	37407463	NM_001204837	+	1	31	1.02891	0.150219	0.145999
ELMOD1	chr11	107461743	107462648	NM_001130037	+	1	4313	0	0	#DIV/0!
PCDHGC3	chr5	140855386	140856620	NM_032402	+	1	4378	8.97208	8.63761	0.962722
TRPC4	chr13	38443682	38444228	NM_001135956	-	1	5602	0.246938	0	0
ZNF829	chr19	37406931	37407463	NM_001171979	-	1	8315	0.740814	0.450658	0.608328
NTNG1	chr1	107682889	107684463	NM_001113228	+	1	10680	0.658501	0.187774	0.285154
CHST11	chr12	104850253	104852395	NM_018413	+	1	12802	7.1612	6.2341	0.870539
ZNF625	chr19	12266998	12267686	NM_145233	-	1	14753	1.11122	0.0751097	0.067592
SSTR2	chr17	71160922	71162350	NM_001050	+	1	15525	3.21019	0.112664	0.0350959
ZNF804B	chr7	88388488	88389283	NM_181646	+	1	19698	0	0	#DIV/0!
RFTN1	chr3	16554327	16555413	NM_015150	-	1	21724	4.11563	4.09348	0.994617
GPR12	chr13	27334226	27335205	NM_005288	-	1	22906	0.288094	0	0
SDC2	chr8	97505747	97507607	NM_002998	+	1	23304	10.1245	6.91009	0.682515
LOC643923	chr11	107461743	107462648	NR_028328	+	1	24284	0	0	#DIV/0!
ZNF625-ZNF20	chr19	12266998	12267686	NR_037802	-	1	25043	3.41597	3.9057	1.14336
ZNF331	chr19	54023868	54024560	NM_018555	+	1	27082	3.5806	1.05154	0.293676
RASSF2	chr20	4803013	4804146	NM_014737	-	1	37980	6.09113	5.25768	0.863169
SLC6A15	chr12	85305663	85305876	NM_018057	-	1	713	0	0	#DIV/0!
ZNF304	chr19	57862441	57863236	NM_020657	+	1	1849	4.03332	2.70395	0.670403
FLI1	chr11	128562671	128565011	NM_001271010	+	1	2185	4.65066	3.53015	0.759065
LIFR	chr5	38556222	38557563	NM_001127671	-	1	3473	17.6972	6.87253	0.38834
MMP16	chr8	89339965	89340481	NM_005941	-	1	5778	0.32925	0.0751097	0.228123
TOX2	chr20	42543097	42545137	NM_032883	+	1	5902	2.42822	0.600877	0.247456
TLL1	chr4	166794545	166795341	NM_012464	+	1	5989	1.317	0.600877	0.456246
FAM5B	chr1	177140120	177140323	NM_021165	+	1	7155	0	0	#DIV/0!
MIR4500HG	chr13	88323569	88324640	NR_033829	-	1	7193	0	0	#DIV/0!
PRKCB	chr16	23846941	23848102	NM_002738	+	1	8608	7.53161	4.69435	0.623287
FGF14-IT1	chr13	103046680	103047226	NR_036486	-	1	9653	0	0	#DIV/0!
TNFSF11	chr13	43148277	43149282	NM_003701	+	1	10623	0.205782	2.06552	10.0374
EYA4	chr6	133562086	133563586	NM_172105	+	1	13910	0	0.225329	#DIV/0!
PTF1A	chr10	23480697	23482455	NM_178161	+	1	15025	0	0	#DIV/0!
CLVS2	chr6	123317164	123317753	NM_001010852	+	1	18214	0.0823126	0	0
ZBTB8B	chr1	32930500	32931061	NM_001145720	+	1	18983	0	0	#DIV/0!
FLI1-AS1	chr11	128562671	128565011	NR_038908	-	1	19059	0.205782	0.112664	0.547496
CD38	chr4	15779998	15780729	NM_001775	+	1	20063	1.23469	1.5773	1.27749
C11orf96	chr11	43963626	43966048	NM_001145033	+	1	21017	0.617345	0.225329	0.364997
TMEM178B	chr7	140772358	140774560	NM_001195278	+	1	21176	0.740814	0.150219	0.202776
FOXB1	chr15	60296135	60298520	NM_012182	+	1	21251	0	0	#DIV/0!
MAP1B	chr5	71402877	71404868	NM_005909	+	1	23010	43.0495	11.642	0.270433
METTL24	chr6	110678854	110679108	NM_001123364	-	1	23434	0.0823126	0.0751097	0.912493
ELOVL4	chr6	80656744	80657593	NM_022726	-	1	23502	0.288094	0.225329	0.782136
SYT2	chr1	202678881	202679769	NM_177402	-	1	23744	6.00882	4.31881	0.718744
FGF14-AS2	chr13	103046680	103047226	NR_036487	+	1	25690	0.452719	0.0375548	0.0829539
USP44	chr12	95941906	95942979	NM_001042403	-	1	26268	0	0	#DIV/0!
GRID2	chr4	93226348	93227007	NM_001510	+	1	26812	0	0	#DIV/0!
TENM4	chr11	79148358	79152200	NM_001098816	-	1	27067	0.576188	0.375548	0.65178
SLITRK5	chr13	88323569	88324640	NM_015567	+	1	27769	2.75747	0.375548	0.136193
MIR3650	chr5	38556222	38557563	NR_037423	-	1	28115	0.0411563	0	0
ASTN2	chr9	120175253	120177496	NM_014010	-	1	29748	0.699657	1.38953	1.98601
ZNF660	chr3	44626325	44626794	NM_173658	+	1	30770	1.15238	0.600877	0.521424
PRMT8	chr12	3599966	3603008	NM_019854	+	1	39397	0	0	#DIV/0!
SPOCK3	chr4	168155005	168155765	NM_001204356	-	1	1970	0.123469	0	0
CCDC169	chr13	36871667	36872059	NM_001144981	-	1	4168	0.123469	0	0
AUTS2	chr7	69062374	69065037	NM_015570	+	1	5889	40.0451	51.8257	1.29418
NDRG4	chr16	58497033	58498595	NM_020465	+	1	6437	1.68741	1.53975	0.912493
ST8SIA1	chr12	22486835	22488666	NM_003034	-	1	17986	1.56394	0.638432	0.40822
ZNF790-AS1	chr19	37288342	37288723	NR_040027	+	1	22263	0.205782	0.187774	0.912493
ADHFE1	chr8	67344497	67344989	NM_144650	+	1	34465	0.987751	0.788651	0.798431
CCDC169-SOHLH2	chr13	36871667	36872059	NM_001198910	-	1	36160	0.246938	0	0
NPAS1	chr19	47522904	47525190	NM_002517	+	1	37302	0.246938	0.300439	1.21666
CRH	chr8	67089249	67089962	NM_000756	-	1	44	0	0	#DIV/0!
JAM2	chr21	27011624	27012398	NM_001270407	+	1	356	6.09113	3.11705	0.511736
EMBP1	chr1	121260857	121261525	NR_003955	+	1	1082	0.617345	0.187774	0.304164
CD1D	chr1	158150620	158151503	NM_001766	+	1	9316	3.95101	2.47862	0.627339
RAB39A	chr11	107798958	107799980	NM_017516	+	1	16969	0.535032	0.901316	1.6846
AP3B2	chr15	83378007	83379068	NM_004644	-	1	20175	0.32925	0.0751097	0.228123
TFPI2	chr7	93519366	93520184	NM_006528	-	1	20972	0.370407	0.337993	0.912493
CDH4	chr20	59826977	59828978	NM_001794	+	1	30806	0.0411563	0.0751097	1.82499
KIF5C	chr2	149632682	149633882	NM_004522	+	1	30839	11.4003	0.976426	0.0856491
MPPED2	chr11	30606004	30608128	NM_001145399	-	1	34677	0.288094	0.0751097	0.260712
CNPY1	chr7	155325811	155326357	NM_001103176	-	1	1770	0	0	#DIV/0!
GALNT14	chr2	31360321	31361821	NM_024572	-	1	3042	0.246938	0	0
AK5	chr1	77747314	77748224	NM_012093	+	1	4834	1.23469	1.27686	1.03416
MICU3	chr8	16884363	16885339	NM_181723	+	1	5833	0.452719	0.300439	0.663631
LMO1	chr11	8284102	8285032	NR_073006	-	1	11639	0	0	#DIV/0!
AGTR1	chr3	148415442	148415932	NM_000685	+	1	12313	2.9221	0	0
PREX2	chr8	68864584	68864946	NM_024870	+	1	13529	2.09897	1.72752	0.823033
GPM6A	chr4	176923075	176923630	NM_001261447	-	1	15495	0.123469	0.0751097	0.608328
TIAM1	chr21	32929927	32932017	NM_003253	-	1	17647	7.03773	1.05154	0.149414
NSG1	chr4	4387593	4389919	NM_001040101	+	1	24158	2.55169	2.25329	0.883057
DPY19L2	chr12	64061836	64062774	NM_173812	-	1	11782	1.39931	0.375548	0.26838
EMB	chr5	49736607	49737300	NM_198449	-	1	23537	15.6394	12.1678	0.77802
HCK	chr20	30639908	30640786	NM_001172130	+	1	12799	3.33366	3.26727	0.980085
CSMD2	chr1	34628783	34630976	NM_052896	-	1	39041	0.0411563	0.300439	7.29994
KLHL14	chr18	30349690	30352302	NM_020805	-	1	870	0.0823126	0.112664	1.36874
RGMA	chr15	93631428	93633173	NM_020211	-	1	2186	2.34591	0.300439	0.128069
NR3C1	chr5	142782071	142785071	NM_001204263	-	1	3124	30.0853	8.93805	0.297091
RSPO3	chr6	127439265	127441072	NM_032784	+	1	3601	0.699657	0.112664	0.161028
ZNF682	chr19	20149855	20150175	NM_033196	-	1	4614	1.68741	0.675987	0.400606
NGFR	chr17	47572345	47575316	NM_002507	+	1	6027	0.493876	0.150219	0.304164
ADD2	chr2	70994447	70995385	NM_001185054	-	1	6554	0.452719	0.225329	0.497723
NRCAM	chr7	108095401	108097206	NM_001193584	-	1	8318	0.864283	2.3284	2.69403
FGF5	chr4	81187494	81187913	NM_033143	+	1	9306	0	0.0375548	#DIV/0!
IGSF9B	chr11	133825337	133827457	NM_014987	-	1	11533	0.699657	1.20175	1.71763
VCAN	chr5	82768387	82769268	NM_001126336	+	1	11873	9.21901	10.4027	1.12839
NLGN4X	chrX	6144120	6145906	NM_181332	-	1	12137	2.01666	0.262884	0.130356
ZNF549	chr19	58038572	58039208	NM_153263	+	1	14933	3.00441	0.826206	0.274998
FBXL7	chr5	15500076	15500923	NM_012304	+	1	16931	3.16904	2.66639	0.841389
EMILIN2	chr18	2846565	2848175	NM_032048	+	1	18799	3.37482	5.10746	1.5134
HELT	chr4	185939222	185942747	NM_001029887	+	1	20061	0	0	#DIV/0!
PTPRM	chr18	7566557	7568830	NM_001105244	+	1	20266	10.7418	9.16338	0.853058
B3GAT1	chr11	134281380	134282919	NM_054025	-	1	21123	0	0.225329	#DIV/0!
DPF1	chr19	38719089	38720627	NM_001135156	-	1	22695	0	0.112664	#DIV/0!
ZNF793	chr19	37997790	37998125	NM_001013659	+	1	25175	3.82754	3.34238	0.873246
LONRF2	chr2	100937779	100939059	NM_198461	-	1	25536	2.34591	0	0
ZNF788	chr19	12203028	12203503	NR_027049	+	1	29128	0.864283	0.488213	0.564876
PDGFD	chr11	104034536	104035058	NM_033135	-	1	30124	8.10779	5.0699	0.625312
EPHB1	chr3	134514085	134515980	NM_004441	+	1	32758	0.288094	0.225329	0.782136
ZNF773	chr19	58011124	58011743	NM_198542	+	1	32889	0.576188	0.563322	0.977671
MVB12A	chr19	17530650	17531535	NM_138401	+	1	37307	4.2391	3.83059	0.903633
EGFLAM	chr5	38257825	38259136	NM_001205301	+	1	87	0.617345	0.300439	0.486663
WASF3	chr13	27131568	27132677	NM_006646	+	1	250	3.41597	1.12664	0.329817
LOC100127983	chr8	91997230	91997906	NM_001190972	-	1	812	0.0823126	0.112664	1.36874
SNX32	chr11	65601069	65601551	NM_152760	+	1	1158	0.205782	0.150219	0.729994
ZEB1	chr10	31607227	31610094	NM_001174093	+	1	1522	13.7051	11.3791	0.830286
NRG1	chr8	32405407	32406901	NM_001160002	+	1	2668	1.02891	0.150219	0.145999
KAL1	chrX	8698857	8700500	NM_000216	-	1	3864	0.905439	4.76946	5.26757
CHST15	chr10	125851151	125853233	NM_001270764	-	1	3906	6.04998	4.16859	0.689025
DKK2	chr4	107956555	107957453	NM_014421	-	1	4793	0	0	#DIV/0!
ZNF492	chr19	22817274	22817546	NM_020855	+	1	5085	0.411563	0.150219	0.364997
ELMO1	chr7	37487354	37488672	NM_001206480	-	1	6195	8.43704	10.7031	1.26859
MAGI2-AS3	chr7	79081565	79081879	NR_038345	+	1	6324	0.576188	0.112664	0.195534
HECW1	chr7	43152020	43153340	NM_015052	+	1	6572	0.123469	0.225329	1.82499
SOX5	chr12	24714956	24716243	NM_001261414	-	1	7004	1.56394	0.788651	0.504272
LMO2	chr11	33890357	33891495	NM_001142316	-	1	7871	10.8653	6.15899	0.566851
PAX2	chr10	102503913	102506146	NM_003989	+	1	8008	0	0	#DIV/0!
SUSD5	chr3	33259919	33260763	NM_015551	-	1	8054	0.246938	0.112664	0.456246
ZNF415	chr19	53635625	53636230	NM_018355	-	1	10041	4.03332	0.450658	0.111734
NPTX1	chr17	78449507	78452783	NM_002522	-	1	10069	0.246938	0.150219	0.608328
NBLA00301	chr4	174450046	174451469	NR_003679	+	1	10233	0	0	#DIV/0!
TCF4	chr18	53257018	53257309	NM_001243227	-	1	10642	15.9275	14.2333	0.89363
VAT1L	chr16	77822375	77823134	NM_020927	+	1	11048	2.38707	1.87774	0.786632
BHLHE22	chr8	65492935	65494452	NM_152414	+	1	13123	0.0411563	0.187774	4.56246
FAM19A5	chr22	48884884	48887043	NM_001082967	+	1	14404	0.617345	0.187774	0.304164
CCBE1	chr18	57363714	57365001	NM_133459	-	1	15278	0.987751	0.112664	0.114062
CNRIP1	chr2	68546339	68547111	NM_001111101	-	1	16062	1.07006	0.488213	0.456246
UNC5C	chr4	96469456	96469667	NM_003728	-	1	17009	9.46595	2.92928	0.309454
RUNX1T1	chr8	93114056	93115979	NM_175634	-	1	17953	4.8976	3.41749	0.697788
SHISA3	chr4	42399152	42400802	NM_001080505	+	1	18945	0.32925	0	0
TCF24	chr8	67873388	67875600	NM_001193502	-	1	20186	0	0	#DIV/0!
ANKLE1	chr19	17392383	17393775	NM_152363	+	1	21428	0.0823126	0.112664	1.36874
PDE1C	chr7	32110063	32110910	NM_001191056	-	1	21944	0.905439	0.525768	0.580677
MSC	chr8	72755783	72756667	NM_005098	-	1	22224	1.19353	1.38953	1.16421
CD40	chr20	44746822	44747060	NM_001250	+	1	24282	2.71632	0.938871	0.345641
HAND2	chr4	174450046	174451469	NM_021973	-	1	27086	0.411563	0	0
ZEB1-AS1	chr10	31607227	31610094	NR_024284	-	1	27605	1.15238	2.62884	2.28123
ZNF880	chr19	52873084	52873572	NM_001145434	+	1	27936	2.88094	1.87774	0.65178
LOC100132891	chr8	72755783	72756667	NR_033651	+	1	29289	4.81529	3.56771	0.740913
MYO3A	chr10	26222921	26224022	NM_017433	+	1	29819	2.51054	0.150219	0.0598356
PALM2	chr9	112402767	112403349	NM_001037293	+	1	30195	0.617345	2.02796	3.28497
CAMK2N2	chr3	183977548	183980633	NM_033259	-	1	30509	0.0411563	0.0751097	1.82499
ABCC8	chr11	17497463	17498626	NM_000352	-	1	30734	1.11122	0	0
C9orf50	chr9	132382432	132383004	NM_199350	-	1	35594	0.0823126	0.713542	8.66868
TMEM163	chr2	135475698	135476993	NM_030923	-	1	36266	0.288094	0.563322	1.95534
EDIL3	chr5	83679584	83680720	NM_005711	-	1	36558	43.7903	9.16338	0.209256
CLGN	chr4	141348042	141348957	NM_004362	-	1	36610	1.39931	0.150219	0.107352
LRRC3B	chr3	26664104	26664796	NM_052953	+	1	37161	0.0823126	0	0
GPC5	chr13	92051153	92051716	NM_004466	+	1	8121	1.07006	0.300439	0.280767
KCNIP4	chr4	21950085	21950346	NM_147182	-	1	16103	2.09897	2.62884	1.25244
ZMAT4	chr8	40755164	40755404	NM_001135731	-	1	19253	0.0411563	0	0
SYNE1	chr6	152957810	152958472	NM_033071	-	1	27891	23.8707	18.9276	0.792925
BCAT1	chr12	25101607	25102073	NM_001178092	-	1	2345	2.59285	1.84019	0.709716
ZNF610	chr19	52839444	52839937	NM_001161425	+	1	13366	1.317	1.38953	1.05507
BMP3	chr4	81951941	81952808	NM_001201	+	1	38996	16.2979	0.0375548	0.00230427
SLC47A1	chr17	19436788	19437692	NM_018242	+	1	291	0.740814	0.225329	0.304164
PPFIA2	chr12	82152320	82152674	NM_003625	-	1	474	1.81088	0.488213	0.2696
PPP2R2B	chr5	146257346	146258575	NM_001271948	-	1	717	0.164625	0.0751097	0.456246
STAC2	chr17	37380953	37382363	NM_198993	-	1	1459	0.0823126	0	0
NCAM1	chr11	112832524	112834490	NM_001242607	+	1	1750	2.88094	0.788651	0.273748
APBB1	chr11	6439863	6440732	NR_047512	-	1	2570	1.07006	0.788651	0.737013
CNKSR2	chrX	21391835	21393408	NM_001168649	+	1	2868	0.123469	0.0751097	0.608328
GJC1	chr17	42906810	42908061	NM_005497	-	1	3950	0.740814	1.5773	2.12915
ZNF790	chr19	37328896	37329518	NM_001242802	-	1	4101	1.317	3.15461	2.39529
AGXT2L1	chr4	109683729	109684362	NM_001146627	-	1	4120	0	0	#DIV/0!
THEGL	chr4	57396748	57397269	NM_001256475	+	1	4679	0	0.0751097	#DIV/0!
SYT6	chr1	114695136	114696672	NM_001270805	-	1	5132	0	0.0751097	#DIV/0!
GPR101	chrX	136113583	136114232	NM_054021	-	1	5437	0	0	#DIV/0!
AFAP1L1	chr5	148650920	148651772	NM_001146337	+	1	5665	0.535032	0.413103	0.772109
ST8SIA5	chr18	44336183	44337110	NM_013305	-	1	5756	0	0	#DIV/0!
LOC285484	chr4	6200912	6202724	NR_037863	+	1	6950	0	0.150219	#DIV/0!
WDR17	chr4	176986921	176987360	NM_181265	+	1	7509	0.535032	0.150219	0.280767
ST8SIA4	chr5	100238722	100239138	NM_175052	-	1	9409	0.946595	1.80263	1.90433
DPP10	chr2	115918737	115920765	NM_001004360	+	1	9434	4.77413	0	0
CHST10	chr2	101033606	101034296	NM_004854	-	1	9757	0.535032	0.150219	0.280767
KAZN	chr1	14924610	14925993	NM_201628	+	1	10304	2.75747	1.23931	0.449437
LRFN5	chr14	42075858	42076329	NM_152447	+	1	10605	0.0823126	0.187774	2.28123
LOC401463	chr8	65488536	65489116	NR_015374	-	1	11502	0	0.0751097	#DIV/0!
BTG4	chr11	111383168	111383892	NM_017589	-	1	11667	0	0	#DIV/0!
MIR129-2	chr11	43602545	43603215	NR_029697	+	1	12439	0	0	#DIV/0!
LHFPL3	chr7	103968783	103969959	NM_199000	+	1	12983	0.288094	0.112664	0.391068
CNTN4	chr3	2140029	2141784	NM_175607	+	1	13323	1.48163	1.84019	1.242
NTRK3	chr15	88799522	88801017	NM_001012338	-	1	13345	0.32925	0.150219	0.456246
RIC3	chr11	8190226	8190671	NM_001206672	-	1	13993	0.576188	0	0
PPM1E	chr17	56832961	56833986	NM_014906	+	1	14076	0.493876	0.262884	0.532287
JAKMIP1	chr4	6200912	6202724	NM_144720	-	1	14168	0.0823126	0	0
ZDHHC22	chr14	77605885	77608304	NM_174976	-	1	15552	0.164625	0.150219	0.912493
CCDC177	chr14	70041213	70041662	NM_001271507	-	1	15740	0.0823126	0	0
UBE2QL1	chr5	6448753	6449629	NM_001145161	+	1	16640	0.576188	0.225329	0.391068
GPR88	chr1	101004471	101005885	NM_022049	+	1	17676	0	0.112664	#DIV/0!
TBC1D30	chr12	65218245	65219143	NM_015279	+	1	20431	5.8442	4.54413	0.777546
ASCL1	chr12	103351579	103352695	NM_004316	+	1	20632	0.493876	0.0375548	0.076041
SLFN11	chr17	33700487	33700760	NM_001104588	-	1	20838	4.28026	3.19216	0.745787
TMEFF2	chr2	193058995	193060812	NM_016192	-	1	21860	0.205782	0.150219	0.729994
SVEP1	chr9	113341213	113342029	NM_153366	-	1	22870	1.85203	1.95285	1.05444
ZNF264	chr19	57702696	57703425	NM_003417	+	1	24039	26.34	28.9923	1.10069
DPY19L2P4	chr7	89747892	89749036	NR_003551	+	1	24706	0.0823126	0.450658	5.47496
MIR34C	chr11	111383168	111383892	NR_029840	+	1	28387	0	0	#DIV/0!
B3GAT2	chr6	71665360	71667132	NM_080742	-	1	28975	6.37923	4.6568	0.729994
KIRREL3	chr11	126870226	126870552	NM_032531	-	1	29046	0.493876	0.150219	0.304164
LOC389023	chr2	115918737	115920765	NR_036580	-	1	29885	1.76972	0	0
KCNK10	chr14	88792904	88793324	NM_021161	-	1	30347	3.62176	3.45504	0.953969
VWC2	chr7	49813008	49815752	NM_198570	+	1	30518	0	0	#DIV/0!
ADAMTS1	chr21	28216558	28218117	NM_006988	-	1	30814	6.66732	3.68037	0.552002
TMEM59L	chr19	18722358	18724001	NM_012109	+	1	31959	0.246938	0.0751097	0.304164
ZKSCAN7	chr3	44596535	44597018	NM_025169	+	1	34032	0.740814	0.863761	1.16596
WNT1	chr12	49371690	49375550	NM_005430	+	1	34574	0.0823126	0	0
KCNK9	chr8	140714585	140718259	NM_016601	-	1	34717	0	0	#DIV/0!
PDE4A	chr19	10529627	10532004	NM_001111307	+	1	35085	8.39589	16.0359	1.90997
GREB1L	chr18	18821383	18823349	NM_001142966	+	1	35835	0	0.262884	#DIV/0!
ROR2	chr9	94711117	94713075	NM_004560	-	1	38019	3.99216	1.05154	0.2634
CACNA2D3	chr3	54155239	54157025	NM_018398	+	1	38139	0.246938	0.150219	0.608328
CTNND2	chr5	11903550	11904703	NM_001332	-	1	38302	0.740814	0.112664	0.152082
RPRM	chr2	154334449	154335458	NM_019845	-	1	38395	0	0.0751097	#DIV/0!
GPR139	chr16	20084707	20085305	NM_001002911	-	1	38687	0	0	#DIV/0!
GSX2	chr4	54966163	54968063	NM_133267	+	1	39524	0	0	#DIV/0!
ZSWIM2	chr2	187713846	187714069	NM_182521	-	1	39779	0	0	#DIV/0!
MIR34B	chr11	111383168	111383892	NR_029839	+	1	39987	0	0	#DIV/0!
HAND1	chr5	153857038	153859113	NM_004821	-	1	84	0	0	#DIV/0!
GSTM2	chr1	110210581	110210956	NM_000848	+	1	656	5.06223	1.53975	0.304164
LOC100289092	chr16	28890954	28891868	NR_046288	-	1	848	0.0823126	0.0375548	0.456246
NELL1	chr11	20690579	20691845	NM_006157	+	1	1164	0.123469	0.337993	2.73748
GUCY1A3	chr4	156588297	156589292	NM_000856	+	1	1508	2.88094	2.62884	0.912493
CNTN1	chr12	41086522	41087102	NM_001256063	+	1	2826	0.905439	0.112664	0.124431
CD34	chr1	208084098	208084513	NM_001773	-	1	3329	6.17345	3.30482	0.535329
ARMC4	chr10	28287447	28288057	NM_018076	-	1	3966	0.0411563	0.0375548	0.912493
BMP6	chr6	7726095	7728161	NM_001718	+	1	4978	9.1367	15.5477	1.70168
CNR1	chr6	88875397	88877449	NM_001160226	-	1	5005	0.823126	0.0375548	0.0456246
GRIA4	chr11	105481126	105481422	NR_046356	+	1	5269	0.617345	0.563322	0.912493
ITGA4	chr2	182321761	182323029	NM_000885	+	1	5482	6.66732	7.17297	1.07584
PCDH11X	chrX	91033993	91034623	NM_032967	+	1	6575	1.11122	0	0
ADAMTS19	chr5	128795503	128797417	NM_133638	+	1	6659	0.164625	0	0
RERG	chr12	15373986	15374514	NM_032918	-	1	6717	0.493876	0.713542	1.44478
CELF2	chr10	11207178	11207980	NM_001025076	+	1	7006	35.9706	45.1409	1.25494
SPG20	chr13	36919737	36921004	NM_001142295	-	1	7389	7.03773	2.96683	0.421561
LOC146880	chr17	62774366	62777797	NR_026899	-	1	7642	8.27242	17.3879	2.10191
KCNQ5	chr6	73330942	73333109	NM_001160134	+	1	7657	0.411563	0.150219	0.364997
ESR1	chr6	152128822	152129771	NM_000125	+	1	9101	0.370407	0.563322	1.52082
ZNF544	chr19	58739943	58740554	NM_014480	+	1	9555	7.03773	7.13542	1.01388
C12orf42	chr12	103889148	103889843	NM_001099336	-	1	10214	0.0823126	0	0
PDZRN4	chr12	41582155	41582975	NM_001164595	+	1	10227	0.411563	0.225329	0.547496
MOXD1	chr6	132722093	132722901	NM_015529	-	1	10410	1.64625	2.55373	1.55124
CCDC178	chr18	31020510	31020847	NM_198995	-	1	10970	0.205782	0	0
ZSCAN12	chr6	28367124	28367651	NR_028077	-	1	11289	2.9221	3.0795	1.05386
CR1	chr1	207669637	207670015	NM_000651	+	1	11300	1.85203	1.05154	0.567773
EFCAB1	chr8	49647702	49647988	NM_024593	-	1	12184	0.123469	0	0
HYDIN	chr16	71264360	71264659	NM_017558	-	1	12940	0.493876	0.187774	0.380205
LINC00643	chr14	62583679	62584279	NR_015358	+	1	15995	0	0	#DIV/0!
DIRAS1	chr19	2720630	2721783	NM_145173	-	1	17658	0.658501	0.262884	0.399215
NID1	chr1	236227682	236228817	NM_002508	-	1	21101	13.0877	16.8246	1.28552
SPG20OS	chr13	36919737	36921004	NR_045181	+	1	22067	0.0823126	0.0375548	0.456246
CCK	chr3	42304944	42305311	NM_001174138	-	1	22597	0	0	#DIV/0!
CUX2	chr12	111471061	111471578	NM_015267	+	1	22787	0.0823126	0	0
DOK5	chr20	53091733	53092993	NM_018431	+	1	25525	0.0823126	0.337993	4.10622
FAM72D	chr1	143912736	143916156	NM_207418	-	1	26199	1.317	0.112664	0.0855462
UCP1	chr4	141489962	141490378	NM_021833	-	1	27334	0	0	#DIV/0!
DOK6	chr18	67067509	67069168	NM_152721	+	1	27882	0.946595	0.150219	0.158694
RELN	chr7	103629525	103630652	NM_005045	-	1	28885	1.35816	0.112664	0.0829539
SLC30A3	chr2	27484873	27488189	NM_003459	-	1	29168	0	0	#DIV/0!
LOC100287846	chr8	48100163	48100914	NR_037168	+	1	31271	0.164625	0.187774	1.14062
FOXG1	chr14	29234889	29235908	NM_005249	+	1	31840	0	0	#DIV/0!
TBX5	chr12	114843022	114843610	NM_181486	-	1	38184	0	0	#DIV/0!
POM121L2	chr6	27279794	27280635	NM_033482	-	1	3935	0.246938	0.0375548	0.152082
RADIL	chr7	4922707	4923576	NM_018059	-	1	33243	0.0823126	0	0
ZNF83	chr19	53193139	53193945	NM_001242538	-	1	788	5.5561	9.01316	1.62221
C8orf42	chr8	494155	496083	NM_175075	-	1	1254	8.51936	1.31442	0.154286
DNAH11	chr7	21582443	21583313	NM_001277115	+	1	1909	8.06664	7.21053	0.89387
ADAM8	chr10	135089969	135090491	NM_001109	-	1	5791	1.11122	1.65241	1.48702
ZNF550	chr19	58070553	58071273	NM_001277092	-	1	6594	2.30475	3.60526	1.56427
ALOX15P1	chr17	6559363	6560803	NR_045985	+	1	6715	0	0	#DIV/0!
SOX21	chr13	95363152	95366051	NM_007084	-	1	12084	0	0	#DIV/0!
NHSL2	chrX	71130679	71131820	NM_001013627	+	1	17943	1.44047	0.788651	0.547496
SUSD4	chr1	223536842	223538628	NM_017982	-	1	18148	0.288094	0.0751097	0.260712
CADM1	chr11	115373574	115375881	NM_001098517	-	1	20514	5.26801	3.0795	0.584566
TMEM74	chr8	109799429	109799847	NM_153015	-	1	21400	0.0823126	0.0751097	0.912493
ABR	chr17	1082376	1083833	NM_021962	-	1	22060	96.1411	110.299	1.14726
WNT7A	chr3	13919939	13922335	NM_004625	-	1	23453	0.0823126	0	0
SFRP2	chr4	154709512	154710827	NM_003013	-	1	23606	0.0823126	0.337993	4.10622
MMP17	chr12	132312439	132315739	NM_016155	+	1	24766	0.0823126	0	0
EGFL6	chrX	13587648	13588221	NM_001167890	+	1	26638	0.0411563	0.0751097	1.82499
DMRT3	chr9	976162	977828	NM_021240	+	1	30731	0	0	#DIV/0!
ICAM1	chr19	10380287	10381965	NM_000201	+	1	36233	5.26801	6.72231	1.27606
MAMLD1	chrX	149529540	149534090	NM_001177465	+	1	36272	1.9755	1.27686	0.646349
ALX4	chr11	44330542	44331761	NM_021926	-	1	38249	0.0411563	0	0
HIST1H4L	chr6	27841001	27841244	NM_003546	-	1	40788	0.164625	0.112664	0.684369
VEGFC	chr4	177713243	177714457	NM_005429	-	1	40970	0.493876	0.450658	0.912493
LOC440461	chr17	66192363	66195873	NR_027283	+	1	345	0	0.0751097	#DIV/0!
EGR2	chr10	64574660	64578778	NM_000399	-	1	424	2.30475	0.901316	0.391068
HLTF-AS1	chr3	148803904	148804557	NR_046648	+	1	504	0.0411563	0.150219	3.64997
UNC5A	chr5	176236761	176238081	NM_133369	+	1	911	0.32925	0.0375548	0.114062
PLCG2	chr16	81812710	81813707	NM_002661	+	1	946	5.51495	8.48739	1.53898
BAIAP3	chr16	1382916	1384735	NM_001199099	+	1	1129	4.60951	8.90049	1.9309
NTRK1	chr1	156828804	156831102	NM_001012331	+	1	1294	0.0411563	0	0
MIR4787	chr3	50712068	50713007	NR_039950	+	1	1304	0	0	#DIV/0!
SEZ6L	chr22	26565199	26565986	NM_001184776	+	1	1721	0.123469	0.0751097	0.608328
TBL1Y	chrY	6778574	6780028	NM_134258	+	1	1903	0.493876	0.901316	1.82499
BDNF	chr11	27743472	27744564	NM_170731	-	1	2500	0.452719	0.638432	1.41022
ARMCX4	chrX	100740221	100740601	NR_045862	+	1	2813	2.51054	4.99479	1.98953
LHX9	chr1	197880016	197881637	NM_001014434	+	1	2836	0	0	#DIV/0!
ZNF347	chr19	53661430	53661848	NM_001172675	-	1	3783	4.32141	3.15461	0.729994
DNM3	chr1	171810467	171811325	NM_001136127	+	1	3942	0.740814	1.95285	2.63609
TBX15	chr1	119531991	119532196	NM_152380	-	1	4240	0	0.0751097	#DIV/0!
FAM133A	chrX	92928546	92928786	NM_001171110	+	1	4582	0	0	#DIV/0!
BAALC	chr8	104152726	104153390	NM_024812	+	1	5674	0.987751	0.337993	0.342185
CH25H	chr10	90967555	90967900	NM_003956	-	1	5878	2.30475	1.80263	0.782136
ATP1B2	chr17	7554139	7555338	NM_001678	+	1	5951	1.85203	0.150219	0.0811104
TWIST1	chr7	19156050	19158042	NM_000474	-	1	6414	0.0823126	0.0375548	0.456246
VAV3	chr1	108507251	108507841	NM_006113	-	1	8118	126.226	58.1724	0.460858
NTF3	chr12	5539895	5540703	NM_001102654	+	1	8280	0.0411563	0	0
TSHZ2	chr20	51589707	51590020	NM_173485	+	1	8699	3.37482	1.23931	0.367223
NTNG2	chr9	135036713	135038933	NM_032536	+	1	8848	0.0411563	0.112664	2.73748
CBLN2	chr18	70208974	70211790	NM_182511	-	1	9112	2.46938	0.375548	0.152082
SEMA6D	chr15	47476369	47477499	NM_001198999	+	1	9151	56.7957	14.3459	0.252589
PXDN	chr2	1746833	1748971	NM_012293	-	1	9818	10.2479	9.68915	0.945474
SYT3	chr19	51142284	51142986	NM_032298	-	1	10172	0	0	#DIV/0!
MIR4281	chr5	176056520	176057494	NR_036239	-	1	10380	0	0	#DIV/0!
OLFM1	chr9	137967110	137967727	NM_014279	+	1	10662	5.35032	5.55811	1.03884
NKX2-5	chr5	172661486	172662228	NM_004387	-	1	10739	0	0	#DIV/0!
IRF4	chr6	391188	393790	NR_046000	+	1	10786	10.3302	17.6132	1.70502
SHISA9	chr16	12994574	12997690	NM_001145205	+	1	10927	0.205782	0.0751097	0.364997
LEPR	chr1	65991001	65991811	NM_001198687	+	1	11381	5.39148	3.98081	0.738353
LAYN	chr11	111410932	111412199	NM_001258390	+	1	11566	1.07006	0.375548	0.350959
KL	chr13	33589928	33591428	NM_004795	+	1	11890	1.11122	0.300439	0.270368
FAM72A	chr1	206135444	206138863	NM_001123168	+	1	12023	1.23469	0.675987	0.547496
ST3GAL1	chr8	134581969	134584875	NM_003033	-	1	12820	3.74522	1.99041	0.531452
AMOTL1	chr11	94501366	94502696	NM_130847	+	1	12904	14.4459	4.99479	0.345759
GATA4	chr8	11559596	11562956	NM_002052	+	1	12974	0	0.0751097	#DIV/0!
FAM65B	chr6	24910626	24911285	NM_014722	-	1	13672	2.01666	1.72752	0.856626
ADCY1	chr7	45613386	45615504	NM_021116	+	1	14153	3.2925	1.95285	0.59312
KCNK17	chr6	39281135	39282215	NM_031460	-	1	14711	0.288094	0.0751097	0.260712
RASGRF1	chr15	79381804	79384209	NM_001145648	-	1	15199	0.0823126	0.225329	2.73748
SHISA7	chr19	55953371	55954641	NM_001145176	-	1	15653	0	0	#DIV/0!
RIMS2	chr8	104510870	104513913	NM_001100117	+	1	15686	0.452719	0.0375548	0.0829539
VAV3-AS1	chr1	108507251	108507841	NR_046653	+	1	16068	0	0	#DIV/0!
DGKG	chr3	186078710	186080111	NM_001080745	-	1	16177	0.370407	0.826206	2.23054
MRC2	chr17	60704542	60705943	NM_006039	+	1	16677	2.51054	1.65241	0.658191
EIF4E1B	chr5	176056520	176057494	NM_001099408	+	1	16775	0	0	#DIV/0!
C20orf201	chr20	62714763	62715761	NM_001007125	-	1	16916	0	0	#DIV/0!
SMOC1	chr14	70345943	70346527	NM_001034852	+	1	17491	0.246938	0.150219	0.608328
C7orf57	chr7	48074838	48075985	NM_001100159	+	1	18109	0.0823126	0.0751097	0.912493
VSX2	chr14	74706188	74708192	NM_182894	+	1	18836	0	0	#DIV/0!
EPHA7	chr6	94126272	94129677	NM_004440	-	1	18947	2.83979	1.12664	0.396736
C8orf56	chr8	104152726	104153390	NR_027071	-	1	19026	0.0823126	0	0
PTCHD2	chr1	11538669	11540342	NM_020780	+	1	19057	0.123469	0.0751097	0.608328
SH3GL3	chr15	84115762	84116921	NR_026799	+	1	19099	0	0	#DIV/0!
STARD8	chrX	67913299	67914134	NM_001142504	+	1	19226	0.288094	0.337993	1.1732
HLTF	chr3	148803904	148804557	NM_003071	-	1	19726	6.62617	8.29962	1.25255
DCLK1	chr13	36705040	36705707	NM_004734	-	1	20197	0.32925	0.225329	0.684369
KY	chr3	134369464	134370242	NM_178554	-	1	20507	0.288094	0.150219	0.521424
SPSB4	chr3	140769886	140771080	NM_080862	+	1	20659	0	0	#DIV/0!
DOCK3	chr3	50712068	50713007	NM_004947	+	1	20803	0.699657	1.05154	1.50293
TMEFF1	chr9	103235171	103236627	NM_003692	+	1	21025	0.205782	0.300439	1.45999
CRISPLD1	chr8	75896528	75897116	NM_031461	+	1	21573	0.205782	0.0375548	0.182499
ZNF334	chr20	45142000	45142337	NR_073026	-	1	22309	0.905439	0.225329	0.248862
SNTG2	chr2	945686	946774	NM_018968	+	1	22335	0.0411563	0.150219	3.64997
TRIM71	chr3	32858194	32860506	NM_001039111	+	1	22967	0	0	#DIV/0!
GFRA1	chr10	118030732	118034230	NM_001145453	-	1	23282	3.04557	3.34238	1.09746
LAMP5	chr20	9495253	9495597	NM_001199897	+	1	24200	0.32925	0.0751097	0.228123
NEUROD2	chr17	37761691	37763551	NM_006160	-	1	24356	0.0411563	0	0
ZDBF2	chr2	207139336	207140031	NM_020923	+	1	24765	4.93876	9.16338	1.8554
FBN1	chr15	48936810	48938577	NM_000138	-	1	25667	6.37923	9.23849	1.44821
SYN3	chr22	33453892	33454505	NM_001135774	-	1	25865	0.0411563	3.37993	82.1243
KCND2	chr7	119912840	119913883	NM_012281	+	1	25958	0	0	#DIV/0!
ARRDC2	chr19	18117908	18118305	NM_015683	+	1	26697	4.73298	4.61924	0.97597
VIM	chr10	17270430	17272617	NM_003380	+	1	26726	66.7144	60.0126	0.899545
INSRR	chr1	156828804	156831102	NM_014215	-	1	26952	0.164625	0	0
ADAMTS12	chr5	33892191	33892403	NM_030955	-	1	28522	0.370407	0.713542	1.92637
OPRL1	chr20	62714763	62715761	NM_001200019	+	1	28890	0.0823126	0.150219	1.82499
LINC00693	chr3	28616663	28617970	NR_038840	+	1	29139	0	0.0375548	#DIV/0!
ZNF229	chr19	44952416	44952809	NM_014518	-	1	29836	0.78197	0.300439	0.384207
TRIB2	chr2	12856625	12859019	NR_027303	+	1	30787	3.95101	4.39391	1.1121
DAB1	chr1	58715272	58716095	NM_021080	-	1	30816	0	0.826206	#DIV/0!
SNCB	chr5	176056520	176057494	NM_003085	-	1	31146	0	0	#DIV/0!
VGLL2	chr6	117586482	117587156	NM_182645	+	1	31301	0	0	#DIV/0!
SLC16A12	chr10	91294947	91295925	NM_213606	-	1	32404	0.987751	0	0
DPY19L2P1	chr7	35225363	35226580	NR_002833	-	1	33111	0.0823126	0	0
PHF21B	chr22	45403036	45406372	NM_001242450	-	1	33190	0	0.0375548	#DIV/0!
NAP1L3	chrX	92928546	92928786	NM_004538	-	1	33649	0.617345	0.0751097	0.121666
GABBR2	chr9	101469579	101472154	NM_005458	-	1	34005	0.164625	0	0
ANKRD34B	chr5	79864842	79866447	NM_001004441	-	1	34714	0	0	#DIV/0!
NXN	chr17	881733	883381	NM_022463	-	1	35184	1.48163	0.300439	0.202776
MIR9-1	chr1	156390403	156391581	NR_029691	-	1	35515	0	0	#DIV/0!
TUBB2B	chr6	3227025	3229688	NM_178012	-	1	35520	7.61392	0.262884	0.0345267
C9orf171	chr9	135285310	135285897	NM_207417	+	1	35570	0.0411563	0	0
CCDC8	chr19	46916587	46916862	NM_032040	-	1	35670	0.164625	0.112664	0.684369
RNF220	chr1	44871109	44874047	NM_018150	+	1	36221	30.6615	38.719	1.26279
MXRA5	chrX	3263353	3265347	NM_015419	-	1	36279	23.0064	20.4298	0.888007
DLX4	chr17	48045788	48047207	NM_138281	+	1	36898	0.0823126	0.112664	1.36874
RPS6KA2	chr6	167039962	167041679	NM_021135	-	1	38688	9.46595	7.92407	0.837113
ABHD8	chr19	17413733	17414486	NM_024527	-	1	38744	0.699657	0.638432	0.912493
ADAMTS8	chr11	130297401	130298517	NM_007037	-	1	39712	0.699657	0.262884	0.375732
PNPLA5	chr22	44287497	44288061	NM_138814	-	1	40487	0	0	#DIV/0!
LRP1B	chr2	142887724	142888553	NM_018557	-	1	40834	0.0823126	0.150219	1.82499
GYPC	chr2	127413696	127414171	NM_016815	+	1	1190	2.01666	1.68997	0.838003
RAB11FIP4	chr17	29718230	29719291	NM_032932	+	1	3854	33.8716	24.6735	0.728442
C8orf34	chr8	69242920	69243803	NM_052958	+	1	4171	0.123469	0.187774	1.52082
TUSC3	chr8	15397636	15398287	NM_178234	+	1	4533	5.96767	0.450658	0.0755166
LOC286189	chr8	69242920	69243803	NR_038877	-	1	4754	0	0	#DIV/0!
MAGI2	chr7	79082174	79082427	NM_012301	-	1	5414	1.6051	0.863761	0.538137
CDH22	chr20	44935932	44937310	NM_021248	-	1	5956	0.205782	0	0
SLC1A6	chr19	15090016	15090873	NM_001272088	-	1	9030	0	0	#DIV/0!
ST6GALNAC5	chr1	77333111	77334534	NM_030965	+	1	11400	0.78197	0.112664	0.144078
DOCK2	chr5	169064270	169064702	NM_004946	+	1	12415	4.85644	7.77385	1.60073
ADAMTS2	chr5	178770724	178772794	NM_014244	-	1	13832	1.15238	1.61486	1.40133
CCDC181	chr1	169396621	169396869	NM_021179	-	1	14147	0.370407	0.225329	0.608328
FAM72B	chr1	120835961	120839391	NM_001100910	+	1	16106	0.78197	0	0
ZNF274	chr19	58694501	58695107	NM_016324	+	1	16233	8.72514	5.44545	0.62411
DAAM2	chr6	39760066	39760426	NM_015345	+	1	17097	16.4214	5.70833	0.347616
ACOT12	chr5	80689818	80690228	NM_130767	-	1	17235	0	0	#DIV/0!
SEPT5-GP1BB	chr22	19705510	19706557	NR_037611	+	1	18445	0.617345	0.112664	0.182499
DZIP1	chr13	96296143	96297059	NM_198968	-	1	18756	2.14013	1.08909	0.50889
KCNAB1	chr3	156008991	156009320	NM_172159	+	1	21885	4.56835	3.60526	0.789183
ADAP2	chr17	29248847	29249926	NM_018404	+	1	22449	3.41597	3.19216	0.93448
PPP1R3C	chr10	93392667	93393147	NM_005398	-	1	24724	0.370407	0.938871	2.5347
PSD2	chr5	139174904	139176172	NM_032289	+	1	24741	0.0411563	0.0751097	1.82499
SEPT5	chr22	19705510	19706557	NM_001009939	+	1	27805	0.411563	0.0751097	0.182499
NALCN	chr13	102068116	102069258	NM_052867	-	1	28534	0	0.0751097	#DIV/0!
GPC6	chr13	93879245	93880877	NM_005708	+	1	28692	7.20235	3.15461	0.437996
KHDRBS2	chr6	62995855	62996228	NM_152688	-	1	28806	0.0411563	0.0375548	0.912493
MGMT	chr10	131264948	131265710	NM_002412	+	1	31983	6.91426	7.99918	1.15691
FSCN1	chr7	5632335	5634555	NM_003088	+	1	34209	1.72857	1.72752	0.999397
NCAM2	chr21	22369423	22370582	NM_004540	+	1	34776	0.946595	0.150219	0.158694
RIPPLY2	chr6	84562820	84563758	NM_001009994	+	1	35145	0	0	#DIV/0!
HS3ST4	chr16	25702955	25704631	NM_006040	+	1	35229	0	0	#DIV/0!
STOX2	chr4	184826253	184828177	NM_020225	+	1	35824	1.02891	0.375548	0.364997
KCTD1	chr18	24235589	24237261	NM_001258222	-	1	36672	3.33366	4.20614	1.26172
COL5A1	chr9	137533359	137534397	NM_000093	+	1	40889	9.87751	11.2289	1.13681
MGARP	chr4	140201064	140201449	NM_032623	-	1	40920	0.0823126	0.0375548	0.456246
SLC43A3	chr11	57194340	57194650	NM_199329	-	1	166	5.22685	4.20614	0.804718
FAM155B	chrX	68723731	68726051	NM_015686	+	1	201	0.905439	0.150219	0.165908
FBXO27	chr19	39522264	39523227	NM_178820	-	1	1320	0.535032	0.112664	0.210575
FGF3	chr11	69632033	69634710	NM_005247	-	1	1586	0	0	#DIV/0!
NOX4	chr11	89224416	89224718	NM_016931	-	1	1949	0	0.187774	#DIV/0!
PIP4K2A	chr10	23002155	23003790	NM_005028	-	1	2003	10.7418	13.67	1.27259
LHX8	chr1	75600674	75601415	NM_001256114	+	1	2007	0	0	#DIV/0!
ZFP28	chr19	57049675	57050646	NM_020828	+	1	2247	4.2391	7.51097	1.77183
JAM3	chr11	133938850	133939681	NM_001205329	+	1	2795	6.91426	4.2437	0.61376
FERD3L	chr7	19184221	19184686	NM_152898	-	1	3098	0	0	#DIV/0!
PSD	chr10	104178528	104179548	NM_001270965	-	1	3278	0.164625	0.187774	1.14062
ITPRIPL1	chr2	96990857	96991283	NM_001163523	+	1	3687	0.493876	0.225329	0.456246
NPY2R	chr4	156129168	156130209	NM_000910	+	1	4675	0.123469	0	0
MEGF11	chr15	66544432	66546134	NM_032445	-	1	5213	0.699657	0.826206	1.18087
SHKBP1	chr19	41082615	41083355	NM_138392	+	1	5707	21.4013	16.6368	0.777373
ACSL6	chr5	131346892	131347776	NM_001205250	-	1	6212	0.452719	35.8649	79.2209
NRG2	chr5	139422076	139423150	NM_013981	-	1	6556	0.0411563	0	0
LMX1A	chr1	165324191	165326328	NM_001174069	-	1	6657	0.78197	0	0
LHCGR	chr2	48982621	48982958	NM_000233	-	1	8310	0	0	#DIV/0!
B4GALNT1	chr12	58025661	58027056	NM_001276468	-	1	8505	0.164625	0.150219	0.912493
ULK4P3	chr15	30395774	30396578	NR_026859	+	1	8838	0	0	#DIV/0!
ARHGAP36	chrX	130192131	130192735	NM_144967	+	1	10180	0.0823126	0	0
NOVA1	chr14	27066313	27066578	NM_002515	-	1	10245	2.88094	0.413103	0.143392
TBX5-AS1	chr12	114845861	114847650	NR_038440	+	1	11108	0	0	#DIV/0!
WTIP	chr19	34972054	34973645	NM_001080436	+	1	11110	0.205782	0.375548	1.82499
LBH	chr2	30453566	30455655	NM_030915	+	1	11163	2.79863	4.61924	1.65054
FGF13-AS1	chrX	137793095	137794010	NR_038405	+	1	11837	0.0411563	0.0751097	1.82499
ZNF418	chr19	58446336	58446800	NM_133460	-	1	11845	0.411563	0.150219	0.364997
MIR4321	chr19	2250560	2253959	NR_036207	+	1	12355	0	0	#DIV/0!
ELOVL5	chr6	53212617	53214043	NM_001242830	-	1	12558	2.71632	2.47862	0.912493
SORCS3	chr10	106399567	106402812	NM_014978	+	1	13135	0.0823126	0	0
RAB3C	chr5	57878725	57879177	NM_138453	+	1	13440	0.658501	0.225329	0.342185
COLGALT2	chr1	184005359	184006766	NM_015101	-	1	14159	0.246938	0.751097	3.04164
GOLGA8B	chr15	34874861	34876425	NR_027410	-	1	14276	14.2401	12.2429	0.859747
FGF13	chrX	137793095	137794010	NM_004114	-	1	14451	2.01666	0.751097	0.372446
KIRREL2	chr19	36347044	36348101	NM_199179	+	1	15042	0.0411563	0	0
AJAP1	chr1	4713989	4716555	NM_001042478	+	1	15182	0.0823126	0	0
PPP1R42	chr8	67940691	67940997	NM_001013626	-	1	15402	0	0	#DIV/0!
SLC1A2	chr11	35440375	35441882	NM_001195728	-	1	15622	0.246938	0.300439	1.21666
ANK1	chr8	41753340	41755250	NM_001142446	-	1	16466	0.370407	0.300439	0.811104
ZNF8	chr19	58789914	58790972	NM_021089	+	1	16673	2.22244	3.0795	1.38564
TTYH2	chr17	72208474	72208902	NM_032646	+	1	17383	1.68741	1.61486	0.957004
ULBP1	chr6	150284682	150286515	NM_025218	+	1	17858	0	0	#DIV/0!
EHD3	chr2	31456740	31457653	NM_014600	+	1	20316	1.52278	1.95285	1.28242
PDE4C	chr19	18335072	18337375	NM_001098818	-	1	20872	4.03332	2.02796	0.502802
MPP2	chr17	41984148	41985012	NM_005374	-	1	23238	0.987751	0.0751097	0.076041
MGC16275	chr17	72208474	72208902	NR_026914	-	1	23932	0.699657	1.46464	2.09337
NPPB	chr1	11919115	11919555	NM_002521	-	1	25920	0	0	#DIV/0!
VASH1	chr14	77227569	77228691	NM_014909	+	1	26556	4.52719	4.88213	1.0784
SYCP2L	chr6	10887184	10887622	NM_001040274	+	1	27550	0.0823126	0.0751097	0.912493
LRP2	chr2	170218314	170219203	NM_004525	-	1	28112	0	0	#DIV/0!
CSMD1	chr8	4848968	4852635	NM_033225	-	1	29622	0.288094	0.225329	0.782136
DRD2	chr11	113345068	113346328	NM_000795	-	1	30712	0.288094	1.50219	5.21424
HLX	chr1	221051966	221053673	NM_021958	+	1	33252	0.987751	0.413103	0.418226
ZNF329	chr19	58661737	58662287	NM_024620	-	1	33411	2.67516	1.80263	0.673841
INHBB	chr2	121101800	121104534	NM_002193	+	1	35733	0.0823126	1.01398	12.3186
MAP9	chr4	156297601	156298094	NM_001039580	-	1	36720	1.19353	1.20175	1.00689
CYP26A1	chr10	94833272	94835256	NM_000783	+	1	37519	0	0	#DIV/0!
VSTM2A	chr7	54609734	54610140	NM_182546	+	1	37808	3.25135	0.826206	0.254112
OTX2-AS1	chr14	57278709	57279116	NR_029385	+	1	39572	0	0	#DIV/0!
FBXL15	chr10	104178528	104179548	NM_024326	+	1	39680	12.1	3.98081	0.328994
NUDT11	chrX	51238706	51240104	NM_018159	-	1	40206	0.164625	0.337993	2.05311
CACNA1G	chr17	48636103	48639279	NM_198382	+	1	232	0	0	#DIV/0!
SLFN13	chr17	33775294	33775794	NM_144682	-	1	515	6.54385	0.938871	0.143474
MME	chr3	154797398	154797988	NM_000902	+	1	624	3.41597	6.2341	1.82499
NUP210	chr3	13460970	13462146	NM_024923	-	1	668	12.5527	9.50137	0.75692
EFCC1	chr3	128719865	128721245	NM_024768	+	1	996	2.34591	0.751097	0.320173
LOC285548	chr4	13548570	13549956	NR_015450	-	1	1070	0	0	#DIV/0!
HOXC9	chr12	54393374	54394648	NM_006897	+	1	1169	0	0	#DIV/0!
SLC30A10	chr1	220101132	220102147	NM_018713	-	1	1569	18.6027	0.262884	0.0141315
PCDH11Y	chrY	4867956	4868586	NM_032971	+	1	1727	1.48163	0	0
ATP8B2	chr1	154298205	154298544	NM_001005855	+	1	1886	0.740814	0.675987	0.912493
TMEM255A	chrX	119444859	119445272	NM_001104545	-	1	1889	0.699657	0.187774	0.26838
TSHZ3	chr19	31839635	31843049	NM_020856	-	1	2643	2.83979	1.31442	0.462859
T	chr6	166579973	166583423	NM_001270484	-	1	2985	0	0	#DIV/0!
CRHR2	chr7	30721372	30722445	NM_001202483	-	1	3737	0.123469	0.112664	0.912493
GAS1	chr9	89560584	89562647	NM_002048	-	1	4400	0	0.0751097	#DIV/0!
DBC1	chr9	122131086	122132214	NM_014618	-	1	4886	0.0411563	0.0751097	1.82499
MGC2889	chr3	192958709	192959373	NR_026877	+	1	5773	0	0	#DIV/0!
PEX5L	chr3	179754520	179755245	NM_001256752	-	1	5981	0	0.300439	#DIV/0!
FAM196A	chr10	128993505	128995167	NM_001039762	-	1	6576	1.76972	1.38953	0.785168
BEND5	chr1	49242371	49242810	NM_024603	-	1	6735	0.370407	0.262884	0.709716
FAM198A	chr3	43020702	43021354	NM_001129908	+	1	6939	0.288094	0.150219	0.521424
GNE	chr9	36258170	36258886	NM_005476	-	1	7100	192.653	94.2251	0.489093
CRTAC1	chr10	99789614	99791320	NM_018058	-	1	7437	0	0.0375548	#DIV/0!
EVC2	chr4	5709985	5710495	NM_001166136	-	1	7691	0.617345	0.262884	0.42583
RNF175	chr4	154680774	154681377	NM_173662	-	1	7823	0.0411563	0.112664	2.73748
TM6SF1	chr15	83775861	83776922	NM_023003	+	1	7843	1.39931	1.42708	1.01984
CHRDL1	chrX	110038946	110039370	NM_001143981	-	1	7994	10.1245	2.25329	0.222559
TMEM130	chr7	98467023	98468058	NM_001134451	-	1	8202	0.288094	0	0
NKAIN4	chr20	61884644	61886387	NM_152864	-	1	8383	0	0	#DIV/0!
LOC100506834	chr9	89560584	89562647	NR_049794	+	1	8662	0.0823126	0	0
SYT5	chr19	55690182	55691623	NM_003180	-	1	8933	0.0823126	0	0
IGF2BP1	chr17	47072820	47076042	NM_006546	+	1	9172	0	0	#DIV/0!
PCDH10	chr4	134069162	134070442	NM_032961	+	1	9484	0.123469	0	0
S1PR2	chr19	10340776	10342254	NM_004230	-	1	9565	1.56394	1.99041	1.27269
AMPH	chr7	38670439	38671008	NM_139316	-	1	10229	0.452719	0.187774	0.414769
TMEM108	chr3	132756985	132757895	NM_001136469	+	1	10350	0.288094	0	0
GSG1L	chr16	28073817	28075296	NM_001109763	-	1	10353	0.123469	0.0751097	0.608328
WNT2	chr7	116962841	116964803	NR_024047	-	1	10552	0	0.187774	#DIV/0!
ONECUT1	chr15	53080458	53083699	NM_004498	-	1	10946	0	0	#DIV/0!
C17orf102	chr17	32905965	32908951	NM_207454	-	1	10960	0	0	#DIV/0!
SFMBT2	chr10	7449376	7455339	NM_001029880	-	1	11282	4.48604	4.61924	1.02969
KIF1A	chr2	241758141	241760783	NM_001244008	-	1	11561	2.30475	0.0751097	0.032589
PLEKHH2	chr2	43864322	43864956	NM_172069	+	1	12340	3.78638	1.9153	0.505838
LMX1B	chr9	129372737	129378106	NM_001174146	+	1	12563	0	0	#DIV/0!
ZDHHC15	chrX	74742765	74743117	NM_144969	-	1	12589	0.370407	0.450658	1.21666
CACNA1H	chr16	1202414	1204624	NM_021098	+	1	12972	4.03332	1.68997	0.419002
GPX7	chr1	53067880	53068608	NM_015696	+	1	13513	0.535032	1.01398	1.89518
SNAP25	chr20	10198135	10198984	NM_003081	+	1	13708	1.56394	0	0
MIR2682	chr1	98510966	98511710	NR_039604	-	1	14757	0	0	#DIV/0!
DYNC1I1	chr7	95401691	95402432	NM_001135557	+	1	15323	0	0.225329	#DIV/0!
CHCHD5	chr2	113341684	113342453	NM_032309	+	1	15332	5.02107	5.4079	1.07704
MATK	chr19	3785511	3786653	NM_139354	-	1	15890	0.740814	0	0
FGF12	chr3	192125821	192127994	NM_021032	-	1	15987	0.0411563	0.0375548	0.912493
WDR86-AS1	chr7	151106244	151107808	NR_034012	+	1	16039	0	0.0751097	#DIV/0!
LOC644554	chr19	38307878	38308526	NR_040013	+	1	16433	0.123469	0.262884	2.12915
IGFBP5	chr2	217559039	217559484	NM_000599	-	1	17761	24.1176	7.66118	0.31766
CNTNAP2	chr7	145813030	145814084	NM_014141	+	1	18326	11.3591	6.00877	0.528981
CPXM2	chr10	125650820	125651373	NM_198148	-	1	18782	1.02891	0.488213	0.474496
KIAA2022	chrX	74143852	74145176	NM_001008537	-	1	19739	1.48163	0.112664	0.076041
EYA2	chr20	45523250	45524020	NM_005244	+	1	20216	4.65066	0.375548	0.0807516
NUDT10	chrX	51075272	51076331	NM_153183	+	1	21290	0.0411563	0	0
EMILIN3	chr20	39994545	39995810	NM_052846	-	1	22340	4.77413	4.16859	0.873161
HS3ST2	chr16	22824616	22826459	NM_006043	+	1	22364	0.123469	0.0751097	0.608328
KCNT2	chr1	196577708	196578011	NM_198503	-	1	22651	0.78197	0.225329	0.288156
HIC2	chr22	21770896	21772442	NM_015094	+	1	24096	8.4782	6.15899	0.72645
COL4A1	chr13	110958891	110960590	NM_001845	-	1	24332	10.8653	17.3128	1.59341
TMEM233	chr12	120031494	120033212	NM_001136534	+	1	24607	0	0.0375548	#DIV/0!
KIRREL3-AS3	chr11	126873091	126873809	NR_040078	+	1	24747	0	0	#DIV/0!
FADS2	chr11	61594996	61596710	NM_004265	+	1	25390	1.52278	1.38953	0.912493
CHAT	chr10	50817095	50817309	NM_020984	+	1	25531	0.164625	0.112664	0.684369
ADCY4	chr14	24803678	24804353	NM_001198592	-	1	25926	3.37482	2.10307	0.623166
EBF4	chr20	2672904	2674698	NM_001110514	+	1	26154	0.32925	0.413103	1.25468
FEZF2	chr3	62357639	62359774	NM_018008	-	1	26691	0	0	#DIV/0!
PCDHGC4	chr5	140864527	140864748	NM_032406	+	1	27695	0.905439	0.375548	0.414769
MIR4322	chr19	10340776	10342254	NR_036206	+	1	28061	0	0	#DIV/0!
SLC9A3	chr5	523676	524887	NM_004174	-	1	28790	3.37482	2.17818	0.645422
MSX2P1	chr17	56234321	56234827	NR_002307	+	1	29729	0	0.0375548	#DIV/0!
MEDAG	chr13	31480272	31481105	NM_032849	+	1	30110	0	0.150219	#DIV/0!
ZNF519	chr18	14132000	14132482	NR_033354	-	1	30409	0.411563	0.262884	0.638745
PTPRD	chr9	10612635	10613333	NM_002839	-	1	30842	39.8805	36.5033	0.915318
CCDC67	chr11	93063598	93064076	NM_181645	+	1	31592	0	0.262884	#DIV/0!
KCNH5	chr14	63512022	63512996	NM_172375	-	1	31630	0	0	#DIV/0!
MIR137	chr1	98510966	98511710	NR_029679	-	1	32575	0	0	#DIV/0!
FLJ16779	chr20	61884644	61886387	NR_024389	+	1	33305	0	0.0751097	#DIV/0!
ZNF385B	chr2	180725717	180726465	NM_152520	-	1	33854	0.0411563	0.0375548	0.912493
IGLON5	chr19	51815157	51815458	NM_001101372	+	1	34251	0	0	#DIV/0!
WDR86	chr7	151106244	151107808	NM_198285	-	1	34304	0.164625	0	0
NGB	chr14	77736733	77737772	NM_021257	-	1	35052	0.0823126	0	0
KIAA1217	chr10	23983366	23984978	NM_001098500	+	1	35360	87.5395	101.961	1.16475
COL4A2	chr13	110958891	110960590	NM_001846	+	1	35667	21.319	21.256	0.997048
ALOX15	chr17	4542715	4544934	NM_001140	-	1	35821	0.0411563	0.375548	9.12493
C15orf26	chr15	81426499	81426702	NM_173528	+	1	35884	0.0411563	0	0
NID2	chr14	52534581	52536722	NM_007361	-	1	36443	19.5904	34.7758	1.77514
CACNA1G-AS1	chr17	48636103	48639279	NR_038439	-	1	36506	0	0	#DIV/0!
ZNF75A	chr16	3355020	3356012	NM_153028	+	1	37277	5.76188	3.94326	0.684369
TMEM132E	chr17	32905965	32908951	NM_207313	+	1	37591	0.0411563	0.0751097	1.82499
MDGA1	chr6	37663761	37667102	NM_153487	-	1	39110	0.740814	0.225329	0.304164
HEY2	chr6	126068722	126071320	NM_012259	+	1	39813	0.123469	0.225329	1.82499
MIR1258	chr2	180725717	180726465	NR_031659	-	1	39870	0	0	#DIV/0!
DLX3	chr17	48070698	48072654	NM_005220	-	1	40336	0	0.938871	#DIV/0!
TIGD7	chr16	3355020	3356012	NM_033208	-	1	40956	2.30475	2.70395	1.1732
MIR124-3	chr20	61806254	61810867	NR_029670	+	1	41025	0	0	#DIV/0!
HRASLS	chr3	192958709	192959373	NM_020386	+	1	41054	0.0823126	0	0
STK33	chr11	8615397	8615889	NM_030906	-	1	6283	0.946595	1.27686	1.3489
MSRB3	chr12	65672391	65673250	NM_198080	+	1	7256	11.4415	4.28125	0.374188
KCNQ2	chr20	62102541	62103995	NM_004518	-	1	9592	0.0823126	0	0
PABPC5	chrX	90689602	90690119	NM_080832	+	1	15299	0.288094	0.0751097	0.260712
WDR72	chr15	54051655	54052004	NM_182758	-	1	16654	2.01666	0.0751097	0.0372446
MEGF10	chr5	126626053	126626901	NM_032446	+	1	19249	0.0823126	0.262884	3.19372
LOC339529	chr1	244080540	244081093	NR_033883	+	1	21983	0	0	#DIV/0!
NAT16	chr7	100823307	100823701	NM_198571	-	1	24674	0	0	#DIV/0!
SPHKAP	chr2	229045957	229046553	NM_001142644	-	1	25570	0.0411563	0	0
COL6A5	chr3	130064574	130064840	NR_022012	+	1	28562	0	0	#DIV/0!
SYT10	chr12	33591763	33593050	NM_198992	-	1	30927	0.617345	0.262884	0.42583
RCSD1	chr1	167599464	167599839	NM_052862	+	1	33740	6.2146	4.2437	0.682859
FBN2	chr5	127872563	127874945	NM_001999	-	1	40300	2.22244	2.06552	0.929391
CHST7	chrX	46433054	46434902	NM_019886	+	1	60	0.699657	0.488213	0.697788
GPRASP1	chrX	101906001	101907017	NM_001099411	+	1	500	2.88094	3.79304	1.3166
HOXC11	chr12	54366815	54369103	NM_014212	+	1	586	0	0	#DIV/0!
PAX3	chr2	223162946	223163912	NM_000438	-	1	723	0.0411563	0	0
IL17RD	chr3	57198243	57199378	NM_017563	-	1	756	3.2925	16.7495	5.08715
DKK3	chr11	12029737	12030841	NM_001018057	-	1	845	6.99657	11.3791	1.62638
FUT9	chr6	96463869	96464136	NM_006581	+	1	852	0.0411563	0.0751097	1.82499
FBLIM1	chr1	16085147	16085862	NM_017556	+	1	949	77.5796	15.4726	0.199441
RFX8	chr2	102090370	102091130	NM_001145664	-	1	1411	0	0	#DIV/0!
TLE4	chr9	82185479	82188560	NM_007005	+	1	1647	10.2891	19.9041	1.93448
FOXE1	chr9	100615234	100617510	NM_004473	+	1	2280	0	0	#DIV/0!
DUSP26	chr8	33456915	33457515	NM_024025	-	1	2630	0.411563	0.0751097	0.182499
MAF	chr16	79632619	79635537	NM_001031804	-	1	2743	8.97208	9.53893	1.06318
VSTM2B	chr19	30015781	30021367	NM_001146339	+	1	3692	0	0	#DIV/0!
FIGNL1	chr7	50517627	50518668	NM_001042762	-	1	3824	6.37923	7.73629	1.21273
SIX6	chr14	60975732	60978180	NM_007374	+	1	3871	0	0	#DIV/0!
EMX2OS	chr10	119301321	119305368	NR_002791	-	1	3990	0	0.0751097	#DIV/0!
CLDN10	chr13	96204691	96205496	NM_006984	+	1	4158	0	0	#DIV/0!
LOC283683	chr15	23115057	23115471	NR_040057	-	1	4323	0	0.0375548	#DIV/0!
EFTUD1P1	chr15	84748593	84749285	NR_036652	+	1	5229	0.987751	1.20175	1.21666
CHGB	chr20	5891878	5892417	NM_001819	+	1	5979	13.3758	0.413103	0.0308844
SORCS1	chr10	108923780	108924805	NM_001206572	-	1	6256	1.11122	0.0751097	0.067592
FAM20A	chr17	66596072	66597578	NM_001243746	-	1	6346	1.317	1.61486	1.22616
SLITRK2	chrX	144899363	144900266	NM_032539	+	1	6629	0.164625	0	0
BEX1	chrX	102318601	102319304	NM_018476	-	1	6685	0.411563	0	0
EDARADD	chr1	236558459	236559336	NM_145861	+	1	6736	14.5282	4.73191	0.325706
VAX2	chr2	71126720	71129209	NM_012476	+	1	6782	0.0411563	0	0
LINC00461	chr5	87973951	87974294	NR_024383	-	1	6815	0	0.0375548	#DIV/0!
SLC22A17	chr14	23821087	23822106	NM_020372	-	1	8046	0.864283	0.150219	0.173808
SLITRK4	chrX	142721410	142722958	NM_173078	-	1	8286	0.452719	0.262884	0.580677
UNC80	chr2	210636344	210636935	NM_182587	+	1	8417	0.288094	0.150219	0.521424
KHDC1	chr6	74019428	74020053	NM_001251874	-	1	8725	0.32925	0.638432	1.93905
EMX2	chr10	119301321	119305368	NM_001165924	+	1	8805	0	0	#DIV/0!
GFPT2	chr5	179779114	179781279	NM_005110	-	1	9027	0.205782	0.488213	2.37248
KCNC2	chr12	75602991	75603344	NM_139136	-	1	9120	0.123469	0.112664	0.912493
PTCHD4	chr6	48036137	48036410	NM_207499	-	1	9549	0	0.0375548	#DIV/0!
GPC3	chrX	133118960	133119990	NM_001164619	-	1	9608	0.699657	0.450658	0.644112
CMTM3	chr16	66638254	66639561	NR_037613	+	1	9637	1.93435	1.65241	0.854248
MORC2-AS1	chr22	31318228	31318489	NR_026920	+	1	9916	3.41597	3.4926	1.02243
NEUROG2	chr4	113435898	113438002	NM_024019	-	1	10119	0	0	#DIV/0!
LOC100130992	chr10	22540707	22542739	NR_038921	+	1	10603	1.11122	0.563322	0.50694
GAD2	chr10	26504383	26507434	NM_000818	+	1	10844	0.0411563	0	0
TMEM47	chrX	34674507	34675727	NM_031442	-	1	12033	8.31357	6.19655	0.745353
RAB31	chr18	9707752	9709311	NM_006868	+	1	12260	10.001	6.12144	0.612083
TOP3A	chr17	18217821	18219056	NM_004618	-	1	12511	7.61392	10.4402	1.37121
ATP6V0C	chr16	2563430	2564903	NM_001694	+	1	13243	98.0755	53.4405	0.544892
CRMP1	chr4	5894071	5895116	NM_001014809	-	1	13631	1.56394	0.751097	0.480259
LOC643542	chr18	65183237	65184014	NR_033921	+	1	13874	0	0	#DIV/0!
GABRB2	chr5	160974692	160975384	NM_021911	-	1	14965	5.76188	0.112664	0.0195534
MARCH4	chr2	217236025	217237129	NM_020814	-	1	15122	1.68741	0	0
GRIA3	chrX	122318752	122319149	NM_007325	+	1	15514	0.823126	1.42708	1.73374
PCP4L1	chr1	161228477	161229028	NM_001102566	+	1	15741	1.07006	0.225329	0.210575
SRRT	chr7	100472375	100473393	NM_015908	+	1	15748	18.9319	19.9416	1.05333
SYNM	chr15	99645030	99646444	NM_145728	+	1	15882	13.4993	6.2341	0.46181
TBKBP1	chr17	45771107	45772993	NM_014726	+	1	15903	0.905439	0.563322	0.622154
CA3	chr8	86350765	86351196	NM_005181	+	1	17109	0.617345	0.488213	0.790827
VGF	chr7	100806279	100809064	NM_003378	-	1	17301	0.164625	0.150219	0.912493
DSEL	chr18	65183237	65184014	NM_032160	-	1	17780	2.2636	2.29084	1.01204
PTH2R	chr2	209271337	209271987	NM_005048	+	1	17832	0.0823126	0	0
LOC100287314	chr12	30948548	30949757	NR_040245	+	1	18328	0	0.150219	#DIV/0!
DLC1	chr8	12990090	12990914	NM_006094	-	1	18647	4.85644	4.2437	0.873828
SPAG17	chr1	118727816	118728097	NM_206996	-	1	19244	0.0411563	0.187774	4.56246
FAM26F	chr6	116783067	116783678	NM_001010919	+	1	19893	0.617345	0.413103	0.669161
CYP4F22	chr19	15619223	15619613	NM_173483	+	1	20160	0.0411563	0.112664	2.73748
ACSS3	chr12	81471569	81472119	NM_024560	+	1	21119	0.411563	0.337993	0.821243
PTPRA	chr20	2852899	2854635	NM_080840	+	1	21267	21.2778	31.2832	1.47022
KIAA1751	chr1	1935166	1935452	NM_001080484	-	1	21455	0	0.0751097	#DIV/0!
CNGA3	chr2	98962873	98964187	NM_001298	+	1	23084	0.617345	0	0
INSM1	chr20	20344400	20350605	NM_002196	+	1	23171	3.41597	0.0375548	0.0109939
C4orf48	chr4	2042115	2044581	NM_001168243	+	1	23229	0.946595	4.88213	5.15757
CACNA1A	chr19	13616752	13617267	NM_001174080	-	1	24013	2.14013	0.0751097	0.0350959
SMCR8	chr17	18217821	18219056	NM_144775	+	1	24256	47.7413	47.2815	0.990369
FRMPD4	chrX	12156604	12157274	NM_014728	+	1	24531	0.246938	0	0
AASS	chr7	121783946	121784663	NM_005763	-	1	24552	3.33366	1.23931	0.371756
KCNJ12	chr17	21279506	21281574	NM_021012	+	1	24554	2.96325	0.337993	0.114062
STC2	chr5	172754056	172757098	NM_003714	-	1	25460	0.411563	0.150219	0.364997
PPAPDC1A	chr10	122216259	122217377	NM_001030059	+	1	25465	0	0	#DIV/0!
EXOC3L2	chr19	45737482	45738145	NM_138568	-	1	25741	0.123469	0.563322	4.56246
NEFL	chr8	24812946	24814299	NM_006158	-	1	26582	0.617345	0.788651	1.27749
MIR3150B	chr8	96085269	96085747	NR_037484	-	1	26822	0	0	#DIV/0!
CDO1	chr5	115151348	115152713	NM_001801	-	1	27580	0.164625	0.0751097	0.456246
VAMP5	chr2	85811340	85811855	NM_006634	+	1	28739	2.55169	0.938871	0.367941
TMEM181	chr6	158957220	158958677	NM_020823	+	1	28972	82.5184	73.7201	0.893378
TFAP2B	chr6	50787286	50788091	NM_003221	+	1	30441	0	0	#DIV/0!
FAM159B	chr5	63986189	63986974	NM_001164442	+	1	30904	0	0.112664	#DIV/0!
LOC389458	chr7	5111620	5112088	NR_015343	+	1	31292	0	0.337993	#DIV/0!
SIM1	chr6	100912071	100913337	NM_005068	-	1	31450	0	0	#DIV/0!
TBR1	chr2	162273294	162273725	NM_006593	+	1	31482	0	0	#DIV/0!
NKX2-4	chr20	21376358	21378245	NM_033176	-	1	31612	0	0	#DIV/0!
HCRTR2	chr6	55039170	55039392	NM_001526	+	1	31826	0	0	#DIV/0!
C14orf132	chr14	96505311	96506402	NM_001252507	+	1	31969	2.9221	2.06552	0.70686
CDK2AP1	chr12	123754049	123754373	NM_001270433	-	1	32895	36.1352	33.7618	0.934318
LOC284395	chr19	30015781	30021367	NR_040029	-	1	33457	0	0	#DIV/0!
MCC	chr5	112823256	112824304	NM_001085377	-	1	33478	4.60951	4.28125	0.928787
HOTAIR	chr12	54366815	54369103	NR_047517	-	1	33756	0	0	#DIV/0!
ADAMTS5	chr21	28337856	28340237	NM_007038	-	1	35332	0.617345	1.76508	2.85914
FIGLA	chr2	71017028	71017976	NM_001004311	-	1	35513	0	0	#DIV/0!
ZNF154	chr19	58220189	58220517	NM_001085384	-	1	35991	1.15238	1.61486	1.40133
CACNA1C-AS1	chr12	2800139	2801062	NR_045725	-	1	36391	0.164625	1.12664	6.84369
HOXC10	chr12	54378696	54380102	NM_017409	+	1	36791	0.0823126	0	0
BEND4	chr4	42152766	42154984	NM_001159547	-	1	37122	0.78197	1.01398	1.2967
C17orf82	chr17	59488115	59490485	NM_203425	+	1	37524	0	0	#DIV/0!
FGR	chr1	27960567	27961023	NM_005248	-	1	37725	0.535032	1.20175	2.24614
C6orf147	chr6	74019428	74020053	NR_027005	-	1	38140	0.576188	0.638432	1.10803
KCNK4	chr11	64058808	64060118	NM_033310	+	1	38428	0	0	#DIV/0!
SOX14	chr3	137482964	137484454	NM_004189	+	1	38805	0	0	#DIV/0!
PRAF2	chrX	48931423	48931954	NM_007213	-	1	38952	1.48163	0.713542	0.481593
GLDC	chr9	6645080	6645975	NM_000170	-	1	39153	0.0823126	0.0751097	0.912493
FOXF2	chr6	1389139	1391393	NM_001452	+	1	40223	3.37482	1.46464	0.43399
MIR3150A	chr8	96085269	96085747	NR_036105	+	1	40587	0	0	#DIV/0!
FOXD4L1	chr2	114256775	114258043	NM_012184	+	1	40653	0	0	#DIV/0!
EFHC2	chrX	44202712	44203014	NM_025184	-	1	1209	1.02891	0.413103	0.401497
PAK7	chr20	9819271	9819861	NM_177990	-	1	1521	0	0	#DIV/0!
NLGN4Y	chrY	16635739	16636047	NR_028319	+	1	1986	0.288094	0.0751097	0.260712
NEUROG3	chr10	71331926	71333392	NM_020999	-	1	1987	0.411563	0	0
PRDM12	chr9	133534534	133542394	NM_021619	+	1	2145	0	0	#DIV/0!
MMP2	chr16	55513220	55513526	NM_004530	+	1	2439	28.0686	24.298	0.865664
HECW2	chr2	197457392	197458522	NM_020760	-	1	3035	0.823126	1.38953	1.68811
FNDC1	chr6	159589636	159591319	NM_032532	+	1	3037	0.658501	0.375548	0.570308
FREM2	chr13	39261236	39262299	NM_207361	+	1	3649	0.946595	9.91447	10.4738
PTPRS	chr19	5339640	5341061	NM_130855	-	1	4892	4.28026	4.28125	1.00023
KLHL28	chr14	45431628	45432115	NM_017658	-	1	5699	14.1989	18.3268	1.29071
NRN1	chr6	6006689	6007043	NM_016588	-	1	5939	1.02891	0.600877	0.583995
GJA4	chr1	35258564	35258791	NM_002060	+	1	6019	0.740814	0.413103	0.557634
FAM19A4	chr3	68980783	68982035	NM_001005527	-	1	6306	0	0	#DIV/0!
BVES	chr6	105584148	105585621	NM_147147	-	1	6442	2.22244	0.413103	0.185878
DRGX	chr10	50602989	50606783	NM_001276451	-	1	6831	0.0823126	0	0
EMID1	chr22	29601547	29602291	NM_001267895	+	1	7817	0.658501	0.337993	0.513277
ADAM33	chr20	3662310	3663187	NM_025220	-	1	8336	2.34591	0.488213	0.208112
TRIM9	chr14	51560116	51562487	NM_052978	-	1	8410	0.32925	0	0
LDOC1	chrX	140270950	140271553	NM_012317	-	1	8760	1.56394	0.413103	0.264143
LEF1	chr4	109087747	109090407	NM_001166119	-	1	9479	0.576188	1.87774	3.2589
HSF4	chr16	67196792	67199988	NM_001040667	+	1	9536	2.42822	4.54413	1.87138
SLC4A11	chr20	3218578	3220930	NM_001174090	-	1	9856	0.493876	2.25329	4.56246
CBLN1	chr16	49314037	49316543	NM_004352	-	1	9895	0.288094	0.0751097	0.260712
NXPH2	chr2	139537692	139538650	NM_007226	-	1	10287	0	0	#DIV/0!
KCNA6	chr12	4918273	4919657	NM_002235	+	1	10308	1.11122	0.675987	0.608328
MIR124-1	chr8	9760750	9761643	NR_029668	-	1	10677	0	0	#DIV/0!
LINC00599	chr8	9760750	9761643	NR_024281	-	1	11496	0	0	#DIV/0!
IRAK3	chr12	66582695	66583345	NM_007199	+	1	12070	4.07447	3.04194	0.746585
PTH2	chr19	49925626	49926012	NM_178449	-	1	13029	0	0	#DIV/0!
LOC728739	chr12	108297426	108297743	NR_037629	-	1	13033	0.164625	0.337993	2.05311
TMEM155	chr4	122685860	122686565	NM_152399	-	1	13225	0	0	#DIV/0!
TMEM240	chr1	1474962	1475220	NM_001114748	-	1	13478	0	0	#DIV/0!
DTX1	chr12	113494389	113495534	NM_004416	+	1	14479	0.823126	1.95285	2.37248
FGF2	chr4	123747740	123748980	NM_002006	+	1	14503	4.73298	5.52056	1.1664
ANKRD6	chr6	90142751	90143635	NM_014942	+	1	14751	3.62176	4.28125	1.18209
FAM179B	chr14	45431628	45432115	NM_015091	+	1	15094	14.6928	15.4726	1.05307
TUBB4A	chr19	6502090	6502411	NM_006087	-	1	16425	0.905439	0.0751097	0.0829539
CPZ	chr4	8594412	8594777	NM_001014448	+	1	16567	0.32925	0.262884	0.798431
BVES-AS1	chr6	105584148	105585621	NR_037157	+	1	16622	0.0411563	0	0
PRDM13	chr6	100054686	100054988	NM_021620	+	1	16824	0	0.413103	#DIV/0!
MGAT5B	chr17	74864170	74866657	NM_144677	+	1	16891	0	0	#DIV/0!
DLGAP1	chr18	4453969	4455647	NM_004746	-	1	17636	0.164625	0.262884	1.59686
COL18A1	chr21	46824531	46826234	NM_130445	+	1	17779	3.70407	4.61924	1.24707
WTH3DI	chr2	132121263	132121762	NM_001077637	-	1	18701	16.7095	6.08388	0.364098
RTN4RL1	chr17	1927051	1929408	NM_178568	-	1	19205	0.246938	0	0
NR0B1	chrX	30326439	30327668	NM_000475	-	1	19881	0	0	#DIV/0!
AMER3	chr2	131513363	131514183	NM_001105193	+	1	20069	0.740814	0.150219	0.202776
GJA3	chr13	20735043	20736157	NM_021954	-	1	20880	0	0.0751097	#DIV/0!
LOC392232	chr8	73163618	73164191	NR_033867	-	1	21086	0.246938	0.826206	3.34581
LEF1-AS1	chr4	109087747	109090407	NR_029374	+	1	21396	0.246938	0.375548	1.52082
GDF6	chr8	97171805	97172022	NM_001001557	-	1	22042	0.0823126	0.112664	1.36874
ZFHX4-AS1	chr8	77594255	77594860	NR_024360	-	1	23364	0	0	#DIV/0!
GIPC3	chr19	3585357	3585947	NM_133261	+	1	24536	0.987751	0.863761	0.874472
DNM1P46	chr15	100346724	100347454	NR_003260	-	1	26670	0.123469	0.450658	3.64997
MX1	chr21	42798146	42798884	NM_002462	+	1	27780	9.17786	3.4926	0.380546
NTN1	chr17	8924167	8926920	NM_004822	+	1	29238	1.9755	0.976426	0.494267
SESN3	chr11	94965357	94965588	NM_001271594	-	1	30116	28.1509	156.679	5.56567
DYNLRB2	chr16	80574741	80575090	NM_130897	+	1	30173	0	0	#DIV/0!
ADAMTS14	chr10	72432242	72432738	NM_080722	+	1	30471	0.411563	0.450658	1.09499
CABP7	chr22	30116081	30117160	NM_182527	+	1	30888	3.12788	2.77906	0.88848
HLF	chr17	53342198	53343061	NM_002126	+	1	31172	6.95542	1.61486	0.232173
CYBRD1	chr2	172378822	172380189	NM_001256909	+	1	32183	23.1298	12.8438	0.555289
NRXN1	chr2	50574045	50574817	NM_138735	-	1	32501	1.27585	0.187774	0.147176
SLC6A17	chr1	110692988	110694264	NM_001010898	+	1	32780	0.164625	0	0
LOC441666	chr10	42862953	42863216	NR_024380	-	1	32789	1.317	2.06552	1.56835
RSPO2	chr8	109094485	109095849	NM_178565	-	1	32979	0.576188	0.225329	0.391068
CLDN5	chr22	19510871	19512254	NM_001130861	-	1	33814	3.49829	0.450658	0.128822
ZFHX4	chr8	77594255	77594860	NM_024721	+	1	34129	1.11122	0	0
RGAG4	chrX	71350941	71352137	NM_001024455	-	1	35920	0.905439	0.112664	0.124431
RHOF	chr12	122230903	122232359	NM_019034	-	1	36106	28.3567	3.56771	0.125815
DPYSL3	chr5	146888750	146889840	NM_001197294	-	1	36214	11.1945	12.1678	1.08694
PAX9	chr14	37126786	37128274	NM_006194	+	1	36549	0.246938	4.50658	18.2499
PP12613	chr4	122685860	122686565	NR_024365	+	1	36602	0	0	#DIV/0!
SYT9	chr11	7272757	7274235	NM_175733	+	1	2594	0.288094	0	0
MAFB	chr20	39316550	39319987	NM_005461	-	1	2688	3.08672	3.53015	1.14366
UNC13A	chr19	17798679	17799329	NM_001080421	-	1	19669	0.493876	0.112664	0.228123
MCHR2	chr6	100441406	100442152	NM_001040179	-	1	435	0	0	#DIV/0!
CD81	chr11	2398223	2399598	NM_004356	+	1	938	49.4287	70.9786	1.43598
ASTN1	chr1	177133392	177133846	NM_004319	-	1	1244	0.164625	0	0
SCARNA17	chr18	47339411	47340956	NR_003003	+	1	1452	0.205782	0.901316	4.37996
FOXD4L3	chr9	70917888	70919111	NM_199135	+	1	1719	0	0	#DIV/0!
CIDEA	chr18	12254147	12255089	NR_036468	+	1	1906	0.0823126	0	0
MMD2	chr7	4998405	4998950	NM_198403	-	1	2435	0	0	#DIV/0!
ACP5	chr19	11689417	11689768	NM_001111036	-	1	2497	5.43263	5.10746	0.940144
LTBP3	chr11	65325081	65326209	NM_021070	-	1	2499	4.85644	4.76946	0.982089
SLC9A5	chr16	67280023	67283152	NM_004594	+	1	2681	0.864283	0.450658	0.521424
C11orf95	chr11	63535652	63537435	NM_001144936	-	1	3185	5.67957	5.70833	1.00506
C14orf39	chr14	60951976	60952946	NM_174978	-	1	3435	0	0	#DIV/0!
CDIP1	chr16	4587836	4588890	NM_001199056	-	1	3619	8.10779	3.00439	0.370555
ZNF114	chr19	48775008	48775341	NM_153608	+	1	3948	0.164625	0.0375548	0.228123
KCND3	chr1	112531559	112533773	NM_004980	-	1	4231	0.699657	0.337993	0.483084
SLC5A7	chr2	108602824	108603467	NM_021815	+	1	4357	0.164625	0.112664	0.684369
FHL1	chrX	135228947	135230049	NM_001159702	+	1	4728	19.9608	9.27604	0.464713
CDC25A	chr3	48229077	48230285	NM_201567	-	1	4924	5.1857	7.02275	1.35425
CDKN1C	chr11	2905023	2907024	NM_001122631	-	1	5915	0.864283	0.375548	0.43452
ZCCHC13	chrX	73523919	73524125	NM_203303	+	1	6056	0	0	#DIV/0!
RSPO1	chr1	38099677	38100864	NM_001242910	-	1	6570	0.411563	0.225329	0.547496
CXCL12	chr10	44879714	44882391	NM_199168	-	1	6599	14.9809	5.33279	0.355972
GPR50	chrX	150343147	150344269	NM_004224	+	1	6932	0	0	#DIV/0!
SGIP1	chr1	66998728	66999060	NM_032291	+	1	7766	0.740814	0.488213	0.659022
TCERG1L	chr10	133109193	133111052	NM_174937	-	1	8044	0	0.112664	#DIV/0!
ONECUT3	chr19	1753216	1755606	NM_001080488	+	1	8304	0	0.150219	#DIV/0!
SLC7A5P1	chr16	29624387	29625391	NR_002593	-	1	8491	0.0823126	0	0
PPM1N	chr19	46001830	46002686	NM_001080401	+	1	9243	0.164625	1.84019	11.178
AJUBA	chr14	23449886	23452174	NM_032876	-	1	9368	1.27585	7.06031	5.53383
PODN	chr1	53527572	53528974	NM_001199080	+	1	9589	2.51054	3.30482	1.31638
PTGFR	chr1	78956624	78957516	NM_000959	+	1	9630	0.905439	1.5773	1.74203
GTF3A	chr13	27998586	27999178	NM_002097	+	1	9688	24.0764	41.1225	1.708
L3MBTL4	chr18	6413959	6414873	NM_173464	-	1	10390	2.30475	0.863761	0.374774
C7orf10	chr7	40173881	40175018	NM_024728	+	1	10393	2.05782	0.488213	0.237248
HBA2	chr16	222369	223447	NM_000517	+	1	11165	2.71632	0.450658	0.165908
RGCC	chr13	42030913	42032667	NM_014059	+	1	11371	0.987751	1.38953	1.40676
DNER	chr2	230578062	230579981	NM_139072	-	1	11420	0.164625	0.112664	0.684369
PTHLH	chr12	28123023	28123773	NM_198966	-	1	12341	0	0.0751097	#DIV/0!
BLVRA	chr7	43797823	43798802	NM_001253823	+	1	12891	2.05782	4.84457	2.35423
DGKZ	chr11	46354091	46355190	NM_201532	+	1	13105	1.76972	1.20175	0.679064
ESYT3	chr3	138153269	138154621	NM_031913	+	1	13262	0.32925	2.06552	6.27339
ESRRG	chr1	217310749	217311178	NM_001134285	-	1	14208	0.617345	0	0
COCH	chr14	31343355	31344757	NM_004086	+	1	14795	2.01666	1.35197	0.670403
JPH3	chr16	87636506	87637284	NM_001271604	+	1	15217	0.164625	0	0
CENPVP2	chrX	51424890	51425822	NR_033773	-	1	16035	0	0	#DIV/0!
LOC643355	chr1	112531559	112533773	NM_001270945	+	1	16121	0.0411563	0	0
LRRFIP1	chr2	238535561	238536840	NM_001137550	+	1	16859	154.954	95.0888	0.61366
FXYD7	chr19	35633409	35633697	NM_022006	+	1	17183	0	0.0375548	#DIV/0!
CPXM1	chr20	2780978	2781497	NM_019609	-	1	17693	0.205782	0.488213	2.37248
IRS4	chrX	107978210	107980145	NM_003604	-	1	17742	0	0	#DIV/0!
MRPS21	chr1	150266476	150266689	NM_031901	+	1	17757	14.2812	20.4674	1.43317
MTHFD1L	chr6	151186747	151188112	NM_001242767	+	1	17824	2.09897	6.04633	2.88061
CORO6	chr17	27949429	27950277	NM_032854	-	1	18193	0.123469	0.112664	0.912493
KIAA1211L	chr2	99552185	99553831	NM_207362	-	1	19271	5.96767	4.61924	0.774045
ROBO1	chr3	79067882	79068566	NM_001145845	-	1	19490	5.80304	6.08388	1.0484
CXCL6	chr4	74702420	74702627	NM_002993	+	1	21151	0.535032	0.150219	0.280767
SLC37A2	chr11	124932730	124933657	NM_001145290	+	1	21160	20.0843	1.46464	0.0729246
CMTM2	chr16	66612749	66613412	NM_001199317	+	1	21234	0.370407	0.375548	1.01388
ZNF483	chr9	114287380	114287695	NM_001007169	+	1	21250	0.535032	0.112664	0.210575
CCDC144B	chr17	18528376	18528714	NR_036647	-	1	21350	6.74964	1.08909	0.161355
PTGIS	chr20	48184193	48184833	NM_000961	-	1	21595	3.2925	1.35197	0.410622
C1QL2	chr2	119914126	119916663	NM_182528	-	1	22284	0	0	#DIV/0!
CENPVP1	chrX	51424890	51425822	NR_033772	-	1	22382	0	0	#DIV/0!
NR4A3	chr9	102581791	102587561	NM_173199	+	1	22811	0.123469	0.0751097	0.608328
EFNA4	chr1	155034925	155036578	NM_182690	+	1	22827	17.0387	12.2804	0.720737
EID2B	chr19	40022952	40023667	NM_152361	-	1	22938	0.0823126	0.0751097	0.912493
PER1	chr17	8054550	8055835	NM_002616	-	1	23655	7.32582	3.83059	0.522889
FHOD1	chr16	67280023	67283152	NM_013241	-	1	23763	9.7952	7.17297	0.732294
CCDC170	chr6	151814980	151815527	NM_025059	+	1	24562	0.535032	1.50219	2.80767
MEIS2	chr15	37390175	37390380	NM_172315	-	1	25301	1.81088	0.563322	0.311077
C19orf66	chr19	10196696	10197857	NM_018381	+	1	25669	10.3714	6.12144	0.590223
MPLKIP	chr7	40173881	40175018	NM_138701	-	1	25794	9.05439	7.84896	0.866868
SLC32A1	chr20	37352130	37357372	NM_080552	+	1	26217	0	0	#DIV/0!
RYR3	chr15	33602816	33604003	NM_001243996	+	1	27330	0.535032	0.826206	1.54422
TBX18	chr6	85472702	85474132	NM_001080508	-	1	27358	0.411563	0	0
IQCA1	chr2	237416090	237416382	NR_073043	-	1	27830	0.123469	0	0
ANPEP	chr15	90357402	90358573	NM_001150	-	1	28092	127.379	176.733	1.38746
HOXB-AS1	chr17	46620367	46621373	NR_102279	+	1	29361	0.78197	1.12664	1.44078
TFAP2A	chr6	10419399	10420323	NM_001042425	-	1	29473	0.32925	0.563322	1.71092
WWC3	chrX	9982513	9984583	NM_015691	+	1	30436	9.95983	10.3651	1.04069
LOC100505666	chr1	155034925	155036578	NR_040773	-	1	31023	1.85203	0.375548	0.202776
IRX4	chr5	1881924	1887743	NM_016358	-	1	31059	0	0	#DIV/0!
LOC728012	chr6	100441406	100442152	NR_038384	+	1	32251	0	0	#DIV/0!
GAS7	chr17	10101034	10102440	NM_201433	-	1	33974	10.2891	3.86815	0.375947
LINC00629	chrX	133683174	133685463	NR_038998	+	1	35953	0	0	#DIV/0!
SOX7	chr8	10587304	10591109	NM_031439	-	1	36263	0.823126	1.08909	1.32311
IGF1R	chr15	99190446	99194559	NM_000875	+	1	36721	54.7791	93.6993	1.7105
FAM184B	chr4	17782642	17783624	NM_015688	-	1	37495	1.68741	3.11705	1.84724
ADCY8	chr8	132052203	132054749	NM_001115	-	1	38469	0	0	#DIV/0!
EN2	chr7	155246390	155251955	NM_001427	+	1	38476	0	0	#DIV/0!
ACAA2	chr18	47339411	47340956	NM_006111	-	1	39664	121.905	132.381	1.08593
NGF	chr1	115880167	115881332	NM_002506	-	1	39925	0.0823126	0	0
MIR935	chr19	54485303	54486322	NR_030632	+	1	40185	0	0	#DIV/0!
HFM1	chr1	91869876	91870390	NM_001017975	-	1	40322	0.452719	0.112664	0.248862
ETV7	chr6	36355277	36356016	NM_001207039	-	1	567	0.658501	0.563322	0.855462
PFKP	chr10	3108650	3111419	NM_002627	+	1	1568	43.7492	29.3679	0.671279
GRASP	chr12	52400467	52401696	NM_181711	+	1	2010	0.823126	0.337993	0.410622
GSTM1	chr1	110230238	110230614	NM_146421	+	1	2589	12.0176	1.99041	0.165624
HIST2H2AC	chr1	149857769	149859470	NM_003517	+	1	2754	6.09113	9.95203	1.63385
DCLRE1C	chr10	14995680	14996431	NM_001033855	-	1	3386	6.33807	7.02275	1.10803
ALPL	chr1	21835548	21836344	NM_001177520	+	1	3527	0.905439	0.375548	0.414769
CACNA1D	chr3	53527927	53530106	NM_001128839	+	1	4094	6.54385	19.4158	2.96704
CAMK2B	chr7	44364432	44365328	NM_172078	-	1	5057	0.658501	0	0
FLT4	chr5	180075688	180076906	NM_182925	-	1	5073	0.370407	0.0751097	0.202776
HIST2H2AB	chr1	149857769	149859470	NM_175065	-	1	6141	5.96767	4.16859	0.698529
ZNF300	chr5	150284385	150284635	NM_001172831	-	1	7179	2.67516	0.0751097	0.0280767
NPM2	chr8	21882245	21882883	NM_182795	+	1	13354	0.576188	1.31442	2.28123
GOLGA8A	chr15	34728787	34729495	NR_027409	-	1	13622	8.4782	1.42708	0.168324
PEBP1	chr12	118573730	118574731	NM_002567	+	1	14205	73.8756	49.1217	0.664925
EML1	chr14	100259160	100259542	NM_001008707	+	1	15866	3.41597	2.02796	0.59367
POLR2M	chr15	57998704	57999385	NM_001018102	+	1	16854	22.1421	27.0019	1.21948
SLC35F3	chr1	234040298	234041457	NM_173508	+	1	17232	0	0	#DIV/0!
RBFA	chr18	77793336	77793925	NM_024805	+	1	18398	4.36257	10.3276	2.36732
FAM218A	chr4	165878036	165878446	NM_153027	+	1	24891	1.07006	0.150219	0.140383
ATP9B	chr18	76828638	76829796	NM_198531	+	1	29008	8.60167	8.63761	1.00418
C2orf40	chr2	106681982	106682403	NM_032411	+	1	31698	1.35816	0.488213	0.359467
HPCA	chr1	33351686	33352397	NM_002143	+	1	35574	10.1245	3.11705	0.307874
CPQ	chr8	97657174	97657943	NM_016134	+	1	36069	8.97208	5.22012	0.581819
C10orf53	chr10	50887565	50887862	NM_182554	+	1	36333	0	0	#DIV/0!
HIST2H2BE	chr1	149857769	149859470	NM_003528	-	1	38377	43.5022	10.628	0.24431
HMX1	chr4	8872820	8873023	NM_018942	-	1	39191	0	0	#DIV/0!
NUDT16P1	chr3	131080578	131081191	NR_027766	+	1	290	17.8618	15.2848	0.855725
ZC3H11A	chr1	203764568	203765293	NM_014827	+	1	512	81.4895	94.15	1.15536
TM2D3	chr15	102192165	102193345	NM_025141	-	1	539	7.61392	10.3276	1.35641
ASIC2	chr17	32484007	32484280	NM_001094	-	1	861	0.123469	0.0751097	0.608328
HIST1H4F	chr6	26240697	26240951	NM_003540	+	1	1260	0	0	#DIV/0!
STK32B	chr4	5053230	5054092	NM_018401	+	1	1338	0.123469	0.150219	1.21666
SNAP91	chr6	84417597	84419378	NM_001242792	-	1	1975	0.246938	0	0
CPPED1	chr16	12897365	12897889	NM_001099455	-	1	2087	9.67173	6.04633	0.625154
GPR75	chr2	54086776	54087266	NM_006794	-	1	2274	0.864283	1.42708	1.65118
AP3M2	chr8	42009723	42011098	NM_001134296	+	1	2515	6.29692	8.71272	1.38365
CD47	chr3	107809375	107810543	NM_198793	-	1	3002	41.2386	53.3279	1.29315
LECT1	chr13	53313127	53314045	NM_007015	-	1	3280	0.32925	0.0375548	0.114062
GPR158-AS1	chr10	25463756	25465639	NR_027333	-	1	3404	0	0.187774	#DIV/0!
KLHL30	chr2	239048071	239048454	NM_198582	+	1	3887	0	0.150219	#DIV/0!
LOC146513	chr16	86320175	86321055	NR_038438	+	1	4041	0	0	#DIV/0!
PPP1R3B	chr8	9008058	9009353	NM_001201329	-	1	4451	37.905	19.0403	0.502317
ZFYVE28	chr4	2366421	2367092	NM_001172660	-	1	4479	7.73739	1.31442	0.169879
LTK	chr15	41803443	41805531	NM_002344	-	1	5021	5.67957	0.938871	0.165307
EIF4E3	chr3	71802560	71804209	NM_173359	-	1	5489	65.9324	38.2684	0.580418
ARSG	chr17	66255192	66255556	NM_014960	+	1	6034	1.07006	0.450658	0.42115
PLTP	chr20	44539729	44540099	NM_006227	-	1	6038	26.9985	20.918	0.774784
MRPL28	chr16	419860	420256	NM_006428	-	1	6347	8.02548	5.03235	0.627046
DNAAF3	chr19	55677520	55678216	NM_001256714	-	1	6458	0.0823126	0.112664	1.36874
HIST1H2BB	chr6	26044203	26044469	NM_021062	-	1	6566	0.0823126	0.0751097	0.912493
ZNF783	chr7	148958858	148959891	NM_001195220	+	1	6780	3.45713	4.39391	1.27097
LOC100499489	chr10	22725491	22726764	NR_036533	-	1	7400	0.987751	0.262884	0.266144
GALNT13	chr2	154727906	154728271	NM_052917	+	1	7773	0.123469	0	0
ZNF518B	chr4	10458129	10459353	NM_053042	-	1	9049	12.7173	4.13103	0.324836
MTNR1B	chr11	92702789	92703434	NM_005959	+	1	9116	0.0823126	0.375548	4.56246
MIR4634	chr5	174178214	174178928	NR_039777	+	1	9340	0	0	#DIV/0!
PNMAL1	chr19	46974557	46975073	NM_018215	-	1	9848	0.32925	0.450658	1.36874
CYP24A1	chr20	52789252	52790986	NM_001128915	-	1	9967	0	0.262884	#DIV/0!
KIT	chr4	55523409	55525297	NM_001093772	+	1	10175	13.3758	14.4586	1.08095
AATK	chr17	79139501	79140028	NM_001080395	-	1	10213	2.22244	2.3284	1.04768
HPDL	chr1	45792419	45793301	NM_032756	+	1	10289	5.96767	1.20175	0.201378
SHOX	chrX	584563	585326	NM_006883	+	1	10295	0.0823126	0	0
C17orf96	chr17	36829692	36831500	NM_001130677	-	1	10581	0.123469	1.08909	8.82076
CRIP3	chr6	43276419	43276659	NM_206922	-	1	11136	0.164625	0	0
FOXD4L6	chr9	69200368	69201591	NM_001085476	-	1	11895	0	0	#DIV/0!
SLC6A4	chr17	28562387	28563186	NM_001045	-	1	13275	0.452719	0.450658	0.995446
EPDR1	chr7	37960316	37961046	NM_001242948	+	1	13413	8.51936	10.4402	1.22547
SEPT9	chr17	75368688	75370506	NM_001113493	+	1	13659	43.8726	31.3583	0.714757
VLDLR	chr9	2621308	2623685	NM_003383	+	1	13732	19.0142	4.2437	0.223185
FAM135B	chr8	139508795	139509774	NM_015912	-	1	13863	1.44047	0.225329	0.156427
EPHB6	chr7	142551879	142553186	NM_004445	+	1	14772	0.740814	0.187774	0.25347
LOC100190940	chr12	130526915	130527117	NR_024457	-	1	15040	0.0823126	0.0751097	0.912493
DNM1P35	chr15	76030564	76031664	NR_024595	-	1	16912	0.164625	0.0751097	0.456246
GPR75-ASB3	chr2	54086776	54087266	NM_001164165	-	1	17160	3.33366	4.05592	1.21666
BCLAF1	chr6	136610148	136611285	NM_001077441	-	1	18390	91.5728	104.553	1.14174
HSPA12B	chr20	3713159	3713515	NM_052970	+	1	18660	0.535032	0.262884	0.491342
NPAS4	chr11	66188130	66189397	NM_178864	+	1	18862	0	0	#DIV/0!
OR2L13	chr1	248100325	248100726	NM_175911	+	1	18933	0.0823126	0	0
FLJ35024	chr9	2621308	2623685	NR_015375	-	1	19245	0.493876	0.0375548	0.076041
LOC729911	chr15	79576059	79576270	NR_038997	-	1	19926	0	0	#DIV/0!
ZFP37	chr9	115818836	115819343	NM_003408	-	1	20232	0.164625	0.788651	4.79059
VAX1	chr10	118895963	118898037	NM_001112704	-	1	20382	0	0	#DIV/0!
ZNF214	chr11	7041072	7041949	NM_013249	-	1	20529	1.02891	2.29084	2.22648
FRMD8	chr11	65153726	65154606	NM_031904	+	1	20630	9.30133	5.93366	0.637937
NLRP14	chr11	7041072	7041949	NM_176822	+	1	20785	0.0823126	0.0751097	0.912493
RYBP	chr3	72495853	72496852	NM_012234	-	1	20828	31.0319	32.4474	1.04561
C7orf41	chr7	30174230	30176169	NM_152793	+	1	21035	12.0588	19.4534	1.61321
SLC41A1	chr1	205781870	205783010	NM_173854	-	1	21324	6.99657	8.22451	1.17551
TRIM58	chr1	248020330	248021252	NM_015431	+	1	21636	6.74964	0.150219	0.0222559
DLEC1	chr3	38080628	38081187	NM_007337	+	1	21812	2.79863	1.9153	0.684369
OVOL1	chr11	65553749	65555573	NM_004561	+	1	21943	37.2876	16.4866	0.442146
FHIT	chr3	61236606	61237227	NM_002012	-	1	22339	2.59285	2.55373	0.984913
HERC5	chr4	89378223	89378948	NM_016323	+	1	22508	1.39931	1.08909	0.778302
PLA2G16	chr11	63381143	63382096	NM_007069	-	1	22567	2.01666	14.8717	7.37443
EN1	chr2	119605200	119605620	NM_001426	-	1	22725	0	0	#DIV/0!
SLC34A2	chr4	25657119	25657547	NM_001177999	+	1	23148	0.0823126	0	0
TPBGL	chr11	74951647	74953491	NM_001195528	+	1	23371	0	0	#DIV/0!
COL26A1	chr7	101005899	101007443	NM_133457	+	1	23518	0	0.0751097	#DIV/0!
SLC25A39	chr17	42402787	42403266	NM_016016	-	1	23740	80.7898	79.3158	0.981755
PRSS27	chr16	2770137	2770500	NM_031948	-	1	24937	0.164625	0.0751097	0.456246
LRRC71	chr1	156890243	156890806	NM_144702	+	1	25072	0.123469	0	0
DENND6B	chr22	50765047	50766109	NM_001001794	-	1	25141	1.48163	1.53975	1.03923
CCDC180	chr9	100069890	100070351	NM_020893	+	1	26167	0.617345	0.675987	1.09499
PARP6	chr15	72564442	72565165	NM_020214	-	1	26214	7.69623	13.67	1.77619
CPLX2	chr5	175298515	175300066	NM_001008220	+	1	26405	1.44047	0.337993	0.234641
GSX1	chr13	28365545	28365785	NM_145657	+	1	27286	0	0	#DIV/0!
GPR158	chr10	25463756	25465639	NM_020752	+	1	27558	0.246938	0.450658	1.82499
NPFFR2	chr4	72897564	72897964	NM_004885	+	1	27714	0	0	#DIV/0!
NDUFA4L2	chr12	57631932	57634578	NM_020142	-	1	27728	0.164625	0.337993	2.05311
ITGA5	chr12	54811981	54812202	NM_002205	-	1	27944	6.13229	3.0795	0.502177
HTR4	chr5	148033472	148034080	NM_000870	-	1	28419	1.07006	0.0375548	0.0350959
CDH15	chr16	89237944	89238331	NM_004933	+	1	28588	0.0823126	0.0375548	0.456246
DLX6	chr7	96634622	96634915	NM_005222	+	1	28623	0	0	#DIV/0!
NR2F6	chr19	17355181	17356471	NM_005234	-	1	29949	59.8413	23.96	0.400392
AKAP10	chr17	19880676	19881633	NM_007202	-	1	30031	13.3758	13.0691	0.977069
CERS4	chr19	8273530	8273920	NM_024552	+	1	30808	0.452719	0.525768	1.16135
KCNH2	chr7	150652807	150653080	NM_172057	-	1	30847	3.5806	2.14063	0.59784
TULP1	chr6	35479388	35479678	NM_003322	-	1	31085	0	0.187774	#DIV/0!
CR1L	chr1	207818389	207818952	NM_175710	+	1	31269	0	0	#DIV/0!
PHACTR3	chr20	58152280	58152847	NM_001199505	+	1	31613	0.617345	0.0751097	0.121666
TRHDE-AS1	chr12	72665683	72667551	NR_026837	-	1	31643	0.164625	0	0
PEAR1	chr1	156863415	156863711	NM_001080471	+	1	33225	2.14013	0.751097	0.350959
AATK-AS1	chr17	79139501	79140028	NR_027255	+	1	33621	0	0	#DIV/0!
PM20D1	chr1	205818898	205819191	NM_152491	-	1	33837	0.123469	0.112664	0.912493
SMC1B	chr22	45809191	45809953	NM_148674	-	1	33864	0.0823126	0.187774	2.28123
FLJ34208	chr3	194207385	194208785	NR_033929	+	1	34063	0.205782	0	0
GPR27	chr3	71802560	71804209	NM_018971	+	1	34646	0.0823126	0.112664	1.36874
TRHDE	chr12	72665683	72667551	NM_013381	+	1	34992	2.88094	8.18695	2.84176
SHANK2	chr11	70508328	70508617	NM_133266	-	1	35102	20.4135	31.5461	1.54535
LINC00839	chr10	42971195	42971834	NR_026827	+	1	35492	0.0411563	0.488213	11.8624
SH3BP2	chr4	2794494	2794875	NM_001122681	+	1	35597	29.3856	22.8709	0.778302
OR1M1	chr19	9204246	9204490	NM_001004456	+	1	35878	0	0	#DIV/0!
TFR2	chr7	100230649	100231320	NM_001206855	-	1	36507	0.370407	0.525768	1.41943
NLGN2	chr17	7311672	7312063	NM_020795	+	1	36554	1.68741	0.901316	0.534142
FRAT1	chr10	99078811	99081048	NM_005479	+	1	36883	5.43263	3.68037	0.677457
ALX3	chr1	110610265	110613303	NM_006492	-	1	37069	0.493876	0.337993	0.684369
FLJ39639	chr16	3313946	3314789	NR_033904	+	1	37352	1.11122	0.150219	0.135184
GPR149	chr3	154146347	154146965	NM_001038705	-	1	37506	0	0	#DIV/0!
SLCO2A1	chr3	133747920	133748266	NM_005630	-	1	37512	109.887	22.7958	0.207447
TSLP	chr5	110408704	110409039	NM_138551	+	1	37752	0.32925	1.08909	3.30779
PLEC	chr8	145027911	145028352	NM_201379	-	1	38485	188.455	94.9386	0.503774
PF4V1	chr4	74719087	74719339	NM_002620	+	1	38745	0.205782	0	0
DIRC3	chr2	218621279	218621498	NR_026597	-	1	38853	0.205782	0	0
RIBC2	chr22	45809191	45809953	NM_015653	+	1	39633	0.576188	0.187774	0.32589
ITPKB	chr1	226924560	226926553	NM_002221	-	1	41003	6.37923	4.46902	0.700559

## Sheet: 4_IIa EpiG. inactivated genes
Total number of genes hypermethylated in LST #4	711
Hypermethylated in LST #4 but silent in normal	163
Epigenetically inactivated in LST #4	263
Symbol	Chr	Start	End	Gene ID	Strand	CpG	Pos	4_N_Xprn	4_IIa_Xprn	4_IIa_FC
WNT3A	chr1	228194096	228196512	NM_033131	+	1	2669	0	0	#DIV/0!
ZSCAN18	chr19	58609338	58609988	NM_023926	-	1	7127	3.51826	0.742995	0.211182
PPP1R16B	chr20	37434206	37435592	NM_001172735	+	1	7347	2.49982	2.03346	0.813443
MYH10	chr17	8533004	8534933	NM_005964	-	1	8729	8.74937	3.36303	0.384374
ADARB2	chr10	1778784	1780018	NM_018702	-	1	10524	0.0462929	0.07821	1.68946
GRIN2C	chr17	72855621	72858012	NM_000835	-	1	17310	0	0	#DIV/0!
AKR1B1	chr7	134143115	134144063	NM_001628	-	1	17430	7.45316	4.26244	0.571897
OLIG1	chr21	34442206	34444543	NM_138983	+	1	29187	0.0925859	0	0
ZNF568	chr19	37406931	37407463	NM_001204837	+	1	31	1.62025	1.25136	0.772324
ELMOD1	chr11	107461743	107462648	NM_001130037	+	1	4313	0	0	#DIV/0!
PCDHGC3	chr5	140855386	140856620	NM_032402	+	1	4378	4.67559	1.36867	0.292728
TRPC4	chr13	38443682	38444228	NM_001135956	-	1	5602	0.185172	0.117315	0.633547
ZNF829	chr19	37406931	37407463	NM_001171979	-	1	8315	0.972152	0.664785	0.683828
NTNG1	chr1	107682889	107684463	NM_001113228	+	1	10680	0.185172	0	0
CHST11	chr12	104850253	104852395	NM_018413	+	1	12802	6.11067	4.84902	0.793533
ZNF625	chr19	12266998	12267686	NM_145233	-	1	14753	1.75913	0	0
SSTR2	chr17	71160922	71162350	NM_001050	+	1	15525	1.43508	0.15642	0.108997
ZNF804B	chr7	88388488	88389283	NM_181646	+	1	19698	0	0	#DIV/0!
RFTN1	chr3	16554327	16555413	NM_015150	-	1	21724	5.04593	4.37976	0.867978
GPR12	chr13	27334226	27335205	NM_005288	-	1	22906	0.509222	0	0
SDC2	chr8	97505747	97507607	NM_002998	+	1	23304	10.8325	9.30699	0.859169
LOC643923	chr11	107461743	107462648	NR_028328	+	1	24284	0	0	#DIV/0!
ZNF625-ZNF20	chr19	12266998	12267686	NR_037802	-	1	25043	4.99964	2.50272	0.50058
ZNF331	chr19	54023868	54024560	NM_018555	+	1	27082	4.583	0.821205	0.179185
RASSF2	chr20	4803013	4804146	NM_014737	-	1	37980	7.73092	5.20096	0.672748
CLSTN2	chr3	139653430	139655115	NM_022131	+	1	257	0.694394	0.195525	0.281576
ZNF304	chr19	57862441	57863236	NM_020657	+	1	1849	3.70344	1.21225	0.327332
FLI1	chr11	128562671	128565011	NM_001271010	+	1	2185	3.88861	3.01108	0.774335
UST	chr6	149068179	149069775	NM_005715	+	1	2804	3.24051	1.44688	0.4465
LIFR	chr5	38556222	38557563	NM_001127671	-	1	3473	14.3045	3.79318	0.265174
PTPRZ1	chr7	121513046	121513911	NM_001206838	+	1	4248	0.601808	0	0
ZNF43	chr19	22034394	22034943	NM_001256653	-	1	5346	9.8604	0.93852	0.0951807
MMP16	chr8	89339965	89340481	NM_005941	-	1	5778	0.416636	0.195525	0.469294
TLL1	chr4	166794545	166795341	NM_012464	+	1	5989	2.03689	0.86031	0.422364
FAM5B	chr1	177140120	177140323	NM_021165	+	1	7155	0	0.039105	#DIV/0!
MIR4500HG	chr13	88323569	88324640	NR_033829	-	1	7193	0	0	#DIV/0!
ZNF813	chr19	53970802	53971473	NM_001004301	+	1	8938	5.36998	2.11167	0.393236
LPPR4	chr1	99729982	99730335	NM_014839	+	1	10461	0.509222	0	0
TNFSF11	chr13	43148277	43149282	NM_003701	+	1	10623	0.78698	2.65914	3.37892
EYA4	chr6	133562086	133563586	NM_172105	+	1	13910	0	0	#DIV/0!
PTF1A	chr10	23480697	23482455	NM_178161	+	1	15025	0	0	#DIV/0!
CLVS2	chr6	123317164	123317753	NM_001010852	+	1	18214	0	0	#DIV/0!
ZBTB8B	chr1	32930500	32931061	NM_001145720	+	1	18983	0.0925859	0	0
FLI1-AS1	chr11	128562671	128565011	NR_038908	-	1	19059	0.0925859	0	0
DFNA5	chr7	24796541	24797487	NM_004403	-	1	19777	0.277758	0.31284	1.12631
CD38	chr4	15779998	15780729	NM_001775	+	1	20063	0.509222	0.508365	0.998316
C11orf96	chr11	43963626	43966048	NM_001145033	+	1	21017	0.555515	0.273735	0.492759
TMEM178B	chr7	140772358	140774560	NM_001195278	+	1	21176	0.324051	5.63112	17.3773
FOXB1	chr15	60296135	60298520	NM_012182	+	1	21251	0	0	#DIV/0!
RORA	chr15	61520423	61521716	NM_134261	-	1	22240	11.2492	7.66458	0.681345
PHACTR3	chr20	58179808	58180787	NM_080672	+	1	22691	0.462929	0	0
METTL24	chr6	110678854	110679108	NM_001123364	-	1	23434	0.555515	0	0
ELOVL4	chr6	80656744	80657593	NM_022726	-	1	23502	0.416636	0.508365	1.22016
SYT2	chr1	202678881	202679769	NM_177402	-	1	23744	4.90705	1.95525	0.398457
USP44	chr12	95941906	95942979	NM_001042403	-	1	26268	0.138879	0.273735	1.97103
GRID2	chr4	93226348	93227007	NM_001510	+	1	26812	0	0	#DIV/0!
TENM4	chr11	79148358	79152200	NM_001098816	-	1	27067	0.833273	0.664785	0.7978
SLITRK5	chr13	88323569	88324640	NM_015567	+	1	27769	1.66655	0.039105	0.0234647
CD70	chr19	6590340	6591072	NM_001252	-	1	27785	0	0	#DIV/0!
MIR3650	chr5	38556222	38557563	NR_037423	-	1	28115	0.0462929	0.039105	0.844729
ZNF660	chr3	44626325	44626794	NM_173658	+	1	30770	0.370344	0.23463	0.633547
SPOCK3	chr4	168155005	168155765	NM_001204356	-	1	1970	0	0	#DIV/0!
CCDC169	chr13	36871667	36872059	NM_001144981	-	1	4168	0	0	#DIV/0!
AUTS2	chr7	69062374	69065037	NM_015570	+	1	5889	32.6828	60.4954	1.85099
NDRG4	chr16	58497033	58498595	NM_020465	+	1	6437	1.38879	1.05583	0.760256
ST8SIA1	chr12	22486835	22488666	NM_003034	-	1	17986	0.694394	0.742995	1.06999
ZNF790-AS1	chr19	37288342	37288723	NR_040027	+	1	22263	0.324051	0.117315	0.362027
ADHFE1	chr8	67344497	67344989	NM_144650	+	1	34465	2.40723	0.273735	0.113714
CCDC169-SOHLH2	chr13	36871667	36872059	NM_001198910	-	1	36160	0	0	#DIV/0!
NPAS1	chr19	47522904	47525190	NM_002517	+	1	37302	0.0925859	0.23463	2.53419
CRH	chr8	67089249	67089962	NM_000756	-	1	44	0	0	#DIV/0!
JAM2	chr21	27011624	27012398	NM_001270407	+	1	356	6.11067	3.32392	0.543954
EMBP1	chr1	121260857	121261525	NR_003955	+	1	1082	0.694394	0.039105	0.0563153
RAB39A	chr11	107798958	107799980	NM_017516	+	1	16969	1.24991	0.351945	0.281576
AP3B2	chr15	83378007	83379068	NM_004644	-	1	20175	0.185172	0	0
TFPI2	chr7	93519366	93520184	NM_006528	-	1	20972	0.416636	0.07821	0.187718
LOC285084	chr2	175190866	175192123	NR_038897	+	1	26768	0	0	#DIV/0!
CDH4	chr20	59826977	59828978	NM_001794	+	1	30806	0	0.07821	#DIV/0!
KIF5C	chr2	149632682	149633882	NM_004522	+	1	30839	21.2948	0.7821	0.0367273
MPPED2	chr11	30606004	30608128	NM_001145399	-	1	34677	0.0925859	0	0
AK5	chr1	77747314	77748224	NM_012093	+	1	4834	1.06474	0.31284	0.293819
ARHGAP20	chr11	110581839	110583883	NM_001258418	-	1	7247	2.36094	0.508365	0.215323
LMO1	chr11	8284102	8285032	NR_073006	-	1	11639	0	0	#DIV/0!
GPM6A	chr4	176923075	176923630	NM_001261447	-	1	15495	0.185172	0.07821	0.422364
TIAM1	chr21	32929927	32932017	NM_003253	-	1	17647	6.94394	1.5642	0.225261
NSG1	chr4	4387593	4389919	NM_001040101	+	1	24158	1.66655	0.7821	0.469294
LRRN1	chr3	3840513	3842772	NM_020873	+	1	25971	1.01844	2.77645	2.72617
ANO5	chr11	22214172	22215320	NM_001142649	+	1	36956	16.9895	0.70389	0.0414308
EMB	chr5	49736607	49737300	NM_198449	-	1	23537	15.4618	2.81556	0.182097
HCK	chr20	30639908	30640786	NM_001172130	+	1	12799	6.38843	5.35738	0.838608
CSMD2	chr1	34628783	34630976	NM_052896	-	1	39041	0.231465	0.39105	1.68946
KLHL14	chr18	30349690	30352302	NM_020805	-	1	870	0.0925859	0.15642	1.68946
RGMA	chr15	93631428	93633173	NM_020211	-	1	2186	2.17577	0.430155	0.197703
NR3C1	chr5	142782071	142785071	NM_001204263	-	1	3124	39.6731	8.09473	0.204036
NGFR	chr17	47572345	47575316	NM_002507	+	1	6027	0.416636	0.07821	0.187718
ADD2	chr2	70994447	70995385	NM_001185054	-	1	6554	0.462929	0.15642	0.337892
PREX1	chr20	47443734	47445181	NM_020820	-	1	7124	9.62893	5.5138	0.572629
NRCAM	chr7	108095401	108097206	NM_001193584	-	1	8318	1.20362	1.6033	1.33207
FGF5	chr4	81187494	81187913	NM_033143	+	1	9306	0	0	#DIV/0!
IGSF9B	chr11	133825337	133827457	NM_014987	-	1	11533	0.925859	1.52509	1.64722
VCAN	chr5	82768387	82769268	NM_001126336	+	1	11873	12.0362	8.56399	0.711522
NLGN4X	chrX	6144120	6145906	NM_181332	-	1	12137	3.98119	0.430155	0.108047
ZNF549	chr19	58038572	58039208	NM_153263	+	1	14933	2.82387	0.977625	0.3462
FBXL7	chr5	15500076	15500923	NM_012304	+	1	16931	5.09222	2.73735	0.537555
FAM150A	chr8	53477544	53478627	NM_207413	-	1	18203	0.0925859	0	0
HELT	chr4	185939222	185942747	NM_001029887	+	1	20061	0	0	#DIV/0!
PTPRM	chr18	7566557	7568830	NM_001105244	+	1	20266	9.2123	5.16186	0.560323
B3GAT1	chr11	134281380	134282919	NM_054025	-	1	21123	0.277758	0.117315	0.422364
TACR1	chr2	75426592	75428030	NM_015727	-	1	21623	0.138879	0	0
DPF1	chr19	38719089	38720627	NM_001135156	-	1	22695	0	0.039105	#DIV/0!
LONRF2	chr2	100937779	100939059	NM_198461	-	1	25536	1.11103	0	0
ZNF788	chr19	12203028	12203503	NR_027049	+	1	29128	0.694394	0.273735	0.394207
PDGFD	chr11	104034536	104035058	NM_033135	-	1	30124	8.05497	3.51945	0.436929
EPHB1	chr3	134514085	134515980	NM_004441	+	1	32758	0	0.62568	#DIV/0!
ZNF773	chr19	58011124	58011743	NM_198542	+	1	32889	1.24991	0.664785	0.531866
ZNF529	chr19	37063892	37064749	NM_020951	-	1	35434	2.91646	3.63676	1.24698
MVB12A	chr19	17530650	17531535	NM_138401	+	1	37307	2.91646	3.44124	1.17994
EGFLAM	chr5	38257825	38259136	NM_001205301	+	1	87	0.601808	0.15642	0.259917
LOC100127983	chr8	91997230	91997906	NM_001190972	-	1	812	0.416636	0.039105	0.0938588
ZEB1	chr10	31607227	31610094	NM_001174093	+	1	1522	15.1378	15.2118	1.00489
XKR5	chr8	6691833	6693135	NM_207411	-	1	2548	0.0462929	0	0
NRG1	chr8	32405407	32406901	NM_001160002	+	1	2668	1.15732	0.117315	0.101367
DKK2	chr4	107956555	107957453	NM_014421	-	1	4793	0	0.195525	#DIV/0!
ZNF492	chr19	22817274	22817546	NM_020855	+	1	5085	0.509222	0	0
ZNF134	chr19	58125530	58125902	NM_003435	+	1	5682	4.62929	0.62568	0.135157
ELMO1	chr7	37487354	37488672	NM_001206480	-	1	6195	6.94394	3.87139	0.557521
PAX2	chr10	102503913	102506146	NM_003989	+	1	8008	0	0.117315	#DIV/0!
SUSD5	chr3	33259919	33260763	NM_015551	-	1	8054	0	0.15642	#DIV/0!
ZNF415	chr19	53635625	53636230	NM_018355	-	1	10041	3.14792	0.351945	0.111802
NBLA00301	chr4	174450046	174451469	NR_003679	+	1	10233	0.0925859	0	0
TCF4	chr18	53257018	53257309	NM_001243227	-	1	10642	15.2767	12.0443	0.788414
VAT1L	chr16	77822375	77823134	NM_020927	+	1	11048	2.68499	4.02781	1.50012
FAM19A5	chr22	48884884	48887043	NM_001082967	+	1	14404	0.231465	0.430155	1.8584
ZNF543	chr19	57831599	57832250	NM_213598	+	1	14495	1.66655	1.01673	0.610082
LPHN2	chr1	82265998	82269048	NM_012302	+	1	14841	13.5638	4.18423	0.308485
ZNF530	chr19	58111229	58111770	NM_020880	+	1	14912	0.925859	1.40778	1.52051
CCBE1	chr18	57363714	57365001	NM_133459	-	1	15278	0.555515	0.15642	0.281576
CNRIP1	chr2	68546339	68547111	NM_001111101	-	1	16062	1.06474	0.742995	0.69782
UNC5C	chr4	96469456	96469667	NM_003728	-	1	17009	8.42532	1.64241	0.194937
SHISA3	chr4	42399152	42400802	NM_001080505	+	1	18945	0.185172	0.15642	0.844729
NIM1	chr5	43191974	43193155	NR_072980	+	1	19378	0.324051	0.273735	0.844729
TCF24	chr8	67873388	67875600	NM_001193502	-	1	20186	0	0	#DIV/0!
ANKLE1	chr19	17392383	17393775	NM_152363	+	1	21428	0.0925859	0	0
PDE1C	chr7	32110063	32110910	NM_001191056	-	1	21944	2.31465	1.29046	0.557521
MSC	chr8	72755783	72756667	NM_005098	-	1	22224	0.740687	1.13404	1.53107
PTPRO	chr12	15475318	15475901	NM_002848	+	1	23986	13.6101	1.87704	0.137915
CD40	chr20	44746822	44747060	NM_001250	+	1	24282	1.15732	1.25136	1.08125
HAND2	chr4	174450046	174451469	NM_021973	-	1	27086	0.0925859	0	0
ZEB1-AS1	chr10	31607227	31610094	NR_024284	-	1	27605	1.11103	3.1284	2.81576
MEIS1-AS3	chr2	66660452	66660794	NR_046438	-	1	28483	0.0925859	0	0
LOC100132891	chr8	72755783	72756667	NR_033651	+	1	29289	4.07378	6.33501	1.55507
MYO3A	chr10	26222921	26224022	NM_017433	+	1	29819	2.5924	0.039105	0.0150844
PALM2	chr9	112402767	112403349	NM_001037293	+	1	30195	0.138879	0.742995	5.34995
LOC100652791	chr8	6691833	6693135	NR_045217	+	1	30565	0.0462929	0	0
ABCC8	chr11	17497463	17498626	NM_000352	-	1	30734	1.11103	0.430155	0.387167
C9orf50	chr9	132382432	132383004	NM_199350	-	1	35594	0.185172	0.39105	2.11182
TMEM163	chr2	135475698	135476993	NM_030923	-	1	36266	0.601808	0.195525	0.324896
ZNF781	chr19	38182793	38183327	NM_152605	-	1	36829	0.601808	0.07821	0.129958
LRRC3B	chr3	26664104	26664796	NM_052953	+	1	37161	0.462929	0	0
KCNIP4	chr4	21950085	21950346	NM_147182	-	1	16103	2.12948	1.05583	0.495819
BCAT1	chr12	25101607	25102073	NM_001178092	-	1	2345	1.57396	0.508365	0.322985
ZNF610	chr19	52839444	52839937	NM_001161425	+	1	13366	0.509222	0.508365	0.998316
BMP3	chr4	81951941	81952808	NM_001201	+	1	38996	42.358	1.95525	0.0461601
SLC47A1	chr17	19436788	19437692	NM_018242	+	1	291	0.833273	0.586575	0.703941
PPFIA2	chr12	82152320	82152674	NM_003625	-	1	474	2.73128	0.508365	0.186127
PPP2R2B	chr5	146257346	146258575	NM_001271948	-	1	717	0.740687	0.23463	0.316773
STAC2	chr17	37380953	37382363	NM_198993	-	1	1459	0	0	#DIV/0!
NCAM1	chr11	112832524	112834490	NM_001242607	+	1	1750	4.35154	2.69824	0.620067
SELV	chr19	40005648	40005869	NM_182704	+	1	1890	0	0	#DIV/0!
APBB1	chr11	6439863	6440732	NR_047512	-	1	2570	1.43508	0.273735	0.190745
ZNF790	chr19	37328896	37329518	NM_001242802	-	1	4101	1.9443	0.586575	0.301689
SYT6	chr1	114695136	114696672	NM_001270805	-	1	5132	0.185172	0	0
LOC285484	chr4	6200912	6202724	NR_037863	+	1	6950	0	0	#DIV/0!
ST8SIA4	chr5	100238722	100239138	NM_175052	-	1	9409	2.49982	0.7821	0.312863
KAZN	chr1	14924610	14925993	NM_201628	+	1	10304	2.31465	1.68151	0.726467
LOC401463	chr8	65488536	65489116	NR_015374	-	1	11502	0	0	#DIV/0!
BTG4	chr11	111383168	111383892	NM_017589	-	1	11667	0	0	#DIV/0!
MIR129-2	chr11	43602545	43603215	NR_029697	+	1	12439	0	0	#DIV/0!
LHFPL3	chr7	103968783	103969959	NM_199000	+	1	12983	0.0925859	0.195525	2.11182
NTRK3	chr15	88799522	88801017	NM_001012338	-	1	13345	0.231465	0	0
RIC3	chr11	8190226	8190671	NM_001206672	-	1	13993	0.972152	0.07821	0.0804504
JAKMIP1	chr4	6200912	6202724	NM_144720	-	1	14168	0.0462929	0	0
ZDHHC22	chr14	77605885	77608304	NM_174976	-	1	15552	0.370344	0	0
VTN	chr17	26698359	26699557	NM_000638	-	1	15707	0	0.039105	#DIV/0!
CCDC177	chr14	70041213	70041662	NM_001271507	-	1	15740	0	0	#DIV/0!
UBE2QL1	chr5	6448753	6449629	NM_001145161	+	1	16640	0.555515	0	0
KATNAL2	chr18	44526866	44527137	NM_031303	+	1	16683	1.85172	1.29046	0.696901
GPR88	chr1	101004471	101005885	NM_022049	+	1	17676	0.0462929	0	0
TBC1D30	chr12	65218245	65219143	NM_015279	+	1	20431	4.49042	4.84902	1.07986
ASCL1	chr12	103351579	103352695	NM_004316	+	1	20632	0.648101	0	0
SLFN11	chr17	33700487	33700760	NM_001104588	-	1	20838	3.98119	2.50272	0.628635
TMEFF2	chr2	193058995	193060812	NM_016192	-	1	21860	0.277758	0	0
SVEP1	chr9	113341213	113342029	NM_153366	-	1	22870	3.19421	4.88812	1.53031
ZNF264	chr19	57702696	57703425	NM_003417	+	1	24039	21.341	12.2399	0.573536
DPY19L2P4	chr7	89747892	89749036	NR_003551	+	1	24706	0	0.195525	#DIV/0!
RNF150	chr4	142053327	142054601	NM_020724	-	1	25969	1.3425	0.273735	0.2039
ZNF606	chr19	58513455	58514498	NM_025027	-	1	26959	4.76817	1.09494	0.229635
HDGFRP3	chr15	83875648	83877079	NM_016073	-	1	28271	5.78662	1.48599	0.256798
MIR34C	chr11	111383168	111383892	NR_029840	+	1	28387	0	0	#DIV/0!
B3GAT2	chr6	71665360	71667132	NM_080742	-	1	28975	3.56456	6.41322	1.79916
VWC2	chr7	49813008	49815752	NM_198570	+	1	30518	0.0462929	0	0
ADAMTS1	chr21	28216558	28218117	NM_006988	-	1	30814	13.3324	2.18988	0.164253
LOC100288974	chr10	81664389	81665076	NR_033857	+	1	31451	0.462929	0.664785	1.43604
SARM1	chr17	26698359	26699557	NM_015077	+	1	32692	10.4159	13.1784	1.26522
PTX3	chr3	157155267	157155826	NM_002852	+	1	33204	0.648101	0.39105	0.603378
ZKSCAN7	chr3	44596535	44597018	NM_025169	+	1	34032	0.370344	0.117315	0.316773
WNT1	chr12	49371690	49375550	NM_005430	+	1	34574	0.138879	0.15642	1.12631
GREB1L	chr18	18821383	18823349	NM_001142966	+	1	35835	0.138879	0.039105	0.281576
ROR2	chr9	94711117	94713075	NM_004560	-	1	38019	2.12948	1.29046	0.606001
CTNND2	chr5	11903550	11904703	NM_001332	-	1	38302	2.31465	0.07821	0.0337892
RPRM	chr2	154334449	154335458	NM_019845	-	1	38395	0.0462929	0.07821	1.68946
GPR139	chr16	20084707	20085305	NM_001002911	-	1	38687	0	0	#DIV/0!
LOC100128398	chr19	58513455	58514498	NR_036508	+	1	39015	0.879566	0.195525	0.222297
GSX2	chr4	54966163	54968063	NM_133267	+	1	39524	0	0	#DIV/0!
ZSWIM2	chr2	187713846	187714069	NM_182521	-	1	39779	0	0	#DIV/0!
MIR34B	chr11	111383168	111383892	NR_029839	+	1	39987	0	0	#DIV/0!
HAND1	chr5	153857038	153859113	NM_004821	-	1	84	0	0	#DIV/0!
C1orf51	chr1	150254365	150254637	NM_144697	+	1	142	0.648101	1.17315	1.81013
GSTM2	chr1	110210581	110210956	NM_000848	+	1	656	4.90705	2.50272	0.510025
LOC100289092	chr16	28890954	28891868	NR_046288	-	1	848	0.0462929	0	0
NELL1	chr11	20690579	20691845	NM_006157	+	1	1164	0.185172	0.31284	1.68946
GUCY1A3	chr4	156588297	156589292	NM_000856	+	1	1508	2.03689	3.08929	1.51667
CNTN1	chr12	41086522	41087102	NM_001256063	+	1	2826	2.45353	0.07821	0.0318766
CD34	chr1	208084098	208084513	NM_001773	-	1	3329	5.32369	3.1675	0.594983
GRIA4	chr11	105481126	105481422	NR_046356	+	1	5269	0.972152	0.586575	0.603378
ZNF730	chr19	23299727	23300167	NM_001277403	+	1	5275	0.601808	0.31284	0.519833
ITGA4	chr2	182321761	182323029	NM_000885	+	1	5482	9.35117	6.84337	0.73182
PCDH11X	chrX	91033993	91034623	NM_032967	+	1	6575	0.185172	0	0
ADAMTS19	chr5	128795503	128797417	NM_133638	+	1	6659	0.324051	0	0
DPYSL5	chr2	27070302	27072922	NM_001253723	+	1	6984	0	0	#DIV/0!
CELF2	chr10	11207178	11207980	NM_001025076	+	1	7006	33.6087	49.9371	1.48584
DYDC2	chr10	82116202	82117120	NM_001270041	+	1	7013	0.185172	0	0
SPG20	chr13	36919737	36921004	NM_001142295	-	1	7389	10.5548	1.75972	0.166723
LOC146880	chr17	62774366	62777797	NR_026899	-	1	7642	8.79566	16.4241	1.8673
KCNQ5	chr6	73330942	73333109	NM_001160134	+	1	7657	0.462929	0.07821	0.168946
NEUROG1	chr5	134870740	134872051	NM_006161	-	1	8356	0	0	#DIV/0!
ESR1	chr6	152128822	152129771	NM_000125	+	1	9101	0.185172	0.039105	0.211182
EFEMP1	chr2	56150340	56151180	NM_001039348	-	1	9720	11.2492	6.37411	0.566629
C12orf42	chr12	103889148	103889843	NM_001099336	-	1	10214	0	0	#DIV/0!
SYNDIG1	chr20	24449844	24452037	NM_024893	+	1	12482	0.138879	0.07821	0.563153
IGF2BP3	chr7	23508184	23509712	NM_006547	-	1	12691	0.416636	0.15642	0.375435
ALX1	chr12	85673878	85674700	NM_006982	+	1	13688	0	0.039105	#DIV/0!
GPR37	chr7	124404700	124406189	NM_005302	-	1	20953	0.138879	0.31284	2.25261
SPG20OS	chr13	36919737	36921004	NR_045181	+	1	22067	0	0	#DIV/0!
DYDC1	chr10	82116202	82117120	NM_138812	-	1	22733	0	0	#DIV/0!
CUX2	chr12	111471061	111471578	NM_015267	+	1	22787	0	0	#DIV/0!
DOK5	chr20	53091733	53092993	NM_018431	+	1	25525	0.601808	0.273735	0.454854
FAM72D	chr1	143912736	143916156	NM_207418	-	1	26199	0.78698	0.430155	0.546589
GLB1L3	chr11	134145559	134147180	NM_001080407	+	1	28190	0.0462929	0.07821	1.68946
FOXG1	chr14	29234889	29235908	NM_005249	+	1	31840	0	0	#DIV/0!
TBX5	chr12	114843022	114843610	NM_181486	-	1	38184	0	0.15642	#DIV/0!
DNAH11	chr7	21582443	21583313	NM_001277115	+	1	1909	4.95334	5.74843	1.16052
ZNF550	chr19	58070553	58071273	NM_001277092	-	1	6594	1.48137	1.36867	0.923922
C16orf45	chr16	15528350	15529086	NM_033201	+	1	16725	1.43508	1.01673	0.708482
SFRP2	chr4	154709512	154710827	NM_003013	-	1	23606	0.185172	0.62568	3.37892
DMRT3	chr9	976162	977828	NM_021240	+	1	30731	0	0	#DIV/0!
ICAM1	chr19	10380287	10381965	NM_000201	+	1	36233	7.26799	7.821	1.07609
ALX4	chr11	44330542	44331761	NM_021926	-	1	38249	0.185172	0.23463	1.26709
VEGFC	chr4	177713243	177714457	NM_005429	-	1	40970	0.694394	0.46926	0.675783
LOC440461	chr17	66192363	66195873	NR_027283	+	1	345	0.0925859	0.07821	0.844729
EGR2	chr10	64574660	64578778	NM_000399	-	1	424	3.14792	1.6033	0.509322
HLTF-AS1	chr3	148803904	148804557	NR_046648	+	1	504	0.231465	0.39105	1.68946
NELL2	chr12	45269830	45270835	NM_001145108	-	1	520	4.44412	1.44688	0.325573
BAIAP3	chr16	1382916	1384735	NM_001199099	+	1	1129	3.88861	4.45797	1.14642
PDE4DIP	chr1	145039740	145040180	NM_001198832	-	1	2103	45.1819	26.0439	0.576424
BDNF	chr11	27743472	27744564	NM_170731	-	1	2500	0.324051	0.508365	1.56878
ZNF547	chr19	57874763	57875110	NM_173631	+	1	2894	0.78698	0.664785	0.844729
WNT5A	chr3	55520226	55522344	NM_003392	-	1	3082	5.36998	7.31263	1.36176
GSC	chr14	95234612	95236569	NM_173849	-	1	3482	0	0	#DIV/0!
DYSF	chr2	71680558	71681276	NM_001130978	+	1	3922	2.26835	1.48599	0.655096
ZNF528	chr19	52900955	52901158	NM_032423	+	1	4161	3.37938	1.68151	0.49758
FAM133A	chrX	92928546	92928786	NM_001171110	+	1	4582	0	0	#DIV/0!
TNPO2	chr19	12831793	12832225	NM_013433	-	1	4661	22.0817	25.692	1.16349
BAALC	chr8	104152726	104153390	NM_024812	+	1	5674	0.370344	0.39105	1.05591
ZNF542	chr19	56879417	56879995	NR_024057	+	1	6043	5.55515	0.821205	0.147828
TWIST1	chr7	19156050	19158042	NM_000474	-	1	6414	0.185172	0.07821	0.422364
CBLN2	chr18	70208974	70211790	NM_182511	-	1	9112	1.9906	0.15642	0.0785794
SEMA6D	chr15	47476369	47477499	NM_001198999	+	1	9151	73.6521	5.86575	0.0796413
FEZ1	chr11	125365137	125366319	NM_022549	-	1	9535	0.185172	0.117315	0.633547
PXDN	chr2	1746833	1748971	NM_012293	-	1	9818	9.30488	8.36847	0.899363
SYT3	chr19	51142284	51142986	NM_032298	-	1	10172	0	0	#DIV/0!
MIR4281	chr5	176056520	176057494	NR_036239	-	1	10380	0	0	#DIV/0!
NKX2-5	chr5	172661486	172662228	NM_004387	-	1	10739	0	0	#DIV/0!
SHISA9	chr16	12994574	12997690	NM_001145205	+	1	10927	0.0462929	0	0
DDN	chr12	49390617	49392441	NM_015086	-	1	10945	0	0.07821	#DIV/0!
LEPR	chr1	65991001	65991811	NM_001198687	+	1	11381	4.81447	5.63112	1.16962
LAYN	chr11	111410932	111412199	NM_001258390	+	1	11566	0.601808	0.821205	1.36456
FAM72A	chr1	206135444	206138863	NM_001123168	+	1	12023	0.740687	0.93852	1.26709
ST3GAL1	chr8	134581969	134584875	NM_003033	-	1	12820	5.2774	1.95525	0.370495
AMOTL1	chr11	94501366	94502696	NM_130847	+	1	12904	7.82351	2.3463	0.299904
GATA4	chr8	11559596	11562956	NM_002052	+	1	12974	0.0462929	0	0
UTF1	chr10	135043221	135044560	NM_003577	+	1	13827	0	0	#DIV/0!
ADCY1	chr7	45613386	45615504	NM_021116	+	1	14153	2.17577	0.273735	0.125811
COL12A1	chr6	75914705	75916387	NM_080645	-	1	14369	13.2398	37.0715	2.80001
FAM43B	chr1	20878894	20880592	NM_207334	+	1	14696	0	0	#DIV/0!
RASGRF1	chr15	79381804	79384209	NM_001145648	-	1	15199	0.0462929	0.508365	10.9815
RIMS2	chr8	104510870	104513913	NM_001100117	+	1	15686	1.66655	0	0
DGKG	chr3	186078710	186080111	NM_001080745	-	1	16177	0.972152	2.65914	2.73531
GMPPA	chr2	220361462	220363254	NM_013335	+	1	16232	18.7023	13.413	0.717183
EIF4E1B	chr5	176056520	176057494	NM_001099408	+	1	16775	0	0	#DIV/0!
C20orf201	chr20	62714763	62715761	NM_001007125	-	1	16916	0	0	#DIV/0!
TRAPPC2P1	chr19	57874763	57875110	NR_002166	+	1	18175	4.35154	3.51945	0.808783
KIF26A	chr14	104601959	104605672	NM_015656	+	1	18532	1.52767	0.195525	0.127989
VSX2	chr14	74706188	74708192	NM_182894	+	1	18836	0	0	#DIV/0!
EPHA7	chr6	94126272	94129677	NM_004440	-	1	18947	5.97179	1.21225	0.202997
C8orf56	chr8	104152726	104153390	NR_027071	-	1	19026	0	0	#DIV/0!
PTCHD2	chr1	11538669	11540342	NM_020780	+	1	19057	0	0.15642	#DIV/0!
SH3GL3	chr15	84115762	84116921	NR_026799	+	1	19099	0	0	#DIV/0!
HLTF	chr3	148803904	148804557	NM_003071	-	1	19726	11.2492	18.4967	1.64427
ZNF570	chr19	37959852	37960615	NM_144694	+	1	19996	3.42568	1.32957	0.388119
DCLK1	chr13	36705040	36705707	NM_004734	-	1	20197	0.0925859	0	0
KY	chr3	134369464	134370242	NM_178554	-	1	20507	0.0462929	0	0
CRISPLD1	chr8	75896528	75897116	NM_031461	+	1	21573	0.416636	0	0
INSC	chr11	15136058	15136545	NM_001042536	+	1	21644	0.879566	1.52509	1.73392
ZNF334	chr20	45142000	45142337	NR_073026	-	1	22309	2.17577	0.117315	0.0539189
TRIM71	chr3	32858194	32860506	NM_001039111	+	1	22967	0	0	#DIV/0!
GFRA1	chr10	118030732	118034230	NM_001145453	-	1	23282	5.41627	2.81556	0.519833
LOC400043	chr12	54519768	54520457	NR_026656	+	1	23302	0.416636	0.273735	0.657011
WNT6	chr2	219723702	219725010	NM_006522	+	1	24077	0	0	#DIV/0!
PCDH9	chr13	67804593	67805459	NM_020403	-	1	24421	2.77758	0	0
EPHA6	chr3	96532023	96533625	NM_001080448	+	1	25427	0.0462929	0	0
FBN1	chr15	48936810	48938577	NM_000138	-	1	25667	9.67522	9.81535	1.01448
HIF3A	chr19	46800053	46800603	NM_152795	+	1	26433	0.185172	0.07821	0.422364
ARRDC2	chr19	18117908	18118305	NM_015683	+	1	26697	4.90705	4.6926	0.956297
VIM	chr10	17270430	17272617	NM_003380	+	1	26726	100.178	62.7244	0.62613
TMEM196	chr7	19812569	19813005	NM_152774	-	1	27615	0	0	#DIV/0!
OPRL1	chr20	62714763	62715761	NM_001200019	+	1	28890	0.0462929	0.07821	1.68946
HOXC4	chr12	54447744	54448091	NM_153633	+	1	29020	0	0.117315	#DIV/0!
ZNF229	chr19	44952416	44952809	NM_014518	-	1	29836	0.601808	0.15642	0.259917
DAB1	chr1	58715272	58716095	NM_021080	-	1	30816	0.0925859	0.07821	0.844729
SNCB	chr5	176056520	176057494	NM_003085	-	1	31146	0	0	#DIV/0!
ROBO3	chr11	124735069	124736465	NM_022370	+	1	31537	0.509222	0.23463	0.460761
SLC16A12	chr10	91294947	91295925	NM_213606	-	1	32404	0.555515	0	0
KIRREL	chr1	157963540	157963947	NM_018240	+	1	32472	2.6387	1.25136	0.474234
PHF21B	chr22	45403036	45406372	NM_001242450	-	1	33190	0	0	#DIV/0!
FGF9	chr13	22243259	22245362	NM_002010	+	1	33391	2.87016	0.62568	0.217995
NAP1L3	chrX	92928546	92928786	NM_004538	-	1	33649	0.277758	0.195525	0.703941
GABBR2	chr9	101469579	101472154	NM_005458	-	1	34005	0	0.07821	#DIV/0!
TUB	chr11	8102358	8102913	NM_177972	+	1	34181	2.54611	0.195525	0.0767935
ANKRD34B	chr5	79864842	79866447	NM_001004441	-	1	34714	0	0	#DIV/0!
COL14A1	chr8	121137099	121137778	NM_021110	+	1	35174	14.5823	3.48034	0.238669
C9orf171	chr9	135285310	135285897	NM_207417	+	1	35570	0	0.15642	#DIV/0!
CCDC8	chr19	46916587	46916862	NM_032040	-	1	35670	0.0462929	0	0
RNF220	chr1	44871109	44874047	NM_018150	+	1	36221	29.072	38.6748	1.33031
MXRA5	chrX	3263353	3265347	NM_015419	-	1	36279	18.332	18.4576	1.00685
EBF2	chr8	25900562	25905842	NM_022659	-	1	37300	0	0	#DIV/0!
PNPLA5	chr22	44287497	44288061	NM_138814	-	1	40487	0	0	#DIV/0!
WNT3	chr17	44895800	44897025	NM_030753	-	1	40726	0.370344	0.31284	0.844729
DSCAML1	chr11	117666634	117668141	NM_020693	-	1	40769	3.47197	0.039105	0.0112631
MYO5A	chr15	52820333	52821639	NM_000259	-	1	1292	14.1656	8.72041	0.615603
TUSC3	chr8	15397636	15398287	NM_178234	+	1	4533	10.277	0.821205	0.0799068
LPPR5	chr1	99469932	99470968	NM_001010861	-	1	9708	0	0.23463	#DIV/0!
RRP15	chr1	218458019	218458684	NM_016052	+	1	14238	15.4618	21.5468	1.39355
FAM72B	chr1	120835961	120839391	NM_001100910	+	1	16106	0.370344	0.508365	1.37268
FIGN	chr2	164592917	164593511	NM_018086	-	1	17193	0.972152	0.351945	0.362027
NECAB1	chr8	91803656	91804141	NM_022351	+	1	17801	0.555515	0.195525	0.35197
ATP8A2	chr13	25945993	25946953	NM_016529	+	1	18684	0.0925859	0.31284	3.37892
DZIP1	chr13	96296143	96297059	NM_198968	-	1	18756	3.24051	1.29046	0.398229
ST8SIA2	chr15	92936677	92938521	NM_006011	+	1	19858	0.185172	0	0
NPY	chr7	24323558	24325080	NM_000905	+	1	20413	0.277758	0	0
SLC35F1	chr6	118228042	118229811	NM_001029858	+	1	21373	0.833273	0.31284	0.375435
FOXI3	chr2	88751335	88752865	NM_001135649	-	1	22038	0	0	#DIV/0!
SPATA32	chr17	43339124	43339832	NM_152343	-	1	28142	0.416636	0	0
GPC6	chr13	93879245	93880877	NM_005708	+	1	28692	7.03653	1.99435	0.283429
LOC100129620	chr1	99469932	99470968	NR_033940	+	1	28709	0	0	#DIV/0!
PROCA1	chr17	27038084	27038919	NM_152465	-	1	30832	0.648101	0.195525	0.301689
THY1	chr11	119293320	119293943	NM_006288	-	1	30854	5.13852	6.53053	1.2709
GUCY1A2	chr11	106888323	106890203	NM_001256424	-	1	32528	3.14792	0.54747	0.173915
MAP3K14-AS1	chr17	43339124	43339832	NR_024435	+	1	32944	2.22206	1.72062	0.774335
EVX2	chr2	176949511	176949795	NM_001080458	-	1	35187	0.277758	0	0
STOX2	chr4	184826253	184828177	NM_020225	+	1	35824	0.972152	0.54747	0.563153
KANK1	chr9	707021	707420	NM_153186	+	1	29272	13.6564	27.2171	1.99299
LHX8	chr1	75600674	75601415	NM_001256114	+	1	2007	0	0	#DIV/0!
ZFP28	chr19	57049675	57050646	NM_020828	+	1	2247	2.87016	2.22898	0.776606
JAM3	chr11	133938850	133939681	NM_001205329	+	1	2795	4.99964	2.73735	0.547509
FERD3L	chr7	19184221	19184686	NM_152898	-	1	3098	0	0	#DIV/0!
PSD	chr10	104178528	104179548	NM_001270965	-	1	3278	0.185172	0.07821	0.422364
PDE4B	chr1	66258440	66258918	NM_002600	+	1	6066	5.18481	20.2173	3.89933
ZNF14	chr19	19843482	19843943	NM_021030	-	1	7205	3.10163	2.03346	0.655611
LHCGR	chr2	48982621	48982958	NM_000233	-	1	8310	0	0	#DIV/0!
B4GALNT1	chr12	58025661	58027056	NM_001276468	-	1	8505	0.277758	0.195525	0.703941
MAPK11	chr22	50708190	50710490	NM_002751	-	1	8600	0.324051	0.351945	1.08608
POU4F1	chr13	79175610	79177985	NM_006237	-	1	10317	0	0	#DIV/0!
TBX5-AS1	chr12	114845861	114847650	NR_038440	+	1	11108	0	0	#DIV/0!
WTIP	chr19	34972054	34973645	NM_001080436	+	1	11110	0.231465	0.39105	1.68946
ZNF418	chr19	58446336	58446800	NM_133460	-	1	11845	0.78698	0.07821	0.0993799
SORCS3	chr10	106399567	106402812	NM_014978	+	1	13135	0.0925859	0	0
AJAP1	chr1	4713989	4716555	NM_001042478	+	1	15182	0	0	#DIV/0!
ULBP1	chr6	150284682	150286515	NM_025218	+	1	17858	0.0462929	0.31284	6.75783
TLX1	chr10	102891010	102891794	NM_005521	+	1	19054	0	0.273735	#DIV/0!
PDE4C	chr19	18335072	18337375	NM_001098818	-	1	20872	0.648101	1.09494	1.68946
ASIC2	chr17	31618345	31620465	NM_183377	-	1	20975	0.231465	0	0
DDIT4L	chr4	101111146	101111497	NM_145244	-	1	22799	0.0925859	0.39105	4.22364
DUSP5	chr10	112257163	112258684	NM_004419	+	1	22855	9.39747	0.93852	0.0998694
ZNF345	chr19	37341731	37342000	NM_001242475	+	1	24377	1.06474	0.977625	0.918184
TLX1NB	chr10	102891010	102891794	NM_001085398	-	1	25882	0.0462929	0.07821	1.68946
SYCP2L	chr6	10887184	10887622	NM_001040274	+	1	27550	0	0.039105	#DIV/0!
CSMD1	chr8	4848968	4852635	NM_033225	-	1	29622	0.370344	0.039105	0.105591
C5orf49	chr5	7850957	7851413	NM_001089584	-	1	32737	0	0	#DIV/0!
ZNF329	chr19	58661737	58662287	NM_024620	-	1	33411	2.6387	1.68151	0.637252
MAP9	chr4	156297601	156298094	NM_001039580	-	1	36720	1.9443	1.01673	0.522927
CYP26A1	chr10	94833272	94835256	NM_000783	+	1	37519	0	0	#DIV/0!
LOC100505715	chr19	44405817	44406053	NR_038334	-	1	37566	1.15732	0.664785	0.574416
OTX2-AS1	chr14	57278709	57279116	NR_029385	+	1	39572	0	0	#DIV/0!
FBXL15	chr10	104178528	104179548	NM_024326	+	1	39680	7.8698	4.49707	0.571434
PIANP	chr12	6809214	6809816	NM_001244015	-	1	225	0.509222	0.15642	0.307174
SLFN13	chr17	33775294	33775794	NM_144682	-	1	515	5.41627	0.7821	0.144398
EFCC1	chr3	128719865	128721245	NM_024768	+	1	996	1.38879	2.03346	1.4642
HOXC9	chr12	54393374	54394648	NM_006897	+	1	1169	0	0	#DIV/0!
PAX7	chr1	18956895	18959829	NM_013945	+	1	2376	0	0	#DIV/0!
ISLR2	chr15	74419870	74423044	NM_020851	+	1	2702	0.0925859	0	0
GAS2	chr11	22688285	22688617	NM_001143830	+	1	2724	0.462929	1.17315	2.53419
CHFR	chr12	133463807	133464858	NM_018223	-	1	3019	11.2955	0.7821	0.0692401
LOC100506421	chr2	105468851	105473488	NR_037883	-	1	3102	0	0	#DIV/0!
NTM	chr11	131780328	131781532	NM_001144058	+	1	3348	1.57396	0.742995	0.472054
LHX5	chr12	113908887	113910681	NM_022363	-	1	3674	0	0	#DIV/0!
CRHR2	chr7	30721372	30722445	NM_001202483	-	1	3737	0.138879	0	0
MAL	chr2	95690857	95692431	NM_002371	+	1	4015	0.462929	0.351945	0.760256
SGK1	chr6	134638797	134639021	NM_001143676	-	1	4407	21.0633	7.35174	0.349031
DBC1	chr9	122131086	122132214	NM_014618	-	1	4886	0.185172	0	0
CRHR1	chr17	43860684	43862928	NM_001145148	+	1	5801	0	0	#DIV/0!
ZNF280B	chr22	22862623	22863220	NM_080764	-	1	6238	1.75913	3.51945	2.00067
CADM2	chr3	85008284	85008837	NM_001167674	+	1	6522	1.01844	0.15642	0.153587
TMTC1	chr12	29935995	29937433	NM_001193451	-	1	6544	4.35154	3.83229	0.880675
FAM196A	chr10	128993505	128995167	NM_001039762	-	1	6576	1.3425	0.899415	0.669957
KCNK12	chr2	47796923	47799166	NM_022055	-	1	7014	0.0462929	0	0
SYNDIG1L	chr14	74892466	74893184	NM_001105579	-	1	7376	0	0	#DIV/0!
RGS20	chr8	54791845	54795141	NM_003702	+	1	7417	0	0.117315	#DIV/0!
CRTAC1	chr10	99789614	99791320	NM_018058	-	1	7437	0.138879	0	0
DST	chr6	56818873	56820308	NM_001144769	-	1	7447	330.022	337.75	1.02341
EPHA5	chr4	66536065	66536674	NM_182472	-	1	8769	0.277758	0.039105	0.140788
ZNF548	chr19	57901091	57901517	NM_152909	+	1	9240	6.29584	7.93831	1.26088
CDH23	chr10	73156164	73157954	NM_001171932	+	1	9422	0.138879	0	0
PCDH10	chr4	134069162	134070442	NM_032961	+	1	9484	0.370344	0	0
MLF1	chr3	158288800	158289271	NM_001195433	+	1	10300	0.78698	1.75972	2.23605
OLIG2	chr21	34395128	34400245	NM_005806	+	1	10321	0	0	#DIV/0!
C3orf72	chr3	138663718	138666346	NM_001040061	+	1	10338	0	0	#DIV/0!
TMEM108	chr3	132756985	132757895	NM_001136469	+	1	10350	0.0925859	0.07821	0.844729
RUNDC3A	chr17	42385810	42386393	NM_006695	+	1	10716	0.138879	0.039105	0.281576
C17orf102	chr17	32905965	32908951	NM_207454	-	1	10960	0	0	#DIV/0!
MCTP1	chr5	94619459	94621121	NM_024717	-	1	11783	4.86076	2.42451	0.498792
PLCB1	chr20	8112884	8113592	NM_015192	+	1	11883	3.33309	10.7148	3.21466
LOC283731	chr15	74419870	74423044	NR_027073	-	1	12213	0.0925859	0.351945	3.80128
TCTEX1D1	chr1	67218079	67218293	NM_152665	+	1	13988	0.0925859	0	0
KCNS3	chr2	18059038	18059245	NM_002252	+	1	14020	0.740687	0.664785	0.897524
DYNC1I1	chr7	95401691	95402432	NM_001135557	+	1	15323	0.185172	0.31284	1.68946
GRP	chr18	56887091	56887665	NM_001012512	+	1	15811	0	0	#DIV/0!
WDR86-AS1	chr7	151106244	151107808	NR_034012	+	1	16039	0.0462929	0.039105	0.844729
LOC644554	chr19	38307878	38308526	NR_040013	+	1	16433	0.0462929	0	0
RIMS1	chr6	72596036	72596404	NM_014989	+	1	16514	0	0.195525	#DIV/0!
CHST9	chr18	24764951	24765507	NM_001256316	-	1	17711	0	0	#DIV/0!
LIN28A	chr1	26737246	26738148	NM_024674	+	1	19072	0	0	#DIV/0!
POU3F3	chr2	105468851	105473488	NM_006236	+	1	21474	0	0	#DIV/0!
SRRM4	chr12	119418591	119418834	NM_194286	+	1	22586	0	0.07821	#DIV/0!
CDH11	chr16	65154656	65157664	NM_001797	-	1	22659	8.56419	9.4243	1.10043
HIC2	chr22	21770896	21772442	NM_015094	+	1	24096	11.851	5.35738	0.452062
CDKN2A	chr9	21974578	21975306	NM_000077	-	1	24528	0.462929	0.15642	0.337892
HSD17B14	chr19	49340488	49340774	NM_016246	-	1	25598	1.3425	0.46926	0.349543
ADCY4	chr14	24803678	24804353	NM_001198592	-	1	25926	3.47197	2.50272	0.720835
EBF4	chr20	2672904	2674698	NM_001110514	+	1	26154	0.648101	0.23463	0.362027
FEZF2	chr3	62357639	62359774	NM_018008	-	1	26691	0	0	#DIV/0!
MCF2L2	chr3	183145427	183146790	NM_015078	-	1	26804	0.509222	0.273735	0.537555
FOXL2	chr3	138663718	138666346	NM_023067	-	1	28035	0	0	#DIV/0!
UNC5D	chr8	35092679	35093559	NM_080872	+	1	28451	0.78698	0.23463	0.29814
EGR4	chr2	73518364	73520986	NM_001965	-	1	28807	0.0925859	0	0
MSX2P1	chr17	56234321	56234827	NR_002307	+	1	29729	0	0.07821	#DIV/0!
RFX4	chr12	106975195	106975714	NM_213594	+	1	31391	0	0.23463	#DIV/0!
ATCAY	chr19	3880718	3881278	NM_033064	+	1	32024	0.231465	0	0
GRID1	chr10	88122924	88127364	NM_017551	-	1	33080	0.0925859	0.195525	2.11182
BEND6	chr6	56818873	56820308	NM_152731	+	1	33469	0.555515	0.07821	0.140788
WDR86	chr7	151106244	151107808	NM_198285	-	1	34304	0	0	#DIV/0!
KIAA1217	chr10	23983366	23984978	NM_001098500	+	1	35360	90.7342	107.539	1.18521
C15orf26	chr15	81426499	81426702	NM_173528	+	1	35884	0	0	#DIV/0!
LOC100144602	chr4	66536065	66536674	NR_034138	+	1	36065	0	0	#DIV/0!
TMEM132E	chr17	32905965	32908951	NM_207313	+	1	37591	0	0	#DIV/0!
NKX2-2	chr20	21485932	21496714	NM_002509	-	1	37936	0.833273	0	0
C3orf80	chr3	159942916	159944431	NM_001168214	+	1	38463	0.324051	0.15642	0.482702
EOMES	chr3	27762351	27763995	NM_005442	-	1	38698	0.277758	0.039105	0.140788
WDR72	chr15	54051655	54052004	NM_182758	-	1	16654	6.29584	56.6631	9.00009
LOC339529	chr1	244080540	244081093	NR_033883	+	1	21983	0	0	#DIV/0!
SPHKAP	chr2	229045957	229046553	NM_001142644	-	1	25570	0.0462929	0	0
TNFRSF19	chr13	24152899	24154140	NM_001204458	+	1	27163	1.9443	0.430155	0.221239
MGA	chr15	41952535	41953222	NM_001164273	+	1	27467	51.2926	69.3722	1.35248
TUBB6	chr18	12307554	12309043	NM_032525	+	1	36992	3.79602	1.75972	0.463571
FBLIM1	chr1	16085147	16085862	NM_017556	+	1	949	64.9953	33.8649	0.521037
MOS	chr8	57025546	57026543	NM_005372	-	1	1291	0	0	#DIV/0!
PHYHIP	chr8	22089367	22089668	NM_014759	-	1	1371	0.0925859	0.23463	2.53419
FGFR1	chr8	38325091	38326374	NM_001174065	-	1	1429	5.55515	3.71497	0.668744
FOXE1	chr9	100615234	100617510	NM_004473	+	1	2280	0	0	#DIV/0!
POU3F2	chr6	99279317	99283842	NM_005604	+	1	2360	0.0462929	0	0
MAF	chr16	79632619	79635537	NM_001031804	-	1	2743	8.98083	2.77645	0.309153
SIX6	chr14	60975732	60978180	NM_007374	+	1	3871	0	0	#DIV/0!
ZNF132	chr19	58951214	58952250	NM_003433	-	1	4127	2.82387	1.21225	0.429288
EFTUD1P1	chr15	84748593	84749285	NR_036652	+	1	5229	1.11103	1.40778	1.26709
SORCS1	chr10	108923780	108924805	NM_001206572	-	1	6256	0.833273	0.15642	0.187718
EDARADD	chr1	236558459	236559336	NM_145861	+	1	6736	9.62893	9.65893	1.00312
COL15A1	chr9	101705907	101706682	NM_001855	+	1	10319	8.28644	3.67587	0.443601
GAD2	chr10	26504383	26507434	NM_000818	+	1	10844	0.324051	0	0
TTC25	chr17	40086751	40087098	NM_031421	+	1	12207	0.138879	0.54747	3.94207
SP8	chr7	20823307	20825662	NM_198956	-	1	12479	0	0.117315	#DIV/0!
CAMKV	chr3	49906737	49907482	NM_024046	-	1	12556	0.0925859	0	0
CHD6	chr20	40246345	40247841	NM_032221	-	1	13064	28.9794	42.468	1.46546
KIAA1549	chr7	138666358	138666972	NM_001164665	-	1	15555	5.04593	38.7921	7.68781
KCNJ3	chr2	155554005	155556069	NM_001260509	+	1	15794	0.555515	0.39105	0.703941
LOC646999	chr7	39649253	39649510	NR_024390	+	1	16319	0.0925859	0.07821	0.844729
KIAA1755	chr20	36888891	36889442	NM_001029864	-	1	16691	0.324051	0.664785	2.05148
HOPX	chr4	57521621	57522703	NM_001145459	-	1	17263	0.370344	2.46361	6.65224
ELAVL2	chr9	23820691	23822135	NM_001171195	-	1	20092	0.138879	0	0
ZNF480	chr19	52800399	52800871	NM_144684	+	1	20349	18.332	24.6361	1.34389
ZNF208	chr19	22193330	22193583	NM_007153	-	1	20898	0.416636	0.15642	0.375435
EID1	chr15	49170144	49170710	NM_014335	+	1	21646	76.5685	58.9703	0.770164
ZNF853	chr7	6654745	6655860	NM_017560	+	1	22113	0.231465	0.07821	0.337892
CNGA3	chr2	98962873	98964187	NM_001298	+	1	23084	0.555515	0	0
SEZ6	chr17	27332268	27333188	NM_001098635	-	1	24153	0.555515	0.07821	0.140788
BNC1	chr15	83951980	83953930	NM_001717	-	1	25139	0.138879	0	0
GNB4	chr3	179168735	179169593	NM_021629	-	1	25907	9.58264	4.06692	0.424405
FAM19A2	chr12	62584768	62586268	NM_178539	-	1	26013	0.833273	0	0
NEFL	chr8	24812946	24814299	NM_006158	-	1	26582	0.694394	5.04454	7.26467
HS3ST1	chr4	11429414	11429633	NM_005114	-	1	27270	4.90705	6.21769	1.26709
SHC3	chr9	91792662	91793611	NM_016848	-	1	27647	0.0462929	1.01673	21.963
FGF14	chr13	102568425	102569495	NM_004115	-	1	30235	0.601808	0	0
TFAP2B	chr6	50787286	50788091	NM_003221	+	1	30441	0	0	#DIV/0!
CAND2	chr3	12837992	12838359	NM_001162499	+	1	30762	1.06474	0.821205	0.771274
FAM162B	chr6	117085739	117086942	NM_001085480	-	1	31439	0.231465	0.07821	0.337892
TBR1	chr2	162273294	162273725	NM_006593	+	1	31482	0	0	#DIV/0!
HCRTR2	chr6	55039170	55039392	NM_001526	+	1	31826	0	0	#DIV/0!
HCN1	chr5	45695394	45696510	NM_021072	-	1	32039	0.231465	0.54747	2.36524
WWTR1-AS1	chr3	149374709	149376300	NR_040250	+	1	32064	0	0	#DIV/0!
ZNF850	chr19	37263381	37264083	NM_001267779	-	1	33275	4.21266	5.31828	1.26245
GALNT9	chr12	132689880	132690197	NM_021808	-	1	35219	0	0	#DIV/0!
HOXC8	chr12	54402682	54403347	NM_022658	+	1	35551	0	0	#DIV/0!
CNIH3	chr1	224803637	224805314	NM_152495	+	1	36102	0.231465	0.93852	4.0547
WWTR1	chr3	149374709	149376300	NM_015472	-	1	36562	15.7396	9.18967	0.583857
KIAA1024	chr15	79724099	79725643	NM_015206	+	1	37522	0.462929	1.21225	2.61866
CALN1	chr7	71800757	71802768	NM_001017440	-	1	37523	0.879566	0	0
C17orf82	chr17	59488115	59490485	NM_203425	+	1	37524	0	0.07821	#DIV/0!
SOX14	chr3	137482964	137484454	NM_004189	+	1	38805	0	0.039105	#DIV/0!
CELF4	chr18	35144907	35147628	NM_001025089	-	1	196	0.231465	0.07821	0.337892
FRMD3	chr9	86152353	86153777	NM_001244959	-	1	1511	13.1009	3.28482	0.250732
NXNL2	chr9	91149945	91150648	NM_145283	+	1	3238	0	0.07821	#DIV/0!
FREM2	chr13	39261236	39262299	NM_207361	+	1	3649	1.01844	6.72606	6.60424
LHX2	chr9	126773246	126780953	NM_004789	+	1	4326	0.0462929	0.23463	5.06837
ZNF266	chr19	9545783	9546302	NM_006631	-	1	4463	15.2767	12.3963	0.811452
KLHL28	chr14	45431628	45432115	NM_017658	-	1	5699	17.6376	17.519	0.993277
DRGX	chr10	50602989	50606783	NM_001276451	-	1	6831	0	0	#DIV/0!
NPR3	chr5	32709910	32714450	NM_001204375	+	1	8079	0.185172	0.195525	1.05591
TRIM9	chr14	51560116	51562487	NM_052978	-	1	8410	0.231465	0.07821	0.337892
LAMA1	chr18	7116852	7118241	NM_005559	-	1	9421	10.6474	0.39105	0.0367273
GRIK3	chr1	37498377	37500624	NM_000831	-	1	10939	1.15732	0.351945	0.304102
PALLD	chr4	169753048	169754535	NM_001166110	+	1	11028	79.0221	78.953	0.999126
WNT7B	chr22	46371469	46375234	NM_058238	-	1	11130	0	0.07821	#DIV/0!
OGDHL	chr10	50969658	50970605	NM_001143997	-	1	12380	0.138879	0.15642	1.12631
RSPO4	chr20	982652	983252	NM_001040007	-	1	13967	0	0	#DIV/0!
FOLH1	chr11	49229717	49230040	NM_001193472	-	1	14543	0.0925859	0.195525	2.11182
FAM179B	chr14	45431628	45432115	NM_015091	+	1	15094	14.2119	18.2229	1.28223
COL25A1	chr4	110222970	110224257	NM_001256074	-	1	15501	0	0	#DIV/0!
SLC27A6	chr5	128300800	128301329	NM_014031	+	1	16440	0.694394	0	0
PRDM13	chr6	100054686	100054988	NM_021620	+	1	16824	0	0.70389	#DIV/0!
MGAT5B	chr17	74864170	74866657	NM_144677	+	1	16891	0.0462929	0.07821	1.68946
DLGAP1	chr18	4453969	4455647	NM_004746	-	1	17636	0.185172	0.15642	0.844729
GLRA3	chr4	175750330	175750584	NM_006529	-	1	18091	0	0	#DIV/0!
CDH2	chr18	25755414	25758175	NM_001792	-	1	18848	0.370344	0	0
HKR1	chr19	37825101	37825756	NM_181786	+	1	19049	8.19385	8.36847	1.02131
AMER3	chr2	131513363	131514183	NM_001105193	+	1	20069	1.06474	0.07821	0.0734547
VWCE	chr11	61061751	61063063	NM_152718	-	1	22130	0	0.117315	#DIV/0!
SIX1	chr14	61114102	61116552	NM_005982	-	1	26299	0.0462929	0.15642	3.37892
POU3F1	chr1	38510102	38513642	NM_002699	-	1	28530	0	0.07821	#DIV/0!
DBX2	chr12	45444202	45445386	NM_001004329	-	1	28719	0	0	#DIV/0!
DLX2	chr2	172964762	172967857	NM_004405	-	1	28812	0	0	#DIV/0!
VSTM4	chr10	50323184	50323735	NM_144984	-	1	29548	0.231465	0.07821	0.337892
HIST2H3D	chr1	149784592	149785212	NM_001123375	-	1	29964	0.138879	0.039105	0.281576
ZNF578	chr19	52956656	52957245	NM_001099694	+	1	30218	0.78698	0.15642	0.19876
FAT4	chr4	126235895	126238930	NM_024582	+	1	30913	10.0456	9.46341	0.942048
RSPO2	chr8	109094485	109095849	NM_178565	-	1	32979	1.11103	0.117315	0.105591
FAM118A	chr22	45705511	45706616	NM_001104595	+	1	34049	8.5179	8.79862	1.03296
RHOF	chr12	122230903	122232359	NM_019034	-	1	36106	28.3776	6.60874	0.232886
BNIP3	chr10	133794406	133794637	NM_004052	-	1	37011	1.71284	1.52509	0.89039
PITX2	chr4	111542062	111544464	NM_000325	-	1	35784	0.0925859	7.54726	81.5163
TMEM26	chr10	63212495	63213009	NM_178505	-	1	39747	0.462929	0.742995	1.60498
ANKDD1A	chr15	65203730	65204392	NM_182703	+	1	39897	1.20362	0.821205	0.682281
MCHR2	chr6	100441406	100442152	NM_001040179	-	1	435	0	0	#DIV/0!
CIDEA	chr18	12254147	12255089	NR_036468	+	1	1906	0	0	#DIV/0!
CDIP1	chr16	4587836	4588890	NM_001199056	-	1	3619	6.15696	1.79883	0.292162
FAM156A	chrX	53024599	53024966	NM_001242492	-	1	3969	6.15696	3.75408	0.609729
DYNC1H1	chr14	102430636	102431898	NM_001376	+	1	4726	173.83	264.35	1.52074
KIF1C	chr17	4900357	4901798	NM_006612	+	1	6020	47.6354	28.7031	0.602557
OTOP3	chr17	72931729	72932601	NM_178233	+	1	6407	0.185172	0	0
DRAXIN	chr1	11750701	11752651	NM_198545	+	1	6448	0	0.07821	#DIV/0!
GDNF	chr5	37834671	37835128	NM_001190469	-	1	6947	1.62025	0.39105	0.241351
CITED4	chr1	41326949	41328285	NM_133467	-	1	7505	0.0925859	0.70389	7.60256
WBSCR17	chr7	70596228	70598382	NM_022479	+	1	8424	0.0925859	0.23463	2.53419
CRHBP	chr5	76249435	76250528	NM_001882	+	1	9284	0.416636	0.15642	0.375435
C7orf10	chr7	40173881	40175018	NM_024728	+	1	10393	2.96275	0.15642	0.0527956
RGCC	chr13	42030913	42032667	NM_014059	+	1	11371	0.509222	3.05019	5.9899
HIST3H2BB	chr1	228645196	228646434	NM_175055	+	1	12346	0	0	#DIV/0!
TJP2	chr9	71788715	71789542	NM_004817	+	1	12488	86.6141	94.8296	1.09485
MGC12916	chr17	14204168	14207702	NR_026880	+	1	12968	0.185172	0.07821	0.422364
DACT2	chr6	168719681	168720495	NM_214462	-	1	13320	1.01844	0.46926	0.460761
JPH3	chr16	87636506	87637284	NM_001271604	+	1	15217	0.138879	0.039105	0.281576
MAD2L2	chr1	11750701	11752651	NM_001127325	-	1	15357	2.22206	4.06692	1.83025
LY6H	chr8	144240761	144242113	NM_001135655	-	1	15652	0	0	#DIV/0!
LOC642366	chr5	50678632	50679375	NR_046243	-	1	15783	2.5924	0.70389	0.27152
MTHFD1L	chr6	151186747	151188112	NM_001242767	+	1	17824	2.68499	10.2064	3.80128
ATP6AP2	chrX	40439739	40440705	NM_005765	+	1	18116	44.6727	37.4235	0.837726
SLC35G2	chr3	136537559	136539204	NM_025246	+	1	18298	0.601808	0.39105	0.649791
NOS1	chr12	117798076	117799448	NM_001204218	-	1	18343	0.185172	0	0
INCA1	chr17	4900357	4901798	NM_001167987	-	1	18672	3.61085	1.40778	0.389875
KIAA1211L	chr2	99552185	99553831	NM_207362	-	1	19271	3.84231	8.79862	2.28993
LOC728392	chr17	5403131	5404602	NM_001162371	-	1	20955	1.89801	0.39105	0.206031
MIR3663	chr10	118927021	118928132	NR_037436	-	1	22299	0	0	#DIV/0!
CLIP4	chr2	29337983	29338909	NM_024692	+	1	22378	2.82387	1.13404	0.401592
SHANK3	chr22	51111935	51113742	NM_033517	+	1	22606	1.2962	1.13404	0.874898
IRX6	chr16	55357521	55359040	NM_024335	+	1	22627	0	0	#DIV/0!
C12orf68	chr12	48577361	48578574	NM_001013635	+	1	23376	0.277758	0	0
MPLKIP	chr7	40173881	40175018	NM_138701	-	1	25794	6.24955	6.49143	1.0387
SLC32A1	chr20	37352130	37357372	NM_080552	+	1	26217	0	0	#DIV/0!
ZNF433	chr19	12146030	12146649	NM_001080411	-	1	28818	0.740687	0.664785	0.897524
TMEM132C	chr12	128751041	128753151	NM_001136103	+	1	30427	0.138879	0.07821	0.563153
ZNF354C	chr5	178487146	178487921	NM_014594	+	1	30845	0.879566	0.586575	0.666891
NPBWR1	chr8	53851701	53854426	NM_005285	+	1	31357	0	0	#DIV/0!
ISL1	chr5	50678632	50679375	NM_002202	+	1	32224	4.67559	4.77081	1.02037
LOC728012	chr6	100441406	100442152	NR_038384	+	1	32251	0	0	#DIV/0!
NUS1	chr6	117996395	117997375	NM_138459	+	1	33851	22.0354	27.9992	1.27064
BAI3	chr6	69345216	69345483	NM_001704	+	1	34335	0.462929	0	0
HIST3H2A	chr1	228645196	228646434	NM_033445	-	1	34413	0.324051	4.18423	12.9123
ADCY8	chr8	132052203	132054749	NM_001115	-	1	38469	0.0925859	0	0
EN2	chr7	155246390	155251955	NM_001427	+	1	38476	0	0.54747	#DIV/0!
KCNA4	chr11	30037672	30037944	NM_002233	-	1	39286	0.0462929	0	0
SLC25A43	chrX	118533163	118533787	NM_145305	+	1	39564	30.5533	24.3624	0.797373
HS3ST3B1	chr17	14204168	14207702	NM_006041	+	1	39845	0.601808	0.664785	1.10465
BHLHE23	chr20	61636171	61639055	NM_080606	-	1	40951	0	0	#DIV/0!
CNIH2	chr11	66045211	66045708	NR_073078	+	1	255	0.138879	0.07821	0.563153
SCAMP5	chr15	75287694	75288699	NM_001178111	+	1	305	3.05533	1.05583	0.345571
MLH1	chr3	37034228	37035356	NM_001258273	+	1	3052	22.6835	19.7089	0.868864
WT1-AS	chr11	32454874	32457311	NR_023920	+	1	5712	0	0	#DIV/0!
ZNF662	chr3	42947480	42948170	NM_001134656	+	1	5846	7.36058	2.18988	0.297515
NR5A2	chr1	200011400	200012055	NM_001276464	+	1	12471	74.3002	8.83773	0.118946
EPM2AIP1	chr3	37034228	37035356	NM_014805	-	1	12474	27.8684	16.8934	0.606184
CHAT	chr10	50821487	50821688	NM_001142933	+	1	13930	0.416636	0	0
PRIMA1	chr14	94253952	94255733	NM_178013	-	1	19829	4.30524	0.664785	0.154413
PTPRN	chr2	220173021	220173271	NM_001199764	-	1	22750	0.509222	0	0
FAM43A	chr3	194406440	194409045	NM_153690	+	1	23539	6.15696	4.37976	0.711351
INSR	chr19	7293340	7294450	NM_000208	-	1	24964	110.131	83.059	0.754184
TUSC1	chr9	25677494	25678684	NM_001004125	-	1	25174	3.84231	2.69824	0.702245
MTERF	chr7	91509997	91510427	NM_006980	-	1	28358	6.43472	2.46361	0.382863
BARHL2	chr1	91182097	91182364	NM_020063	-	1	29259	0	0	#DIV/0!
CCDC140	chr2	223161531	223161919	NM_153038	+	1	35269	0	0	#DIV/0!
WT1	chr11	32454874	32457311	NM_024426	-	1	35814	0	0.07821	#DIV/0!
CA4	chr17	58227241	58227720	NM_000717	+	1	38425	101.382	1.13404	0.0111859
RIMS4	chr20	43438737	43439546	NM_001205317	-	1	39483	0.740687	0	0
TP73	chr1	3566445	3569636	NM_001204186	+	1	1141	1.06474	0.23463	0.220364
LOC100507564	chr1	53703959	53704642	NR_038953	+	1	1422	0.648101	0.430155	0.663716
ADAT3	chr19	1905106	1905835	NM_138422	+	1	1720	1.85172	0.7821	0.422364
LIG4	chr13	108867107	108867364	NM_002312	-	1	2452	13.2861	6.02217	0.453269
KIF3C	chr2	26204554	26205649	NM_002254	-	1	2746	0.925859	5.16186	5.57521
CHRM2	chr7	136553854	136556194	NM_000739	+	1	2819	0.185172	0	0
ZFPM1	chr16	88518729	88522514	NM_153813	+	1	3176	0.925859	0.742995	0.802492
STRAP	chr12	16034931	16035836	NM_007178	+	1	3624	29.1183	39.3787	1.35237
HBEGF	chr5	139725530	139726234	NM_001945	-	1	4289	14.6286	7.66458	0.523946
TUG1	chr22	31364564	31365575	NR_002323	+	1	4638	157.442	180.626	1.14725
SRD5A2	chr2	31805293	31806403	NM_000348	-	1	5729	0.0925859	0	0
ZNF74	chr22	20748094	20748811	NM_001256525	+	1	6045	1.2962	5.12275	3.95212
COL16A1	chr1	32169537	32169869	NM_001856	-	1	6613	2.6387	2.50272	0.948468
ABHD12	chr20	25370335	25371823	NM_001042472	-	1	7410	18.1468	19.7871	1.09039
RGS9BP	chr19	33165266	33168099	NM_207391	+	1	8049	0.0925859	0	0
RPL31	chr2	101618247	101618658	NM_000993	+	1	8119	234.844	469.846	2.00067
C11orf63	chr11	122753386	122753951	NM_024806	+	1	8150	1.48137	2.89377	1.95344
DMRT1	chr9	841374	843364	NM_021951	+	1	9053	0	0	#DIV/0!
SCAMP4	chr19	1905106	1905835	NM_079834	+	1	9390	12.8694	12.8264	0.996659
SLC5A8	chr12	101603387	101603933	NM_145913	-	1	9394	1.66655	0	0
SST	chr3	187387914	187388176	NM_001048	-	1	9905	134.666	0.39105	0.00290385
MORC2	chr22	31364564	31365575	NM_014941	-	1	10673	10.6937	14.8599	1.3896
ANKRD27	chr19	33165266	33168099	NM_032139	-	1	10711	32.5439	26.9433	0.827906
OTP	chr5	76932317	76933523	NM_032109	-	1	10794	0	0	#DIV/0!
STEAP3	chr2	119981079	119981818	NM_001008410	+	1	10857	8.19385	13.2566	1.61787
LAMP1	chr13	113951096	113951990	NM_005561	+	1	11336	150.637	149.146	0.990103
GRIK1	chr21	31311386	31312106	NM_175611	-	1	11359	0.416636	0.117315	0.281576
WRAP73	chr1	3566445	3569636	NM_017818	-	1	12004	3.19421	3.79318	1.18752
GRB10	chr7	50861390	50861638	NM_001001555	-	1	13370	4.44412	16.385	3.68689
CHODL	chr21	19617098	19617874	NM_024944	+	1	14219	0.879566	0.15642	0.177838
FAM155A	chr13	108518334	108518633	NM_001080396	-	1	14318	0.231465	0.15642	0.675783
RALGAPA1	chr14	36277778	36278620	NM_194301	-	1	15282	33.0995	26.9042	0.81283
APCDD1L-AS1	chr20	57089460	57090237	NR_034147	+	1	15760	0	0	#DIV/0!
POU4F3	chr5	145718289	145720095	NM_002700	+	1	16491	0	0.07821	#DIV/0!
MFSD2A	chr1	40420487	40421366	NM_001136493	+	1	16887	10.0456	5.59201	0.556665
GPC2	chr7	99774733	99775583	NM_152742	-	1	17545	0.0462929	0.039105	0.844729
STAG3	chr7	99774733	99775583	NM_012447	+	1	21276	0.416636	0.430155	1.03245
ORC2	chr2	201828015	201828514	NR_033915	-	1	21379	13.3324	15.9548	1.1967
RBM28	chr7	127983683	127984096	NM_001166135	-	1	21493	11.8973	17.9492	1.50868
CNNM3	chr2	97481356	97483276	NM_017623	+	1	25062	16.9432	27.6081	1.62945
APCDD1L	chr20	57089460	57090237	NM_153360	-	1	29218	0.370344	0.07821	0.211182
NFIX	chr19	13106817	13107688	NM_002501	+	1	29804	46.8485	75.9028	1.62018
IL20RA	chr6	137365299	137366126	NM_014432	-	1	30607	8.33273	21.1949	2.54357
SBSPON	chr8	74005021	74005856	NM_153225	-	1	30640	0.78698	14.5862	18.5343
SOCS1	chr16	11348541	11350803	NM_003745	-	1	30835	0.740687	0.15642	0.211182
RFC1	chr4	39367648	39368213	NM_001204747	-	1	31605	41.3396	45.6355	1.10392
FTL	chr19	49468372	49469376	NM_000146	+	1	31789	504.963	612.541	1.21304
MTX3	chr5	79286584	79287134	NM_001010891	-	1	32250	12.8694	13.1393	1.02097
LINC00398	chr13	31377145	31377493	NR_047012	+	1	32801	0	0.117315	#DIV/0!
MAGOH	chr1	53703959	53704642	NM_002370	-	1	33088	0.370344	0.93852	2.53419
FAIM2	chr12	50297580	50297988	NM_012306	-	1	33619	0.416636	6.2568	15.0174
LOC389033	chr2	130691702	130692102	NR_026740	-	1	34890	0	0	#DIV/0!
CPLX1	chr4	818646	820970	NM_006651	-	1	35317	0.0925859	0.430155	4.64601
DPP6	chr7	153583317	153585666	NM_001039350	+	1	36203	0.416636	0	0
VPS37B	chr12	123380333	123380894	NM_024667	-	1	36297	18.4709	10.9103	0.590675
TFAP2C	chr20	55200279	55206789	NM_003222	+	1	37077	0.879566	0.70389	0.80027
ABCA1	chr9	107689847	107690798	NM_005502	-	1	37177	39.5342	57.367	1.45107
TCF21	chr6	134210639	134211218	NM_198392	+	1	38144	7.77721	1.21225	0.155873
PLVAP	chr19	17487895	17488125	NM_031310	-	1	38236	5.04593	5.94396	1.17797
LOC100130155	chr8	65286067	65286659	NR_034102	+	1	38748	0	0	#DIV/0!
LINC00842	chr10	47151424	47151676	NR_033957	-	1	39647	1.20362	0.039105	0.0324896

## Sheet: 5_IIa EpiG. inactivated genes
Total number of genes hypermethylated in LST #5	1106
Hypermethylated in LST #5 but silent in normal	132
Epigenetically inactivated in LST #5	331
Symbol	Chr	Start	End	Gene ID	Strand	CpG	Pos	5_N_Xprn	5_IIa_Xprn	5_IIa_FC
WNT3A	chr1	228194096	228196512	NM_033131	+	1	2669	0	0	#DIV/0!
ZSCAN18	chr19	58609338	58609988	NM_023926	-	1	7127	4.7449	0.636106	0.134061
PPP1R16B	chr20	37434206	37435592	NM_001172735	+	1	7347	2.06709	1.48425	0.718038
MYH10	chr17	8533004	8534933	NM_005964	-	1	8729	8.22136	2.50202	0.304331
[truncated: 1,102 more rows]

## Sheet: G1_ EpiG. inactivated genes
Total number of genes hypermethylated in LST G1	560
[truncated: 563 more rows]

[truncated: 8 more sheets: G2_EpiG. inactivated genes, NG_EpiG. inactivated genes, 81_EpiG. inactivated genes, 82_EpiG. inactivated genes, 85_EpiG. inactivated genes, Sgnificantly upregulated, Significantly downregulated, Differentially expressed]
